# Supplementary material for: Improving SARS-CoV-2 variants monitoring in the absence of genomic surveillance capabilities: a serological study in Bolivian blood donors in October 2021 and June 2022
Source: eLife. 2025 Jul 18;13:RP94475. doi: 10.7554/eLife.94475 (PMC12274064; doi:10.7554/eLife.94475)
Supplement: Supplementary file 2. [file elife-94475-supp2.xlsx]

## Sheet: 2021
Location	BAU_ELISA	Interpretation_ELISA	Titre_SN_Bavpat	Interpretation_SN20_BAVPAT	Interpretation_SN640_BAVPAT	Titre_SN_Brazil	Interpretation_SN20_Brazil	Interpretation_SN640_Brazil	Titre_SN_India	Interpretation_SN20_India	Interpretation_SN640_India	Titre_SN_Omicron	Interpretation_SN20_Omicron	Interpretation_SN640_Omicron	Ratio_SN_BP_BR	RatioLog2_SN_BP_BR	Ratio_SN_BP_IN	RatioLog2_SN_BP_IN	Ratio_SN_BP_OM	RatioLog2_SN_BP_OM	Ratio_SN_IN_BR	RatioLog2_SN_IN_BR	Ratio_SN_BR_OM	RatioLog2_SN_BR_OM	Ratio_SN_IN_OM	RatioLog2_SN_IN_OM	Interpretation_Variant
Beni	19.085	NEG	NR	NEG	NEG	NR	NEG	NEG	NR	NEG	NEG	NR	NEG	NEG													NEG_ELISA
Beni	4781.5	POS	5120	POS	POS	2560	POS	POS	2560	POS	POS	160	POS	NEG	2	1	2	1	32	5	1	0	16	4	16	4	BP
Beni	207.97	POS	160	POS	NEG	80	POS	NEG	80	POS	NEG	10	NEG	NEG	2	1	2	1	16	4	1	0	8	3	8	3	BP
Beni	119.73	POS	80	POS	NEG	40	POS	NEG	40	POS	NEG	10	NEG	NEG	2	1	2	1	8	3	1	0	4	2	4	2	BP
Beni	6231.6	POS	640	POS	POS	10240	POS	POS	10240	POS	POS	160	POS	NEG	0.0625	-4	0.0625	-4	4	2	1	0	64	6	64	6	BR
Beni	247.96	POS	40	POS	NEG	640	POS	POS	80	POS	NEG	10	NEG	NEG	0.0625	-4	0.5	-1	4	2	0.125	-3	64	6	8	3	BR
Beni	1068.9	POS	80	POS	NEG	320	POS	NEG	640	POS	POS	10	NEG	NEG	0.25	-2	0.125	-3	8	3	2	1	32	5	64	6	IN
Beni	1068.9	POS	160	POS	NEG	640	POS	POS	160	POS	NEG	10	NEG	NEG	0.25	-2	1	0	16	4	0.25	-2	64	6	16	4	BR
Beni	38.995	POS	80	POS	NEG	40	POS	NEG	40	POS	NEG	10	NEG	NEG	2	1	2	1	8	3	1	0	4	2	4	2	BP
Beni	70.498	POS	80	POS	NEG	40	POS	NEG	40	POS	NEG	10	NEG	NEG	2	1	2	1	8	3	1	0	4	2	4	2	BP
Beni	29.773	DOU	40	POS	NEG	40	POS	NEG	10	NEG	NEG	10	NEG	NEG	1	0	4	2	4	2	0.25	-2	4	2	1	0	BP
Beni	366.98	POS	160	POS	NEG	320	POS	NEG	80	POS	NEG	10	NEG	NEG	0.5	-1	2	1	16	4	0.25	-2	32	5	8	3	BR
Beni	5691.8	POS	640	POS	POS	2560	POS	POS	1280	POS	POS	80	POS	NEG	0.25	-2	0.5	-1	8	3	0.5	-1	32	5	16	4	BR
Beni	1520	POS	640	POS	POS	1280	POS	POS	320	POS	NEG	80	POS	NEG	0.5	-1	2	1	8	3	0.25	-2	16	4	4	2	BR
Beni	18.936	NEG	NR	NEG	NEG	NR	NEG	NEG	NR	NEG	NEG	NR	NEG	NEG													NEG_ELISA
Beni	186.6	POS	20	POS	NEG	160	POS	NEG	10	NEG	NEG	10	NEG	NEG	0.125	-3	2	1	2	1	0.0625	-4	16	4	1	0	BR
Beni	155.35	POS	320	POS	NEG	640	POS	POS	40	POS	NEG	10	NEG	NEG	0.5	-1	8	3	32	5	0.0625	-4	64	6	4	2	BR
Beni	1057.7	POS	640	POS	POS	320	POS	NEG	320	POS	NEG	20	POS	NEG	2	1	2	1	32	5	1	0	16	4	16	4	BP
Beni	8296.8	POS	2560	POS	POS	2560	POS	POS	5120	POS	POS	320	POS	NEG	1	0	0.5	-1	8	3	2	1	8	3	16	4	IN
Beni	184.53	POS	160	POS	NEG	80	POS	NEG	40	POS	NEG	20	POS	NEG	2	1	4	2	8	3	0.5	-1	4	2	2	1	BP
Beni	238.54	POS	160	POS	NEG	80	POS	NEG	80	POS	NEG	10	NEG	NEG	2	1	2	1	16	4	1	0	8	3	8	3	BP
Beni	272.24	POS	80	POS	NEG	40	POS	NEG	40	POS	NEG	10	NEG	NEG	2	1	2	1	8	3	1	0	4	2	4	2	BP
Beni	67.938	POS	40	POS	NEG	40	POS	NEG	10	NEG	NEG	10	NEG	NEG	1	0	4	2	4	2	0.25	-2	4	2	1	0	BP
Beni	873.54	POS	320	POS	NEG	640	POS	POS	160	POS	NEG	40	POS	NEG	0.5	-1	2	1	8	3	0.25	-2	16	4	4	2	BR
Beni	72.468	POS	80	POS	NEG	40	POS	NEG	40	POS	NEG	10	NEG	NEG	2	1	2	1	8	3	1	0	4	2	4	2	BP
Beni	41.079	POS	40	POS	NEG	40	POS	NEG	10	NEG	NEG	10	NEG	NEG	1	0	4	2	4	2	0.25	-2	4	2	1	0	BP
Beni	32	DOU	10	NEG	NEG	10	NEG	NEG	10	NEG	NEG	10	NEG	NEG	1	0	1	0	1	0	1	0	1	0	1	0	NEG
Beni	833.12	POS	80	POS	NEG	160	POS	NEG	40	POS	NEG	10	NEG	NEG	0.5	-1	2	1	8	3	0.25	-2	16	4	4	2	BR
Beni	147.07	POS	80	POS	NEG	40	POS	NEG	40	POS	NEG	10	NEG	NEG	2	1	2	1	8	3	1	0	4	2	4	2	BP
Beni	62.958	POS	20	POS	NEG	80	POS	NEG	10	NEG	NEG	10	NEG	NEG	0.25	-2	2	1	2	1	0.125	-3	8	3	1	0	BR
Beni	111.85	POS	160	POS	NEG	80	POS	NEG	40	POS	NEG	10	NEG	NEG	2	1	4	2	16	4	0.5	-1	8	3	4	2	BP
Beni	3813	POS	80	POS	NEG	40	POS	NEG	40	POS	NEG	10	NEG	NEG	2	1	2	1	8	3	1	0	4	2	4	2	BP
Beni	346.1	POS	80	POS	NEG	320	POS	NEG	40	POS	NEG	10	NEG	NEG	0.25	-2	2	1	8	3	0.125	-3	32	5	4	2	BR
Beni	369.69	POS	320	POS	NEG	640	POS	POS	40	POS	NEG	20	POS	NEG	0.5	-1	8	3	16	4	0.0625	-4	32	5	2	1	BR
Beni	50.307	POS	20	POS	NEG	10	NEG	NEG	10	NEG	NEG	10	NEG	NEG	2	1	2	1	2	1	1	0	1	0	1	0	BP
Beni	165.23	POS	80	POS	NEG	320	POS	NEG	40	POS	NEG	10	NEG	NEG	0.25	-2	2	1	8	3	0.125	-3	32	5	4	2	BR
Beni	518.83	POS	80	POS	NEG	160	POS	NEG	20	POS	NEG	10	NEG	NEG	0.5	-1	4	2	8	3	0.125	-3	16	4	2	1	BR
Beni	5044.4	POS	640	POS	POS	2560	POS	POS	320	POS	NEG	40	POS	NEG	0.25	-2	2	1	16	4	0.125	-3	64	6	8	3	BR
Beni	5.5753	NEG	NR	NEG	NEG	NR	NEG	NEG	NR	NEG	NEG	NR	NEG	NEG													NEG_ELISA
Beni	46.288	POS	40	POS	NEG	20	POS	NEG	20	POS	NEG	10	NEG	NEG	2	1	2	1	4	2	1	0	2	1	2	1	BP
Beni	1190.2	POS	160	POS	NEG	640	POS	POS	320	POS	NEG	40	POS	NEG	0.25	-2	0.5	-1	4	2	0.5	-1	16	4	8	3	BR
Beni	68.135	POS	80	POS	NEG	40	POS	NEG	10	NEG	NEG	10	NEG	NEG	2	1	8	3	8	3	0.25	-2	4	2	1	0	BP
Beni	62.66	POS	10	NEG	NEG	10	NEG	NEG	10	NEG	NEG	10	NEG	NEG	1	0	1	0	1	0	1	0	1	0	1	0	NEG
Beni	54.028	POS	40	POS	NEG	20	POS	NEG	20	POS	NEG	10	NEG	NEG	2	1	2	1	4	2	1	0	2	1	2	1	BP
Beni	9006.3	POS	2560	POS	POS	20480	POS	POS	2560	POS	POS	320	POS	NEG	0.125	-3	1	0	8	3	0.125	-3	64	6	8	3	BR
Beni	7.2082	NEG	NR	NEG	NEG	NR	NEG	NEG	NR	NEG	NEG	NR	NEG	NEG													NEG_ELISA
Beni	124.46	POS	160	POS	NEG	640	POS	POS	40	POS	NEG	20	POS	NEG	0.25	-2	4	2	8	3	0.0625	-4	32	5	2	1	BR
Beni	17.006	NEG	NR	NEG	NEG	NR	NEG	NEG	NR	NEG	NEG	NR	NEG	NEG													NEG_ELISA
Beni	58.94	POS	80	POS	NEG	160	POS	NEG	20	POS	NEG	10	NEG	NEG	0.5	-1	4	2	8	3	0.125	-3	16	4	2	1	BR
Beni	57.302	POS	20	POS	NEG	160	POS	NEG	10	NEG	NEG	10	NEG	NEG	0.125	-3	2	1	2	1	0.0625	-4	16	4	1	0	BR
Beni	172.58	POS	20	POS	NEG	80	POS	NEG	20	POS	NEG	10	NEG	NEG	0.25	-2	1	0	2	1	0.25	-2	8	3	2	1	BR
Beni	69.908	POS	20	POS	NEG	320	POS	NEG	10	NEG	NEG	10	NEG	NEG	0.0625	-4	2	1	2	1	0.03125	-5	32	5	1	0	BR
Beni	37.507	POS	40	POS	NEG	20	POS	NEG	20	POS	NEG	10	NEG	NEG	2	1	2	1	4	2	1	0	2	1	2	1	BP
Beni	6.1691	NEG	NR	NEG	NEG	NR	NEG	NEG	NR	NEG	NEG	NR	NEG	NEG													NEG_ELISA
Beni	10.771	NEG	NR	NEG	NEG	NR	NEG	NEG	NR	NEG	NEG	NR	NEG	NEG													NEG_ELISA
Beni	149.6	POS	80	POS	NEG	2560	POS	POS	40	POS	NEG	10	NEG	NEG	0.03125	-5	2	1	8	3	0.015625	-6	256	8	4	2	BR
Beni	41.079	POS	160	POS	NEG	40	POS	NEG	20	POS	NEG	10	NEG	NEG	4	2	8	3	16	4	0.5	-1	4	2	2	1	BP
Beni	66.363	POS	40	POS	NEG	80	POS	NEG	20	POS	NEG	10	NEG	NEG	0.5	-1	2	1	4	2	0.25	-2	8	3	2	1	BR
Beni	15.522	NEG	NR	NEG	NEG	NR	NEG	NEG	NR	NEG	NEG	NR	NEG	NEG													NEG_ELISA
Beni	41.674	POS	40	POS	NEG	320	POS	NEG	20	POS	NEG	10	NEG	NEG	0.125	-3	2	1	4	2	0.0625	-4	32	5	2	1	BR
Beni	103.19	POS	40	POS	NEG	80	POS	NEG	80	POS	NEG	10	NEG	NEG	0.5	-1	0.5	-1	4	2	1	0	8	3	8	3	BR
Beni	122.68	POS	80	POS	NEG	40	POS	NEG	20	POS	NEG	10	NEG	NEG	2	1	4	2	8	3	0.5	-1	4	2	2	1	BP
Beni	30.07	DOU	20	POS	NEG	40	POS	NEG	20	POS	NEG	10	NEG	NEG	0.5	-1	1	0	2	1	0.5	-1	4	2	2	1	BR
Beni	25.023	NEG	10	NEG	NEG	20	POS	NEG	10	NEG	NEG	10	NEG	NEG	0.5	-1	1	0	1	0	0.5	-1	2	1	1	0	NEG_ELISA
Beni	754.53	POS	320	POS	NEG	160	POS	NEG	80	POS	NEG	10	NEG	NEG	2	1	4	2	32	5	0.5	-1	16	4	8	3	BP
Beni	1669.3	POS	320	POS	NEG	1280	POS	POS	160	POS	NEG	20	POS	NEG	0.25	-2	2	1	16	4	0.125	-3	64	6	8	3	BR
Beni	331.41	POS	160	POS	NEG	160	POS	NEG	10	NEG	NEG	10	NEG	NEG	1	0	16	4	16	4	0.0625	-4	16	4	1	0	BP
Beni	5497.7	POS	1280	POS	POS	5120	POS	POS	2560	POS	POS	80	POS	NEG	0.25	-2	0.5	-1	16	4	0.5	-1	64	6	32	5	BR
Beni	33.191	DOU	40	POS	NEG	80	POS	NEG	10	NEG	NEG	10	NEG	NEG	0.5	-1	4	2	4	2	0.125	-3	8	3	1	0	BR
Beni	41.079	POS	20	POS	NEG	160	POS	NEG	10	NEG	NEG	10	NEG	NEG	0.125	-3	2	1	2	1	0.0625	-4	16	4	1	0	BR
Beni	848.84	POS	320	POS	NEG	640	POS	POS	320	POS	NEG	80	POS	NEG	0.5	-1	1	0	4	2	0.5	-1	8	3	4	2	BR
Beni	192.11	POS	320	POS	NEG	160	POS	NEG	80	POS	NEG	10	NEG	NEG	2	1	4	2	32	5	0.5	-1	16	4	8	3	BP
Beni	916.21	POS	640	POS	POS	2560	POS	POS	320	POS	NEG	80	POS	NEG	0.25	-2	2	1	8	3	0.125	-3	32	5	4	2	BR
Beni	66.363	POS	40	POS	NEG	20	POS	NEG	20	POS	NEG	10	NEG	NEG	2	1	2	1	4	2	1	0	2	1	2	1	BP
Beni	1037.5	POS	640	POS	POS	2560	POS	POS	320	POS	NEG	40	POS	NEG	0.25	-2	2	1	16	4	0.125	-3	64	6	8	3	BR
Beni	58.344	POS	20	POS	NEG	20	POS	NEG	40	POS	NEG	10	NEG	NEG	1	0	0.5	-1	2	1	2	1	2	1	4	2	IN
Beni	602.72	POS	80	POS	NEG	320	POS	NEG	40	POS	NEG	10	NEG	NEG	0.25	-2	2	1	8	3	0.125	-3	32	5	4	2	BR
Beni	184.07	POS	80	POS	NEG	160	POS	NEG	10	NEG	NEG	10	NEG	NEG	0.5	-1	8	3	8	3	0.0625	-4	16	4	1	0	BR
Beni	790.46	POS	160	POS	NEG	640	POS	POS	320	POS	NEG	10	NEG	NEG	0.25	-2	0.5	-1	16	4	0.5	-1	64	6	32	5	BR
Beni	1685.3	POS	320	POS	NEG	640	POS	POS	640	POS	POS	20	POS	NEG	0.5	-1	0.5	-1	16	4	1	0	32	5	32	5	BR
Beni	3.17	NEG	NR	NEG	NEG	NR	NEG	NEG	NR	NEG	NEG	NR	NEG	NEG													NEG_ELISA
Beni	138.11	POS	20	POS	NEG	40	POS	NEG	10	NEG	NEG	10	NEG	NEG	0.5	-1	2	1	2	1	0.25	-2	4	2	1	0	BR
Beni	5.2784	NEG	NR	NEG	NEG	NR	NEG	NEG	NR	NEG	NEG	NR	NEG	NEG													NEG_ELISA
Beni	111.85	POS	80	POS	NEG	40	POS	NEG	20	POS	NEG	10	NEG	NEG	2	1	4	2	8	3	0.5	-1	4	2	2	1	BP
Beni	374.33	POS	320	POS	NEG	160	POS	NEG	40	POS	NEG	10	NEG	NEG	2	1	8	3	32	5	0.25	-2	16	4	4	2	BP
Beni	33.637	DOU	10	NEG	NEG	40	POS	NEG	10	NEG	NEG	10	NEG	NEG	0.25	-2	1	0	1	0	0.25	-2	4	2	1	0	BR
Beni	192.57	POS	40	POS	NEG	160	POS	NEG	40	POS	NEG	10	NEG	NEG	0.25	-2	1	0	4	2	0.25	-2	16	4	4	2	BR
Beni	3.4969	NEG	NR	NEG	NEG	NR	NEG	NEG	NR	NEG	NEG	NR	NEG	NEG													NEG_ELISA
Beni	55.167	POS	80	POS	NEG	40	POS	NEG	10	NEG	NEG	10	NEG	NEG	2	1	8	3	8	3	0.25	-2	4	2	1	0	BP
Beni	100.05	POS	20	POS	NEG	40	POS	NEG	10	NEG	NEG	10	NEG	NEG	0.5	-1	2	1	2	1	0.25	-2	4	2	1	0	BR
Beni	39.833	POS	160	POS	NEG	20	POS	NEG	80	POS	NEG	10	NEG	NEG	8	3	2	1	16	4	4	2	2	1	8	3	BP
Beni	101.98	POS	80	POS	NEG	640	POS	POS	20	POS	NEG	10	NEG	NEG	0.125	-3	4	2	8	3	0.03125	-5	64	6	2	1	BR
Beni	77.301	POS	40	POS	NEG	80	POS	NEG	20	POS	NEG	10	NEG	NEG	0.5	-1	2	1	4	2	0.25	-2	8	3	2	1	BR
Beni	225.52	POS	80	POS	NEG	320	POS	NEG	80	POS	NEG	10	NEG	NEG	0.25	-2	1	0	8	3	0.25	-2	32	5	8	3	BR
Beni	302.07	POS	160	POS	NEG	1280	POS	POS	160	POS	NEG	10	NEG	NEG	0.125	-3	1	0	16	4	0.125	-3	128	7	16	4	BR
Beni	367.82	POS	160	POS	NEG	1280	POS	POS	160	POS	NEG	40	POS	NEG	0.125	-3	1	0	4	2	0.125	-3	32	5	4	2	BR
Beni	66.892	POS	320	POS	NEG	80	POS	NEG	40	POS	NEG	10	NEG	NEG	4	2	8	3	32	5	0.5	-1	8	3	4	2	BP
Beni	839.86	POS	320	POS	NEG	20480	POS	POS	320	POS	NEG	40	POS	NEG	0.015625	-6	1	0	8	3	0.015625	-6	512	9	8	3	BR
Beni	4083	POS	1280	POS	POS	1280	POS	POS	2560	POS	POS	640	POS	POS	1	0	0.5	-1	2	1	2	1	2	1	4	2	IN
Beni	283.43	POS	80	POS	NEG	20	POS	NEG	10	NEG	NEG	10	NEG	NEG	4	2	8	3	8	3	0.5	-1	2	1	1	0	BP
Beni	91.566	POS	80	POS	NEG	40	POS	NEG	40	POS	NEG	10	NEG	NEG	2	1	2	1	8	3	1	0	4	2	4	2	BP
Beni	1024	POS	320	POS	NEG	160	POS	NEG	160	POS	NEG	80	POS	NEG	2	1	2	1	4	2	1	0	2	1	2	1	BP
Beni	3690.6	POS	80	POS	NEG	320	POS	NEG	640	POS	POS	80	POS	NEG	0.25	-2	0.125	-3	1	0	2	1	4	2	8	3	IN
Beni	826.39	POS	320	POS	NEG	640	POS	POS	640	POS	POS	40	POS	NEG	0.5	-1	0.5	-1	8	3	1	0	16	4	16	4	BR
Beni	148.4	POS	320	POS	NEG	80	POS	NEG	80	POS	NEG	10	NEG	NEG	4	2	4	2	32	5	1	0	8	3	8	3	BP
Beni	33.167	DOU	10	NEG	NEG	10	NEG	NEG	10	NEG	NEG	10	NEG	NEG	1	0	1	0	1	0	1	0	1	0	1	0	NEG
Beni	97.735	POS	40	POS	NEG	160	POS	NEG	20	POS	NEG	10	NEG	NEG	0.25	-2	2	1	4	2	0.125	-3	16	4	2	1	BR
Beni	17.086	NEG	NR	NEG	NEG	NR	NEG	NEG	NR	NEG	NEG	NR	NEG	NEG													NEG_ELISA
Beni	340.4	POS	20	POS	NEG	20	POS	NEG	10	NEG	NEG	10	NEG	NEG	1	0	2	1	2	1	0.5	-1	2	1	1	0	BP
Beni	159.88	POS	640	POS	POS	320	POS	NEG	80	POS	NEG	10	NEG	NEG	2	1	8	3	64	6	0.25	-2	32	5	8	3	BP
Beni	5454.8	POS	2560	POS	POS	20480	POS	POS	1280	POS	POS	80	POS	NEG	0.125	-3	2	1	32	5	0.0625	-4	256	8	16	4	BR
Beni	32	DOU	10	NEG	NEG	10	NEG	NEG	10	NEG	NEG	10	NEG	NEG	1	0	1	0	1	0	1	0	1	0	1	0	NEG
Beni	86.361	POS	80	POS	NEG	20	POS	NEG	40	POS	NEG	10	NEG	NEG	4	2	2	1	8	3	2	1	2	1	4	2	BP
Beni	362.2	POS	640	POS	POS	320	POS	NEG	320	POS	NEG	20	POS	NEG	2	1	2	1	32	5	1	0	16	4	16	4	BP
Beni	248.73	POS	80	POS	NEG	320	POS	NEG	40	POS	NEG	20	POS	NEG	0.25	-2	2	1	4	2	0.125	-3	16	4	2	1	BR
Beni	68.241	POS	40	POS	NEG	80	POS	NEG	10	NEG	NEG	10	NEG	NEG	0.5	-1	4	2	4	2	0.125	-3	8	3	1	0	BR
Beni	123.76	POS	40	POS	NEG	160	POS	NEG	10	NEG	NEG	10	NEG	NEG	0.25	-2	4	2	4	2	0.0625	-4	16	4	1	0	BR
Beni	32	DOU	20	POS	NEG	10	NEG	NEG	10	NEG	NEG	10	NEG	NEG	2	1	2	1	2	1	1	0	1	0	1	0	BP
Beni	1178.9	POS	320	POS	NEG	1280	POS	POS	320	POS	NEG	80	POS	NEG	0.25	-2	1	0	4	2	0.25	-2	16	4	4	2	BR
Beni	1143	POS	160	POS	NEG	640	POS	POS	320	POS	NEG	40	POS	NEG	0.25	-2	0.5	-1	4	2	0.5	-1	16	4	8	3	BR
Beni	617.63	POS	80	POS	NEG	1280	POS	POS	320	POS	NEG	80	POS	NEG	0.0625	-4	0.25	-2	1	0	0.25	-2	16	4	4	2	BR
Beni	743.3	POS	160	POS	NEG	320	POS	NEG	320	POS	NEG	40	POS	NEG	0.5	-1	0.5	-1	4	2	1	0	8	3	8	3	BR
Beni	92.145	POS	80	POS	NEG	40	POS	NEG	40	POS	NEG	10	NEG	NEG	2	1	2	1	8	3	1	0	4	2	4	2	BP
Beni	74.602	POS	80	POS	NEG	320	POS	NEG	40	POS	NEG	10	NEG	NEG	0.25	-2	2	1	8	3	0.125	-3	32	5	4	2	BR
Beni	3837.6	POS	1280	POS	POS	2560	POS	POS	1280	POS	POS	40	POS	NEG	0.5	-1	1	0	32	5	0.5	-1	64	6	32	5	BR
Beni	279.21	POS	160	POS	NEG	640	POS	POS	80	POS	NEG	20	POS	NEG	0.25	-2	2	1	8	3	0.125	-3	32	5	4	2	BR
Beni	761.26	POS	320	POS	NEG	1280	POS	POS	160	POS	NEG	40	POS	NEG	0.25	-2	2	1	8	3	0.125	-3	32	5	4	2	BR
Beni	32.833	DOU	40	POS	NEG	20	POS	NEG	20	POS	NEG	10	NEG	NEG	2	1	2	1	4	2	1	0	2	1	2	1	BP
Beni	1621.3	POS	2560	POS	POS	1280	POS	POS	1280	POS	POS	40	POS	NEG	2	1	2	1	64	6	1	0	32	5	32	5	BP
Beni	248.5	POS	160	POS	NEG	80	POS	NEG	80	POS	NEG	20	POS	NEG	2	1	2	1	8	3	1	0	4	2	4	2	BP
Beni	138.55	POS	20	POS	NEG	80	POS	NEG	10	NEG	NEG	20	POS	NEG	0.25	-2	2	1	1	0	0.125	-3	4	2	0.5	-1	BR
Beni	62.167	POS	40	POS	NEG	40	POS	NEG	10	NEG	NEG	10	NEG	NEG	1	0	4	2	4	2	0.25	-2	4	2	1	0	BP
Beni	374.51	POS	40	POS	NEG	640	POS	POS	10	NEG	NEG	10	NEG	NEG	0.0625	-4	4	2	4	2	0.015625	-6	64	6	1	0	BR
Beni	58.833	POS	20	POS	NEG	80	POS	NEG	20	POS	NEG	10	NEG	NEG	0.25	-2	1	0	2	1	0.25	-2	8	3	2	1	BR
Beni	1293.3	POS	160	POS	NEG	640	POS	POS	160	POS	NEG	40	POS	NEG	0.25	-2	1	0	4	2	0.25	-2	16	4	4	2	BR
Beni	64.771	POS	20	POS	NEG	40	POS	NEG	10	NEG	NEG	10	NEG	NEG	0.5	-1	2	1	2	1	0.25	-2	4	2	1	0	BR
Beni	765.75	POS	320	POS	NEG	640	POS	POS	640	POS	POS	40	POS	NEG	0.5	-1	0.5	-1	8	3	1	0	16	4	16	4	BR
Beni	39.5	POS	80	POS	NEG	40	POS	NEG	40	POS	NEG	10	NEG	NEG	2	1	2	1	8	3	1	0	4	2	4	2	BP
Beni	52	POS	20	POS	NEG	160	POS	NEG	40	POS	NEG	10	NEG	NEG	0.125	-3	0.5	-1	2	1	0.25	-2	16	4	4	2	BR
Beni	1277.8	POS	320	POS	NEG	640	POS	POS	640	POS	POS	20	POS	NEG	0.5	-1	0.5	-1	16	4	1	0	32	5	32	5	BR
Beni	904.98	POS	640	POS	POS	1280	POS	POS	160	POS	NEG	20	POS	NEG	0.5	-1	4	2	32	5	0.125	-3	64	6	8	3	BR
Beni	604.58	POS	320	POS	NEG	640	POS	POS	320	POS	NEG	20	POS	NEG	0.5	-1	1	0	16	4	0.5	-1	32	5	16	4	BR
Beni	2032	POS	640	POS	POS	5120	POS	POS	640	POS	POS	80	POS	NEG	0.125	-3	1	0	8	3	0.125	-3	64	6	8	3	BR
Beni	716.35	POS	640	POS	POS	320	POS	NEG	320	POS	NEG	10	NEG	NEG	2	1	2	1	64	6	1	0	32	5	32	5	BP
Beni	11.257	NEG	NR	NEG	NEG	NR	NEG	NEG	NR	NEG	NEG	NR	NEG	NEG													NEG_ELISA
Beni	75.373	POS	160	POS	NEG	80	POS	NEG	40	POS	NEG	10	NEG	NEG	2	1	4	2	16	4	0.5	-1	8	3	4	2	BP
Beni	30.286	DOU	20	POS	NEG	40	POS	NEG	10	NEG	NEG	20	POS	NEG	0.5	-1	2	1	1	0	0.25	-2	2	1	0.5	-1	BR
Beni	2013.3	POS	320	POS	NEG	1280	POS	POS	160	POS	NEG	80	POS	NEG	0.25	-2	2	1	4	2	0.125	-3	16	4	2	1	BR
Beni	52.333	POS	40	POS	NEG	80	POS	NEG	20	POS	NEG	10	NEG	NEG	0.5	-1	2	1	4	2	0.25	-2	8	3	2	1	BR
Beni	808.42	POS	160	POS	NEG	640	POS	POS	160	POS	NEG	20	POS	NEG	0.25	-2	1	0	8	3	0.25	-2	32	5	8	3	BR
Beni	10.914	NEG	NR	NEG	NEG	NR	NEG	NEG	NR	NEG	NEG	NR	NEG	NEG													NEG_ELISA
Beni	222.48	POS	40	POS	NEG	1280	POS	POS	20	POS	NEG	10	NEG	NEG	0.03125	-5	2	1	4	2	0.015625	-6	128	7	2	1	BR
Beni	7.8286	NEG	NR	NEG	NEG	NR	NEG	NEG	NR	NEG	NEG	NR	NEG	NEG													NEG_ELISA
Beni	69.205	POS	160	POS	NEG	80	POS	NEG	40	POS	NEG	10	NEG	NEG	2	1	4	2	16	4	0.5	-1	8	3	4	2	BP
Beni	24.629	NEG	10	NEG	NEG	10	NEG	NEG	10	NEG	NEG	10	NEG	NEG	1	0	1	0	1	0	1	0	1	0	1	0	NEG_ELISA
Beni	296.44	POS	640	POS	POS	1280	POS	POS	160	POS	NEG	10	NEG	NEG	0.5	-1	4	2	64	6	0.125	-3	128	7	16	4	BR
Beni	123.76	POS	80	POS	NEG	160	POS	NEG	20	POS	NEG	10	NEG	NEG	0.5	-1	4	2	8	3	0.125	-3	16	4	2	1	BR
Beni	1226.1	POS	640	POS	POS	5120	POS	POS	320	POS	NEG	40	POS	NEG	0.125	-3	2	1	16	4	0.0625	-4	128	7	8	3	BR
Beni	42.333	POS	20	POS	NEG	160	POS	NEG	10	NEG	NEG	10	NEG	NEG	0.125	-3	2	1	2	1	0.0625	-4	16	4	1	0	BR
Beni	33.833	DOU	80	POS	NEG	160	POS	NEG	20	POS	NEG	10	NEG	NEG	0.5	-1	4	2	8	3	0.125	-3	16	4	2	1	BR
Beni	4.7429	NEG	NR	NEG	NEG	NR	NEG	NEG	NR	NEG	NEG	NR	NEG	NEG													NEG_ELISA
Beni	3.17	NEG	NR	NEG	NEG	NR	NEG	NEG	NR	NEG	NEG	NR	NEG	NEG													NEG_ELISA
Beni	77.301	POS	40	POS	NEG	20	POS	NEG	20	POS	NEG	10	NEG	NEG	2	1	2	1	4	2	1	0	2	1	2	1	BP
Beni	49.667	POS	10	NEG	NEG	40	POS	NEG	40	POS	NEG	10	NEG	NEG	0.25	-2	0.25	-2	1	0	1	0	4	2	4	2	BR
Beni	640	POS	40	POS	NEG	320	POS	NEG	10	NEG	NEG	10	NEG	NEG	0.125	-3	4	2	4	2	0.03125	-5	32	5	1	0	BR
Beni	224.82	POS	640	POS	POS	5120	POS	POS	320	POS	NEG	40	POS	NEG	0.125	-3	2	1	16	4	0.0625	-4	128	7	8	3	BR
Beni	146.29	POS	40	POS	NEG	160	POS	NEG	20	POS	NEG	10	NEG	NEG	0.25	-2	2	1	4	2	0.125	-3	16	4	2	1	BR
Beni	4.2286	NEG	NR	NEG	NEG	NR	NEG	NEG	NR	NEG	NEG	NR	NEG	NEG													NEG_ELISA
Beni	169.26	POS	40	POS	NEG	20	POS	NEG	10	NEG	NEG	10	NEG	NEG	2	1	4	2	4	2	0.5	-1	2	1	1	0	BP
Beni	2378.7	POS	320	POS	NEG	640	POS	POS	40	POS	NEG	10	NEG	NEG	0.5	-1	8	3	32	5	0.0625	-4	64	6	4	2	BR
Beni	93.108	POS	160	POS	NEG	80	POS	NEG	80	POS	NEG	10	NEG	NEG	2	1	2	1	16	4	1	0	8	3	8	3	BP
Beni	233.96	POS	80	POS	NEG	320	POS	NEG	160	POS	NEG	10	NEG	NEG	0.25	-2	0.5	-1	8	3	0.5	-1	32	5	16	4	BR
Beni	91.181	POS	10	NEG	NEG	10	NEG	NEG	10	NEG	NEG	10	NEG	NEG	1	0	1	0	1	0	1	0	1	0	1	0	NEG
Beni	2585.2	POS	160	POS	NEG	640	POS	POS	40	POS	NEG	20	POS	NEG	0.25	-2	4	2	8	3	0.0625	-4	32	5	2	1	BR
Beni	963.37	POS	640	POS	POS	2560	POS	POS	160	POS	NEG	40	POS	NEG	0.25	-2	4	2	16	4	0.0625	-4	64	6	4	2	BR
Beni	1192.4	POS	320	POS	NEG	640	POS	POS	160	POS	NEG	20	POS	NEG	0.5	-1	2	1	16	4	0.25	-2	32	5	8	3	BR
Beni	2956.1	POS	320	POS	NEG	5120	POS	POS	2560	POS	POS	160	POS	NEG	0.0625	-4	0.125	-3	2	1	0.5	-1	32	5	16	4	BR
Beni	53.895	POS	80	POS	NEG	40	POS	NEG	20	POS	NEG	10	NEG	NEG	2	1	4	2	8	3	0.5	-1	4	2	2	1	BP
Beni	781.47	POS	80	POS	NEG	320	POS	NEG	160	POS	NEG	20	POS	NEG	0.25	-2	0.5	-1	4	2	0.5	-1	16	4	8	3	BR
Beni	853.33	POS	160	POS	NEG	640	POS	POS	80	POS	NEG	40	POS	NEG	0.25	-2	2	1	4	2	0.125	-3	16	4	2	1	BR
Beni	3.318	NEG	NR	NEG	NEG	NR	NEG	NEG	NR	NEG	NEG	NR	NEG	NEG													NEG_ELISA
Beni	14.059	NEG	NR	NEG	NEG	NR	NEG	NEG	NR	NEG	NEG	NR	NEG	NEG													NEG_ELISA
Beni	278.65	POS	40	POS	NEG	320	POS	NEG	10	NEG	NEG	10	NEG	NEG	0.125	-3	4	2	4	2	0.03125	-5	32	5	1	0	BR
Beni	143.53	POS	80	POS	NEG	40	POS	NEG	20	POS	NEG	10	NEG	NEG	2	1	4	2	8	3	0.5	-1	4	2	2	1	BP
Beni	11.816	NEG	NR	NEG	NEG	NR	NEG	NEG	NR	NEG	NEG	NR	NEG	NEG													NEG_ELISA
Beni	33.444	DOU	20	POS	NEG	10	NEG	NEG	20	POS	NEG	10	NEG	NEG	2	1	1	0	2	1	2	1	1	0	2	1	BP
Beni	7659.4	POS	2560	POS	POS	1280	POS	POS	2560	POS	POS	640	POS	POS	2	1	1	0	4	2	2	1	2	1	4	2	BP
Beni	1778.7	POS	1280	POS	POS	640	POS	POS	640	POS	POS	40	POS	NEG	2	1	2	1	32	5	1	0	16	4	16	4	BP
Beni	1925.3	POS	320	POS	NEG	5120	POS	POS	320	POS	NEG	80	POS	NEG	0.0625	-4	1	0	4	2	0.0625	-4	64	6	4	2	BR
Beni	45.474	POS	40	POS	NEG	20	POS	NEG	20	POS	NEG	10	NEG	NEG	2	1	2	1	4	2	1	0	2	1	2	1	BP
Beni	2461.3	POS	2560	POS	POS	5120	POS	POS	640	POS	POS	80	POS	NEG	0.5	-1	4	2	32	5	0.125	-3	64	6	8	3	BR
Beni	62.316	POS	40	POS	NEG	160	POS	NEG	10	NEG	NEG	10	NEG	NEG	0.25	-2	4	2	4	2	0.0625	-4	16	4	1	0	BR
Beni	5944.1	POS	2560	POS	POS	2560	POS	POS	5120	POS	POS	320	POS	NEG	1	0	0.5	-1	8	3	2	1	8	3	16	4	IN
Beni	204.09	POS	160	POS	NEG	320	POS	NEG	40	POS	NEG	20	POS	NEG	0.5	-1	4	2	8	3	0.125	-3	16	4	2	1	BR
Beni	3909.8	POS	1280	POS	POS	5120	POS	POS	2560	POS	POS	80	POS	NEG	0.25	-2	0.5	-1	16	4	0.5	-1	64	6	32	5	BR
Beni	41.504	POS	20	POS	NEG	80	POS	NEG	10	NEG	NEG	10	NEG	NEG	0.25	-2	2	1	2	1	0.125	-3	8	3	1	0	BR
Beni	22232	POS	5120	POS	POS	10240	POS	POS	5120	POS	POS	320	POS	NEG	0.5	-1	1	0	16	4	0.5	-1	32	5	16	4	BR
Beni	2085.2	POS	1280	POS	POS	5120	POS	POS	640	POS	POS	160	POS	NEG	0.25	-2	2	1	8	3	0.125	-3	32	5	4	2	BR
Beni	27.279	DOU	40	POS	NEG	80	POS	NEG	20	POS	NEG	10	NEG	NEG	0.5	-1	2	1	4	2	0.25	-2	8	3	2	1	BR
Beni	125.92	POS	160	POS	NEG	80	POS	NEG	40	POS	NEG	10	NEG	NEG	2	1	4	2	16	4	0.5	-1	8	3	4	2	BP
Beni	116.71	POS	80	POS	NEG	160	POS	NEG	40	POS	NEG	10	NEG	NEG	0.5	-1	2	1	8	3	0.25	-2	16	4	4	2	BR
Beni	38.737	POS	20	POS	NEG	40	POS	NEG	20	POS	NEG	10	NEG	NEG	0.5	-1	1	0	2	1	0.5	-1	4	2	2	1	BR
Beni	8.9836	NEG	NR	NEG	NEG	NR	NEG	NEG	NR	NEG	NEG	NR	NEG	NEG													NEG_ELISA
Beni	211.56	POS	80	POS	NEG	320	POS	NEG	80	POS	NEG	10	NEG	NEG	0.25	-2	1	0	8	3	0.25	-2	32	5	8	3	BR
Beni	3.04	NEG	NR	NEG	NEG	NR	NEG	NEG	NR	NEG	NEG	NR	NEG	NEG													NEG_ELISA
Beni	38.135	POS	20	POS	NEG	10	NEG	NEG	40	POS	NEG	10	NEG	NEG	2	1	0.5	-1	2	1	4	2	1	0	4	2	IN
Beni	3.16	NEG	NR	NEG	NEG	NR	NEG	NEG	NR	NEG	NEG	NR	NEG	NEG													NEG_ELISA
Beni	136.06	POS	80	POS	NEG	160	POS	NEG	40	POS	NEG	10	NEG	NEG	0.5	-1	2	1	8	3	0.25	-2	16	4	4	2	BR
Beni	64.742	POS	80	POS	NEG	40	POS	NEG	20	POS	NEG	10	NEG	NEG	2	1	4	2	8	3	0.5	-1	4	2	2	1	BP
Beni	3452.2	POS	320	POS	NEG	640	POS	POS	320	POS	NEG	20	POS	NEG	0.5	-1	1	0	16	4	0.5	-1	32	5	16	4	BR
Beni	19.607	NEG	NR	NEG	NEG	NR	NEG	NEG	NR	NEG	NEG	NR	NEG	NEG													NEG_ELISA
Beni	250.69	POS	80	POS	NEG	320	POS	NEG	320	POS	NEG	10	NEG	NEG	0.25	-2	0.25	-2	8	3	1	0	32	5	32	5	BR
Beni	97.114	POS	40	POS	NEG	640	POS	POS	20	POS	NEG	10	NEG	NEG	0.0625	-4	2	1	4	2	0.03125	-5	64	6	2	1	BR
Beni	38.977	POS	20	POS	NEG	20	POS	NEG	10	NEG	NEG	10	NEG	NEG	1	0	2	1	2	1	0.5	-1	2	1	1	0	BP
Beni	374.99	POS	320	POS	NEG	320	POS	NEG	640	POS	POS	20	POS	NEG	1	0	0.5	-1	16	4	2	1	16	4	32	5	IN
Beni	3.11	NEG	NR	NEG	NEG	NR	NEG	NEG	NR	NEG	NEG	NR	NEG	NEG													NEG_ELISA
Beni	17.6	NEG	NR	NEG	NEG	NR	NEG	NEG	NR	NEG	NEG	NR	NEG	NEG													NEG_ELISA
Beni	78.107	POS	20	POS	NEG	40	POS	NEG	20	POS	NEG	10	NEG	NEG	0.5	-1	1	0	2	1	0.5	-1	4	2	2	1	BR
Beni	207.43	POS	40	POS	NEG	320	POS	NEG	80	POS	NEG	10	NEG	NEG	0.125	-3	0.5	-1	4	2	0.25	-2	32	5	8	3	BR
Beni	127.26	POS	80	POS	NEG	40	POS	NEG	20	POS	NEG	10	NEG	NEG	2	1	4	2	8	3	0.5	-1	4	2	2	1	BP
Beni	7060.6	POS	2560	POS	POS	5120	POS	POS	1280	POS	POS	160	POS	NEG	0.5	-1	2	1	16	4	0.25	-2	32	5	8	3	BR
Beni	5.7967	NEG	NR	NEG	NEG	NR	NEG	NEG	NR	NEG	NEG	NR	NEG	NEG													NEG_ELISA
Beni	13.469	NEG	NR	NEG	NEG	NR	NEG	NEG	NR	NEG	NEG	NR	NEG	NEG													NEG_ELISA
Beni	7.8033	NEG	NR	NEG	NEG	NR	NEG	NEG	NR	NEG	NEG	NR	NEG	NEG													NEG_ELISA
Beni	4.0262	NEG	NR	NEG	NEG	NR	NEG	NEG	NR	NEG	NEG	NR	NEG	NEG													NEG_ELISA
Beni	44.271	POS	20	POS	NEG	160	POS	NEG	20	POS	NEG	10	NEG	NEG	0.125	-3	1	0	2	1	0.125	-3	16	4	2	1	BR
Beni	35.609	POS	20	POS	NEG	80	POS	NEG	10	NEG	NEG	10	NEG	NEG	0.25	-2	2	1	2	1	0.125	-3	8	3	1	0	BR
Beni	12177	POS	5120	POS	POS	10240	POS	POS	20480	POS	POS	640	POS	POS	0.5	-1	0.25	-2	8	3	2	1	16	4	32	5	IN
Beni	45.233	POS	20	POS	NEG	10	NEG	NEG	10	NEG	NEG	10	NEG	NEG	2	1	2	1	2	1	1	0	1	0	1	0	BP
Beni	10816	POS	2560	POS	POS	5120	POS	POS	5120	POS	POS	320	POS	NEG	0.5	-1	0.5	-1	8	3	1	0	16	4	16	4	BR
Beni	118.94	POS	80	POS	NEG	160	POS	NEG	40	POS	NEG	10	NEG	NEG	0.5	-1	2	1	8	3	0.25	-2	16	4	4	2	BR
Beni	208.02	POS	160	POS	NEG	320	POS	NEG	80	POS	NEG	40	POS	NEG	0.5	-1	2	1	4	2	0.25	-2	8	3	2	1	BR
Beni	52.451	POS	80	POS	NEG	40	POS	NEG	10	NEG	NEG	10	NEG	NEG	2	1	8	3	8	3	0.25	-2	4	2	1	0	BP
Beni	1687.4	POS	640	POS	POS	5120	POS	POS	1280	POS	POS	40	POS	NEG	0.125	-3	0.5	-1	16	4	0.25	-2	128	7	32	5	BR
Beni	1239.8	POS	160	POS	NEG	320	POS	NEG	160	POS	NEG	20	POS	NEG	0.5	-1	1	0	8	3	0.5	-1	16	4	8	3	BR
Beni	123.4	POS	40	POS	NEG	320	POS	NEG	40	POS	NEG	10	NEG	NEG	0.125	-3	1	0	4	2	0.125	-3	32	5	4	2	BR
Beni	139.6	POS	160	POS	NEG	80	POS	NEG	40	POS	NEG	10	NEG	NEG	2	1	4	2	16	4	0.5	-1	8	3	4	2	BP
Beni	2078.8	POS	640	POS	POS	1280	POS	POS	640	POS	POS	20	POS	NEG	0.5	-1	1	0	32	5	0.5	-1	64	6	32	5	BR
Beni	87.016	POS	10	NEG	NEG	160	POS	NEG	10	NEG	NEG	10	NEG	NEG	0.0625	-4	1	0	1	0	0.0625	-4	16	4	1	0	BR
Beni	104.98	POS	160	POS	NEG	80	POS	NEG	40	POS	NEG	10	NEG	NEG	2	1	4	2	16	4	0.5	-1	8	3	4	2	BP
Beni	151.2	POS	320	POS	NEG	640	POS	POS	160	POS	NEG	10	NEG	NEG	0.5	-1	2	1	32	5	0.25	-2	64	6	16	4	BR
Beni	2793.5	POS	640	POS	POS	10240	POS	POS	1280	POS	POS	80	POS	NEG	0.0625	-4	0.5	-1	8	3	0.125	-3	128	7	16	4	BR
Beni	218.25	POS	160	POS	NEG	1280	POS	POS	80	POS	NEG	10	NEG	NEG	0.125	-3	2	1	16	4	0.0625	-4	128	7	8	3	BR
Beni	4302.8	POS	640	POS	POS	1280	POS	POS	640	POS	POS	80	POS	NEG	0.5	-1	1	0	8	3	0.5	-1	16	4	8	3	BR
Beni	11193	POS	2560	POS	POS	10240	POS	POS	5120	POS	POS	160	POS	NEG	0.25	-2	0.5	-1	16	4	0.5	-1	64	6	32	5	BR
Beni	7579.7	POS	1280	POS	POS	10240	POS	POS	5120	POS	POS	80	POS	NEG	0.125	-3	0.25	-2	16	4	0.5	-1	128	7	64	6	BR
Beni	1366	POS	320	POS	NEG	640	POS	POS	640	POS	POS	80	POS	NEG	0.5	-1	0.5	-1	4	2	1	0	8	3	8	3	BR
Beni	58.466	POS	80	POS	NEG	40	POS	NEG	40	POS	NEG	10	NEG	NEG	2	1	2	1	8	3	1	0	4	2	4	2	BP
Beni	51.248	POS	20	POS	NEG	80	POS	NEG	10	NEG	NEG	10	NEG	NEG	0.25	-2	2	1	2	1	0.125	-3	8	3	1	0	BR
Beni	32.722	DOU	10	NEG	NEG	20	POS	NEG	10	NEG	NEG	10	NEG	NEG	0.5	-1	1	0	1	0	0.5	-1	2	1	1	0	BR
Beni	964.02	POS	640	POS	POS	640	POS	POS	1280	POS	POS	40	POS	NEG	1	0	0.5	-1	16	4	2	1	16	4	32	5	IN
Beni	44.03	POS	40	POS	NEG	80	POS	NEG	10	NEG	NEG	10	NEG	NEG	0.5	-1	4	2	4	2	0.125	-3	8	3	1	0	BR
Beni	25.39	NEG	20	POS	NEG	40	POS	NEG	20	POS	NEG	10	NEG	NEG	0.5	-1	1	0	2	1	0.5	-1	4	2	2	1	NEG_ELISA
Beni	2149.4	POS	1280	POS	POS	640	POS	POS	640	POS	POS	40	POS	NEG	2	1	2	1	32	5	1	0	16	4	16	4	BP
Beni	31.646	DOU	40	POS	NEG	80	POS	NEG	10	NEG	NEG	10	NEG	NEG	0.5	-1	4	2	4	2	0.125	-3	8	3	1	0	BR
Beni	6671.3	POS	2560	POS	POS	1280	POS	POS	1280	POS	POS	80	POS	NEG	2	1	2	1	32	5	1	0	16	4	16	4	BP
Beni	37.293	POS	10	NEG	NEG	10	NEG	NEG	10	NEG	NEG	10	NEG	NEG	1	0	1	0	1	0	1	0	1	0	1	0	NEG
Beni	16.066	NEG	NR	NEG	NEG	NR	NEG	NEG	NR	NEG	NEG	NR	NEG	NEG													NEG_ELISA
Beni	41.504	POS	20	POS	NEG	40	POS	NEG	20	POS	NEG	10	NEG	NEG	0.5	-1	1	0	2	1	0.5	-1	4	2	2	1	BR
Beni	1405.1	POS	640	POS	POS	1280	POS	POS	640	POS	POS	80	POS	NEG	0.5	-1	1	0	8	3	0.5	-1	16	4	8	3	BR
Beni	21.023	NEG	NR	NEG	NEG	NR	NEG	NEG	NR	NEG	NEG	NR	NEG	NEG													NEG_ELISA
Beni	3.13	NEG	NR	NEG	NEG	NR	NEG	NEG	NR	NEG	NEG	NR	NEG	NEG													NEG_ELISA
Beni	362.17	POS	640	POS	POS	160	POS	NEG	320	POS	NEG	10	NEG	NEG	4	2	2	1	64	6	2	1	16	4	32	5	BP
Beni	1408.3	POS	160	POS	NEG	320	POS	NEG	160	POS	NEG	10	NEG	NEG	0.5	-1	1	0	16	4	0.5	-1	32	5	16	4	BR
Beni	91.771	POS	40	POS	NEG	160	POS	NEG	20	POS	NEG	10	NEG	NEG	0.25	-2	2	1	4	2	0.125	-3	16	4	2	1	BR
Beni	2492.6	POS	320	POS	NEG	2560	POS	POS	640	POS	POS	40	POS	NEG	0.125	-3	0.5	-1	8	3	0.25	-2	64	6	16	4	BR
Beni	1520.6	POS	320	POS	NEG	640	POS	POS	640	POS	POS	10	NEG	NEG	0.5	-1	0.5	-1	32	5	1	0	64	6	64	6	BR
Beni	101.03	POS	10	NEG	NEG	160	POS	NEG	10	NEG	NEG	10	NEG	NEG	0.0625	-4	1	0	1	0	0.0625	-4	16	4	1	0	BR
Beni	275.43	POS	640	POS	POS	2560	POS	POS	320	POS	NEG	20	POS	NEG	0.25	-2	2	1	32	5	0.125	-3	128	7	16	4	BR
Beni	5179	POS	2560	POS	POS	20480	POS	POS	2560	POS	POS	320	POS	NEG	0.125	-3	1	0	8	3	0.125	-3	64	6	8	3	BR
Beni	2568.3	POS	2560	POS	POS	1280	POS	POS	1280	POS	POS	40	POS	NEG	2	1	2	1	64	6	1	0	32	5	32	5	BP
Beni	1012.2	POS	80	POS	NEG	1280	POS	POS	40	POS	NEG	10	NEG	NEG	0.0625	-4	2	1	8	3	0.03125	-5	128	7	4	2	BR
Beni	7432.3	POS	5120	POS	POS	20480	POS	POS	1280	POS	POS	160	POS	NEG	0.25	-2	4	2	32	5	0.0625	-4	128	7	8	3	BR
Beni	112.84	POS	20	POS	NEG	40	POS	NEG	10	NEG	NEG	10	NEG	NEG	0.5	-1	2	1	2	1	0.25	-2	4	2	1	0	BR
Beni	3.09	NEG	NR	NEG	NEG	NR	NEG	NEG	NR	NEG	NEG	NR	NEG	NEG													NEG_ELISA
Beni	358.71	POS	80	POS	NEG	2560	POS	POS	20	POS	NEG	10	NEG	NEG	0.03125	-5	4	2	8	3	0.0078125	-7	256	8	2	1	BR
Beni	22.239	NEG	10	NEG	NEG	10	NEG	NEG	10	NEG	NEG	10	NEG	NEG	1	0	1	0	1	0	1	0	1	0	1	0	NEG_ELISA
Beni	23.083	NEG	40	POS	NEG	20	POS	NEG	20	POS	NEG	10	NEG	NEG	2	1	2	1	4	2	1	0	2	1	2	1	NEG_ELISA
Beni	42.667	POS	40	POS	NEG	80	POS	NEG	40	POS	NEG	10	NEG	NEG	0.5	-1	1	0	4	2	0.5	-1	8	3	4	2	BR
Beni	3998.4	POS	640	POS	POS	2560	POS	POS	640	POS	POS	80	POS	NEG	0.25	-2	1	0	8	3	0.25	-2	32	5	8	3	BR
Beni	73.097	POS	10	NEG	NEG	10	NEG	NEG	10	NEG	NEG	10	NEG	NEG	1	0	1	0	1	0	1	0	1	0	1	0	NEG
Beni	7391	POS	640	POS	POS	5120	POS	POS	2560	POS	POS	40	POS	NEG	0.125	-3	0.25	-2	16	4	0.5	-1	128	7	64	6	BR
Beni	6889.6	POS	2560	POS	POS	20480	POS	POS	2560	POS	POS	320	POS	NEG	0.125	-3	1	0	8	3	0.125	-3	64	6	8	3	BR
Beni	84.429	POS	160	POS	NEG	80	POS	NEG	80	POS	NEG	10	NEG	NEG	2	1	2	1	16	4	1	0	8	3	8	3	BP
Beni	226.85	POS	160	POS	NEG	640	POS	POS	160	POS	NEG	40	POS	NEG	0.25	-2	1	0	4	2	0.25	-2	16	4	4	2	BR
Beni	97.835	POS	320	POS	NEG	1280	POS	POS	80	POS	NEG	10	NEG	NEG	0.25	-2	4	2	32	5	0.0625	-4	128	7	8	3	BR
Beni	90.813	POS	40	POS	NEG	320	POS	NEG	160	POS	NEG	10	NEG	NEG	0.125	-3	0.25	-2	4	2	0.5	-1	32	5	16	4	BR
Beni	171.83	POS	80	POS	NEG	160	POS	NEG	80	POS	NEG	10	NEG	NEG	0.5	-1	1	0	8	3	0.5	-1	16	4	8	3	BR
Beni	25.854	DOU	10	NEG	NEG	10	NEG	NEG	10	NEG	NEG	10	NEG	NEG	1	0	1	0	1	0	1	0	1	0	1	0	NEG
Beni	10.43	NEG	NR	NEG	NEG	NR	NEG	NEG	NR	NEG	NEG	NR	NEG	NEG													NEG_ELISA
Beni	2101.3	POS	640	POS	POS	1280	POS	POS	640	POS	POS	80	POS	NEG	0.5	-1	1	0	8	3	0.5	-1	16	4	8	3	BR
Beni	111.56	POS	40	POS	NEG	160	POS	NEG	10	NEG	NEG	10	NEG	NEG	0.25	-2	4	2	4	2	0.0625	-4	16	4	1	0	BR
Beni	2885.2	POS	640	POS	POS	20480	POS	POS	640	POS	POS	40	POS	NEG	0.03125	-5	1	0	16	4	0.03125	-5	512	9	16	4	BR
Beni	3.07	NEG	NR	NEG	NEG	NR	NEG	NEG	NR	NEG	NEG	NR	NEG	NEG													NEG_ELISA
Beni	88.738	POS	80	POS	NEG	80	POS	NEG	160	POS	NEG	10	NEG	NEG	1	0	0.5	-1	8	3	2	1	8	3	16	4	IN
Beni	195.96	POS	320	POS	NEG	160	POS	NEG	160	POS	NEG	40	POS	NEG	2	1	2	1	8	3	1	0	4	2	4	2	BP
Beni	20.191	NEG	NR	NEG	NEG	NR	NEG	NEG	NR	NEG	NEG	NR	NEG	NEG													NEG_ELISA
Beni	155.61	POS	160	POS	NEG	160	POS	NEG	320	POS	NEG	10	NEG	NEG	1	0	0.5	-1	16	4	2	1	16	4	32	5	IN
Beni	147.11	POS	40	POS	NEG	160	POS	NEG	80	POS	NEG	10	NEG	NEG	0.25	-2	0.5	-1	4	2	0.5	-1	16	4	8	3	BR
Beni	36.904	POS	10	NEG	NEG	10	NEG	NEG	10	NEG	NEG	10	NEG	NEG	1	0	1	0	1	0	1	0	1	0	1	0	NEG
Beni	1677.8	POS	640	POS	POS	1280	POS	POS	640	POS	POS	20	POS	NEG	0.5	-1	1	0	32	5	0.5	-1	64	6	32	5	BR
Beni	5414.9	POS	1280	POS	POS	640	POS	POS	640	POS	POS	20	POS	NEG	2	1	2	1	64	6	1	0	32	5	32	5	BP
Beni	3.2	NEG	NR	NEG	NEG	NR	NEG	NEG	NR	NEG	NEG	NR	NEG	NEG													NEG_ELISA
Beni	3.07	NEG	NR	NEG	NEG	NR	NEG	NEG	NR	NEG	NEG	NR	NEG	NEG													NEG_ELISA
Beni	126.56	POS	160	POS	NEG	320	POS	NEG	160	POS	NEG	10	NEG	NEG	0.5	-1	1	0	16	4	0.5	-1	32	5	16	4	BR
Beni	3.8025	NEG	NR	NEG	NEG	NR	NEG	NEG	NR	NEG	NEG	NR	NEG	NEG													NEG_ELISA
Beni	34.943	DOU	10	NEG	NEG	10	NEG	NEG	10	NEG	NEG	10	NEG	NEG	1	0	1	0	1	0	1	0	1	0	1	0	NEG
Beni	45.732	POS	20	POS	NEG	40	POS	NEG	40	POS	NEG	10	NEG	NEG	0.5	-1	0.5	-1	2	1	1	0	4	2	4	2	BR
Beni	74.055	POS	20	POS	NEG	320	POS	NEG	10	NEG	NEG	10	NEG	NEG	0.0625	-4	2	1	2	1	0.03125	-5	32	5	1	0	BR
Beni	244.8	POS	320	POS	NEG	160	POS	NEG	40	POS	NEG	10	NEG	NEG	2	1	8	3	32	5	0.25	-2	16	4	4	2	BP
Beni	6907.3	POS	2560	POS	POS	10240	POS	POS	5120	POS	POS	160	POS	NEG	0.25	-2	0.5	-1	16	4	0.5	-1	64	6	32	5	BR
Beni	48.552	POS	160	POS	NEG	80	POS	NEG	20	POS	NEG	10	NEG	NEG	2	1	8	3	16	4	0.25	-2	8	3	2	1	BP
Beni	196.15	POS	80	POS	NEG	320	POS	NEG	80	POS	NEG	20	POS	NEG	0.25	-2	1	0	4	2	0.25	-2	16	4	4	2	BR
Beni	1132.7	POS	320	POS	NEG	1280	POS	POS	320	POS	NEG	40	POS	NEG	0.25	-2	1	0	8	3	0.25	-2	32	5	8	3	BR
Beni	8108.6	POS	1280	POS	POS	10240	POS	POS	640	POS	POS	160	POS	NEG	0.125	-3	2	1	8	3	0.0625	-4	64	6	4	2	BR
Beni	7746.6	POS	2560	POS	POS	2560	POS	POS	5120	POS	POS	80	POS	NEG	1	0	0.5	-1	32	5	2	1	32	5	64	6	IN
Beni	3.11	NEG	NR	NEG	NEG	NR	NEG	NEG	NR	NEG	NEG	NR	NEG	NEG													NEG_ELISA
Beni	1385.9	POS	320	POS	NEG	1280	POS	POS	2560	POS	POS	160	POS	NEG	0.25	-2	0.125	-3	2	1	2	1	8	3	16	4	IN
Beni	51.985	POS	40	POS	NEG	80	POS	NEG	40	POS	NEG	10	NEG	NEG	0.5	-1	1	0	4	2	0.5	-1	8	3	4	2	BR
Beni	19.709	NEG	NR	NEG	NEG	NR	NEG	NEG	NR	NEG	NEG	NR	NEG	NEG													NEG_ELISA
Beni	135.14	POS	20	POS	NEG	320	POS	NEG	40	POS	NEG	10	NEG	NEG	0.0625	-4	0.5	-1	2	1	0.125	-3	32	5	4	2	BR
Beni	3.07	NEG	NR	NEG	NEG	NR	NEG	NEG	NR	NEG	NEG	NR	NEG	NEG													NEG_ELISA
Beni	29.951	DOU	40	POS	NEG	40	POS	NEG	10	NEG	NEG	10	NEG	NEG	1	0	4	2	4	2	0.25	-2	4	2	1	0	BP
Beni	3	NEG	NR	NEG	NEG	NR	NEG	NEG	NR	NEG	NEG	NR	NEG	NEG													NEG_ELISA
Beni	51.985	POS	40	POS	NEG	20	POS	NEG	20	POS	NEG	10	NEG	NEG	2	1	2	1	4	2	1	0	2	1	2	1	BP
Beni	283.45	POS	320	POS	NEG	640	POS	POS	320	POS	NEG	40	POS	NEG	0.5	-1	1	0	8	3	0.5	-1	16	4	8	3	BR
Beni	13.081	NEG	NR	NEG	NEG	NR	NEG	NEG	NR	NEG	NEG	NR	NEG	NEG													NEG_ELISA
Beni	85.387	POS	320	POS	NEG	160	POS	NEG	40	POS	NEG	10	NEG	NEG	2	1	8	3	32	5	0.25	-2	16	4	4	2	BP
Beni	97.995	POS	160	POS	NEG	320	POS	NEG	80	POS	NEG	10	NEG	NEG	0.5	-1	2	1	16	4	0.25	-2	32	5	8	3	BR
Beni	157.54	POS	20	POS	NEG	640	POS	POS	10	NEG	NEG	10	NEG	NEG	0.03125	-5	2	1	2	1	0.015625	-6	64	6	1	0	BR
Beni	3.11	NEG	NR	NEG	NEG	NR	NEG	NEG	NR	NEG	NEG	NR	NEG	NEG													NEG_ELISA
Beni	158.31	POS	640	POS	POS	320	POS	NEG	80	POS	NEG	10	NEG	NEG	2	1	8	3	64	6	0.25	-2	32	5	8	3	BP
Beni	217.19	POS	320	POS	NEG	640	POS	POS	640	POS	POS	10	NEG	NEG	0.5	-1	0.5	-1	32	5	1	0	64	6	64	6	BR
Beni	3.07	NEG	NR	NEG	NEG	NR	NEG	NEG	NR	NEG	NEG	NR	NEG	NEG													NEG_ELISA
Beni	2901.9	POS	1280	POS	POS	10240	POS	POS	1280	POS	POS	160	POS	NEG	0.125	-3	1	0	8	3	0.125	-3	64	6	8	3	BR
Beni	1995.4	POS	1280	POS	POS	2560	POS	POS	320	POS	NEG	40	POS	NEG	0.5	-1	4	2	32	5	0.125	-3	64	6	8	3	BR
Beni	234.38	POS	20	POS	NEG	80	POS	NEG	20	POS	NEG	10	NEG	NEG	0.25	-2	1	0	2	1	0.25	-2	8	3	2	1	BR
Beni	32.736	DOU	160	POS	NEG	20	POS	NEG	40	POS	NEG	10	NEG	NEG	8	3	4	2	16	4	2	1	2	1	4	2	BP
Beni	57.379	POS	160	POS	NEG	80	POS	NEG	40	POS	NEG	10	NEG	NEG	2	1	4	2	16	4	0.5	-1	8	3	4	2	BP
Beni	31.879	DOU	20	POS	NEG	20	POS	NEG	10	NEG	NEG	10	NEG	NEG	1	0	2	1	2	1	0.5	-1	2	1	1	0	BP
Beni	5945.8	POS	2560	POS	POS	10240	POS	POS	5120	POS	POS	80	POS	NEG	0.25	-2	0.5	-1	32	5	0.5	-1	128	7	64	6	BR
Beni	154.64	POS	160	POS	NEG	320	POS	NEG	20	POS	NEG	20	POS	NEG	0.5	-1	8	3	8	3	0.0625	-4	16	4	1	0	BR
Beni	16.335	NEG	NR	NEG	NEG	NR	NEG	NEG	NR	NEG	NEG	NR	NEG	NEG													NEG_ELISA
Beni	54.559	POS	160	POS	NEG	80	POS	NEG	80	POS	NEG	10	NEG	NEG	2	1	2	1	16	4	1	0	8	3	8	3	BP
Beni	227.81	POS	320	POS	NEG	640	POS	POS	640	POS	POS	10	NEG	NEG	0.5	-1	0.5	-1	32	5	1	0	64	6	64	6	BR
Beni	32.245	DOU	40	POS	NEG	160	POS	NEG	10	NEG	NEG	10	NEG	NEG	0.25	-2	4	2	4	2	0.0625	-4	16	4	1	0	BR
Beni	66.075	POS	80	POS	NEG	640	POS	POS	20	POS	NEG	10	NEG	NEG	0.125	-3	4	2	8	3	0.03125	-5	64	6	2	1	BR
Beni	73.895	POS	160	POS	NEG	640	POS	POS	20	POS	NEG	10	NEG	NEG	0.25	-2	8	3	16	4	0.03125	-5	64	6	2	1	BR
Beni	3.2	NEG	NR	NEG	NEG	NR	NEG	NEG	NR	NEG	NEG	NR	NEG	NEG													NEG_ELISA
Beni	29.831	DOU	20	POS	NEG	80	POS	NEG	10	NEG	NEG	10	NEG	NEG	0.25	-2	2	1	2	1	0.125	-3	8	3	1	0	BR
Beni	1758	POS	640	POS	POS	320	POS	NEG	160	POS	NEG	10	NEG	NEG	2	1	4	2	64	6	0.5	-1	32	5	16	4	BP
Beni	12.599	NEG	NR	NEG	NEG	NR	NEG	NEG	NR	NEG	NEG	NR	NEG	NEG													NEG_ELISA
Beni	1902.4	POS	320	POS	NEG	160	POS	NEG	160	POS	NEG	10	NEG	NEG	2	1	2	1	32	5	1	0	16	4	16	4	BP
Beni	106.34	POS	80	POS	NEG	320	POS	NEG	40	POS	NEG	10	NEG	NEG	0.25	-2	2	1	8	3	0.125	-3	32	5	4	2	BR
Beni	2635	POS	640	POS	POS	10240	POS	POS	640	POS	POS	40	POS	NEG	0.0625	-4	1	0	16	4	0.0625	-4	256	8	16	4	BR
Beni	247.93	POS	40	POS	NEG	80	POS	NEG	160	POS	NEG	10	NEG	NEG	0.5	-1	0.25	-2	4	2	2	1	8	3	16	4	IN
Beni	8.3692	NEG	NR	NEG	NEG	NR	NEG	NEG	NR	NEG	NEG	NR	NEG	NEG													NEG_ELISA
Beni	1437.2	POS	2560	POS	POS	640	POS	POS	1280	POS	POS	40	POS	NEG	4	2	2	1	64	6	2	1	16	4	32	5	BP
Beni	87.45	POS	80	POS	NEG	40	POS	NEG	20	POS	NEG	10	NEG	NEG	2	1	4	2	8	3	0.5	-1	4	2	2	1	BP
Beni	1076.5	POS	160	POS	NEG	640	POS	POS	160	POS	NEG	80	POS	NEG	0.25	-2	1	0	2	1	0.25	-2	8	3	2	1	BR
Beni	81.588	POS	80	POS	NEG	40	POS	NEG	40	POS	NEG	10	NEG	NEG	2	1	2	1	8	3	1	0	4	2	4	2	BP
Beni	3.4954	NEG	NR	NEG	NEG	NR	NEG	NEG	NR	NEG	NEG	NR	NEG	NEG													NEG_ELISA
Beni	24.911	NEG	10	NEG	NEG	40	POS	NEG	10	NEG	NEG	10	NEG	NEG	0.25	-2	1	0	1	0	0.25	-2	4	2	1	0	NEG_ELISA
Beni	36.452	POS	40	POS	NEG	10	NEG	NEG	20	POS	NEG	10	NEG	NEG	4	2	2	1	4	2	2	1	1	0	2	1	BP
Beni	56.904	POS	10	NEG	NEG	10	NEG	NEG	10	NEG	NEG	10	NEG	NEG	1	0	1	0	1	0	1	0	1	0	1	0	NEG
Beni	71.654	POS	80	POS	NEG	40	POS	NEG	40	POS	NEG	10	NEG	NEG	2	1	2	1	8	3	1	0	4	2	4	2	BP
Beni	34.226	DOU	20	POS	NEG	640	POS	POS	40	POS	NEG	10	NEG	NEG	0.03125	-5	0.5	-1	2	1	0.0625	-4	64	6	4	2	BR
Beni	103.57	POS	160	POS	NEG	80	POS	NEG	40	POS	NEG	10	NEG	NEG	2	1	4	2	16	4	0.5	-1	8	3	4	2	BP
Beni	2415.6	POS	1280	POS	POS	2560	POS	POS	640	POS	POS	80	POS	NEG	0.5	-1	2	1	16	4	0.25	-2	32	5	8	3	BR
Beni	165.67	POS	320	POS	NEG	1280	POS	POS	160	POS	NEG	10	NEG	NEG	0.25	-2	2	1	32	5	0.125	-3	128	7	16	4	BR
Beni	348.26	POS	640	POS	POS	320	POS	NEG	160	POS	NEG	40	POS	NEG	2	1	4	2	16	4	0.5	-1	8	3	4	2	BP
Beni	48.974	POS	80	POS	NEG	40	POS	NEG	40	POS	NEG	10	NEG	NEG	2	1	2	1	8	3	1	0	4	2	4	2	BP
Beni	1205	POS	640	POS	POS	2560	POS	POS	320	POS	NEG	40	POS	NEG	0.25	-2	2	1	16	4	0.125	-3	64	6	8	3	BR
Beni	35.478	POS	20	POS	NEG	20	POS	NEG	10	NEG	NEG	10	NEG	NEG	1	0	2	1	2	1	0.5	-1	2	1	1	0	BP
Beni	187.96	POS	320	POS	NEG	160	POS	NEG	40	POS	NEG	10	NEG	NEG	2	1	8	3	32	5	0.25	-2	16	4	4	2	BP
Beni	232.36	POS	320	POS	NEG	160	POS	NEG	160	POS	NEG	40	POS	NEG	2	1	2	1	8	3	1	0	4	2	4	2	BP
Beni	15.163	NEG	NR	NEG	NEG	NR	NEG	NEG	NR	NEG	NEG	NR	NEG	NEG													NEG_ELISA
Beni	1697	POS	640	POS	POS	2560	POS	POS	640	POS	POS	80	POS	NEG	0.25	-2	1	0	8	3	0.25	-2	32	5	8	3	BR
Beni	53.009	POS	80	POS	NEG	80	POS	NEG	10	NEG	NEG	10	NEG	NEG	1	0	8	3	8	3	0.125	-3	8	3	1	0	BP
Beni	42.157	POS	10	NEG	NEG	40	POS	NEG	10	NEG	NEG	10	NEG	NEG	0.25	-2	1	0	1	0	0.25	-2	4	2	1	0	BR
Beni	71.328	POS	160	POS	NEG	640	POS	POS	80	POS	NEG	10	NEG	NEG	0.25	-2	2	1	16	4	0.125	-3	64	6	8	3	BR
Beni	4523.8	POS	2560	POS	POS	5120	POS	POS	1280	POS	POS	80	POS	NEG	0.5	-1	2	1	32	5	0.25	-2	64	6	16	4	BR
Beni	3.06	NEG	NR	NEG	NEG	NR	NEG	NEG	NR	NEG	NEG	NR	NEG	NEG													NEG_ELISA
Beni	173.55	POS	80	POS	NEG	320	POS	NEG	80	POS	NEG	10	NEG	NEG	0.25	-2	1	0	8	3	0.25	-2	32	5	8	3	BR
Beni	80.285	POS	160	POS	NEG	80	POS	NEG	40	POS	NEG	10	NEG	NEG	2	1	4	2	16	4	0.5	-1	8	3	4	2	BP
Beni	29.342	DOU	20	POS	NEG	80	POS	NEG	10	NEG	NEG	10	NEG	NEG	0.25	-2	2	1	2	1	0.125	-3	8	3	1	0	BR
Beni	22.695	NEG	10	NEG	NEG	10	NEG	NEG	10	NEG	NEG	10	NEG	NEG	1	0	1	0	1	0	1	0	1	0	1	0	NEG_ELISA
Beni	49.948	POS	80	POS	NEG	20	POS	NEG	10	NEG	NEG	10	NEG	NEG	4	2	8	3	8	3	0.5	-1	2	1	1	0	BP
Beni	23.138	NEG	20	POS	NEG	80	POS	NEG	20	POS	NEG	10	NEG	NEG	0.25	-2	1	0	2	1	0.25	-2	8	3	2	1	NEG_ELISA
Beni	160.67	POS	20	POS	NEG	80	POS	NEG	40	POS	NEG	10	NEG	NEG	0.25	-2	0.5	-1	2	1	0.5	-1	8	3	4	2	BR
Beni	3	NEG	NR	NEG	NEG	NR	NEG	NEG	NR	NEG	NEG	NR	NEG	NEG													NEG_ELISA
Beni	148.76	POS	80	POS	NEG	320	POS	NEG	80	POS	NEG	10	NEG	NEG	0.25	-2	1	0	8	3	0.25	-2	32	5	8	3	BR
Beni	40.626	POS	40	POS	NEG	10	NEG	NEG	10	NEG	NEG	10	NEG	NEG	4	2	4	2	4	2	1	0	1	0	1	0	BP
Beni	286.86	POS	320	POS	NEG	640	POS	POS	320	POS	NEG	40	POS	NEG	0.5	-1	1	0	8	3	0.5	-1	16	4	8	3	BR
Beni	49.252	POS	10	NEG	NEG	40	POS	NEG	10	NEG	NEG	10	NEG	NEG	0.25	-2	1	0	1	0	0.25	-2	4	2	1	0	BR
Beni	113.51	POS	80	POS	NEG	40	POS	NEG	10	NEG	NEG	10	NEG	NEG	2	1	8	3	8	3	0.25	-2	4	2	1	0	BP
Beni	41.183	POS	80	POS	NEG	320	POS	NEG	10	NEG	NEG	10	NEG	NEG	0.25	-2	8	3	8	3	0.03125	-5	32	5	1	0	BR
Beni	31.705	DOU	20	POS	NEG	20	POS	NEG	10	NEG	NEG	10	NEG	NEG	1	0	2	1	2	1	0.5	-1	2	1	1	0	BP
Beni	1966.5	POS	2560	POS	POS	1280	POS	POS	640	POS	POS	80	POS	NEG	2	1	4	2	32	5	0.5	-1	16	4	8	3	BP
Beni	5226.2	POS	2560	POS	POS	1280	POS	POS	10240	POS	POS	320	POS	NEG	2	1	0.25	-2	8	3	8	3	4	2	32	5	IN
Beni	58.574	POS	20	POS	NEG	80	POS	NEG	160	POS	NEG	10	NEG	NEG	0.25	-2	0.125	-3	2	1	2	1	8	3	16	4	IN
Beni	226.98	POS	10	NEG	NEG	20	POS	NEG	10	NEG	NEG	10	NEG	NEG	0.5	-1	1	0	1	0	0.5	-1	2	1	1	0	BR
Beni	15.163	NEG	NR	NEG	NEG	NR	NEG	NEG	NR	NEG	NEG	NR	NEG	NEG													NEG_ELISA
Beni	34.783	DOU	10	NEG	NEG	10	NEG	NEG	10	NEG	NEG	10	NEG	NEG	1	0	1	0	1	0	1	0	1	0	1	0	NEG
Beni	20.48	NEG	NR	NEG	NEG	NR	NEG	NEG	NR	NEG	NEG	NR	NEG	NEG													NEG_ELISA
Beni	7497.1	POS	640	POS	POS	20480	POS	POS	640	POS	POS	80	POS	NEG	0.03125	-5	1	0	8	3	0.03125	-5	256	8	8	3	BR
Beni	5065.8	POS	1280	POS	POS	2560	POS	POS	2560	POS	POS	80	POS	NEG	0.5	-1	0.5	-1	16	4	1	0	32	5	32	5	BR
Beni	186.81	POS	80	POS	NEG	320	POS	NEG	160	POS	NEG	10	NEG	NEG	0.25	-2	0.5	-1	8	3	0.5	-1	32	5	16	4	BR
Beni	82.402	POS	80	POS	NEG	320	POS	NEG	20	POS	NEG	10	NEG	NEG	0.25	-2	4	2	8	3	0.0625	-4	32	5	2	1	BR
Beni	20.628	NEG	NR	NEG	NEG	NR	NEG	NEG	NR	NEG	NEG	NR	NEG	NEG													NEG_ELISA
Beni	39.652	POS	40	POS	NEG	20	POS	NEG	10	NEG	NEG	10	NEG	NEG	2	1	4	2	4	2	0.5	-1	2	1	1	0	BP
Beni	5385.4	POS	2560	POS	POS	1280	POS	POS	1280	POS	POS	80	POS	NEG	2	1	2	1	32	5	1	0	16	4	16	4	BP
Beni	33.391	DOU	40	POS	NEG	20	POS	NEG	20	POS	NEG	10	NEG	NEG	2	1	2	1	4	2	1	0	2	1	2	1	BP
Beni	3402.2	POS	640	POS	POS	10240	POS	POS	1280	POS	POS	40	POS	NEG	0.0625	-4	0.5	-1	16	4	0.125	-3	256	8	32	5	BR
Beni	140.49	POS	20	POS	NEG	640	POS	POS	10	NEG	NEG	10	NEG	NEG	0.03125	-5	2	1	2	1	0.015625	-6	64	6	1	0	BR
Beni	102.92	POS	40	POS	NEG	320	POS	NEG	20	POS	NEG	10	NEG	NEG	0.125	-3	2	1	4	2	0.0625	-4	32	5	2	1	BR
Beni	62.052	POS	80	POS	NEG	160	POS	NEG	20	POS	NEG	10	NEG	NEG	0.5	-1	4	2	8	3	0.125	-3	16	4	2	1	BR
Beni	3.9385	NEG	NR	NEG	NEG	NR	NEG	NEG	NR	NEG	NEG	NR	NEG	NEG													NEG_ELISA
Beni	18.265	NEG	NR	NEG	NEG	NR	NEG	NEG	NR	NEG	NEG	NR	NEG	NEG													NEG_ELISA
Beni	6791	POS	1280	POS	POS	2560	POS	POS	2560	POS	POS	80	POS	NEG	0.5	-1	0.5	-1	16	4	1	0	32	5	32	5	BR
Beni	50.226	POS	20	POS	NEG	80	POS	NEG	10	NEG	NEG	10	NEG	NEG	0.25	-2	2	1	2	1	0.125	-3	8	3	1	0	BR
Beni	9.9938	NEG	NR	NEG	NEG	NR	NEG	NEG	NR	NEG	NEG	NR	NEG	NEG													NEG_ELISA
Beni	142.75	POS	320	POS	NEG	640	POS	POS	320	POS	NEG	40	POS	NEG	0.5	-1	1	0	8	3	0.5	-1	16	4	8	3	BR
Beni	233.51	POS	40	POS	NEG	80	POS	NEG	20	POS	NEG	10	NEG	NEG	0.5	-1	2	1	4	2	0.25	-2	8	3	2	1	BR
Beni	2351.5	POS	2560	POS	POS	1280	POS	POS	640	POS	POS	40	POS	NEG	2	1	4	2	64	6	0.5	-1	32	5	16	4	BP
Beni	6317.4	POS	640	POS	POS	5120	POS	POS	2560	POS	POS	40	POS	NEG	0.125	-3	0.25	-2	16	4	0.5	-1	128	7	64	6	BR
Beni	38.4	POS	40	POS	NEG	20	POS	NEG	20	POS	NEG	10	NEG	NEG	2	1	2	1	4	2	1	0	2	1	2	1	BP
Beni	11.323	NEG	NR	NEG	NEG	NR	NEG	NEG	NR	NEG	NEG	NR	NEG	NEG													NEG_ELISA
Beni	3277.1	POS	1280	POS	POS	5120	POS	POS	1280	POS	POS	80	POS	NEG	0.25	-2	1	0	16	4	0.25	-2	64	6	16	4	BR
Beni	32.835	DOU	20	POS	NEG	40	POS	NEG	10	NEG	NEG	10	NEG	NEG	0.5	-1	2	1	2	1	0.25	-2	4	2	1	0	BR
Beni	58.017	POS	40	POS	NEG	80	POS	NEG	40	POS	NEG	10	NEG	NEG	0.5	-1	1	0	4	2	0.5	-1	8	3	4	2	BR
Beni	67.42	POS	160	POS	NEG	40	POS	NEG	40	POS	NEG	10	NEG	NEG	4	2	4	2	16	4	1	0	4	2	4	2	BP
Beni	269.97	POS	160	POS	NEG	1280	POS	POS	80	POS	NEG	40	POS	NEG	0.125	-3	2	1	4	2	0.0625	-4	32	5	2	1	BR
Beni	11.766	NEG	NR	NEG	NEG	NR	NEG	NEG	NR	NEG	NEG	NR	NEG	NEG													NEG_ELISA
Beni	12510	POS	2560	POS	POS	20480	POS	POS	2560	POS	POS	320	POS	NEG	0.125	-3	1	0	8	3	0.125	-3	64	6	8	3	BR
Beni	83.542	POS	20	POS	NEG	40	POS	NEG	40	POS	NEG	10	NEG	NEG	0.5	-1	0.5	-1	2	1	1	0	4	2	4	2	BR
Beni	755.15	POS	160	POS	NEG	1280	POS	POS	320	POS	NEG	40	POS	NEG	0.125	-3	0.5	-1	4	2	0.25	-2	32	5	8	3	BR
Beni	213.72	POS	320	POS	NEG	640	POS	POS	80	POS	NEG	10	NEG	NEG	0.5	-1	4	2	32	5	0.125	-3	64	6	8	3	BR
Beni	158.37	POS	40	POS	NEG	320	POS	NEG	80	POS	NEG	10	NEG	NEG	0.125	-3	0.5	-1	4	2	0.25	-2	32	5	8	3	BR
Beni	49.391	POS	40	POS	NEG	80	POS	NEG	20	POS	NEG	10	NEG	NEG	0.5	-1	2	1	4	2	0.25	-2	8	3	2	1	BR
Beni	78.621	POS	80	POS	NEG	40	POS	NEG	10	NEG	NEG	10	NEG	NEG	2	1	8	3	8	3	0.25	-2	4	2	1	0	BP
Beni	3.06	NEG	NR	NEG	NEG	NR	NEG	NEG	NR	NEG	NEG	NR	NEG	NEG													NEG_ELISA
Beni	68.414	POS	10	NEG	NEG	80	POS	NEG	40	POS	NEG	10	NEG	NEG	0.125	-3	0.25	-2	1	0	0.5	-1	8	3	4	2	BR
Beni	3.2	NEG	NR	NEG	NEG	NR	NEG	NEG	NR	NEG	NEG	NR	NEG	NEG													NEG_ELISA
Beni	23.174	NEG	10	NEG	NEG	80	POS	NEG	20	POS	NEG	10	NEG	NEG	0.125	-3	0.5	-1	1	0	0.25	-2	8	3	2	1	NEG_ELISA
Beni	3214.6	POS	2560	POS	POS	1280	POS	POS	1280	POS	POS	80	POS	NEG	2	1	2	1	32	5	1	0	16	4	16	4	BP
Beni	12713	POS	2560	POS	POS	5120	POS	POS	1280	POS	POS	320	POS	NEG	0.5	-1	2	1	8	3	0.25	-2	16	4	4	2	BR
Beni	21.781	NEG	NR	NEG	NEG	NR	NEG	NEG	NR	NEG	NEG	NR	NEG	NEG													NEG_ELISA
Beni	31.303	DOU	20	POS	NEG	80	POS	NEG	10	NEG	NEG	10	NEG	NEG	0.25	-2	2	1	2	1	0.125	-3	8	3	1	0	BR
Beni	99.586	POS	10	NEG	NEG	10	NEG	NEG	10	NEG	NEG	10	NEG	NEG	1	0	1	0	1	0	1	0	1	0	1	0	NEG
Beni	5.5226	NEG	NR	NEG	NEG	NR	NEG	NEG	NR	NEG	NEG	NR	NEG	NEG													NEG_ELISA
Beni	1536.6	POS	80	POS	NEG	640	POS	POS	40	POS	NEG	20	POS	NEG	0.125	-3	2	1	4	2	0.0625	-4	32	5	2	1	BR
Beni	27.006	DOU	80	POS	NEG	40	POS	NEG	40	POS	NEG	10	NEG	NEG	2	1	2	1	8	3	1	0	4	2	4	2	BP
Beni	165.79	POS	160	POS	NEG	320	POS	NEG	160	POS	NEG	20	POS	NEG	0.5	-1	1	0	8	3	0.5	-1	16	4	8	3	BR
Beni	216.69	POS	80	POS	NEG	40	POS	NEG	40	POS	NEG	10	NEG	NEG	2	1	2	1	8	3	1	0	4	2	4	2	BP
Beni	54.946	POS	40	POS	NEG	10	NEG	NEG	10	NEG	NEG	10	NEG	NEG	4	2	4	2	4	2	1	0	1	0	1	0	BP
Beni	93.517	POS	80	POS	NEG	1280	POS	POS	80	POS	NEG	10	NEG	NEG	0.0625	-4	1	0	8	3	0.0625	-4	128	7	8	3	BR
Beni	253.53	POS	160	POS	NEG	40	POS	NEG	160	POS	NEG	10	NEG	NEG	4	2	1	0	16	4	4	2	4	2	16	4	BP
Beni	3.16	NEG	NR	NEG	NEG	NR	NEG	NEG	NR	NEG	NEG	NR	NEG	NEG													NEG_ELISA
Beni	26.077	DOU	10	NEG	NEG	40	POS	NEG	10	NEG	NEG	10	NEG	NEG	0.25	-2	1	0	1	0	0.25	-2	4	2	1	0	BR
Beni	167.31	POS	320	POS	NEG	640	POS	POS	160	POS	NEG	10	NEG	NEG	0.5	-1	2	1	32	5	0.25	-2	64	6	16	4	BR
Beni	275.19	POS	160	POS	NEG	640	POS	POS	320	POS	NEG	10	NEG	NEG	0.25	-2	0.5	-1	16	4	0.5	-1	64	6	32	5	BR
Beni	5910.4	POS	2560	POS	POS	5120	POS	POS	2560	POS	POS	80	POS	NEG	0.5	-1	1	0	32	5	0.5	-1	64	6	32	5	BR
Beni	5086.6	POS	2560	POS	POS	20480	POS	POS	2560	POS	POS	80	POS	NEG	0.125	-3	1	0	32	5	0.125	-3	256	8	32	5	BR
Beni	310.41	POS	320	POS	NEG	1280	POS	POS	160	POS	NEG	40	POS	NEG	0.25	-2	2	1	8	3	0.125	-3	32	5	4	2	BR
Beni	37.209	POS	80	POS	NEG	40	POS	NEG	20	POS	NEG	10	NEG	NEG	2	1	4	2	8	3	0.5	-1	4	2	2	1	BP
Beni	3.05	NEG	NR	NEG	NEG	NR	NEG	NEG	NR	NEG	NEG	NR	NEG	NEG													NEG_ELISA
Beni	51.225	POS	40	POS	NEG	160	POS	NEG	20	POS	NEG	10	NEG	NEG	0.25	-2	2	1	4	2	0.125	-3	16	4	2	1	BR
Beni	85.793	POS	160	POS	NEG	640	POS	POS	40	POS	NEG	10	NEG	NEG	0.25	-2	4	2	16	4	0.0625	-4	64	6	4	2	BR
Beni	31.187	DOU	20	POS	NEG	40	POS	NEG	10	NEG	NEG	10	NEG	NEG	0.5	-1	2	1	2	1	0.25	-2	4	2	1	0	BR
Beni	11.213	NEG	NR	NEG	NEG	NR	NEG	NEG	NR	NEG	NEG	NR	NEG	NEG													NEG_ELISA
Beni	7167.4	POS	1280	POS	POS	1280	POS	POS	2560	POS	POS	80	POS	NEG	1	0	0.5	-1	16	4	2	1	16	4	32	5	IN
Beni	340.63	POS	160	POS	NEG	2560	POS	POS	320	POS	NEG	40	POS	NEG	0.0625	-4	0.5	-1	4	2	0.125	-3	64	6	8	3	BR
Beni	268.09	POS	160	POS	NEG	640	POS	POS	160	POS	NEG	20	POS	NEG	0.25	-2	1	0	8	3	0.25	-2	32	5	8	3	BR
Beni	4844.8	POS	640	POS	POS	20480	POS	POS	1280	POS	POS	80	POS	NEG	0.03125	-5	0.5	-1	8	3	0.0625	-4	256	8	16	4	BR
Beni	1921.6	POS	1280	POS	POS	2560	POS	POS	2560	POS	POS	160	POS	NEG	0.5	-1	0.5	-1	8	3	1	0	16	4	16	4	BR
Beni	2524.7	POS	1280	POS	POS	640	POS	POS	640	POS	POS	40	POS	NEG	2	1	2	1	32	5	1	0	16	4	16	4	BP
Beni	199.22	POS	160	POS	NEG	1280	POS	POS	40	POS	NEG	10	NEG	NEG	0.125	-3	4	2	16	4	0.03125	-5	128	7	4	2	BR
Beni	68.414	POS	40	POS	NEG	160	POS	NEG	10	NEG	NEG	10	NEG	NEG	0.25	-2	4	2	4	2	0.0625	-4	16	4	1	0	BR
Beni	3577.3	POS	640	POS	POS	1280	POS	POS	640	POS	POS	160	POS	NEG	0.5	-1	1	0	4	2	0.5	-1	8	3	4	2	BR
Beni	1401.9	POS	80	POS	NEG	640	POS	POS	80	POS	NEG	10	NEG	NEG	0.125	-3	1	0	8	3	0.125	-3	64	6	8	3	BR
Beni	285.17	POS	320	POS	NEG	640	POS	POS	160	POS	NEG	10	NEG	NEG	0.5	-1	2	1	32	5	0.25	-2	64	6	16	4	BR
Beni	1296	POS	320	POS	NEG	80	POS	NEG	320	POS	NEG	10	NEG	NEG	4	2	1	0	32	5	4	2	8	3	32	5	BP
Beni	188.39	POS	320	POS	NEG	1280	POS	POS	160	POS	NEG	40	POS	NEG	0.25	-2	2	1	8	3	0.125	-3	32	5	4	2	BR
Beni	25.961	DOU	10	NEG	NEG	10	NEG	NEG	10	NEG	NEG	10	NEG	NEG	1	0	1	0	1	0	1	0	1	0	1	0	NEG
Beni	155.73	POS	160	POS	NEG	320	POS	NEG	20	POS	NEG	10	NEG	NEG	0.5	-1	8	3	16	4	0.0625	-4	32	5	2	1	BR
Beni	2181.5	POS	640	POS	POS	10240	POS	POS	1280	POS	POS	320	POS	NEG	0.0625	-4	0.5	-1	2	1	0.125	-3	32	5	4	2	BR
Beni	3.09	NEG	NR	NEG	NEG	NR	NEG	NEG	NR	NEG	NEG	NR	NEG	NEG													NEG_ELISA
Beni	12.723	NEG	NR	NEG	NEG	NR	NEG	NEG	NR	NEG	NEG	NR	NEG	NEG													NEG_ELISA
Beni	63.132	POS	10	NEG	NEG	10	NEG	NEG	10	NEG	NEG	10	NEG	NEG	1	0	1	0	1	0	1	0	1	0	1	0	NEG
Beni	89.103	POS	160	POS	NEG	320	POS	NEG	80	POS	NEG	10	NEG	NEG	0.5	-1	2	1	16	4	0.25	-2	32	5	8	3	BR
Beni	1738.7	POS	640	POS	POS	5120	POS	POS	1280	POS	POS	80	POS	NEG	0.125	-3	0.5	-1	8	3	0.25	-2	64	6	16	4	BR
Beni	61.519	POS	20	POS	NEG	80	POS	NEG	10	NEG	NEG	10	NEG	NEG	0.25	-2	2	1	2	1	0.125	-3	8	3	1	0	BR
Beni	1315.3	POS	1280	POS	POS	640	POS	POS	640	POS	POS	40	POS	NEG	2	1	2	1	32	5	1	0	16	4	16	4	BP
Beni	13.768	NEG	NR	NEG	NEG	NR	NEG	NEG	NR	NEG	NEG	NR	NEG	NEG													NEG_ELISA
Beni	2568.3	POS	320	POS	NEG	640	POS	POS	320	POS	NEG	10	NEG	NEG	0.5	-1	1	0	32	5	0.5	-1	64	6	32	5	BR
Beni	3156.2	POS	2560	POS	POS	5120	POS	POS	2560	POS	POS	320	POS	NEG	0.5	-1	1	0	8	3	0.5	-1	16	4	8	3	BR
Beni	43.907	POS	80	POS	NEG	40	POS	NEG	40	POS	NEG	10	NEG	NEG	2	1	2	1	8	3	1	0	4	2	4	2	BP
Beni	1261.3	POS	640	POS	POS	1280	POS	POS	320	POS	NEG	20	POS	NEG	0.5	-1	2	1	32	5	0.25	-2	64	6	16	4	BR
Beni	109.52	POS	160	POS	NEG	80	POS	NEG	40	POS	NEG	10	NEG	NEG	2	1	4	2	16	4	0.5	-1	8	3	4	2	BP
Beni	3.5484	NEG	NR	NEG	NEG	NR	NEG	NEG	NR	NEG	NEG	NR	NEG	NEG													NEG_ELISA
Beni	27.239	DOU	40	POS	NEG	160	POS	NEG	10	NEG	NEG	10	NEG	NEG	0.25	-2	4	2	4	2	0.0625	-4	16	4	1	0	BR
Beni	140.53	POS	640	POS	POS	320	POS	NEG	320	POS	NEG	10	NEG	NEG	2	1	2	1	64	6	1	0	32	5	32	5	BP
Beni	47.504	POS	80	POS	NEG	40	POS	NEG	40	POS	NEG	10	NEG	NEG	2	1	2	1	8	3	1	0	4	2	4	2	BP
Beni	2037.1	POS	160	POS	NEG	320	POS	NEG	640	POS	POS	10	NEG	NEG	0.5	-1	0.25	-2	16	4	2	1	32	5	64	6	IN
Beni	3810.8	POS	1280	POS	POS	10240	POS	POS	2560	POS	POS	80	POS	NEG	0.125	-3	0.5	-1	16	4	0.25	-2	128	7	32	5	BR
Beni	47.876	POS	160	POS	NEG	10	NEG	NEG	80	POS	NEG	10	NEG	NEG	16	4	2	1	16	4	8	3	1	0	8	3	BP
Beni	57.922	POS	40	POS	NEG	20	POS	NEG	20	POS	NEG	10	NEG	NEG	2	1	2	1	4	2	1	0	2	1	2	1	BP
Beni	136.93	POS	320	POS	NEG	160	POS	NEG	80	POS	NEG	10	NEG	NEG	2	1	4	2	32	5	0.5	-1	16	4	8	3	BP
Beni	56.434	POS	40	POS	NEG	20	POS	NEG	80	POS	NEG	10	NEG	NEG	2	1	0.5	-1	4	2	4	2	2	1	8	3	IN
Beni	220.11	POS	160	POS	NEG	80	POS	NEG	160	POS	NEG	40	POS	NEG	2	1	1	0	4	2	2	1	2	1	4	2	BP
Beni	26.077	DOU	320	POS	NEG	40	POS	NEG	80	POS	NEG	10	NEG	NEG	8	3	4	2	32	5	2	1	4	2	8	3	BP
Beni	7343.8	POS	1280	POS	POS	10240	POS	POS	1280	POS	POS	80	POS	NEG	0.125	-3	1	0	16	4	0.125	-3	128	7	16	4	BR
Beni	29.794	DOU	20	POS	NEG	160	POS	NEG	10	NEG	NEG	10	NEG	NEG	0.125	-3	2	1	2	1	0.0625	-4	16	4	1	0	BR
Beni	47.38	POS	80	POS	NEG	40	POS	NEG	40	POS	NEG	20	POS	NEG	2	1	2	1	4	2	1	0	2	1	2	1	BP
Beni	15.394	NEG	NR	NEG	NEG	NR	NEG	NEG	NR	NEG	NEG	NR	NEG	NEG													NEG_ELISA
Beni	36.093	POS	80	POS	NEG	40	POS	NEG	20	POS	NEG	10	NEG	NEG	2	1	4	2	8	3	0.5	-1	4	2	2	1	BP
Beni	95.31	POS	320	POS	NEG	80	POS	NEG	80	POS	NEG	10	NEG	NEG	4	2	4	2	32	5	1	0	8	3	8	3	BP
Beni	70.069	POS	80	POS	NEG	40	POS	NEG	40	POS	NEG	10	NEG	NEG	2	1	2	1	8	3	1	0	4	2	4	2	BP
Beni	7184.5	POS	2560	POS	POS	10240	POS	POS	1280	POS	POS	80	POS	NEG	0.25	-2	2	1	32	5	0.125	-3	128	7	16	4	BR
Beni	1854.2	POS	160	POS	NEG	160	POS	NEG	320	POS	NEG	20	POS	NEG	1	0	0.5	-1	8	3	2	1	8	3	16	4	IN
Beni	1401.9	POS	640	POS	POS	10240	POS	POS	2560	POS	POS	40	POS	NEG	0.0625	-4	0.25	-2	16	4	0.25	-2	256	8	64	6	BR
Beni	26.542	DOU	20	POS	NEG	40	POS	NEG	20	POS	NEG	10	NEG	NEG	0.5	-1	1	0	2	1	0.5	-1	4	2	2	1	BR
Beni	47.256	POS	160	POS	NEG	160	POS	NEG	10	NEG	NEG	10	NEG	NEG	1	0	16	4	16	4	0.0625	-4	16	4	1	0	BP
Beni	4.9419	NEG	NR	NEG	NEG	NR	NEG	NEG	NR	NEG	NEG	NR	NEG	NEG													NEG_ELISA
Beni	10860	POS	5120	POS	POS	20480	POS	POS	5120	POS	POS	80	POS	NEG	0.25	-2	1	0	64	6	0.25	-2	256	8	64	6	BR
Beni	4907.4	POS	1280	POS	POS	10240	POS	POS	1280	POS	POS	160	POS	NEG	0.125	-3	1	0	8	3	0.125	-3	64	6	8	3	BR
Beni	349.31	POS	640	POS	POS	2560	POS	POS	320	POS	NEG	10	NEG	NEG	0.25	-2	2	1	64	6	0.125	-3	256	8	32	5	BR
Beni	2810.2	POS	640	POS	POS	320	POS	NEG	1280	POS	POS	40	POS	NEG	2	1	0.5	-1	16	4	4	2	8	3	32	5	IN
Beni	6.8632	NEG	NR	NEG	NEG	NR	NEG	NEG	NR	NEG	NEG	NR	NEG	NEG													NEG_ELISA
Beni	3282.5	POS	2560	POS	POS	5120	POS	POS	2560	POS	POS	160	POS	NEG	0.5	-1	1	0	16	4	0.5	-1	32	5	16	4	BR
Beni	14.821	NEG	NR	NEG	NEG	NR	NEG	NEG	NR	NEG	NEG	NR	NEG	NEG													NEG_ELISA
Beni	2311.5	POS	640	POS	POS	20480	POS	POS	640	POS	POS	40	POS	NEG	0.03125	-5	1	0	16	4	0.03125	-5	512	9	16	4	BR
Beni	218.17	POS	640	POS	POS	1280	POS	POS	160	POS	NEG	10	NEG	NEG	0.5	-1	4	2	64	6	0.125	-3	128	7	16	4	BR
Beni	335.5	POS	640	POS	POS	320	POS	NEG	160	POS	NEG	40	POS	NEG	2	1	4	2	16	4	0.5	-1	8	3	4	2	BP
Beni	2850.6	POS	320	POS	NEG	1280	POS	POS	1280	POS	POS	40	POS	NEG	0.25	-2	0.25	-2	8	3	1	0	32	5	32	5	BR
Beni	9657.9	POS	5120	POS	POS	10240	POS	POS	2560	POS	POS	640	POS	POS	0.5	-1	2	1	8	3	0.25	-2	16	4	4	2	BR
Beni	3628	POS	640	POS	POS	2560	POS	POS	320	POS	NEG	80	POS	NEG	0.25	-2	2	1	8	3	0.125	-3	32	5	4	2	BR
Beni	6554.7	POS	640	POS	POS	2560	POS	POS	320	POS	NEG	80	POS	NEG	0.25	-2	2	1	8	3	0.125	-3	32	5	4	2	BR
Beni	358.17	POS	160	POS	NEG	80	POS	NEG	40	POS	NEG	20	POS	NEG	2	1	4	2	8	3	0.5	-1	4	2	2	1	BP
Beni	95.74	POS	20	POS	NEG	20	POS	NEG	10	NEG	NEG	10	NEG	NEG	1	0	2	1	2	1	0.5	-1	2	1	1	0	BP
Beni	93.789	POS	20	POS	NEG	640	POS	POS	10	NEG	NEG	10	NEG	NEG	0.03125	-5	2	1	2	1	0.015625	-6	64	6	1	0	BR
Beni	53.801	POS	40	POS	NEG	160	POS	NEG	20	POS	NEG	10	NEG	NEG	0.25	-2	2	1	4	2	0.125	-3	16	4	2	1	BR
Beni	1450.5	POS	80	POS	NEG	320	POS	NEG	40	POS	NEG	10	NEG	NEG	0.25	-2	2	1	8	3	0.125	-3	32	5	4	2	BR
Beni	346.4	POS	20	POS	NEG	640	POS	POS	20	POS	NEG	20	POS	NEG	0.03125	-5	1	0	1	0	0.03125	-5	32	5	1	0	BR
Beni	34.422	DOU	40	POS	NEG	20	POS	NEG	20	POS	NEG	10	NEG	NEG	2	1	2	1	4	2	1	0	2	1	2	1	BP
Beni	29.221	DOU	40	POS	NEG	40	POS	NEG	10	NEG	NEG	10	NEG	NEG	1	0	4	2	4	2	0.25	-2	4	2	1	0	BP
Beni	247.75	POS	640	POS	POS	320	POS	NEG	80	POS	NEG	20	POS	NEG	2	1	8	3	32	5	0.25	-2	16	4	4	2	BP
Beni	4.0842	NEG	NR	NEG	NEG	NR	NEG	NEG	NR	NEG	NEG	NR	NEG	NEG													NEG_ELISA
Beni	202.22	POS	640	POS	POS	80	POS	NEG	160	POS	NEG	10	NEG	NEG	8	3	4	2	64	6	2	1	8	3	16	4	BP
Beni	95.87	POS	160	POS	NEG	640	POS	POS	40	POS	NEG	10	NEG	NEG	0.25	-2	4	2	16	4	0.0625	-4	64	6	4	2	BR
Beni	22.021	NEG	20	POS	NEG	160	POS	NEG	10	NEG	NEG	10	NEG	NEG	0.125	-3	2	1	2	1	0.0625	-4	16	4	1	0	NEG_ELISA
Beni	353.87	POS	80	POS	NEG	1280	POS	POS	20	POS	NEG	40	POS	NEG	0.0625	-4	4	2	2	1	0.015625	-6	32	5	0.5	-1	BR
Beni	111.35	POS	80	POS	NEG	80	POS	NEG	10	NEG	NEG	10	NEG	NEG	1	0	8	3	8	3	0.125	-3	8	3	1	0	BP
Beni	21.642	NEG	NR	NEG	NEG	NR	NEG	NEG	NR	NEG	NEG	NR	NEG	NEG													NEG_ELISA
Beni	111.22	POS	640	POS	POS	80	POS	NEG	160	POS	NEG	10	NEG	NEG	8	3	4	2	64	6	2	1	8	3	16	4	BP
Beni	12.295	NEG	NR	NEG	NEG	NR	NEG	NEG	NR	NEG	NEG	NR	NEG	NEG													NEG_ELISA
Beni	5699.5	POS	1280	POS	POS	10240	POS	POS	2560	POS	POS	160	POS	NEG	0.125	-3	0.5	-1	8	3	0.25	-2	64	6	16	4	BR
Beni	12.042	NEG	NR	NEG	NEG	NR	NEG	NEG	NR	NEG	NEG	NR	NEG	NEG													NEG_ELISA
Beni	5.7263	NEG	NR	NEG	NEG	NR	NEG	NEG	NR	NEG	NEG	NR	NEG	NEG													NEG_ELISA
Beni	3.1	NEG	NR	NEG	NEG	NR	NEG	NEG	NR	NEG	NEG	NR	NEG	NEG													NEG_ELISA
Beni	34.932	DOU	40	POS	NEG	80	POS	NEG	10	NEG	NEG	10	NEG	NEG	0.5	-1	4	2	4	2	0.125	-3	8	3	1	0	BR
Beni	49.721	POS	20	POS	NEG	40	POS	NEG	10	NEG	NEG	10	NEG	NEG	0.5	-1	2	1	2	1	0.25	-2	4	2	1	0	BR
Beni	120.72	POS	80	POS	NEG	160	POS	NEG	40	POS	NEG	10	NEG	NEG	0.5	-1	2	1	8	3	0.25	-2	16	4	4	2	BR
Beni	191.46	POS	80	POS	NEG	320	POS	NEG	10	NEG	NEG	20	POS	NEG	0.25	-2	8	3	4	2	0.03125	-5	16	4	0.5	-1	BR
Beni	3101.8	POS	1280	POS	POS	2560	POS	POS	640	POS	POS	80	POS	NEG	0.5	-1	2	1	16	4	0.25	-2	32	5	8	3	BR
Beni	3.12	NEG	NR	NEG	NEG	NR	NEG	NEG	NR	NEG	NEG	NR	NEG	NEG													NEG_ELISA
Beni	64.911	POS	40	POS	NEG	640	POS	POS	10	NEG	NEG	10	NEG	NEG	0.0625	-4	4	2	4	2	0.015625	-6	64	6	1	0	BR
Beni	103.41	POS	320	POS	NEG	160	POS	NEG	80	POS	NEG	10	NEG	NEG	2	1	4	2	32	5	0.5	-1	16	4	8	3	BP
Beni	1294.4	POS	640	POS	POS	5120	POS	POS	640	POS	POS	80	POS	NEG	0.125	-3	1	0	8	3	0.125	-3	64	6	8	3	BR
Beni	183.93	POS	160	POS	NEG	80	POS	NEG	20	POS	NEG	10	NEG	NEG	2	1	8	3	16	4	0.25	-2	8	3	2	1	BP
Beni	5187.5	POS	2560	POS	POS	5120	POS	POS	1280	POS	POS	80	POS	NEG	0.5	-1	2	1	32	5	0.25	-2	64	6	16	4	BR
Beni	141.98	POS	160	POS	NEG	640	POS	POS	10	NEG	NEG	10	NEG	NEG	0.25	-2	16	4	16	4	0.015625	-6	64	6	1	0	BR
Beni	4841.2	POS	1280	POS	POS	5120	POS	POS	320	POS	NEG	160	POS	NEG	0.25	-2	4	2	8	3	0.0625	-4	32	5	2	1	BR
Beni	1901.2	POS	640	POS	POS	320	POS	NEG	320	POS	NEG	40	POS	NEG	2	1	2	1	16	4	1	0	8	3	8	3	BP
Beni	25.684	DOU	40	POS	NEG	80	POS	NEG	20	POS	NEG	10	NEG	NEG	0.5	-1	2	1	4	2	0.25	-2	8	3	2	1	BR
Beni	99.382	POS	80	POS	NEG	1280	POS	POS	40	POS	NEG	10	NEG	NEG	0.0625	-4	2	1	8	3	0.03125	-5	128	7	4	2	BR
Beni	94.049	POS	160	POS	NEG	80	POS	NEG	80	POS	NEG	10	NEG	NEG	2	1	2	1	16	4	1	0	8	3	8	3	BP
Beni	11.284	NEG	NR	NEG	NEG	NR	NEG	NEG	NR	NEG	NEG	NR	NEG	NEG													NEG_ELISA
Beni	51.888	POS	40	POS	NEG	20	POS	NEG	20	POS	NEG	10	NEG	NEG	2	1	2	1	4	2	1	0	2	1	2	1	BP
Beni	69.463	POS	160	POS	NEG	80	POS	NEG	80	POS	NEG	10	NEG	NEG	2	1	2	1	16	4	1	0	8	3	8	3	BP
Beni	3.07	NEG	NR	NEG	NEG	NR	NEG	NEG	NR	NEG	NEG	NR	NEG	NEG													NEG_ELISA
Beni	19.621	NEG	NR	NEG	NEG	NR	NEG	NEG	NR	NEG	NEG	NR	NEG	NEG													NEG_ELISA
Beni	245.24	POS	160	POS	NEG	80	POS	NEG	80	POS	NEG	10	NEG	NEG	2	1	2	1	16	4	1	0	8	3	8	3	BP
Beni	111.35	POS	160	POS	NEG	80	POS	NEG	20	POS	NEG	10	NEG	NEG	2	1	8	3	16	4	0.25	-2	8	3	2	1	BP
Beni	158.3	POS	160	POS	NEG	80	POS	NEG	20	POS	NEG	10	NEG	NEG	2	1	8	3	16	4	0.25	-2	8	3	2	1	BP
Beni	4.5895	NEG	NR	NEG	NEG	NR	NEG	NEG	NR	NEG	NEG	NR	NEG	NEG													NEG_ELISA
Beni	2697.4	POS	320	POS	NEG	160	POS	NEG	640	POS	POS	20	POS	NEG	2	1	0.5	-1	16	4	4	2	8	3	32	5	IN
Beni	1269.5	POS	320	POS	NEG	640	POS	POS	160	POS	NEG	10	NEG	NEG	0.5	-1	2	1	32	5	0.25	-2	64	6	16	4	BR
Beni	4896.2	POS	2560	POS	POS	10240	POS	POS	1280	POS	POS	320	POS	NEG	0.25	-2	2	1	8	3	0.125	-3	32	5	4	2	BR
Beni	1378.2	POS	640	POS	POS	320	POS	NEG	80	POS	NEG	10	NEG	NEG	2	1	8	3	64	6	0.25	-2	32	5	8	3	BP
Beni	2878	POS	1280	POS	POS	5120	POS	POS	320	POS	NEG	40	POS	NEG	0.25	-2	4	2	32	5	0.0625	-4	128	7	8	3	BR
Beni	22.274	NEG	10	NEG	NEG	40	POS	NEG	10	NEG	NEG	10	NEG	NEG	0.25	-2	1	0	1	0	0.25	-2	4	2	1	0	NEG_ELISA
Beni	91.447	POS	40	POS	NEG	160	POS	NEG	20	POS	NEG	10	NEG	NEG	0.25	-2	2	1	4	2	0.125	-3	16	4	2	1	BR
Beni	18.863	NEG	NR	NEG	NEG	NR	NEG	NEG	NR	NEG	NEG	NR	NEG	NEG													NEG_ELISA
Beni	4271.9	POS	2560	POS	POS	640	POS	POS	1280	POS	POS	80	POS	NEG	4	2	2	1	32	5	2	1	8	3	16	4	BP
Beni	2551.3	POS	2560	POS	POS	1280	POS	POS	320	POS	NEG	80	POS	NEG	2	1	8	3	32	5	0.25	-2	16	4	4	2	BP
Beni	2752.4	POS	640	POS	POS	2560	POS	POS	640	POS	POS	160	POS	NEG	0.25	-2	1	0	4	2	0.25	-2	16	4	4	2	BR
Beni	1727.9	POS	640	POS	POS	2560	POS	POS	320	POS	NEG	40	POS	NEG	0.25	-2	2	1	16	4	0.125	-3	64	6	8	3	BR
Beni	206.34	POS	320	POS	NEG	640	POS	POS	80	POS	NEG	10	NEG	NEG	0.5	-1	4	2	32	5	0.125	-3	64	6	8	3	BR
Beni	4334.7	POS	2560	POS	POS	1280	POS	POS	1280	POS	POS	80	POS	NEG	2	1	2	1	32	5	1	0	16	4	16	4	BP
Beni	252.24	POS	640	POS	POS	80	POS	NEG	320	POS	NEG	20	POS	NEG	8	3	2	1	32	5	4	2	4	2	16	4	BP
Beni	104.85	POS	80	POS	NEG	160	POS	NEG	160	POS	NEG	40	POS	NEG	0.5	-1	0.5	-1	2	1	1	0	4	2	4	2	BR
Beni	380.27	POS	160	POS	NEG	320	POS	NEG	40	POS	NEG	20	POS	NEG	0.5	-1	4	2	8	3	0.125	-3	16	4	2	1	BR
Beni	7511.2	POS	640	POS	POS	1280	POS	POS	640	POS	POS	80	POS	NEG	0.5	-1	1	0	8	3	0.5	-1	16	4	8	3	BR
Beni	3.3263	NEG	NR	NEG	NEG	NR	NEG	NEG	NR	NEG	NEG	NR	NEG	NEG													NEG_ELISA
Beni	272.65	POS	320	POS	NEG	160	POS	NEG	320	POS	NEG	40	POS	NEG	2	1	1	0	8	3	2	1	4	2	8	3	BP
Beni	25.811	DOU	40	POS	NEG	40	POS	NEG	10	NEG	NEG	10	NEG	NEG	1	0	4	2	4	2	0.25	-2	4	2	1	0	BP
Beni	4.3368	NEG	NR	NEG	NEG	NR	NEG	NEG	NR	NEG	NEG	NR	NEG	NEG													NEG_ELISA
Beni	4.0842	NEG	NR	NEG	NEG	NR	NEG	NEG	NR	NEG	NEG	NR	NEG	NEG													NEG_ELISA
Beni	3690.8	POS	2560	POS	POS	1280	POS	POS	1280	POS	POS	160	POS	NEG	2	1	2	1	16	4	1	0	8	3	8	3	BP
Beni	58.518	POS	80	POS	NEG	640	POS	POS	20	POS	NEG	10	NEG	NEG	0.125	-3	4	2	8	3	0.03125	-5	64	6	2	1	BR
Beni	5384.4	POS	640	POS	POS	5120	POS	POS	320	POS	NEG	40	POS	NEG	0.125	-3	2	1	16	4	0.0625	-4	128	7	8	3	BR
Beni	4601.7	POS	1280	POS	POS	10240	POS	POS	640	POS	POS	160	POS	NEG	0.125	-3	2	1	8	3	0.0625	-4	64	6	4	2	BR
Beni	1145.7	POS	640	POS	POS	640	POS	POS	640	POS	POS	40	POS	NEG	1	0	1	0	16	4	1	0	16	4	16	4	BP
Beni	3313.9	POS	1280	POS	POS	2560	POS	POS	320	POS	NEG	80	POS	NEG	0.5	-1	4	2	16	4	0.125	-3	32	5	4	2	BR
Beni	1745.2	POS	640	POS	POS	320	POS	NEG	160	POS	NEG	40	POS	NEG	2	1	4	2	16	4	0.5	-1	8	3	4	2	BP
Beni	4409.3	POS	2560	POS	POS	10240	POS	POS	640	POS	POS	160	POS	NEG	0.25	-2	4	2	16	4	0.0625	-4	64	6	4	2	BR
Beni	690.04	POS	640	POS	POS	2560	POS	POS	160	POS	NEG	80	POS	NEG	0.25	-2	4	2	8	3	0.0625	-4	32	5	2	1	BR
Beni	246.54	POS	160	POS	NEG	80	POS	NEG	80	POS	NEG	20	POS	NEG	2	1	2	1	8	3	1	0	4	2	4	2	BP
Beni	97.172	POS	320	POS	NEG	160	POS	NEG	40	POS	NEG	10	NEG	NEG	2	1	8	3	32	5	0.25	-2	16	4	4	2	BP
Beni	969.22	POS	640	POS	POS	1280	POS	POS	80	POS	NEG	20	POS	NEG	0.5	-1	8	3	32	5	0.0625	-4	64	6	4	2	BR
Beni	30.047	DOU	20	POS	NEG	40	POS	NEG	20	POS	NEG	10	NEG	NEG	0.5	-1	1	0	2	1	0.5	-1	4	2	2	1	BR
Beni	1722.1	POS	640	POS	POS	5120	POS	POS	640	POS	POS	40	POS	NEG	0.125	-3	1	0	16	4	0.125	-3	128	7	16	4	BR
Beni	51.692	POS	20	POS	NEG	40	POS	NEG	10	NEG	NEG	10	NEG	NEG	0.5	-1	2	1	2	1	0.25	-2	4	2	1	0	BR
Beni	1479.4	POS	160	POS	NEG	320	POS	NEG	80	POS	NEG	40	POS	NEG	0.5	-1	2	1	4	2	0.25	-2	8	3	2	1	BR
Beni	504.7	POS	320	POS	NEG	640	POS	POS	80	POS	NEG	80	POS	NEG	0.5	-1	4	2	4	2	0.125	-3	8	3	1	0	BR
Beni	24.678	NEG	10	NEG	NEG	40	POS	NEG	10	NEG	NEG	10	NEG	NEG	0.25	-2	1	0	1	0	0.25	-2	4	2	1	0	NEG_ELISA
Beni	2642.5	POS	640	POS	POS	5120	POS	POS	320	POS	NEG	320	POS	NEG	0.125	-3	2	1	2	1	0.0625	-4	16	4	1	0	BR
Beni	88.158	POS	80	POS	NEG	40	POS	NEG	20	POS	NEG	10	NEG	NEG	2	1	4	2	8	3	0.5	-1	4	2	2	1	BP
Beni	1964.8	POS	1280	POS	POS	640	POS	POS	320	POS	NEG	20	POS	NEG	2	1	4	2	64	6	0.5	-1	32	5	16	4	BP
Beni	56.451	POS	40	POS	NEG	80	POS	NEG	10	NEG	NEG	10	NEG	NEG	0.5	-1	4	2	4	2	0.125	-3	8	3	1	0	BR
Beni	614.87	POS	160	POS	NEG	80	POS	NEG	80	POS	NEG	10	NEG	NEG	2	1	2	1	16	4	1	0	8	3	8	3	BP
Beni	805.93	POS	320	POS	NEG	320	POS	NEG	80	POS	NEG	20	POS	NEG	1	0	4	2	16	4	0.25	-2	16	4	4	2	BP
Beni	61.867	POS	80	POS	NEG	80	POS	NEG	10	NEG	NEG	10	NEG	NEG	1	0	8	3	8	3	0.125	-3	8	3	1	0	BP
Beni	33.969	DOU	40	POS	NEG	20	POS	NEG	10	NEG	NEG	10	NEG	NEG	2	1	4	2	4	2	0.5	-1	2	1	1	0	BP
Beni	50.544	POS	20	POS	NEG	20	POS	NEG	10	NEG	NEG	10	NEG	NEG	1	0	2	1	2	1	0.5	-1	2	1	1	0	BP
Beni	107.27	POS	20	POS	NEG	40	POS	NEG	40	POS	NEG	10	NEG	NEG	0.5	-1	0.5	-1	2	1	1	0	4	2	4	2	BR
Beni	88.699	POS	40	POS	NEG	10240	POS	POS	40	POS	NEG	10	NEG	NEG	0.00390625	-8	1	0	4	2	0.00390625	-8	1024	10	4	2	BR
Beni	229.86	POS	160	POS	NEG	1280	POS	POS	80	POS	NEG	10	NEG	NEG	0.125	-3	2	1	16	4	0.0625	-4	128	7	8	3	BR
Beni	4546.7	POS	1280	POS	POS	5120	POS	POS	1280	POS	POS	160	POS	NEG	0.25	-2	1	0	8	3	0.25	-2	32	5	8	3	BR
Beni	223.55	POS	160	POS	NEG	320	POS	NEG	20	POS	NEG	20	POS	NEG	0.5	-1	8	3	8	3	0.0625	-4	16	4	1	0	BR
Beni	1623.8	POS	1280	POS	POS	2560	POS	POS	320	POS	NEG	320	POS	NEG	0.5	-1	4	2	4	2	0.125	-3	8	3	1	0	BR
Beni	3082.2	POS	1280	POS	POS	1280	POS	POS	1280	POS	POS	160	POS	NEG	1	0	1	0	8	3	1	0	8	3	8	3	BP
Beni	668.97	POS	320	POS	NEG	640	POS	POS	80	POS	NEG	20	POS	NEG	0.5	-1	4	2	16	4	0.125	-3	32	5	4	2	BR
Beni	20.936	NEG	NR	NEG	NEG	NR	NEG	NEG	NR	NEG	NEG	NR	NEG	NEG													NEG_ELISA
Beni	13.451	NEG	NR	NEG	NEG	NR	NEG	NEG	NR	NEG	NEG	NR	NEG	NEG													NEG_ELISA
Beni	18.332	NEG	NR	NEG	NEG	NR	NEG	NEG	NR	NEG	NEG	NR	NEG	NEG													NEG_ELISA
Beni	205.97	POS	80	POS	NEG	40	POS	NEG	40	POS	NEG	10	NEG	NEG	2	1	2	1	8	3	1	0	4	2	4	2	BP
Beni	771.69	POS	320	POS	NEG	1280	POS	POS	160	POS	NEG	20	POS	NEG	0.25	-2	2	1	16	4	0.125	-3	64	6	8	3	BR
Beni	29.885	DOU	10	NEG	NEG	10	NEG	NEG	10	NEG	NEG	10	NEG	NEG	1	0	1	0	1	0	1	0	1	0	1	0	NEG
Beni	4.9898	NEG	NR	NEG	NEG	NR	NEG	NEG	NR	NEG	NEG	NR	NEG	NEG													NEG_ELISA
Beni	622.6	POS	320	POS	NEG	1280	POS	POS	160	POS	NEG	40	POS	NEG	0.25	-2	2	1	8	3	0.125	-3	32	5	4	2	BR
Beni	1024.5	POS	640	POS	POS	1280	POS	POS	320	POS	NEG	80	POS	NEG	0.5	-1	2	1	8	3	0.25	-2	16	4	4	2	BR
Beni	251.72	POS	160	POS	NEG	80	POS	NEG	320	POS	NEG	10	NEG	NEG	2	1	0.5	-1	16	4	4	2	8	3	32	5	IN
Beni	12.963	NEG	NR	NEG	NEG	NR	NEG	NEG	NR	NEG	NEG	NR	NEG	NEG													NEG_ELISA
Beni	634.2	POS	320	POS	NEG	160	POS	NEG	80	POS	NEG	10	NEG	NEG	2	1	4	2	32	5	0.5	-1	16	4	8	3	BP
Beni	1800.1	POS	640	POS	POS	2560	POS	POS	320	POS	NEG	40	POS	NEG	0.25	-2	2	1	16	4	0.125	-3	64	6	8	3	BR
Beni	2444.4	POS	1280	POS	POS	1280	POS	POS	320	POS	NEG	40	POS	NEG	1	0	4	2	32	5	0.25	-2	32	5	8	3	BP
Beni	122.59	POS	20	POS	NEG	10	NEG	NEG	10	NEG	NEG	10	NEG	NEG	2	1	2	1	2	1	1	0	1	0	1	0	BP
Beni	365.38	POS	80	POS	NEG	160	POS	NEG	40	POS	NEG	10	NEG	NEG	0.5	-1	2	1	8	3	0.25	-2	16	4	4	2	BR
Beni	4.1763	NEG	NR	NEG	NEG	NR	NEG	NEG	NR	NEG	NEG	NR	NEG	NEG													NEG_ELISA
Beni	147.15	POS	320	POS	NEG	160	POS	NEG	160	POS	NEG	80	POS	NEG	2	1	2	1	4	2	1	0	2	1	2	1	BP
Beni	1040.3	POS	640	POS	POS	1280	POS	POS	160	POS	NEG	80	POS	NEG	0.5	-1	4	2	8	3	0.125	-3	16	4	2	1	BR
Beni	3.12	NEG	NR	NEG	NEG	NR	NEG	NEG	NR	NEG	NEG	NR	NEG	NEG													NEG_ELISA
Beni	697.94	POS	160	POS	NEG	2560	POS	POS	80	POS	NEG	40	POS	NEG	0.0625	-4	2	1	4	2	0.03125	-5	64	6	2	1	BR
Beni	209.35	POS	320	POS	NEG	1280	POS	POS	160	POS	NEG	80	POS	NEG	0.25	-2	2	1	4	2	0.125	-3	16	4	2	1	BR
Beni	529.83	POS	160	POS	NEG	320	POS	NEG	40	POS	NEG	10	NEG	NEG	0.5	-1	4	2	16	4	0.125	-3	32	5	4	2	BR
Beni	7.5932	NEG	NR	NEG	NEG	NR	NEG	NEG	NR	NEG	NEG	NR	NEG	NEG													NEG_ELISA
Beni	162.93	POS	320	POS	NEG	320	POS	NEG	40	POS	NEG	10	NEG	NEG	1	0	8	3	32	5	0.125	-3	32	5	4	2	BP
Beni	98.073	POS	40	POS	NEG	320	POS	NEG	10	NEG	NEG	20	POS	NEG	0.125	-3	4	2	2	1	0.03125	-5	16	4	0.5	-1	BR
Beni	54.81	POS	160	POS	NEG	320	POS	NEG	10	NEG	NEG	10	NEG	NEG	0.5	-1	16	4	16	4	0.03125	-5	32	5	1	0	BR
Beni	3.5254	NEG	NR	NEG	NEG	NR	NEG	NEG	NR	NEG	NEG	NR	NEG	NEG													NEG_ELISA
Beni	3090.1	POS	160	POS	NEG	640	POS	POS	80	POS	NEG	40	POS	NEG	0.25	-2	2	1	4	2	0.125	-3	16	4	2	1	BR
Beni	848.07	POS	320	POS	NEG	160	POS	NEG	80	POS	NEG	10	NEG	NEG	2	1	4	2	32	5	0.5	-1	16	4	8	3	BP
Beni	1961.9	POS	640	POS	POS	2560	POS	POS	1280	POS	POS	80	POS	NEG	0.25	-2	0.5	-1	8	3	0.5	-1	32	5	16	4	BR
Beni	568.48	POS	160	POS	NEG	640	POS	POS	40	POS	NEG	20	POS	NEG	0.25	-2	4	2	8	3	0.0625	-4	32	5	2	1	BR
Beni	479.57	POS	320	POS	NEG	640	POS	POS	160	POS	NEG	80	POS	NEG	0.5	-1	2	1	4	2	0.25	-2	8	3	2	1	BR
Beni	215.66	POS	320	POS	NEG	160	POS	NEG	80	POS	NEG	10	NEG	NEG	2	1	4	2	32	5	0.5	-1	16	4	8	3	BP
Beni	223.55	POS	320	POS	NEG	160	POS	NEG	160	POS	NEG	10	NEG	NEG	2	1	2	1	32	5	1	0	16	4	16	4	BP
Beni	2803.4	POS	1280	POS	POS	2560	POS	POS	640	POS	POS	80	POS	NEG	0.5	-1	2	1	16	4	0.25	-2	32	5	8	3	BR
Beni	293.93	POS	160	POS	NEG	80	POS	NEG	40	POS	NEG	10	NEG	NEG	2	1	4	2	16	4	0.5	-1	8	3	4	2	BP
Beni	877.04	POS	320	POS	NEG	160	POS	NEG	160	POS	NEG	40	POS	NEG	2	1	2	1	8	3	1	0	4	2	4	2	BP
Beni	574.28	POS	320	POS	NEG	640	POS	POS	160	POS	NEG	40	POS	NEG	0.5	-1	2	1	8	3	0.25	-2	16	4	4	2	BR
Beni	278.69	POS	320	POS	NEG	320	POS	NEG	160	POS	NEG	20	POS	NEG	1	0	2	1	16	4	0.5	-1	16	4	8	3	BP
Beni	5.1525	NEG	NR	NEG	NEG	NR	NEG	NEG	NR	NEG	NEG	NR	NEG	NEG													NEG_ELISA
Beni	3121.5	POS	1280	POS	POS	5120	POS	POS	320	POS	NEG	160	POS	NEG	0.25	-2	4	2	8	3	0.0625	-4	32	5	2	1	BR
Beni	2077.5	POS	320	POS	NEG	1280	POS	POS	320	POS	NEG	20	POS	NEG	0.25	-2	1	0	16	4	0.25	-2	64	6	16	4	BR
Beni	146.25	POS	40	POS	NEG	160	POS	NEG	40	POS	NEG	10	NEG	NEG	0.25	-2	1	0	4	2	0.25	-2	16	4	4	2	BR
Beni	95.73	POS	20	POS	NEG	20	POS	NEG	10	NEG	NEG	10	NEG	NEG	1	0	2	1	2	1	0.5	-1	2	1	1	0	BP
Beni	1245.8	POS	320	POS	NEG	1280	POS	POS	160	POS	NEG	160	POS	NEG	0.25	-2	2	1	2	1	0.125	-3	8	3	1	0	BR
Beni	253.52	POS	160	POS	NEG	160	POS	NEG	40	POS	NEG	10	NEG	NEG	1	0	4	2	16	4	0.25	-2	16	4	4	2	BP
Beni	591.68	POS	80	POS	NEG	640	POS	POS	40	POS	NEG	10	NEG	NEG	0.125	-3	2	1	8	3	0.0625	-4	64	6	4	2	BR
Beni	945.51	POS	320	POS	NEG	640	POS	POS	320	POS	NEG	80	POS	NEG	0.5	-1	1	0	4	2	0.5	-1	8	3	4	2	BR
Beni	3557.3	POS	2560	POS	POS	5120	POS	POS	2560	POS	POS	320	POS	NEG	0.5	-1	1	0	8	3	0.5	-1	16	4	8	3	BR
Beni	212.06	POS	80	POS	NEG	320	POS	NEG	160	POS	NEG	20	POS	NEG	0.25	-2	0.5	-1	4	2	0.5	-1	16	4	8	3	BR
Beni	29.071	DOU	10	NEG	NEG	10	NEG	NEG	10	NEG	NEG	10	NEG	NEG	1	0	1	0	1	0	1	0	1	0	1	0	NEG
Beni	122.23	POS	80	POS	NEG	160	POS	NEG	80	POS	NEG	10	NEG	NEG	0.5	-1	1	0	8	3	0.5	-1	16	4	8	3	BR
Beni	4389.7	POS	1280	POS	POS	5120	POS	POS	1280	POS	POS	320	POS	NEG	0.25	-2	1	0	4	2	0.25	-2	16	4	4	2	BR
Beni	211.83	POS	320	POS	NEG	160	POS	NEG	80	POS	NEG	20	POS	NEG	2	1	4	2	16	4	0.5	-1	8	3	4	2	BP
Beni	227.38	POS	80	POS	NEG	320	POS	NEG	40	POS	NEG	10	NEG	NEG	0.25	-2	2	1	8	3	0.125	-3	32	5	4	2	BR
Beni	2230.6	POS	640	POS	POS	5120	POS	POS	640	POS	POS	80	POS	NEG	0.125	-3	1	0	8	3	0.125	-3	64	6	8	3	BR
Beni	148.06	POS	40	POS	NEG	80	POS	NEG	20	POS	NEG	10	NEG	NEG	0.5	-1	2	1	4	2	0.25	-2	8	3	2	1	BR
Beni	167.66	POS	160	POS	NEG	80	POS	NEG	40	POS	NEG	10	NEG	NEG	2	1	4	2	16	4	0.5	-1	8	3	4	2	BP
Beni	68.544	POS	80	POS	NEG	40	POS	NEG	20	POS	NEG	10	NEG	NEG	2	1	4	2	8	3	0.5	-1	4	2	2	1	BP
Beni	8.6	NEG	NR	NEG	NEG	NR	NEG	NEG	NR	NEG	NEG	NR	NEG	NEG													NEG_ELISA
Beni	1277.4	POS	320	POS	NEG	2560	POS	POS	160	POS	NEG	20	POS	NEG	0.125	-3	2	1	16	4	0.0625	-4	128	7	8	3	BR
Beni	224.83	POS	80	POS	NEG	2560	POS	POS	80	POS	NEG	10	NEG	NEG	0.03125	-5	1	0	8	3	0.03125	-5	256	8	8	3	BR
Beni	186.17	POS	10	NEG	NEG	10	NEG	NEG	10	NEG	NEG	10	NEG	NEG	1	0	1	0	1	0	1	0	1	0	1	0	NEG
Beni	60.346	POS	20	POS	NEG	160	POS	NEG	40	POS	NEG	10	NEG	NEG	0.125	-3	0.5	-1	2	1	0.25	-2	16	4	4	2	BR
Beni	239.11	POS	160	POS	NEG	20480	POS	POS	80	POS	NEG	10	NEG	NEG	0.0078125	-7	2	1	16	4	0.00390625	-8	2048	11	8	3	BR
Beni	248.51	POS	80	POS	NEG	1280	POS	POS	80	POS	NEG	10	NEG	NEG	0.0625	-4	1	0	8	3	0.0625	-4	128	7	8	3	BR
Beni	179.9	POS	80	POS	NEG	80	POS	NEG	40	POS	NEG	10	NEG	NEG	1	0	2	1	8	3	0.5	-1	8	3	4	2	BP
Beni	57.799	POS	80	POS	NEG	40	POS	NEG	40	POS	NEG	10	NEG	NEG	2	1	2	1	8	3	1	0	4	2	4	2	BP
Beni	241.72	POS	160	POS	NEG	80	POS	NEG	160	POS	NEG	10	NEG	NEG	2	1	1	0	16	4	2	1	8	3	16	4	BP
Beni	1618.1	POS	640	POS	POS	1280	POS	POS	640	POS	POS	160	POS	NEG	0.5	-1	1	0	4	2	0.5	-1	8	3	4	2	BR
Beni	7.2737	NEG	NR	NEG	NEG	NR	NEG	NEG	NR	NEG	NEG	NR	NEG	NEG													NEG_ELISA
Beni	58.796	POS	20	POS	NEG	320	POS	NEG	10	NEG	NEG	10	NEG	NEG	0.0625	-4	2	1	2	1	0.03125	-5	32	5	1	0	BR
Beni	118.78	POS	80	POS	NEG	1280	POS	POS	80	POS	NEG	10	NEG	NEG	0.0625	-4	1	0	8	3	0.0625	-4	128	7	8	3	BR
Beni	68.284	POS	40	POS	NEG	640	POS	POS	40	POS	NEG	10	NEG	NEG	0.0625	-4	1	0	4	2	0.0625	-4	64	6	4	2	BR
Beni	14.853	NEG	NR	NEG	NEG	NR	NEG	NEG	NR	NEG	NEG	NR	NEG	NEG													NEG_ELISA
Beni	117.61	POS	160	POS	NEG	160	POS	NEG	40	POS	NEG	10	NEG	NEG	1	0	4	2	16	4	0.25	-2	16	4	4	2	BP
Beni	12.2	NEG	NR	NEG	NEG	NR	NEG	NEG	NR	NEG	NEG	NR	NEG	NEG													NEG_ELISA
Beni	48.609	POS	20	POS	NEG	80	POS	NEG	10	NEG	NEG	10	NEG	NEG	0.25	-2	2	1	2	1	0.125	-3	8	3	1	0	BR
Beni	253.39	POS	160	POS	NEG	640	POS	POS	80	POS	NEG	10	NEG	NEG	0.25	-2	2	1	16	4	0.125	-3	64	6	8	3	BR
Beni	94.897	POS	40	POS	NEG	320	POS	NEG	10	NEG	NEG	10	NEG	NEG	0.125	-3	4	2	4	2	0.03125	-5	32	5	1	0	BR
Beni	1185.2	POS	160	POS	NEG	640	POS	POS	160	POS	NEG	10	NEG	NEG	0.25	-2	1	0	16	4	0.25	-2	64	6	16	4	BR
Beni	2444.4	POS	640	POS	POS	10240	POS	POS	640	POS	POS	40	POS	NEG	0.0625	-4	1	0	16	4	0.0625	-4	256	8	16	4	BR
Beni	37.204	POS	10	NEG	NEG	40	POS	NEG	40	POS	NEG	10	NEG	NEG	0.25	-2	0.25	-2	1	0	1	0	4	2	4	2	BR
Beni	1174.7	POS	320	POS	NEG	5120	POS	POS	80	POS	NEG	80	POS	NEG	0.0625	-4	4	2	4	2	0.015625	-6	64	6	1	0	BR
Beni	1381.1	POS	1280	POS	POS	640	POS	POS	320	POS	NEG	160	POS	NEG	2	1	4	2	8	3	0.5	-1	4	2	2	1	BP
Beni	7.1789	NEG	NR	NEG	NEG	NR	NEG	NEG	NR	NEG	NEG	NR	NEG	NEG													NEG_ELISA
Beni	603.28	POS	160	POS	NEG	640	POS	POS	80	POS	NEG	20	POS	NEG	0.25	-2	2	1	8	3	0.125	-3	32	5	4	2	BR
Cochabamba	5332.1	POS	2560	POS	POS	5120	POS	POS	5120	POS	POS	160	POS	NEG	0.5	-1	0.5	-1	16	4	1	0	32	5	32	5	BR
Cochabamba	1410.6	POS	320	POS	NEG	640	POS	POS	320	POS	NEG	10	NEG	NEG	0.5	-1	1	0	32	5	0.5	-1	64	6	32	5	BR
Cochabamba	181.84	POS	80	POS	NEG	160	POS	NEG	10	NEG	NEG	10	NEG	NEG	0.5	-1	8	3	8	3	0.0625	-4	16	4	1	0	BR
Cochabamba	491	POS	80	POS	NEG	160	POS	NEG	40	POS	NEG	10	NEG	NEG	0.5	-1	2	1	8	3	0.25	-2	16	4	4	2	BR
Cochabamba	323.79	POS	80	POS	NEG	160	POS	NEG	40	POS	NEG	10	NEG	NEG	0.5	-1	2	1	8	3	0.25	-2	16	4	4	2	BR
Cochabamba	170.08	POS	10	NEG	NEG	20	POS	NEG	10	NEG	NEG	10	NEG	NEG	0.5	-1	1	0	1	0	0.5	-1	2	1	1	0	BR
Cochabamba	11738	POS	5120	POS	POS	10240	POS	POS	5120	POS	POS	160	POS	NEG	0.5	-1	1	0	32	5	0.5	-1	64	6	32	5	BR
Cochabamba	50.006	POS	640	POS	POS	320	POS	NEG	160	POS	NEG	10	NEG	NEG	2	1	4	2	64	6	0.5	-1	32	5	16	4	BP
Cochabamba	186.52	POS	80	POS	NEG	160	POS	NEG	40	POS	NEG	10	NEG	NEG	0.5	-1	2	1	8	3	0.25	-2	16	4	4	2	BR
Cochabamba	7.8619	NEG	NR	NEG	NEG	NR	NEG	NEG	NR	NEG	NEG	NR	NEG	NEG													NEG_ELISA
Cochabamba	131.87	POS	20	POS	NEG	40	POS	NEG	10	NEG	NEG	10	NEG	NEG	0.5	-1	2	1	2	1	0.25	-2	4	2	1	0	BR
Cochabamba	5.9971	NEG	NR	NEG	NEG	NR	NEG	NEG	NR	NEG	NEG	NR	NEG	NEG													NEG_ELISA
Cochabamba	312	POS	20	POS	NEG	80	POS	NEG	80	POS	NEG	10	NEG	NEG	0.25	-2	0.25	-2	2	1	1	0	8	3	8	3	BR
Cochabamba	40.129	POS	10	NEG	NEG	10	NEG	NEG	10	NEG	NEG	10	NEG	NEG	1	0	1	0	1	0	1	0	1	0	1	0	NEG
Cochabamba	16476	POS	2560	POS	POS	5120	POS	POS	5120	POS	POS	320	POS	NEG	0.5	-1	0.5	-1	8	3	1	0	16	4	16	4	BR
Cochabamba	52.682	POS	10	NEG	NEG	10	NEG	NEG	10	NEG	NEG	10	NEG	NEG	1	0	1	0	1	0	1	0	1	0	1	0	NEG
Cochabamba	213.12	POS	10	NEG	NEG	10	NEG	NEG	10	NEG	NEG	10	NEG	NEG	1	0	1	0	1	0	1	0	1	0	1	0	NEG
Cochabamba	316	POS	40	POS	NEG	160	POS	NEG	40	POS	NEG	10	NEG	NEG	0.25	-2	1	0	4	2	0.25	-2	16	4	4	2	BR
Cochabamba	208.77	POS	160	POS	NEG	320	POS	NEG	40	POS	NEG	10	NEG	NEG	0.5	-1	4	2	16	4	0.125	-3	32	5	4	2	BR
Cochabamba	709.82	POS	80	POS	NEG	160	POS	NEG	40	POS	NEG	10	NEG	NEG	0.5	-1	2	1	8	3	0.25	-2	16	4	4	2	BR
Cochabamba	13.145	NEG	NR	NEG	NEG	NR	NEG	NEG	NR	NEG	NEG	NR	NEG	NEG													NEG_ELISA
Cochabamba	1163.6	POS	640	POS	POS	320	POS	NEG	320	POS	NEG	20	POS	NEG	2	1	2	1	32	5	1	0	16	4	16	4	BP
Cochabamba	58.958	POS	10	NEG	NEG	40	POS	NEG	10	NEG	NEG	10	NEG	NEG	0.25	-2	1	0	1	0	0.25	-2	4	2	1	0	BR
Cochabamba	1319.2	POS	160	POS	NEG	320	POS	NEG	160	POS	NEG	10	NEG	NEG	0.5	-1	1	0	16	4	0.5	-1	32	5	16	4	BR
Cochabamba	2040.8	POS	1280	POS	POS	640	POS	POS	1280	POS	POS	160	POS	NEG	2	1	1	0	8	3	2	1	4	2	8	3	BP
Cochabamba	1021.1	POS	640	POS	POS	1280	POS	POS	640	POS	POS	80	POS	NEG	0.5	-1	1	0	8	3	0.5	-1	16	4	8	3	BR
Cochabamba	236.98	POS	40	POS	NEG	160	POS	NEG	10	NEG	NEG	10	NEG	NEG	0.25	-2	4	2	4	2	0.0625	-4	16	4	1	0	BR
Cochabamba	2630.2	POS	640	POS	POS	320	POS	NEG	320	POS	NEG	10	NEG	NEG	2	1	2	1	64	6	1	0	32	5	32	5	BP
Cochabamba	983.27	POS	320	POS	NEG	640	POS	POS	80	POS	NEG	20	POS	NEG	0.5	-1	4	2	16	4	0.125	-3	32	5	4	2	BR
Cochabamba	58.135	POS	20	POS	NEG	40	POS	NEG	20	POS	NEG	10	NEG	NEG	0.5	-1	1	0	2	1	0.5	-1	4	2	2	1	BR
Cochabamba	11335	POS	5120	POS	POS	10240	POS	POS	1280	POS	POS	640	POS	POS	0.5	-1	4	2	8	3	0.125	-3	16	4	2	1	BR
Cochabamba	1274.2	POS	80	POS	NEG	160	POS	NEG	40	POS	NEG	10	NEG	NEG	0.5	-1	2	1	8	3	0.25	-2	16	4	4	2	BR
Cochabamba	177.97	POS	80	POS	NEG	40	POS	NEG	20	POS	NEG	10	NEG	NEG	2	1	4	2	8	3	0.5	-1	4	2	2	1	BP
Cochabamba	370.95	POS	160	POS	NEG	640	POS	POS	80	POS	NEG	20	POS	NEG	0.25	-2	2	1	8	3	0.125	-3	32	5	4	2	BR
Cochabamba	169.75	POS	80	POS	NEG	160	POS	NEG	80	POS	NEG	10	NEG	NEG	0.5	-1	1	0	8	3	0.5	-1	16	4	8	3	BR
Cochabamba	158.79	POS	160	POS	NEG	640	POS	POS	160	POS	NEG	10	NEG	NEG	0.25	-2	1	0	16	4	0.25	-2	64	6	16	4	BR
Cochabamba	597.75	POS	80	POS	NEG	320	POS	NEG	20	POS	NEG	10	NEG	NEG	0.25	-2	4	2	8	3	0.0625	-4	32	5	2	1	BR
Cochabamba	158.63	POS	10	NEG	NEG	10	NEG	NEG	10	NEG	NEG	10	NEG	NEG	1	0	1	0	1	0	1	0	1	0	1	0	NEG
Cochabamba	270.11	POS	20	POS	NEG	160	POS	NEG	20	POS	NEG	10	NEG	NEG	0.125	-3	1	0	2	1	0.125	-3	16	4	2	1	BR
Cochabamba	372	POS	320	POS	NEG	640	POS	POS	40	POS	NEG	10	NEG	NEG	0.5	-1	8	3	32	5	0.0625	-4	64	6	4	2	BR
Cochabamba	3.16	NEG	NR	NEG	NEG	NR	NEG	NEG	NR	NEG	NEG	NR	NEG	NEG													NEG_ELISA
Cochabamba	17.289	NEG	NR	NEG	NEG	NR	NEG	NEG	NR	NEG	NEG	NR	NEG	NEG													NEG_ELISA
Cochabamba	33.852	DOU	10	NEG	NEG	10	NEG	NEG	10	NEG	NEG	10	NEG	NEG	1	0	1	0	1	0	1	0	1	0	1	0	NEG
Cochabamba	6966.5	POS	10240	POS	POS	5120	POS	POS	5120	POS	POS	160	POS	NEG	2	1	2	1	64	6	1	0	32	5	32	5	BP
Cochabamba	2995.2	POS	1280	POS	POS	2560	POS	POS	320	POS	NEG	20	POS	NEG	0.5	-1	4	2	64	6	0.125	-3	128	7	16	4	BR
Cochabamba	191.36	POS	40	POS	NEG	160	POS	NEG	10	NEG	NEG	10	NEG	NEG	0.25	-2	4	2	4	2	0.0625	-4	16	4	1	0	BR
Cochabamba	2808	POS	2560	POS	POS	5120	POS	POS	640	POS	POS	40	POS	NEG	0.5	-1	4	2	64	6	0.125	-3	128	7	16	4	BR
Cochabamba	56.18	POS	20	POS	NEG	80	POS	NEG	10	NEG	NEG	10	NEG	NEG	0.25	-2	2	1	2	1	0.125	-3	8	3	1	0	BR
Cochabamba	933.82	POS	80	POS	NEG	160	POS	NEG	20	POS	NEG	10	NEG	NEG	0.5	-1	4	2	8	3	0.125	-3	16	4	2	1	BR
Cochabamba	1632.7	POS	320	POS	NEG	1280	POS	POS	320	POS	NEG	40	POS	NEG	0.25	-2	1	0	8	3	0.25	-2	32	5	8	3	BR
Cochabamba	317.26	POS	320	POS	NEG	640	POS	POS	40	POS	NEG	10	NEG	NEG	0.5	-1	8	3	32	5	0.0625	-4	64	6	4	2	BR
Cochabamba	355.79	POS	80	POS	NEG	320	POS	NEG	10	NEG	NEG	10	NEG	NEG	0.25	-2	8	3	8	3	0.03125	-5	32	5	1	0	BR
Cochabamba	30.757	DOU	10	NEG	NEG	20	POS	NEG	10	NEG	NEG	10	NEG	NEG	0.5	-1	1	0	1	0	0.5	-1	2	1	1	0	BR
Cochabamba	2962.5	POS	1280	POS	POS	5120	POS	POS	1280	POS	POS	160	POS	NEG	0.25	-2	1	0	8	3	0.25	-2	32	5	8	3	BR
Cochabamba	159.11	POS	80	POS	NEG	160	POS	NEG	40	POS	NEG	10	NEG	NEG	0.5	-1	2	1	8	3	0.25	-2	16	4	4	2	BR
Cochabamba	544.37	POS	80	POS	NEG	320	POS	NEG	40	POS	NEG	10	NEG	NEG	0.25	-2	2	1	8	3	0.125	-3	32	5	4	2	BR
Cochabamba	588.85	POS	160	POS	NEG	320	POS	NEG	80	POS	NEG	10	NEG	NEG	0.5	-1	2	1	16	4	0.25	-2	32	5	8	3	BR
Cochabamba	277.89	POS	80	POS	NEG	160	POS	NEG	40	POS	NEG	10	NEG	NEG	0.5	-1	2	1	8	3	0.25	-2	16	4	4	2	BR
Cochabamba	9600	POS	5120	POS	POS	40960	POS	POS	2560	POS	POS	160	POS	NEG	0.125	-3	2	1	32	5	0.0625	-4	256	8	16	4	BR
Cochabamba	1325.7	POS	640	POS	POS	1280	POS	POS	2560	POS	POS	20	POS	NEG	0.5	-1	0.25	-2	32	5	2	1	64	6	128	7	IN
Cochabamba	9.8302	NEG	NR	NEG	NEG	NR	NEG	NEG	NR	NEG	NEG	NR	NEG	NEG													NEG_ELISA
Cochabamba	3.19	NEG	NR	NEG	NEG	NR	NEG	NEG	NR	NEG	NEG	NR	NEG	NEG													NEG_ELISA
Cochabamba	1186.9	POS	320	POS	NEG	1280	POS	POS	80	POS	NEG	20	POS	NEG	0.25	-2	4	2	16	4	0.0625	-4	64	6	4	2	BR
Cochabamba	5.2719	NEG	NR	NEG	NEG	NR	NEG	NEG	NR	NEG	NEG	NR	NEG	NEG													NEG_ELISA
Cochabamba	2560	POS	1280	POS	POS	5120	POS	POS	320	POS	NEG	160	POS	NEG	0.25	-2	4	2	8	3	0.0625	-4	32	5	2	1	BR
Cochabamba	1596.7	POS	1280	POS	POS	2560	POS	POS	640	POS	POS	20	POS	NEG	0.5	-1	2	1	64	6	0.25	-2	128	7	32	5	BR
Cochabamba	118.39	POS	80	POS	NEG	160	POS	NEG	20	POS	NEG	10	NEG	NEG	0.5	-1	4	2	8	3	0.125	-3	16	4	2	1	BR
Cochabamba	153.63	POS	40	POS	NEG	160	POS	NEG	10	NEG	NEG	10	NEG	NEG	0.25	-2	4	2	4	2	0.0625	-4	16	4	1	0	BR
Cochabamba	70.321	POS	80	POS	NEG	160	POS	NEG	40	POS	NEG	10	NEG	NEG	0.5	-1	2	1	8	3	0.25	-2	16	4	4	2	BR
Cochabamba	158.79	POS	40	POS	NEG	160	POS	NEG	20	POS	NEG	10	NEG	NEG	0.25	-2	2	1	4	2	0.125	-3	16	4	2	1	BR
Cochabamba	750.55	POS	80	POS	NEG	40	POS	NEG	10	NEG	NEG	10	NEG	NEG	2	1	8	3	8	3	0.25	-2	4	2	1	0	BP
Cochabamba	122.07	POS	160	POS	NEG	320	POS	NEG	20	POS	NEG	10	NEG	NEG	0.5	-1	8	3	16	4	0.0625	-4	32	5	2	1	BR
Cochabamba	87.835	POS	10	NEG	NEG	80	POS	NEG	10	NEG	NEG	10	NEG	NEG	0.125	-3	1	0	1	0	0.125	-3	8	3	1	0	BR
Cochabamba	328.84	POS	80	POS	NEG	160	POS	NEG	20	POS	NEG	10	NEG	NEG	0.5	-1	4	2	8	3	0.125	-3	16	4	2	1	BR
Cochabamba	298.11	POS	10	NEG	NEG	40	POS	NEG	20	POS	NEG	10	NEG	NEG	0.25	-2	0.5	-1	1	0	0.5	-1	4	2	2	1	BR
Cochabamba	6551.9	POS	5120	POS	POS	10240	POS	POS	1280	POS	POS	160	POS	NEG	0.5	-1	4	2	32	5	0.125	-3	64	6	8	3	BR
Cochabamba	80.988	POS	40	POS	NEG	40	POS	NEG	10	NEG	NEG	10	NEG	NEG	1	0	4	2	4	2	0.25	-2	4	2	1	0	BP
Cochabamba	133.48	POS	80	POS	NEG	160	POS	NEG	20	POS	NEG	10	NEG	NEG	0.5	-1	4	2	8	3	0.125	-3	16	4	2	1	BR
Cochabamba	44.965	POS	20	POS	NEG	80	POS	NEG	10	NEG	NEG	10	NEG	NEG	0.25	-2	2	1	2	1	0.125	-3	8	3	1	0	BR
Cochabamba	111.67	POS	40	POS	NEG	160	POS	NEG	10	NEG	NEG	10	NEG	NEG	0.25	-2	4	2	4	2	0.0625	-4	16	4	1	0	BR
Cochabamba	660.36	POS	80	POS	NEG	320	POS	NEG	40	POS	NEG	10	NEG	NEG	0.25	-2	2	1	8	3	0.125	-3	32	5	4	2	BR
Cochabamba	875.64	POS	320	POS	NEG	640	POS	POS	80	POS	NEG	20	POS	NEG	0.5	-1	4	2	16	4	0.125	-3	32	5	4	2	BR
Cochabamba	109.43	POS	80	POS	NEG	40	POS	NEG	20	POS	NEG	10	NEG	NEG	2	1	4	2	8	3	0.5	-1	4	2	2	1	BP
Cochabamba	1773.1	POS	640	POS	POS	5120	POS	POS	160	POS	NEG	40	POS	NEG	0.125	-3	4	2	16	4	0.03125	-5	128	7	4	2	BR
Cochabamba	15.424	NEG	NR	NEG	NEG	NR	NEG	NEG	NR	NEG	NEG	NR	NEG	NEG													NEG_ELISA
Cochabamba	382.95	POS	80	POS	NEG	160	POS	NEG	40	POS	NEG	10	NEG	NEG	0.5	-1	2	1	8	3	0.25	-2	16	4	4	2	BR
Cochabamba	249.07	POS	40	POS	NEG	160	POS	NEG	20	POS	NEG	10	NEG	NEG	0.25	-2	2	1	4	2	0.125	-3	16	4	2	1	BR
Cochabamba	125.89	POS	10	NEG	NEG	10	NEG	NEG	10	NEG	NEG	10	NEG	NEG	1	0	1	0	1	0	1	0	1	0	1	0	NEG
Cochabamba	28.43	DOU	20	POS	NEG	80	POS	NEG	20	POS	NEG	10	NEG	NEG	0.25	-2	1	0	2	1	0.25	-2	8	3	2	1	BR
Cochabamba	369.08	POS	80	POS	NEG	160	POS	NEG	40	POS	NEG	10	NEG	NEG	0.5	-1	2	1	8	3	0.25	-2	16	4	4	2	BR
Cochabamba	37.939	POS	10	NEG	NEG	20	POS	NEG	10	NEG	NEG	10	NEG	NEG	0.5	-1	1	0	1	0	0.5	-1	2	1	1	0	BR
Cochabamba	99.241	POS	40	POS	NEG	80	POS	NEG	40	POS	NEG	10	NEG	NEG	0.5	-1	1	0	4	2	0.5	-1	8	3	4	2	BR
Cochabamba	4118.5	POS	2560	POS	POS	10240	POS	POS	2560	POS	POS	80	POS	NEG	0.25	-2	1	0	32	5	0.25	-2	128	7	32	5	BR
Cochabamba	577.73	POS	160	POS	NEG	320	POS	NEG	80	POS	NEG	10	NEG	NEG	0.5	-1	2	1	16	4	0.25	-2	32	5	8	3	BR
Cochabamba	97.485	POS	10	NEG	NEG	40	POS	NEG	10	NEG	NEG	10	NEG	NEG	0.25	-2	1	0	1	0	0.25	-2	4	2	1	0	BR
Cochabamba	1528.2	POS	320	POS	NEG	640	POS	POS	80	POS	NEG	40	POS	NEG	0.5	-1	4	2	8	3	0.125	-3	16	4	2	1	BR
Cochabamba	1436.7	POS	1280	POS	POS	1280	POS	POS	1280	POS	POS	20	POS	NEG	1	0	1	0	64	6	1	0	64	6	64	6	BP
Cochabamba	127.73	POS	80	POS	NEG	160	POS	NEG	40	POS	NEG	10	NEG	NEG	0.5	-1	2	1	8	3	0.25	-2	16	4	4	2	BR
Cochabamba	1495.5	POS	1280	POS	POS	2560	POS	POS	1280	POS	POS	80	POS	NEG	0.5	-1	1	0	16	4	0.5	-1	32	5	16	4	BR
Cochabamba	232.38	POS	80	POS	NEG	160	POS	NEG	80	POS	NEG	10	NEG	NEG	0.5	-1	1	0	8	3	0.5	-1	16	4	8	3	BR
Cochabamba	154.86	POS	160	POS	NEG	320	POS	NEG	80	POS	NEG	10	NEG	NEG	0.5	-1	2	1	16	4	0.25	-2	32	5	8	3	BR
Cochabamba	190.29	POS	160	POS	NEG	320	POS	NEG	320	POS	NEG	10	NEG	NEG	0.5	-1	0.5	-1	16	4	1	0	32	5	32	5	BR
Cochabamba	1472.7	POS	640	POS	POS	1280	POS	POS	320	POS	NEG	20	POS	NEG	0.5	-1	2	1	32	5	0.25	-2	64	6	16	4	BR
Cochabamba	178.48	POS	80	POS	NEG	160	POS	NEG	40	POS	NEG	10	NEG	NEG	0.5	-1	2	1	8	3	0.25	-2	16	4	4	2	BR
Cochabamba	1358.4	POS	640	POS	POS	640	POS	POS	80	POS	NEG	20	POS	NEG	1	0	8	3	32	5	0.125	-3	32	5	4	2	BP
Cochabamba	3.16	NEG	NR	NEG	NEG	NR	NEG	NEG	NR	NEG	NEG	NR	NEG	NEG													NEG_ELISA
Cochabamba	3.11	NEG	NR	NEG	NEG	NR	NEG	NEG	NR	NEG	NEG	NR	NEG	NEG													NEG_ELISA
Cochabamba	69.941	POS	40	POS	NEG	160	POS	NEG	10	NEG	NEG	10	NEG	NEG	0.25	-2	4	2	4	2	0.0625	-4	16	4	1	0	BR
Cochabamba	32.364	DOU	20	POS	NEG	40	POS	NEG	20	POS	NEG	10	NEG	NEG	0.5	-1	1	0	2	1	0.5	-1	4	2	2	1	BR
Cochabamba	23.669	NEG	10	NEG	NEG	80	POS	NEG	10	NEG	NEG	10	NEG	NEG	0.125	-3	1	0	1	0	0.125	-3	8	3	1	0	NEG_ELISA
Cochabamba	175.62	POS	20	POS	NEG	80	POS	NEG	10	NEG	NEG	10	NEG	NEG	0.25	-2	2	1	2	1	0.125	-3	8	3	1	0	BR
Cochabamba	922.18	POS	640	POS	POS	1280	POS	POS	160	POS	NEG	20	POS	NEG	0.5	-1	4	2	32	5	0.125	-3	64	6	8	3	BR
Cochabamba	230.1	POS	160	POS	NEG	320	POS	NEG	160	POS	NEG	10	NEG	NEG	0.5	-1	1	0	16	4	0.5	-1	32	5	16	4	BR
Cochabamba	207.24	POS	80	POS	NEG	320	POS	NEG	160	POS	NEG	10	NEG	NEG	0.25	-2	0.5	-1	8	3	0.5	-1	32	5	16	4	BR
Cochabamba	133.52	POS	80	POS	NEG	160	POS	NEG	40	POS	NEG	10	NEG	NEG	0.5	-1	2	1	8	3	0.25	-2	16	4	4	2	BR
Cochabamba	239.05	POS	160	POS	NEG	640	POS	POS	80	POS	NEG	20	POS	NEG	0.25	-2	2	1	8	3	0.125	-3	32	5	4	2	BR
Cochabamba	3.2	NEG	NR	NEG	NEG	NR	NEG	NEG	NR	NEG	NEG	NR	NEG	NEG													NEG_ELISA
Cochabamba	88.034	POS	40	POS	NEG	160	POS	NEG	40	POS	NEG	10	NEG	NEG	0.25	-2	1	0	4	2	0.25	-2	16	4	4	2	BR
Cochabamba	282.47	POS	640	POS	POS	1280	POS	POS	160	POS	NEG	20	POS	NEG	0.5	-1	4	2	32	5	0.125	-3	64	6	8	3	BR
Cochabamba	127.46	POS	160	POS	NEG	640	POS	POS	20	POS	NEG	10	NEG	NEG	0.25	-2	8	3	16	4	0.03125	-5	64	6	2	1	BR
Cochabamba	93.435	POS	10	NEG	NEG	40	POS	NEG	10	NEG	NEG	10	NEG	NEG	0.25	-2	1	0	1	0	0.25	-2	4	2	1	0	BR
Cochabamba	4834.5	POS	5120	POS	POS	10240	POS	POS	1280	POS	POS	80	POS	NEG	0.5	-1	4	2	64	6	0.125	-3	128	7	16	4	BR
Cochabamba	65.755	POS	10	NEG	NEG	10	NEG	NEG	10	NEG	NEG	10	NEG	NEG	1	0	1	0	1	0	1	0	1	0	1	0	NEG
Cochabamba	517.68	POS	80	POS	NEG	160	POS	NEG	80	POS	NEG	10	NEG	NEG	0.5	-1	1	0	8	3	0.5	-1	16	4	8	3	BR
Cochabamba	788.36	POS	80	POS	NEG	160	POS	NEG	40	POS	NEG	10	NEG	NEG	0.5	-1	2	1	8	3	0.25	-2	16	4	4	2	BR
Cochabamba	2449	POS	2560	POS	POS	5120	POS	POS	2560	POS	POS	40	POS	NEG	0.5	-1	1	0	64	6	0.5	-1	128	7	64	6	BR
Cochabamba	161.9	POS	80	POS	NEG	160	POS	NEG	80	POS	NEG	10	NEG	NEG	0.5	-1	1	0	8	3	0.5	-1	16	4	8	3	BR
Cochabamba	1603.3	POS	640	POS	POS	320	POS	NEG	160	POS	NEG	10	NEG	NEG	2	1	4	2	64	6	0.5	-1	32	5	16	4	BP
Cochabamba	2943.8	POS	1280	POS	POS	1280	POS	POS	1280	POS	POS	20	POS	NEG	1	0	1	0	64	6	1	0	64	6	64	6	BP
Cochabamba	60.121	POS	20	POS	NEG	40	POS	NEG	10	NEG	NEG	10	NEG	NEG	0.5	-1	2	1	2	1	0.25	-2	4	2	1	0	BR
Cochabamba	3.795	NEG	NR	NEG	NEG	NR	NEG	NEG	NR	NEG	NEG	NR	NEG	NEG													NEG_ELISA
Cochabamba	235.62	POS	80	POS	NEG	320	POS	NEG	20	POS	NEG	10	NEG	NEG	0.25	-2	4	2	8	3	0.0625	-4	32	5	2	1	BR
Cochabamba	228.38	POS	640	POS	POS	160	POS	NEG	160	POS	NEG	10	NEG	NEG	4	2	4	2	64	6	1	0	16	4	16	4	BP
Cochabamba	791.27	POS	160	POS	NEG	640	POS	POS	320	POS	NEG	40	POS	NEG	0.25	-2	0.5	-1	4	2	0.5	-1	16	4	8	3	BR
Cochabamba	10.102	NEG	NR	NEG	NEG	NR	NEG	NEG	NR	NEG	NEG	NR	NEG	NEG													NEG_ELISA
Cochabamba	4464.8	POS	1280	POS	POS	10240	POS	POS	640	POS	POS	320	POS	NEG	0.125	-3	2	1	4	2	0.0625	-4	32	5	2	1	BR
Cochabamba	14.506	NEG	NR	NEG	NEG	NR	NEG	NEG	NR	NEG	NEG	NR	NEG	NEG													NEG_ELISA
Cochabamba	1965.7	POS	640	POS	POS	2560	POS	POS	640	POS	POS	20	POS	NEG	0.25	-2	1	0	32	5	0.25	-2	128	7	32	5	BR
Cochabamba	103.56	POS	40	POS	NEG	160	POS	NEG	10	NEG	NEG	10	NEG	NEG	0.25	-2	4	2	4	2	0.0625	-4	16	4	1	0	BR
Cochabamba	120.03	POS	40	POS	NEG	20	POS	NEG	10	NEG	NEG	10	NEG	NEG	2	1	4	2	4	2	0.5	-1	2	1	1	0	BP
Cochabamba	51.273	POS	10	NEG	NEG	80	POS	NEG	10	NEG	NEG	10	NEG	NEG	0.125	-3	1	0	1	0	0.125	-3	8	3	1	0	BR
Cochabamba	1567.3	POS	1280	POS	POS	640	POS	POS	640	POS	POS	80	POS	NEG	2	1	2	1	16	4	1	0	8	3	8	3	BP
Cochabamba	232	POS	160	POS	NEG	640	POS	POS	40	POS	NEG	10	NEG	NEG	0.25	-2	4	2	16	4	0.0625	-4	64	6	4	2	BR
Cochabamba	215.24	POS	160	POS	NEG	160	POS	NEG	40	POS	NEG	10	NEG	NEG	1	0	4	2	16	4	0.25	-2	16	4	4	2	BP
Cochabamba	139.81	POS	20	POS	NEG	20	POS	NEG	40	POS	NEG	10	NEG	NEG	1	0	0.5	-1	2	1	2	1	2	1	4	2	IN
Cochabamba	200.76	POS	20	POS	NEG	320	POS	NEG	20	POS	NEG	10	NEG	NEG	0.0625	-4	1	0	2	1	0.0625	-4	32	5	2	1	BR
Cochabamba	1658.8	POS	320	POS	NEG	640	POS	POS	160	POS	NEG	20	POS	NEG	0.5	-1	2	1	16	4	0.25	-2	32	5	8	3	BR
Cochabamba	1560.8	POS	320	POS	NEG	640	POS	POS	40	POS	NEG	10	NEG	NEG	0.5	-1	8	3	32	5	0.0625	-4	64	6	4	2	BR
Cochabamba	4.1521	NEG	NR	NEG	NEG	NR	NEG	NEG	NR	NEG	NEG	NR	NEG	NEG													NEG_ELISA
Cochabamba	3435.2	POS	2560	POS	POS	1280	POS	POS	1280	POS	POS	160	POS	NEG	2	1	2	1	16	4	1	0	8	3	8	3	BP
Cochabamba	1172.4	POS	640	POS	POS	5120	POS	POS	1280	POS	POS	40	POS	NEG	0.125	-3	0.5	-1	16	4	0.25	-2	128	7	32	5	BR
Cochabamba	1250.9	POS	320	POS	NEG	1280	POS	POS	320	POS	NEG	80	POS	NEG	0.25	-2	1	0	4	2	0.25	-2	16	4	4	2	BR
Cochabamba	130.67	POS	20	POS	NEG	320	POS	NEG	10	NEG	NEG	10	NEG	NEG	0.0625	-4	2	1	2	1	0.03125	-5	32	5	1	0	BR
Cochabamba	1701.2	POS	320	POS	NEG	640	POS	POS	80	POS	NEG	10	NEG	NEG	0.5	-1	4	2	32	5	0.125	-3	64	6	8	3	BR
Cochabamba	66.7	POS	10	NEG	NEG	40	POS	NEG	10	NEG	NEG	10	NEG	NEG	0.25	-2	1	0	1	0	0.25	-2	4	2	1	0	BR
Cochabamba	1753.5	POS	320	POS	NEG	1280	POS	POS	320	POS	NEG	80	POS	NEG	0.25	-2	1	0	4	2	0.25	-2	16	4	4	2	BR
Cochabamba	108.83	POS	40	POS	NEG	160	POS	NEG	40	POS	NEG	10	NEG	NEG	0.25	-2	1	0	4	2	0.25	-2	16	4	4	2	BR
Cochabamba	197.52	POS	320	POS	NEG	640	POS	POS	80	POS	NEG	10	NEG	NEG	0.5	-1	4	2	32	5	0.125	-3	64	6	8	3	BR
Cochabamba	326.98	POS	640	POS	POS	1280	POS	POS	80	POS	NEG	10	NEG	NEG	0.5	-1	8	3	64	6	0.0625	-4	128	7	8	3	BR
Cochabamba	1277.1	POS	320	POS	NEG	640	POS	POS	160	POS	NEG	20	POS	NEG	0.5	-1	2	1	16	4	0.25	-2	32	5	8	3	BR
Cochabamba	66.43	POS	10	NEG	NEG	10	NEG	NEG	10	NEG	NEG	10	NEG	NEG	1	0	1	0	1	0	1	0	1	0	1	0	NEG
Cochabamba	2564.7	POS	640	POS	POS	1280	POS	POS	640	POS	POS	20	POS	NEG	0.5	-1	1	0	32	5	0.5	-1	64	6	32	5	BR
Cochabamba	49.091	POS	10	NEG	NEG	40	POS	NEG	10	NEG	NEG	10	NEG	NEG	0.25	-2	1	0	1	0	0.25	-2	4	2	1	0	BR
Cochabamba	122.73	POS	80	POS	NEG	160	POS	NEG	160	POS	NEG	10	NEG	NEG	0.5	-1	0.5	-1	8	3	1	0	16	4	16	4	BR
Cochabamba	36	POS	10	NEG	NEG	40	POS	NEG	10	NEG	NEG	10	NEG	NEG	0.25	-2	1	0	1	0	0.25	-2	4	2	1	0	BR
Cochabamba	960	POS	320	POS	NEG	640	POS	POS	160	POS	NEG	20	POS	NEG	0.5	-1	2	1	16	4	0.25	-2	32	5	8	3	BR
Cochabamba	951.27	POS	640	POS	POS	320	POS	NEG	320	POS	NEG	10	NEG	NEG	2	1	2	1	64	6	1	0	32	5	32	5	BP
Cochabamba	302.2	POS	80	POS	NEG	320	POS	NEG	160	POS	NEG	10	NEG	NEG	0.25	-2	0.5	-1	8	3	0.5	-1	32	5	16	4	BR
Cochabamba	38.424	POS	10	NEG	NEG	10	NEG	NEG	10	NEG	NEG	10	NEG	NEG	1	0	1	0	1	0	1	0	1	0	1	0	NEG
Cochabamba	6696.5	POS	2560	POS	POS	10240	POS	POS	1280	POS	POS	320	POS	NEG	0.25	-2	2	1	8	3	0.125	-3	32	5	4	2	BR
Cochabamba	1120	POS	320	POS	NEG	640	POS	POS	80	POS	NEG	10	NEG	NEG	0.5	-1	4	2	32	5	0.125	-3	64	6	8	3	BR
Cochabamba	113.01	POS	20	POS	NEG	160	POS	NEG	20	POS	NEG	10	NEG	NEG	0.125	-3	1	0	2	1	0.125	-3	16	4	2	1	BR
Cochabamba	326.98	POS	160	POS	NEG	320	POS	NEG	80	POS	NEG	10	NEG	NEG	0.5	-1	2	1	16	4	0.25	-2	32	5	8	3	BR
Cochabamba	896	POS	80	POS	NEG	160	POS	NEG	320	POS	NEG	20	POS	NEG	0.5	-1	0.25	-2	4	2	2	1	8	3	16	4	IN
Cochabamba	457.64	POS	80	POS	NEG	160	POS	NEG	160	POS	NEG	10	NEG	NEG	0.5	-1	0.5	-1	8	3	1	0	16	4	16	4	BR
Cochabamba	805.82	POS	640	POS	POS	1280	POS	POS	160	POS	NEG	40	POS	NEG	0.5	-1	4	2	16	4	0.125	-3	32	5	4	2	BR
Cochabamba	4310.3	POS	2560	POS	POS	40960	POS	POS	2560	POS	POS	160	POS	NEG	0.0625	-4	1	0	16	4	0.0625	-4	256	8	16	4	BR
Cochabamba	1531.4	POS	640	POS	POS	2560	POS	POS	320	POS	NEG	40	POS	NEG	0.25	-2	2	1	16	4	0.125	-3	64	6	8	3	BR
Cochabamba	73.305	POS	10	NEG	NEG	10	NEG	NEG	10	NEG	NEG	10	NEG	NEG	1	0	1	0	1	0	1	0	1	0	1	0	NEG
Cochabamba	2191	POS	320	POS	NEG	640	POS	POS	160	POS	NEG	20	POS	NEG	0.5	-1	2	1	16	4	0.25	-2	32	5	8	3	BR
Cochabamba	221.48	POS	10	NEG	NEG	80	POS	NEG	20	POS	NEG	10	NEG	NEG	0.125	-3	0.5	-1	1	0	0.25	-2	8	3	2	1	BR
Cochabamba	90.894	POS	10	NEG	NEG	10	NEG	NEG	10	NEG	NEG	10	NEG	NEG	1	0	1	0	1	0	1	0	1	0	1	0	NEG
Cochabamba	228.65	POS	320	POS	NEG	320	POS	NEG	80	POS	NEG	10	NEG	NEG	1	0	4	2	32	5	0.25	-2	32	5	8	3	BP
Cochabamba	67.972	POS	10	NEG	NEG	10	NEG	NEG	10	NEG	NEG	10	NEG	NEG	1	0	1	0	1	0	1	0	1	0	1	0	NEG
Cochabamba	314.49	POS	160	POS	NEG	80	POS	NEG	40	POS	NEG	10	NEG	NEG	2	1	4	2	16	4	0.5	-1	8	3	4	2	BP
Cochabamba	325.51	POS	80	POS	NEG	160	POS	NEG	40	POS	NEG	10	NEG	NEG	0.5	-1	2	1	8	3	0.25	-2	16	4	4	2	BR
Cochabamba	101.67	POS	10	NEG	NEG	10	NEG	NEG	10	NEG	NEG	10	NEG	NEG	1	0	1	0	1	0	1	0	1	0	1	0	NEG
Cochabamba	3.2	NEG	NR	NEG	NEG	NR	NEG	NEG	NR	NEG	NEG	NR	NEG	NEG													NEG_ELISA
Cochabamba	375.52	POS	640	POS	POS	2560	POS	POS	320	POS	NEG	40	POS	NEG	0.25	-2	2	1	16	4	0.125	-3	64	6	8	3	BR
Cochabamba	222.25	POS	10	NEG	NEG	10	NEG	NEG	10	NEG	NEG	10	NEG	NEG	1	0	1	0	1	0	1	0	1	0	1	0	NEG
Cochabamba	192.78	POS	10	NEG	NEG	10	NEG	NEG	10	NEG	NEG	10	NEG	NEG	1	0	1	0	1	0	1	0	1	0	1	0	NEG
Cochabamba	2240	POS	1280	POS	POS	640	POS	POS	160	POS	NEG	40	POS	NEG	2	1	8	3	32	5	0.25	-2	16	4	4	2	BP
Cochabamba	517.68	POS	640	POS	POS	160	POS	NEG	160	POS	NEG	20	POS	NEG	4	2	4	2	32	5	1	0	8	3	8	3	BP
Cochabamba	3.16	NEG	NR	NEG	NEG	NR	NEG	NEG	NR	NEG	NEG	NR	NEG	NEG													NEG_ELISA
Cochabamba	7.88	NEG	320	POS	NEG	640	POS	POS	NR	NEG	NEG	10	NEG	NEG	0.5	-1			32	5			64	6			NEG_ELISA
Cochabamba	225.75	POS	640	POS	POS	2560	POS	POS	80	POS	NEG	10	NEG	NEG	0.25	-2	8	3	64	6	0.03125	-5	256	8	8	3	BR
Cochabamba	301.21	POS	160	POS	NEG	640	POS	POS	80	POS	NEG	10	NEG	NEG	0.25	-2	2	1	16	4	0.125	-3	64	6	8	3	BR
Cochabamba	3.02	NEG	NR	NEG	NEG	NR	NEG	NEG	NR	NEG	NEG	NR	NEG	NEG													NEG_ELISA
Cochabamba	88.057	POS	20	POS	NEG	20	POS	NEG	10	NEG	NEG	10	NEG	NEG	1	0	2	1	2	1	0.5	-1	2	1	1	0	BP
Cochabamba	28.28	DOU	40	POS	NEG	20	POS	NEG	10	NEG	NEG	10	NEG	NEG	2	1	4	2	4	2	0.5	-1	2	1	1	0	BP
Cochabamba	116.77	POS	160	POS	NEG	320	POS	NEG	40	POS	NEG	10	NEG	NEG	0.5	-1	4	2	16	4	0.125	-3	32	5	4	2	BR
Cochabamba	936.73	POS	320	POS	NEG	640	POS	POS	320	POS	NEG	40	POS	NEG	0.5	-1	1	0	8	3	0.5	-1	16	4	8	3	BR
Cochabamba	3.01	NEG	NR	NEG	NEG	NR	NEG	NEG	NR	NEG	NEG	NR	NEG	NEG													NEG_ELISA
Cochabamba	67.631	POS	40	POS	NEG	40	POS	NEG	80	POS	NEG	10	NEG	NEG	1	0	0.5	-1	4	2	2	1	4	2	8	3	IN
Cochabamba	2606.8	POS	320	POS	NEG	640	POS	POS	160	POS	NEG	10	NEG	NEG	0.5	-1	2	1	32	5	0.25	-2	64	6	16	4	BR
Cochabamba	884.36	POS	1280	POS	POS	640	POS	POS	160	POS	NEG	20	POS	NEG	2	1	8	3	64	6	0.25	-2	32	5	8	3	BP
Cochabamba	4.04	NEG	NR	NEG	NEG	NR	NEG	NEG	NR	NEG	NEG	NR	NEG	NEG													NEG_ELISA
Cochabamba	71.943	POS	10	NEG	NEG	10	NEG	NEG	10	NEG	NEG	10	NEG	NEG	1	0	1	0	1	0	1	0	1	0	1	0	NEG
Cochabamba	2040.8	POS	640	POS	POS	1280	POS	POS	160	POS	NEG	20	POS	NEG	0.5	-1	4	2	32	5	0.125	-3	64	6	8	3	BR
Cochabamba	36.136	POS	10	NEG	NEG	10	NEG	NEG	10	NEG	NEG	10	NEG	NEG	1	0	1	0	1	0	1	0	1	0	1	0	NEG
Cochabamba	39.401	POS	10	NEG	NEG	10	NEG	NEG	10	NEG	NEG	10	NEG	NEG	1	0	1	0	1	0	1	0	1	0	1	0	NEG
Cochabamba	234.67	POS	160	POS	NEG	320	POS	NEG	40	POS	NEG	10	NEG	NEG	0.5	-1	4	2	16	4	0.125	-3	32	5	4	2	BR
Cochabamba	3.13	NEG	NR	NEG	NEG	NR	NEG	NEG	NR	NEG	NEG	NR	NEG	NEG													NEG_ELISA
Cochabamba	2756.6	POS	640	POS	POS	5120	POS	POS	1280	POS	POS	40	POS	NEG	0.125	-3	0.5	-1	16	4	0.25	-2	128	7	32	5	BR
Cochabamba	1822	POS	640	POS	POS	5120	POS	POS	640	POS	POS	20	POS	NEG	0.125	-3	1	0	32	5	0.125	-3	256	8	32	5	BR
Cochabamba	2553.5	POS	1280	POS	POS	640	POS	POS	1280	POS	POS	20	POS	NEG	2	1	1	0	64	6	2	1	32	5	64	6	BP
Cochabamba	6.08	NEG	NR	NEG	NEG	NR	NEG	NEG	NR	NEG	NEG	NR	NEG	NEG													NEG_ELISA
Cochabamba	346.42	POS	80	POS	NEG	160	POS	NEG	40	POS	NEG	10	NEG	NEG	0.5	-1	2	1	8	3	0.25	-2	16	4	4	2	BR
Cochabamba	86.809	POS	40	POS	NEG	160	POS	NEG	40	POS	NEG	10	NEG	NEG	0.25	-2	1	0	4	2	0.25	-2	16	4	4	2	BR
Cochabamba	158.06	POS	40	POS	NEG	160	POS	NEG	80	POS	NEG	10	NEG	NEG	0.25	-2	0.5	-1	4	2	0.5	-1	16	4	8	3	BR
Cochabamba	308.56	POS	160	POS	NEG	80	POS	NEG	80	POS	NEG	10	NEG	NEG	2	1	2	1	16	4	1	0	8	3	8	3	BP
Cochabamba	86.014	POS	160	POS	NEG	320	POS	NEG	80	POS	NEG	10	NEG	NEG	0.5	-1	2	1	16	4	0.25	-2	32	5	8	3	BR
Cochabamba	680.73	POS	40	POS	NEG	160	POS	NEG	40	POS	NEG	10	NEG	NEG	0.25	-2	1	0	4	2	0.25	-2	16	4	4	2	BR
Cochabamba	2161.6	POS	160	POS	NEG	1280	POS	POS	1280	POS	POS	40	POS	NEG	0.125	-3	0.125	-3	4	2	1	0	32	5	32	5	BR
Cochabamba	48.109	POS	10	NEG	NEG	10	NEG	NEG	10	NEG	NEG	10	NEG	NEG	1	0	1	0	1	0	1	0	1	0	1	0	NEG
Cochabamba	116.43	POS	80	POS	NEG	160	POS	NEG	10	NEG	NEG	10	NEG	NEG	0.5	-1	8	3	8	3	0.0625	-4	16	4	1	0	BR
Cochabamba	17.12	NEG	NR	NEG	NEG	NR	NEG	NEG	NR	NEG	NEG	NR	NEG	NEG													NEG_ELISA
Cochabamba	259.11	POS	10	NEG	NEG	80	POS	NEG	10	NEG	NEG	10	NEG	NEG	0.125	-3	1	0	1	0	0.125	-3	8	3	1	0	BR
Cochabamba	1567.3	POS	160	POS	NEG	640	POS	POS	80	POS	NEG	10	NEG	NEG	0.25	-2	2	1	16	4	0.125	-3	64	6	8	3	BR
Cochabamba	4521	POS	1280	POS	POS	2560	POS	POS	640	POS	POS	80	POS	NEG	0.5	-1	2	1	16	4	0.25	-2	32	5	8	3	BR
Cochabamba	67.064	POS	20	POS	NEG	10	NEG	NEG	10	NEG	NEG	10	NEG	NEG	2	1	2	1	2	1	1	0	1	0	1	0	BP
Cochabamba	762.18	POS	160	POS	NEG	640	POS	POS	160	POS	NEG	10	NEG	NEG	0.25	-2	1	0	16	4	0.25	-2	64	6	16	4	BR
Cochabamba	68.426	POS	40	POS	NEG	80	POS	NEG	40	POS	NEG	10	NEG	NEG	0.5	-1	1	0	4	2	0.5	-1	8	3	4	2	BR
Cochabamba	1746.9	POS	2560	POS	POS	2560	POS	POS	640	POS	POS	40	POS	NEG	1	0	4	2	64	6	0.25	-2	64	6	16	4	BP
Cochabamba	150.5	POS	10	NEG	NEG	40	POS	NEG	10	NEG	NEG	10	NEG	NEG	0.25	-2	1	0	1	0	0.25	-2	4	2	1	0	BR
Cochabamba	38.095	POS	20	POS	NEG	80	POS	NEG	20	POS	NEG	10	NEG	NEG	0.25	-2	1	0	2	1	0.25	-2	8	3	2	1	BR
Cochabamba	218.38	POS	160	POS	NEG	2560	POS	POS	40	POS	NEG	10	NEG	NEG	0.0625	-4	4	2	16	4	0.015625	-6	256	8	4	2	BR
Cochabamba	97.021	POS	40	POS	NEG	160	POS	NEG	10	NEG	NEG	10	NEG	NEG	0.25	-2	4	2	4	2	0.0625	-4	16	4	1	0	BR
Cochabamba	1753.5	POS	320	POS	NEG	640	POS	POS	160	POS	NEG	40	POS	NEG	0.5	-1	2	1	8	3	0.25	-2	16	4	4	2	BR
Cochabamba	293.3	POS	40	POS	NEG	2560	POS	POS	20	POS	NEG	10	NEG	NEG	0.015625	-6	2	1	4	2	0.0078125	-7	256	8	2	1	BR
Cochabamba	1616.3	POS	2560	POS	POS	10240	POS	POS	2560	POS	POS	40	POS	NEG	0.25	-2	1	0	64	6	0.25	-2	256	8	64	6	BR
Cochabamba	66.383	POS	20	POS	NEG	10	NEG	NEG	20	POS	NEG	10	NEG	NEG	2	1	1	0	2	1	2	1	1	0	2	1	BP
Cochabamba	936.73	POS	80	POS	NEG	640	POS	POS	40	POS	NEG	10	NEG	NEG	0.125	-3	2	1	8	3	0.0625	-4	64	6	4	2	BR
Cochabamba	234.28	POS	160	POS	NEG	640	POS	POS	20	POS	NEG	10	NEG	NEG	0.25	-2	8	3	16	4	0.03125	-5	64	6	2	1	BR
Cochabamba	379.48	POS	640	POS	POS	320	POS	NEG	80	POS	NEG	10	NEG	NEG	2	1	8	3	64	6	0.25	-2	32	5	8	3	BP
Cochabamba	3224.6	POS	2560	POS	POS	20480	POS	POS	640	POS	POS	80	POS	NEG	0.125	-3	4	2	32	5	0.03125	-5	256	8	8	3	BR
Cochabamba	9719.6	POS	5120	POS	POS	20480	POS	POS	1280	POS	POS	160	POS	NEG	0.25	-2	4	2	32	5	0.0625	-4	128	7	8	3	BR
Cochabamba	3826.8	POS	2560	POS	POS	20480	POS	POS	320	POS	NEG	80	POS	NEG	0.125	-3	8	3	32	5	0.015625	-6	256	8	4	2	BR
Cochabamba	2395.6	POS	640	POS	POS	5120	POS	POS	1280	POS	POS	80	POS	NEG	0.125	-3	0.5	-1	8	3	0.25	-2	64	6	16	4	BR
Cochabamba	60.517	POS	20	POS	NEG	10	NEG	NEG	20	POS	NEG	10	NEG	NEG	2	1	1	0	2	1	2	1	1	0	2	1	BP
Cochabamba	26.72	DOU	10	NEG	NEG	10	NEG	NEG	10	NEG	NEG	10	NEG	NEG	1	0	1	0	1	0	1	0	1	0	1	0	NEG
Cochabamba	14.6	NEG	NR	NEG	NEG	NR	NEG	NEG	NR	NEG	NEG	NR	NEG	NEG													NEG_ELISA
Cochabamba	58.776	POS	20	POS	NEG	80	POS	NEG	20	POS	NEG	10	NEG	NEG	0.25	-2	1	0	2	1	0.25	-2	8	3	2	1	BR
Cochabamba	84.766	POS	10	NEG	NEG	10	NEG	NEG	10	NEG	NEG	10	NEG	NEG	1	0	1	0	1	0	1	0	1	0	1	0	NEG
Cochabamba	3.92	NEG	NR	NEG	NEG	NR	NEG	NEG	NR	NEG	NEG	NR	NEG	NEG													NEG_ELISA
Cochabamba	1734.6	POS	640	POS	POS	1280	POS	POS	640	POS	POS	80	POS	NEG	0.5	-1	1	0	8	3	0.5	-1	16	4	8	3	BR
Cochabamba	117.67	POS	80	POS	NEG	160	POS	NEG	40	POS	NEG	10	NEG	NEG	0.5	-1	2	1	8	3	0.25	-2	16	4	4	2	BR
Cochabamba	1885	POS	320	POS	NEG	1280	POS	POS	320	POS	NEG	20	POS	NEG	0.25	-2	1	0	16	4	0.25	-2	64	6	16	4	BR
Cochabamba	208.48	POS	80	POS	NEG	160	POS	NEG	40	POS	NEG	10	NEG	NEG	0.5	-1	2	1	8	3	0.25	-2	16	4	4	2	BR
Cochabamba	295.84	POS	80	POS	NEG	320	POS	NEG	40	POS	NEG	10	NEG	NEG	0.25	-2	2	1	8	3	0.125	-3	32	5	4	2	BR
Cochabamba	1146.2	POS	640	POS	POS	1280	POS	POS	320	POS	NEG	20	POS	NEG	0.5	-1	2	1	32	5	0.25	-2	64	6	16	4	BR
Cochabamba	733.09	POS	40	POS	NEG	160	POS	NEG	20	POS	NEG	10	NEG	NEG	0.25	-2	2	1	4	2	0.125	-3	16	4	2	1	BR
Cochabamba	686.55	POS	320	POS	NEG	640	POS	POS	1280	POS	POS	40	POS	NEG	0.5	-1	0.25	-2	8	3	2	1	16	4	32	5	IN
Cochabamba	21.68	NEG	10	NEG	NEG	10	NEG	NEG	10	NEG	NEG	10	NEG	NEG	1	0	1	0	1	0	1	0	1	0	1	0	NEG_ELISA
Cochabamba	57.186	POS	20	POS	NEG	40	POS	NEG	10	NEG	NEG	10	NEG	NEG	0.5	-1	2	1	2	1	0.25	-2	4	2	1	0	BR
Cochabamba	1507.3	POS	1280	POS	POS	2560	POS	POS	1280	POS	POS	20	POS	NEG	0.5	-1	1	0	64	6	0.5	-1	128	7	64	6	BR
Cochabamba	73.002	POS	80	POS	NEG	40	POS	NEG	10	NEG	NEG	10	NEG	NEG	2	1	8	3	8	3	0.25	-2	4	2	1	0	BP
Cochabamba	472.34	POS	320	POS	NEG	320	POS	NEG	40	POS	NEG	10	NEG	NEG	1	0	8	3	32	5	0.125	-3	32	5	4	2	BP
Cochabamba	169.65	POS	160	POS	NEG	80	POS	NEG	80	POS	NEG	10	NEG	NEG	2	1	2	1	16	4	1	0	8	3	8	3	BP
Cochabamba	91.851	POS	20	POS	NEG	80	POS	NEG	20	POS	NEG	10	NEG	NEG	0.25	-2	1	0	2	1	0.25	-2	8	3	2	1	BR
Cochabamba	360.05	POS	160	POS	NEG	640	POS	POS	160	POS	NEG	10	NEG	NEG	0.25	-2	1	0	16	4	0.25	-2	64	6	16	4	BR
Cochabamba	962.91	POS	320	POS	NEG	640	POS	POS	80	POS	NEG	10	NEG	NEG	0.5	-1	4	2	32	5	0.125	-3	64	6	8	3	BR
Cochabamba	358.95	POS	160	POS	NEG	640	POS	POS	160	POS	NEG	10	NEG	NEG	0.25	-2	1	0	16	4	0.25	-2	64	6	16	4	BR
Cochabamba	355.37	POS	320	POS	NEG	640	POS	POS	80	POS	NEG	20	POS	NEG	0.5	-1	4	2	16	4	0.125	-3	32	5	4	2	BR
Cochabamba	44.776	POS	10	NEG	NEG	10	NEG	NEG	10	NEG	NEG	10	NEG	NEG	1	0	1	0	1	0	1	0	1	0	1	0	NEG
Cochabamba	83.833	POS	20	POS	NEG	10	NEG	NEG	10	NEG	NEG	10	NEG	NEG	2	1	2	1	2	1	1	0	1	0	1	0	BP
Cochabamba	4594.4	POS	2560	POS	POS	5120	POS	POS	1280	POS	POS	160	POS	NEG	0.5	-1	2	1	16	4	0.25	-2	32	5	8	3	BR
Cochabamba	1363.9	POS	320	POS	NEG	1280	POS	POS	160	POS	NEG	40	POS	NEG	0.25	-2	2	1	8	3	0.125	-3	32	5	4	2	BR
Cochabamba	1818.6	POS	1280	POS	POS	2560	POS	POS	640	POS	POS	80	POS	NEG	0.5	-1	2	1	16	4	0.25	-2	32	5	8	3	BR
Cochabamba	4715.4	POS	1280	POS	POS	5120	POS	POS	2560	POS	POS	160	POS	NEG	0.25	-2	0.5	-1	8	3	0.5	-1	32	5	16	4	BR
Cochabamba	154.41	POS	160	POS	NEG	80	POS	NEG	20	POS	NEG	10	NEG	NEG	2	1	8	3	16	4	0.25	-2	8	3	2	1	BP
Cochabamba	3.19	NEG	NR	NEG	NEG	NR	NEG	NEG	NR	NEG	NEG	NR	NEG	NEG													NEG_ELISA
Cochabamba	92.554	POS	10	NEG	NEG	40	POS	NEG	10	NEG	NEG	10	NEG	NEG	0.25	-2	1	0	1	0	0.25	-2	4	2	1	0	BR
Cochabamba	2364.2	POS	1280	POS	POS	5120	POS	POS	1280	POS	POS	40	POS	NEG	0.25	-2	1	0	32	5	0.25	-2	128	7	32	5	BR
Cochabamba	184.21	POS	40	POS	NEG	160	POS	NEG	10	NEG	NEG	10	NEG	NEG	0.25	-2	4	2	4	2	0.0625	-4	16	4	1	0	BR
Cochabamba	20.655	NEG	NR	NEG	NEG	NR	NEG	NEG	NR	NEG	NEG	NR	NEG	NEG													NEG_ELISA
Cochabamba	148.66	POS	40	POS	NEG	160	POS	NEG	40	POS	NEG	10	NEG	NEG	0.25	-2	1	0	4	2	0.25	-2	16	4	4	2	BR
Cochabamba	3	NEG	NR	NEG	NEG	NR	NEG	NEG	NR	NEG	NEG	NR	NEG	NEG													NEG_ELISA
Cochabamba	3.16	NEG	NR	NEG	NEG	NR	NEG	NEG	NR	NEG	NEG	NR	NEG	NEG													NEG_ELISA
Cochabamba	239.92	POS	160	POS	NEG	640	POS	POS	80	POS	NEG	20	POS	NEG	0.25	-2	2	1	8	3	0.125	-3	32	5	4	2	BR
Cochabamba	281.32	POS	160	POS	NEG	80	POS	NEG	320	POS	NEG	10	NEG	NEG	2	1	0.5	-1	16	4	4	2	8	3	32	5	IN
Cochabamba	11110	POS	10240	POS	POS	10240	POS	POS	20480	POS	POS	320	POS	NEG	1	0	0.5	-1	32	5	2	1	32	5	64	6	IN
Cochabamba	14.764	NEG	NR	NEG	NEG	NR	NEG	NEG	NR	NEG	NEG	NR	NEG	NEG													NEG_ELISA
Cochabamba	94.945	POS	80	POS	NEG	40	POS	NEG	20	POS	NEG	10	NEG	NEG	2	1	4	2	8	3	0.5	-1	4	2	2	1	BP
Cochabamba	3471.3	POS	160	POS	NEG	320	POS	NEG	40	POS	NEG	10	NEG	NEG	0.5	-1	4	2	16	4	0.125	-3	32	5	4	2	BR
Cochabamba	2049.4	POS	1280	POS	POS	640	POS	POS	640	POS	POS	40	POS	NEG	2	1	2	1	32	5	1	0	16	4	16	4	BP
Cochabamba	85.521	POS	80	POS	NEG	40	POS	NEG	20	POS	NEG	10	NEG	NEG	2	1	4	2	8	3	0.5	-1	4	2	2	1	BP
Cochabamba	20.982	NEG	NR	NEG	NEG	NR	NEG	NEG	NR	NEG	NEG	NR	NEG	NEG													NEG_ELISA
Cochabamba	948.36	POS	80	POS	NEG	160	POS	NEG	40	POS	NEG	10	NEG	NEG	0.5	-1	2	1	8	3	0.25	-2	16	4	4	2	BR
Cochabamba	124.62	POS	40	POS	NEG	160	POS	NEG	80	POS	NEG	10	NEG	NEG	0.25	-2	0.5	-1	4	2	0.5	-1	16	4	8	3	BR
Cochabamba	2854.9	POS	1280	POS	POS	1280	POS	POS	1280	POS	POS	40	POS	NEG	1	0	1	0	32	5	1	0	32	5	32	5	BP
Cochabamba	7663.2	POS	2560	POS	POS	5120	POS	POS	2560	POS	POS	160	POS	NEG	0.5	-1	1	0	16	4	0.5	-1	32	5	16	4	BR
Cochabamba	7537.3	POS	2560	POS	POS	10240	POS	POS	2560	POS	POS	80	POS	NEG	0.25	-2	1	0	32	5	0.25	-2	128	7	32	5	BR
Cochabamba	26.436	DOU	10	NEG	NEG	20	POS	NEG	10	NEG	NEG	10	NEG	NEG	0.5	-1	1	0	1	0	0.5	-1	2	1	1	0	BR
Cochabamba	916.36	POS	160	POS	NEG	80	POS	NEG	80	POS	NEG	10	NEG	NEG	2	1	2	1	16	4	1	0	8	3	8	3	BP
Cochabamba	325.64	POS	640	POS	POS	1280	POS	POS	160	POS	NEG	10	NEG	NEG	0.5	-1	4	2	64	6	0.125	-3	128	7	16	4	BR
Cochabamba	96.914	POS	20	POS	NEG	40	POS	NEG	10	NEG	NEG	10	NEG	NEG	0.5	-1	2	1	2	1	0.25	-2	4	2	1	0	BR
Cochabamba	77.363	POS	40	POS	NEG	20	POS	NEG	10	NEG	NEG	10	NEG	NEG	2	1	4	2	4	2	0.5	-1	2	1	1	0	BP
Cochabamba	373.26	POS	160	POS	NEG	640	POS	POS	320	POS	NEG	10	NEG	NEG	0.25	-2	0.5	-1	16	4	0.5	-1	64	6	32	5	BR
Cochabamba	20.982	NEG	NR	NEG	NEG	NR	NEG	NEG	NR	NEG	NEG	NR	NEG	NEG													NEG_ELISA
Cochabamba	3308.7	POS	1280	POS	POS	10240	POS	POS	2560	POS	POS	40	POS	NEG	0.125	-3	0.5	-1	32	5	0.25	-2	256	8	64	6	BR
Cochabamba	1934	POS	320	POS	NEG	640	POS	POS	640	POS	POS	40	POS	NEG	0.5	-1	0.5	-1	8	3	1	0	16	4	16	4	BR
Cochabamba	82.286	POS	10	NEG	NEG	10	NEG	NEG	10	NEG	NEG	10	NEG	NEG	1	0	1	0	1	0	1	0	1	0	1	0	NEG
Cochabamba	67.376	POS	10	NEG	NEG	10	NEG	NEG	10	NEG	NEG	10	NEG	NEG	1	0	1	0	1	0	1	0	1	0	1	0	NEG
Cochabamba	45.506	POS	10	NEG	NEG	10	NEG	NEG	10	NEG	NEG	10	NEG	NEG	1	0	1	0	1	0	1	0	1	0	1	0	NEG
Cochabamba	1163.6	POS	640	POS	POS	80	POS	NEG	160	POS	NEG	80	POS	NEG	8	3	4	2	8	3	2	1	1	0	2	1	BP
Cochabamba	69.626	POS	20	POS	NEG	10	NEG	NEG	20	POS	NEG	10	NEG	NEG	2	1	1	0	2	1	2	1	1	0	2	1	BP
Cochabamba	3.09	NEG	NR	NEG	NEG	NR	NEG	NEG	NR	NEG	NEG	NR	NEG	NEG													NEG_ELISA
Cochabamba	1192.7	POS	80	POS	NEG	160	POS	NEG	40	POS	NEG	10	NEG	NEG	0.5	-1	2	1	8	3	0.25	-2	16	4	4	2	BR
Cochabamba	358.95	POS	80	POS	NEG	1280	POS	POS	80	POS	NEG	10	NEG	NEG	0.0625	-4	1	0	8	3	0.0625	-4	128	7	8	3	BR
Cochabamba	334.45	POS	320	POS	NEG	640	POS	POS	40	POS	NEG	10	NEG	NEG	0.5	-1	8	3	32	5	0.0625	-4	64	6	4	2	BR
Cochabamba	3433.5	POS	1280	POS	POS	10240	POS	POS	2560	POS	POS	320	POS	NEG	0.125	-3	0.5	-1	4	2	0.25	-2	32	5	8	3	BR
Cochabamba	1227.6	POS	320	POS	NEG	320	POS	NEG	160	POS	NEG	20	POS	NEG	1	0	2	1	16	4	0.5	-1	16	4	8	3	BP
Cochabamba	12800	POS	2560	POS	POS	5120	POS	POS	1280	POS	POS	160	POS	NEG	0.5	-1	2	1	16	4	0.25	-2	32	5	8	3	BR
Cochabamba	4677.6	POS	1280	POS	POS	5120	POS	POS	2560	POS	POS	80	POS	NEG	0.25	-2	0.5	-1	16	4	0.5	-1	64	6	32	5	BR
Cochabamba	128.9	POS	160	POS	NEG	640	POS	POS	80	POS	NEG	10	NEG	NEG	0.25	-2	2	1	16	4	0.125	-3	64	6	8	3	BR
Cochabamba	75.253	POS	40	POS	NEG	80	POS	NEG	40	POS	NEG	10	NEG	NEG	0.5	-1	1	0	4	2	0.5	-1	8	3	4	2	BR
Cochabamba	182.01	POS	40	POS	NEG	20	POS	NEG	20	POS	NEG	10	NEG	NEG	2	1	2	1	4	2	1	0	2	1	2	1	BP
Cochabamba	2907.9	POS	2560	POS	POS	2560	POS	POS	2560	POS	POS	80	POS	NEG	1	0	1	0	32	5	1	0	32	5	32	5	BP
Cochabamba	2949.5	POS	2560	POS	POS	5120	POS	POS	2560	POS	POS	160	POS	NEG	0.5	-1	1	0	16	4	0.5	-1	32	5	16	4	BR
Cochabamba	63.513	POS	10	NEG	NEG	10	NEG	NEG	10	NEG	NEG	10	NEG	NEG	1	0	1	0	1	0	1	0	1	0	1	0	NEG
Cochabamba	4518.8	POS	2560	POS	POS	1280	POS	POS	1280	POS	POS	160	POS	NEG	2	1	2	1	16	4	1	0	8	3	8	3	BP
Cochabamba	135.11	POS	10	NEG	NEG	20	POS	NEG	20	POS	NEG	10	NEG	NEG	0.5	-1	0.5	-1	1	0	1	0	2	1	2	1	BR
Cochabamba	24.255	NEG	40	POS	NEG	10	NEG	NEG	10	NEG	NEG	10	NEG	NEG	4	2	4	2	4	2	1	0	1	0	1	0	NEG_ELISA
Cochabamba	170.5	POS	80	POS	NEG	160	POS	NEG	40	POS	NEG	10	NEG	NEG	0.5	-1	2	1	8	3	0.25	-2	16	4	4	2	BR
Cochabamba	4136.8	POS	640	POS	POS	2560	POS	POS	2560	POS	POS	40	POS	NEG	0.25	-2	0.25	-2	16	4	1	0	64	6	64	6	BR
Cochabamba	51.103	POS	40	POS	NEG	20	POS	NEG	40	POS	NEG	10	NEG	NEG	2	1	1	0	4	2	2	1	2	1	4	2	BP
Cochabamba	6.1455	NEG	NR	NEG	NEG	NR	NEG	NEG	NR	NEG	NEG	NR	NEG	NEG													NEG_ELISA
Cochabamba	115.34	POS	20	POS	NEG	20	POS	NEG	40	POS	NEG	10	NEG	NEG	1	0	0.5	-1	2	1	2	1	2	1	4	2	IN
Cochabamba	88.193	POS	20	POS	NEG	80	POS	NEG	10	NEG	NEG	10	NEG	NEG	0.25	-2	2	1	2	1	0.125	-3	8	3	1	0	BR
Cochabamba	109.85	POS	160	POS	NEG	640	POS	POS	80	POS	NEG	10	NEG	NEG	0.25	-2	2	1	16	4	0.125	-3	64	6	8	3	BR
Cochabamba	683.64	POS	160	POS	NEG	640	POS	POS	160	POS	NEG	10	NEG	NEG	0.25	-2	1	0	16	4	0.25	-2	64	6	16	4	BR
Cochabamba	134.43	POS	40	POS	NEG	80	POS	NEG	40	POS	NEG	10	NEG	NEG	0.5	-1	1	0	4	2	0.5	-1	8	3	4	2	BR
Cochabamba	1064.7	POS	320	POS	NEG	640	POS	POS	640	POS	POS	40	POS	NEG	0.5	-1	0.5	-1	8	3	1	0	16	4	16	4	BR
Cochabamba	4.5091	NEG	NR	NEG	NEG	NR	NEG	NEG	NR	NEG	NEG	NR	NEG	NEG													NEG_ELISA
Cochabamba	48.061	POS	20	POS	NEG	10	NEG	NEG	10	NEG	NEG	10	NEG	NEG	2	1	2	1	2	1	1	0	1	0	1	0	BP
Cochabamba	1224.7	POS	320	POS	NEG	640	POS	POS	160	POS	NEG	40	POS	NEG	0.5	-1	2	1	8	3	0.25	-2	16	4	4	2	BR
Cochabamba	2539	POS	320	POS	NEG	80	POS	NEG	80	POS	NEG	20	POS	NEG	4	2	4	2	16	4	1	0	4	2	4	2	BP
Cochabamba	872.73	POS	160	POS	NEG	640	POS	POS	320	POS	NEG	10	NEG	NEG	0.25	-2	0.5	-1	16	4	0.5	-1	64	6	32	5	BR
Cochabamba	160	POS	20	POS	NEG	10	NEG	NEG	10	NEG	NEG	10	NEG	NEG	2	1	2	1	2	1	1	0	1	0	1	0	BP
Cochabamba	110.7	POS	80	POS	NEG	160	POS	NEG	20	POS	NEG	10	NEG	NEG	0.5	-1	4	2	8	3	0.125	-3	16	4	2	1	BR
Cochabamba	8478.5	POS	5120	POS	POS	10240	POS	POS	1280	POS	POS	160	POS	NEG	0.5	-1	4	2	32	5	0.125	-3	64	6	8	3	BR
Cochabamba	1678.7	POS	1280	POS	POS	1280	POS	POS	320	POS	NEG	80	POS	NEG	1	0	4	2	16	4	0.25	-2	16	4	4	2	BP
Cochabamba	170.02	POS	80	POS	NEG	160	POS	NEG	40	POS	NEG	10	NEG	NEG	0.5	-1	2	1	8	3	0.25	-2	16	4	4	2	BR
Cochabamba	2010.9	POS	320	POS	NEG	1280	POS	POS	160	POS	NEG	40	POS	NEG	0.25	-2	2	1	8	3	0.125	-3	32	5	4	2	BR
Cochabamba	133.3	POS	10	NEG	NEG	10	NEG	NEG	10	NEG	NEG	10	NEG	NEG	1	0	1	0	1	0	1	0	1	0	1	0	NEG
Cochabamba	168.43	POS	160	POS	NEG	80	POS	NEG	40	POS	NEG	10	NEG	NEG	2	1	4	2	16	4	0.5	-1	8	3	4	2	BP
Cochabamba	9.7071	NEG	NR	NEG	NEG	NR	NEG	NEG	NR	NEG	NEG	NR	NEG	NEG													NEG_ELISA
Cochabamba	1570.3	POS	320	POS	NEG	160	POS	NEG	160	POS	NEG	20	POS	NEG	2	1	2	1	16	4	1	0	8	3	8	3	BP
Cochabamba	312.49	POS	160	POS	NEG	320	POS	NEG	40	POS	NEG	10	NEG	NEG	0.5	-1	4	2	16	4	0.125	-3	32	5	4	2	BR
Cochabamba	139.48	POS	10	NEG	NEG	40	POS	NEG	20	POS	NEG	10	NEG	NEG	0.25	-2	0.5	-1	1	0	0.5	-1	4	2	2	1	BR
Cochabamba	98.046	POS	80	POS	NEG	160	POS	NEG	10	NEG	NEG	10	NEG	NEG	0.5	-1	8	3	8	3	0.0625	-4	16	4	1	0	BR
Cochabamba	58.645	POS	10	NEG	NEG	10	NEG	NEG	10	NEG	NEG	10	NEG	NEG	1	0	1	0	1	0	1	0	1	0	1	0	NEG
Cochabamba	17.901	NEG	NR	NEG	NEG	NR	NEG	NEG	NR	NEG	NEG	NR	NEG	NEG													NEG_ELISA
Cochabamba	67.215	POS	10	NEG	NEG	10	NEG	NEG	10	NEG	NEG	10	NEG	NEG	1	0	1	0	1	0	1	0	1	0	1	0	NEG
Cochabamba	1157.8	POS	640	POS	POS	320	POS	NEG	160	POS	NEG	10	NEG	NEG	2	1	4	2	64	6	0.5	-1	32	5	16	4	BP
Cochabamba	3709.5	POS	1280	POS	POS	2560	POS	POS	2560	POS	POS	80	POS	NEG	0.5	-1	0.5	-1	16	4	1	0	32	5	32	5	BR
Cochabamba	221.57	POS	40	POS	NEG	160	POS	NEG	80	POS	NEG	10	NEG	NEG	0.25	-2	0.5	-1	4	2	0.5	-1	16	4	8	3	BR
Cochabamba	198.62	POS	160	POS	NEG	640	POS	POS	80	POS	NEG	10	NEG	NEG	0.25	-2	2	1	16	4	0.125	-3	64	6	8	3	BR
Cochabamba	39.267	POS	10	NEG	NEG	10	NEG	NEG	10	NEG	NEG	10	NEG	NEG	1	0	1	0	1	0	1	0	1	0	1	0	NEG
Cochabamba	144.95	POS	20	POS	NEG	20	POS	NEG	10	NEG	NEG	10	NEG	NEG	1	0	2	1	2	1	0.5	-1	2	1	1	0	BP
Cochabamba	974.55	POS	320	POS	NEG	640	POS	POS	320	POS	NEG	10	NEG	NEG	0.5	-1	1	0	32	5	0.5	-1	64	6	32	5	BR
Cochabamba	3.09	NEG	NR	NEG	NEG	NR	NEG	NEG	NR	NEG	NEG	NR	NEG	NEG													NEG_ELISA
Cochabamba	768	POS	160	POS	NEG	640	POS	POS	40	POS	NEG	10	NEG	NEG	0.25	-2	4	2	16	4	0.0625	-4	64	6	4	2	BR
Cochabamba	22.36	NEG	10	NEG	NEG	10	NEG	NEG	10	NEG	NEG	10	NEG	NEG	1	0	1	0	1	0	1	0	1	0	1	0	NEG_ELISA
Cochabamba	1580.8	POS	640	POS	POS	320	POS	NEG	320	POS	NEG	10	NEG	NEG	2	1	2	1	64	6	1	0	32	5	32	5	BP
Cochabamba	110.47	POS	40	POS	NEG	40	POS	NEG	10	NEG	NEG	10	NEG	NEG	1	0	4	2	4	2	0.25	-2	4	2	1	0	BP
Cochabamba	30.313	DOU	10	NEG	NEG	10	NEG	NEG	10	NEG	NEG	10	NEG	NEG	1	0	1	0	1	0	1	0	1	0	1	0	NEG
Cochabamba	191.91	POS	640	POS	POS	320	POS	NEG	160	POS	NEG	10	NEG	NEG	2	1	4	2	64	6	0.5	-1	32	5	16	4	BP
Cochabamba	114.41	POS	320	POS	NEG	320	POS	NEG	80	POS	NEG	10	NEG	NEG	1	0	4	2	32	5	0.25	-2	32	5	8	3	BP
Cochabamba	596.73	POS	320	POS	NEG	640	POS	POS	320	POS	NEG	40	POS	NEG	0.5	-1	1	0	8	3	0.5	-1	16	4	8	3	BR
Cochabamba	58.9	POS	10	NEG	NEG	10	NEG	NEG	10	NEG	NEG	10	NEG	NEG	1	0	1	0	1	0	1	0	1	0	1	0	NEG
Cochabamba	974.55	POS	160	POS	NEG	320	POS	NEG	80	POS	NEG	10	NEG	NEG	0.5	-1	2	1	16	4	0.25	-2	32	5	8	3	BR
Cochabamba	131	POS	20	POS	NEG	10	NEG	NEG	10	NEG	NEG	10	NEG	NEG	2	1	2	1	2	1	1	0	1	0	1	0	BP
Cochabamba	1594.8	POS	320	POS	NEG	2560	POS	POS	320	POS	NEG	80	POS	NEG	0.125	-3	1	0	4	2	0.125	-3	32	5	4	2	BR
Cochabamba	53.163	POS	80	POS	NEG	40	POS	NEG	20	POS	NEG	10	NEG	NEG	2	1	4	2	8	3	0.5	-1	4	2	2	1	BP
Cochabamba	201.09	POS	160	POS	NEG	80	POS	NEG	40	POS	NEG	10	NEG	NEG	2	1	4	2	16	4	0.5	-1	8	3	4	2	BP
Cochabamba	1836.1	POS	1280	POS	POS	320	POS	NEG	160	POS	NEG	40	POS	NEG	4	2	8	3	32	5	0.5	-1	8	3	4	2	BP
Cochabamba	680.73	POS	80	POS	NEG	320	POS	NEG	160	POS	NEG	10	NEG	NEG	0.25	-2	0.5	-1	8	3	0.5	-1	32	5	16	4	BR
Cochabamba	5287.9	POS	2560	POS	POS	10240	POS	POS	1280	POS	POS	160	POS	NEG	0.25	-2	2	1	16	4	0.125	-3	64	6	8	3	BR
Cochabamba	107.54	POS	40	POS	NEG	80	POS	NEG	10	NEG	NEG	10	NEG	NEG	0.5	-1	4	2	4	2	0.125	-3	8	3	1	0	BR
Cochabamba	49.211	POS	20	POS	NEG	40	POS	NEG	10	NEG	NEG	10	NEG	NEG	0.5	-1	2	1	2	1	0.25	-2	4	2	1	0	BR
Cochabamba	2147.3	POS	5120	POS	POS	5120	POS	POS	5120	POS	POS	320	POS	NEG	1	0	1	0	16	4	1	0	16	4	16	4	BP
Cochabamba	4605.7	POS	640	POS	POS	20480	POS	POS	640	POS	POS	320	POS	NEG	0.03125	-5	1	0	2	1	0.03125	-5	64	6	2	1	BR
Cochabamba	96.438	POS	20	POS	NEG	40	POS	NEG	40	POS	NEG	10	NEG	NEG	0.5	-1	0.5	-1	2	1	1	0	4	2	4	2	BR
Cochabamba	4885.6	POS	640	POS	POS	1280	POS	POS	1280	POS	POS	80	POS	NEG	0.5	-1	0.5	-1	8	3	1	0	16	4	16	4	BR
Cochabamba	154.48	POS	160	POS	NEG	160	POS	NEG	80	POS	NEG	10	NEG	NEG	1	0	2	1	16	4	0.5	-1	16	4	8	3	BP
Cochabamba	52.398	POS	80	POS	NEG	40	POS	NEG	10	NEG	NEG	10	NEG	NEG	2	1	8	3	8	3	0.25	-2	4	2	1	0	BP
Cochabamba	24.89	NEG	20	POS	NEG	10	NEG	NEG	10	NEG	NEG	10	NEG	NEG	2	1	2	1	2	1	1	0	1	0	1	0	NEG_ELISA
Cochabamba	274.83	POS	40	POS	NEG	320	POS	NEG	20	POS	NEG	10	NEG	NEG	0.125	-3	2	1	4	2	0.0625	-4	32	5	2	1	BR
Cochabamba	68.091	POS	20	POS	NEG	10	NEG	NEG	10	NEG	NEG	10	NEG	NEG	2	1	2	1	2	1	1	0	1	0	1	0	BP
Cochabamba	3.2	NEG	NR	NEG	NEG	NR	NEG	NEG	NR	NEG	NEG	NR	NEG	NEG													NEG_ELISA
Cochabamba	126.54	POS	20	POS	NEG	20	POS	NEG	40	POS	NEG	10	NEG	NEG	1	0	0.5	-1	2	1	2	1	2	1	4	2	IN
Cochabamba	378.81	POS	320	POS	NEG	160	POS	NEG	160	POS	NEG	10	NEG	NEG	2	1	2	1	32	5	1	0	16	4	16	4	BP
Cochabamba	64	POS	20	POS	NEG	10	NEG	NEG	10	NEG	NEG	10	NEG	NEG	2	1	2	1	2	1	1	0	1	0	1	0	BP
Cochabamba	107.84	POS	10	NEG	NEG	10	NEG	NEG	10	NEG	NEG	10	NEG	NEG	1	0	1	0	1	0	1	0	1	0	1	0	NEG
Cochabamba	77.005	POS	10	NEG	NEG	40	POS	NEG	40	POS	NEG	10	NEG	NEG	0.25	-2	0.25	-2	1	0	1	0	4	2	4	2	BR
Cochabamba	271.01	POS	160	POS	NEG	640	POS	POS	40	POS	NEG	10	NEG	NEG	0.25	-2	4	2	16	4	0.0625	-4	64	6	4	2	BR
Cochabamba	241.7	POS	160	POS	NEG	320	POS	NEG	40	POS	NEG	10	NEG	NEG	0.5	-1	4	2	16	4	0.125	-3	32	5	4	2	BR
Cochabamba	100.97	POS	160	POS	NEG	80	POS	NEG	20	POS	NEG	10	NEG	NEG	2	1	8	3	16	4	0.25	-2	8	3	2	1	BP
Cochabamba	335.15	POS	40	POS	NEG	160	POS	NEG	20	POS	NEG	10	NEG	NEG	0.25	-2	2	1	4	2	0.125	-3	16	4	2	1	BR
Cochabamba	15.371	NEG	NR	NEG	NEG	NR	NEG	NEG	NR	NEG	NEG	NR	NEG	NEG													NEG_ELISA
Cochabamba	15.732	NEG	NR	NEG	NEG	NR	NEG	NEG	NR	NEG	NEG	NR	NEG	NEG													NEG_ELISA
Cochabamba	119.82	POS	80	POS	NEG	160	POS	NEG	20	POS	NEG	10	NEG	NEG	0.5	-1	4	2	8	3	0.125	-3	16	4	2	1	BR
Cochabamba	750.55	POS	160	POS	NEG	640	POS	POS	40	POS	NEG	10	NEG	NEG	0.25	-2	4	2	16	4	0.0625	-4	64	6	4	2	BR
Cochabamba	248.58	POS	160	POS	NEG	160	POS	NEG	40	POS	NEG	10	NEG	NEG	1	0	4	2	16	4	0.25	-2	16	4	4	2	BP
Cochabamba	140.18	POS	10	NEG	NEG	40	POS	NEG	10	NEG	NEG	10	NEG	NEG	0.25	-2	1	0	1	0	0.25	-2	4	2	1	0	BR
Cochabamba	24.047	NEG	160	POS	NEG	10	NEG	NEG	20	POS	NEG	10	NEG	NEG	16	4	8	3	16	4	2	1	1	0	2	1	NEG_ELISA
Cochabamba	22.239	NEG	160	POS	NEG	10	NEG	NEG	20	POS	NEG	10	NEG	NEG	16	4	8	3	16	4	2	1	1	0	2	1	NEG_ELISA
Cochabamba	353.71	POS	640	POS	POS	1280	POS	POS	160	POS	NEG	10	NEG	NEG	0.5	-1	4	2	64	6	0.125	-3	128	7	16	4	BR
Cochabamba	311.95	POS	640	POS	POS	160	POS	NEG	320	POS	NEG	10	NEG	NEG	4	2	2	1	64	6	2	1	16	4	32	5	BP
Cochabamba	218.39	POS	20	POS	NEG	80	POS	NEG	10	NEG	NEG	10	NEG	NEG	0.25	-2	2	1	2	1	0.125	-3	8	3	1	0	BR
Cochabamba	3679.3	POS	1280	POS	POS	5120	POS	POS	2560	POS	POS	160	POS	NEG	0.25	-2	0.5	-1	8	3	0.5	-1	32	5	16	4	BR
Cochabamba	118.94	POS	40	POS	NEG	80	POS	NEG	10	NEG	NEG	10	NEG	NEG	0.5	-1	4	2	4	2	0.125	-3	8	3	1	0	BR
Cochabamba	172.14	POS	160	POS	NEG	80	POS	NEG	80	POS	NEG	10	NEG	NEG	2	1	2	1	16	4	1	0	8	3	8	3	BP
Cochabamba	22.239	NEG	10	NEG	NEG	20	POS	NEG	10	NEG	NEG	10	NEG	NEG	0.5	-1	1	0	1	0	0.5	-1	2	1	1	0	NEG_ELISA
Cochabamba	17.54	NEG	NR	NEG	NEG	NR	NEG	NEG	NR	NEG	NEG	NR	NEG	NEG													NEG_ELISA
Cochabamba	16.455	NEG	NR	NEG	NEG	NR	NEG	NEG	NR	NEG	NEG	NR	NEG	NEG													NEG_ELISA
Cochabamba	48.829	POS	10	NEG	NEG	10	NEG	NEG	10	NEG	NEG	10	NEG	NEG	1	0	1	0	1	0	1	0	1	0	1	0	NEG
Cochabamba	57.371	POS	40	POS	NEG	10	NEG	NEG	20	POS	NEG	10	NEG	NEG	4	2	2	1	4	2	2	1	1	0	2	1	BP
Cochabamba	112.22	POS	80	POS	NEG	80	POS	NEG	160	POS	NEG	10	NEG	NEG	1	0	0.5	-1	8	3	2	1	8	3	16	4	IN
Cochabamba	125.81	POS	40	POS	NEG	160	POS	NEG	10	NEG	NEG	10	NEG	NEG	0.25	-2	4	2	4	2	0.0625	-4	16	4	1	0	BR
Cochabamba	65.607	POS	10	NEG	NEG	10	NEG	NEG	10	NEG	NEG	10	NEG	NEG	1	0	1	0	1	0	1	0	1	0	1	0	NEG
Cochabamba	128.71	POS	80	POS	NEG	20	POS	NEG	160	POS	NEG	10	NEG	NEG	4	2	0.5	-1	8	3	8	3	2	1	16	4	IN
Cochabamba	1850.1	POS	640	POS	POS	10240	POS	POS	320	POS	NEG	40	POS	NEG	0.0625	-4	2	1	16	4	0.03125	-5	256	8	8	3	BR
Cochabamba	326.41	POS	80	POS	NEG	320	POS	NEG	80	POS	NEG	10	NEG	NEG	0.25	-2	1	0	8	3	0.25	-2	32	5	8	3	BR
Cochabamba	4.164	NEG	NR	NEG	NEG	NR	NEG	NEG	NR	NEG	NEG	NR	NEG	NEG													NEG_ELISA
Cochabamba	40.924	POS	10	NEG	NEG	10	NEG	NEG	10	NEG	NEG	10	NEG	NEG	1	0	1	0	1	0	1	0	1	0	1	0	NEG
Cochabamba	88.84	POS	80	POS	NEG	40	POS	NEG	20	POS	NEG	10	NEG	NEG	2	1	4	2	8	3	0.5	-1	4	2	2	1	BP
Cochabamba	7.4176	NEG	NR	NEG	NEG	NR	NEG	NEG	NR	NEG	NEG	NR	NEG	NEG													NEG_ELISA
Cochabamba	2420.1	POS	80	POS	NEG	10	NEG	NEG	80	POS	NEG	10	NEG	NEG	8	3	1	0	8	3	8	3	1	0	8	3	BP
Cochabamba	35.765	POS	40	POS	NEG	10	NEG	NEG	10	NEG	NEG	10	NEG	NEG	4	2	4	2	4	2	1	0	1	0	1	0	BP
Cochabamba	132.43	POS	320	POS	NEG	320	POS	NEG	80	POS	NEG	10	NEG	NEG	1	0	4	2	32	5	0.25	-2	32	5	8	3	BP
Cochabamba	33.993	DOU	10	NEG	NEG	10	NEG	NEG	10	NEG	NEG	10	NEG	NEG	1	0	1	0	1	0	1	0	1	0	1	0	NEG
Cochabamba	81.508	POS	20	POS	NEG	80	POS	NEG	10	NEG	NEG	10	NEG	NEG	0.25	-2	2	1	2	1	0.125	-3	8	3	1	0	BR
Cochabamba	6.9521	NEG	NR	NEG	NEG	NR	NEG	NEG	NR	NEG	NEG	NR	NEG	NEG													NEG_ELISA
Cochabamba	22.569	NEG	40	POS	NEG	10	NEG	NEG	10	NEG	NEG	10	NEG	NEG	4	2	4	2	4	2	1	0	1	0	1	0	NEG_ELISA
Cochabamba	320.89	POS	80	POS	NEG	160	POS	NEG	10	NEG	NEG	10	NEG	NEG	0.5	-1	8	3	8	3	0.0625	-4	16	4	1	0	BR
Cochabamba	369.24	POS	160	POS	NEG	640	POS	POS	80	POS	NEG	20	POS	NEG	0.25	-2	2	1	8	3	0.125	-3	32	5	4	2	BR
Cochabamba	92.155	POS	160	POS	NEG	80	POS	NEG	40	POS	NEG	10	NEG	NEG	2	1	4	2	16	4	0.5	-1	8	3	4	2	BP
Cochabamba	205.37	POS	160	POS	NEG	80	POS	NEG	80	POS	NEG	10	NEG	NEG	2	1	2	1	16	4	1	0	8	3	8	3	BP
Cochabamba	23.685	NEG	10	NEG	NEG	10	NEG	NEG	10	NEG	NEG	10	NEG	NEG	1	0	1	0	1	0	1	0	1	0	1	0	NEG_ELISA
Cochabamba	2609.2	POS	640	POS	POS	1280	POS	POS	320	POS	NEG	20	POS	NEG	0.5	-1	2	1	32	5	0.25	-2	64	6	16	4	BR
Cochabamba	56.581	POS	320	POS	NEG	80	POS	NEG	40	POS	NEG	10	NEG	NEG	4	2	8	3	32	5	0.5	-1	8	3	4	2	BP
Cochabamba	16.687	NEG	NR	NEG	NEG	NR	NEG	NEG	NR	NEG	NEG	NR	NEG	NEG													NEG_ELISA
Cochabamba	161.81	POS	320	POS	NEG	640	POS	POS	40	POS	NEG	20	POS	NEG	0.5	-1	8	3	16	4	0.0625	-4	32	5	2	1	BR
Cochabamba	82.336	POS	40	POS	NEG	20	POS	NEG	20	POS	NEG	10	NEG	NEG	2	1	2	1	4	2	1	0	2	1	2	1	BP
Cochabamba	1128.7	POS	80	POS	NEG	160	POS	NEG	40	POS	NEG	10	NEG	NEG	0.5	-1	2	1	8	3	0.25	-2	16	4	4	2	BR
Cochabamba	24.597	NEG	80	POS	NEG	10	NEG	NEG	10	NEG	NEG	10	NEG	NEG	8	3	8	3	8	3	1	0	1	0	1	0	NEG_ELISA
Cochabamba	360.84	POS	640	POS	POS	2560	POS	POS	320	POS	NEG	20	POS	NEG	0.25	-2	2	1	32	5	0.125	-3	128	7	16	4	BR
Cochabamba	878.55	POS	320	POS	NEG	320	POS	NEG	40	POS	NEG	10	NEG	NEG	1	0	8	3	32	5	0.125	-3	32	5	4	2	BP
Cochabamba	16.282	NEG	NR	NEG	NEG	NR	NEG	NEG	NR	NEG	NEG	NR	NEG	NEG													NEG_ELISA
Cochabamba	268.72	POS	80	POS	NEG	160	POS	NEG	20	POS	NEG	10	NEG	NEG	0.5	-1	4	2	8	3	0.125	-3	16	4	2	1	BR
Cochabamba	2024.9	POS	640	POS	POS	2560	POS	POS	320	POS	NEG	40	POS	NEG	0.25	-2	2	1	16	4	0.125	-3	64	6	8	3	BR
Cochabamba	225.55	POS	80	POS	NEG	160	POS	NEG	10	NEG	NEG	10	NEG	NEG	0.5	-1	8	3	8	3	0.0625	-4	16	4	1	0	BR
Cochabamba	26.828	DOU	20	POS	NEG	20	POS	NEG	10	NEG	NEG	10	NEG	NEG	1	0	2	1	2	1	0.5	-1	2	1	1	0	BP
Cochabamba	974.55	POS	320	POS	NEG	320	POS	NEG	160	POS	NEG	10	NEG	NEG	1	0	2	1	32	5	0.5	-1	32	5	16	4	BP
Cochabamba	21.555	NEG	NR	NEG	NEG	NR	NEG	NEG	NR	NEG	NEG	NR	NEG	NEG													NEG_ELISA
Cochabamba	60.235	POS	20	POS	NEG	10	NEG	NEG	20	POS	NEG	10	NEG	NEG	2	1	1	0	2	1	2	1	1	0	2	1	BP
Cochabamba	233.52	POS	160	POS	NEG	640	POS	POS	160	POS	NEG	10	NEG	NEG	0.25	-2	1	0	16	4	0.25	-2	64	6	16	4	BR
Cochabamba	782.55	POS	160	POS	NEG	320	POS	NEG	320	POS	NEG	10	NEG	NEG	0.5	-1	0.5	-1	16	4	1	0	32	5	32	5	BR
Cochabamba	6588.9	POS	10240	POS	POS	5120	POS	POS	1280	POS	POS	320	POS	NEG	2	1	8	3	32	5	0.25	-2	16	4	4	2	BP
Cochabamba	13.949	NEG	NR	NEG	NEG	NR	NEG	NEG	NR	NEG	NEG	NR	NEG	NEG													NEG_ELISA
Cochabamba	4.3155	NEG	NR	NEG	NEG	NR	NEG	NEG	NR	NEG	NEG	NR	NEG	NEG													NEG_ELISA
Cochabamba	70.152	POS	20	POS	NEG	80	POS	NEG	20	POS	NEG	10	NEG	NEG	0.25	-2	1	0	2	1	0.25	-2	8	3	2	1	BR
Cochabamba	2042.4	POS	640	POS	POS	640	POS	POS	160	POS	NEG	20	POS	NEG	1	0	4	2	32	5	0.25	-2	32	5	8	3	BP
Cochabamba	50.159	POS	40	POS	NEG	10	NEG	NEG	10	NEG	NEG	10	NEG	NEG	4	2	4	2	4	2	1	0	1	0	1	0	BP
Cochabamba	119.36	POS	80	POS	NEG	40	POS	NEG	20	POS	NEG	10	NEG	NEG	2	1	4	2	8	3	0.5	-1	4	2	2	1	BP
Cochabamba	12.732	NEG	NR	NEG	NEG	NR	NEG	NEG	NR	NEG	NEG	NR	NEG	NEG													NEG_ELISA
Cochabamba	820.36	POS	160	POS	NEG	80	POS	NEG	80	POS	NEG	10	NEG	NEG	2	1	2	1	16	4	1	0	8	3	8	3	BP
Cochabamba	12.225	NEG	NR	NEG	NEG	NR	NEG	NEG	NR	NEG	NEG	NR	NEG	NEG													NEG_ELISA
Cochabamba	64.118	POS	10	NEG	NEG	10	NEG	NEG	10	NEG	NEG	10	NEG	NEG	1	0	1	0	1	0	1	0	1	0	1	0	NEG
Cochabamba	62.45	POS	10	NEG	NEG	10	NEG	NEG	20	POS	NEG	10	NEG	NEG	1	0	0.5	-1	1	0	2	1	1	0	2	1	IN
Cochabamba	44.401	POS	40	POS	NEG	20	POS	NEG	10	NEG	NEG	10	NEG	NEG	2	1	4	2	4	2	0.5	-1	2	1	1	0	BP
Cochabamba	36.318	POS	80	POS	NEG	10	NEG	NEG	40	POS	NEG	10	NEG	NEG	8	3	2	1	8	3	4	2	1	0	4	2	BP
Cochabamba	4965	POS	640	POS	POS	5120	POS	POS	1280	POS	POS	40	POS	NEG	0.125	-3	0.5	-1	16	4	0.25	-2	128	7	32	5	BR
Cochabamba	15.47	NEG	NR	NEG	NEG	NR	NEG	NEG	NR	NEG	NEG	NR	NEG	NEG													NEG_ELISA
Cochabamba	115.7	POS	20	POS	NEG	80	POS	NEG	40	POS	NEG	10	NEG	NEG	0.25	-2	0.5	-1	2	1	0.5	-1	8	3	4	2	BR
Cochabamba	10.4	NEG	NR	NEG	NEG	NR	NEG	NEG	NR	NEG	NEG	NR	NEG	NEG													NEG_ELISA
Cochabamba	1983	POS	640	POS	POS	640	POS	POS	1280	POS	POS	20	POS	NEG	1	0	0.5	-1	32	5	2	1	32	5	64	6	IN
Cochabamba	26.93	DOU	10	NEG	NEG	10	NEG	NEG	10	NEG	NEG	10	NEG	NEG	1	0	1	0	1	0	1	0	1	0	1	0	NEG
Cochabamba	80.68	POS	80	POS	NEG	40	POS	NEG	20	POS	NEG	10	NEG	NEG	2	1	4	2	8	3	0.5	-1	4	2	2	1	BP
Cochabamba	1605.2	POS	320	POS	NEG	160	POS	NEG	160	POS	NEG	10	NEG	NEG	2	1	2	1	32	5	1	0	16	4	16	4	BP
Cochabamba	18.411	NEG	NR	NEG	NEG	NR	NEG	NEG	NR	NEG	NEG	NR	NEG	NEG													NEG_ELISA
Cochabamba	13.746	NEG	NR	NEG	NEG	NR	NEG	NEG	NR	NEG	NEG	NR	NEG	NEG													NEG_ELISA
Cochabamba	20.642	NEG	NR	NEG	NEG	NR	NEG	NEG	NR	NEG	NEG	NR	NEG	NEG													NEG_ELISA
Cochabamba	31.797	DOU	20	POS	NEG	10	NEG	NEG	10	NEG	NEG	10	NEG	NEG	2	1	2	1	2	1	1	0	1	0	1	0	BP
Cochabamba	221.12	POS	320	POS	NEG	320	POS	NEG	40	POS	NEG	10	NEG	NEG	1	0	8	3	32	5	0.125	-3	32	5	4	2	BP
Cochabamba	86.004	POS	80	POS	NEG	40	POS	NEG	20	POS	NEG	10	NEG	NEG	2	1	4	2	8	3	0.5	-1	4	2	2	1	BP
Cochabamba	7057.9	POS	640	POS	POS	5120	POS	POS	640	POS	POS	20	POS	NEG	0.125	-3	1	0	32	5	0.125	-3	256	8	32	5	BR
El_Alto	3390.2	POS	2560	POS	POS	1280	POS	POS	1280	POS	POS	640	POS	POS	2	1	2	1	4	2	1	0	2	1	2	1	BP
El_Alto	3568.4	POS	2560	POS	POS	1280	POS	POS	1280	POS	POS	160	POS	NEG	2	1	2	1	16	4	1	0	8	3	8	3	BP
El_Alto	3.07	NEG	NR	NEG	NEG	NR	NEG	NEG	NR	NEG	NEG	NR	NEG	NEG													NEG_ELISA
El_Alto	22.91	NEG	10	NEG	NEG	10	NEG	NEG	10	NEG	NEG	10	NEG	NEG	1	0	1	0	1	0	1	0	1	0	1	0	NEG_ELISA
El_Alto	21.858	NEG	10	NEG	NEG	10	NEG	NEG	10	NEG	NEG	10	NEG	NEG	1	0	1	0	1	0	1	0	1	0	1	0	NEG_ELISA
El_Alto	2268.7	POS	2560	POS	POS	640	POS	POS	640	POS	POS	320	POS	NEG	4	2	4	2	8	3	1	0	2	1	2	1	BP
El_Alto	3.7741	NEG	NR	NEG	NEG	NR	NEG	NEG	NR	NEG	NEG	NR	NEG	NEG													NEG_ELISA
El_Alto	288.85	POS	80	POS	NEG	160	POS	NEG	40	POS	NEG	10	NEG	NEG	0.5	-1	2	1	8	3	0.25	-2	16	4	4	2	BR
El_Alto	407.85	POS	640	POS	POS	160	POS	NEG	160	POS	NEG	40	POS	NEG	4	2	4	2	16	4	1	0	4	2	4	2	BP
El_Alto	620.29	POS	20	POS	NEG	10	NEG	NEG	10	NEG	NEG	10	NEG	NEG	2	1	2	1	2	1	1	0	1	0	1	0	BP
El_Alto	15.926	NEG	NR	NEG	NEG	NR	NEG	NEG	NR	NEG	NEG	NR	NEG	NEG													NEG_ELISA
El_Alto	2125.9	POS	160	POS	NEG	80	POS	NEG	320	POS	NEG	80	POS	NEG	2	1	0.5	-1	2	1	4	2	1	0	4	2	IN
El_Alto	3.07	NEG	NR	NEG	NEG	NR	NEG	NEG	NR	NEG	NEG	NR	NEG	NEG													NEG_ELISA
El_Alto	2072.6	POS	1280	POS	POS	1280	POS	POS	1280	POS	POS	80	POS	NEG	1	0	1	0	16	4	1	0	16	4	16	4	BP
El_Alto	190.72	POS	80	POS	NEG	320	POS	NEG	80	POS	NEG	40	POS	NEG	0.25	-2	1	0	2	1	0.25	-2	8	3	2	1	BR
El_Alto	22.145	NEG	10	NEG	NEG	10	NEG	NEG	10	NEG	NEG	10	NEG	NEG	1	0	1	0	1	0	1	0	1	0	1	0	NEG_ELISA
El_Alto	208.61	POS	40	POS	NEG	20	POS	NEG	10	NEG	NEG	10	NEG	NEG	2	1	4	2	4	2	0.5	-1	2	1	1	0	BP
El_Alto	378.9	POS	40	POS	NEG	320	POS	NEG	160	POS	NEG	10	NEG	NEG	0.125	-3	0.25	-2	4	2	0.5	-1	32	5	16	4	BR
El_Alto	18859	POS	10240	POS	POS	1280	POS	POS	5120	POS	POS	640	POS	POS	8	3	2	1	16	4	4	2	2	1	8	3	BP
El_Alto	4424.3	POS	1280	POS	POS	1280	POS	POS	2560	POS	POS	640	POS	POS	1	0	0.5	-1	2	1	2	1	2	1	4	2	IN
El_Alto	768.52	POS	320	POS	NEG	80	POS	NEG	80	POS	NEG	40	POS	NEG	4	2	4	2	8	3	1	0	2	1	2	1	BP
El_Alto	361.86	POS	160	POS	NEG	1280	POS	POS	40	POS	NEG	20	POS	NEG	0.125	-3	4	2	8	3	0.03125	-5	64	6	2	1	BR
El_Alto	3952.9	POS	2560	POS	POS	1280	POS	POS	1280	POS	POS	40	POS	NEG	2	1	2	1	64	6	1	0	32	5	32	5	BP
El_Alto	15.247	NEG	NR	NEG	NEG	NR	NEG	NEG	NR	NEG	NEG	NR	NEG	NEG													NEG_ELISA
El_Alto	679.34	POS	640	POS	POS	320	POS	NEG	160	POS	NEG	160	POS	NEG	2	1	4	2	4	2	0.5	-1	2	1	1	0	BP
El_Alto	251.74	POS	80	POS	NEG	640	POS	POS	160	POS	NEG	10	NEG	NEG	0.125	-3	0.5	-1	8	3	0.25	-2	64	6	16	4	BR
El_Alto	47.61	POS	20	POS	NEG	20	POS	NEG	10	NEG	NEG	10	NEG	NEG	1	0	2	1	2	1	0.5	-1	2	1	1	0	BP
El_Alto	301.68	POS	40	POS	NEG	80	POS	NEG	80	POS	NEG	10	NEG	NEG	0.5	-1	0.5	-1	4	2	1	0	8	3	8	3	BR
El_Alto	1159.3	POS	640	POS	POS	80	POS	NEG	320	POS	NEG	20	POS	NEG	8	3	2	1	32	5	4	2	4	2	16	4	BP
El_Alto	180.82	POS	40	POS	NEG	80	POS	NEG	10	NEG	NEG	10	NEG	NEG	0.5	-1	4	2	4	2	0.125	-3	8	3	1	0	BR
El_Alto	335.94	POS	40	POS	NEG	320	POS	NEG	80	POS	NEG	20	POS	NEG	0.125	-3	0.5	-1	2	1	0.25	-2	16	4	4	2	BR
El_Alto	23.384	NEG	10	NEG	NEG	10	NEG	NEG	10	NEG	NEG	10	NEG	NEG	1	0	1	0	1	0	1	0	1	0	1	0	NEG_ELISA
El_Alto	94.161	POS	20	POS	NEG	80	POS	NEG	40	POS	NEG	20	POS	NEG	0.25	-2	0.5	-1	1	0	0.5	-1	4	2	2	1	BR
El_Alto	212.13	POS	40	POS	NEG	20	POS	NEG	20	POS	NEG	10	NEG	NEG	2	1	2	1	4	2	1	0	2	1	2	1	BP
El_Alto	95.755	POS	20	POS	NEG	10	NEG	NEG	10	NEG	NEG	10	NEG	NEG	2	1	2	1	2	1	1	0	1	0	1	0	BP
El_Alto	6792.9	POS	10240	POS	POS	1280	POS	POS	1280	POS	POS	160	POS	NEG	8	3	8	3	64	6	1	0	8	3	8	3	BP
El_Alto	246.2	POS	80	POS	NEG	320	POS	NEG	10	NEG	NEG	10	NEG	NEG	0.25	-2	8	3	8	3	0.03125	-5	32	5	1	0	BR
El_Alto	213.4	POS	10	NEG	NEG	10	NEG	NEG	10	NEG	NEG	10	NEG	NEG	1	0	1	0	1	0	1	0	1	0	1	0	NEG
El_Alto	14200	POS	20480	POS	POS	5120	POS	POS	2560	POS	POS	640	POS	POS	4	2	8	3	32	5	0.5	-1	8	3	4	2	BP
El_Alto	999.34	POS	1280	POS	POS	160	POS	NEG	160	POS	NEG	80	POS	NEG	8	3	8	3	16	4	1	0	2	1	2	1	BP
El_Alto	213.62	POS	40	POS	NEG	80	POS	NEG	20	POS	NEG	10	NEG	NEG	0.5	-1	2	1	4	2	0.25	-2	8	3	2	1	BR
El_Alto	464.79	POS	1280	POS	POS	640	POS	POS	320	POS	NEG	80	POS	NEG	2	1	4	2	16	4	0.5	-1	8	3	4	2	BP
El_Alto	57.268	POS	20	POS	NEG	10	NEG	NEG	10	NEG	NEG	10	NEG	NEG	2	1	2	1	2	1	1	0	1	0	1	0	BP
El_Alto	51.317	POS	80	POS	NEG	20	POS	NEG	20	POS	NEG	10	NEG	NEG	4	2	4	2	8	3	1	0	2	1	2	1	BP
El_Alto	5132.7	POS	5120	POS	POS	2560	POS	POS	1280	POS	POS	640	POS	POS	2	1	4	2	8	3	0.5	-1	4	2	2	1	BP
El_Alto	589.63	POS	640	POS	POS	80	POS	NEG	160	POS	NEG	20	POS	NEG	8	3	4	2	32	5	2	1	4	2	8	3	BP
El_Alto	526.11	POS	40	POS	NEG	10	NEG	NEG	10	NEG	NEG	10	NEG	NEG	4	2	4	2	4	2	1	0	1	0	1	0	BP
El_Alto	306.44	POS	80	POS	NEG	160	POS	NEG	40	POS	NEG	10	NEG	NEG	0.5	-1	2	1	8	3	0.25	-2	16	4	4	2	BR
El_Alto	620.29	POS	320	POS	NEG	320	POS	NEG	160	POS	NEG	160	POS	NEG	1	0	2	1	2	1	0.5	-1	2	1	1	0	BP
El_Alto	252.81	POS	80	POS	NEG	40	POS	NEG	40	POS	NEG	10	NEG	NEG	2	1	2	1	8	3	1	0	4	2	4	2	BP
El_Alto	157.6	POS	20	POS	NEG	320	POS	NEG	40	POS	NEG	10	NEG	NEG	0.0625	-4	0.5	-1	2	1	0.125	-3	32	5	4	2	BR
El_Alto	3.18	NEG	NR	NEG	NEG	NR	NEG	NEG	NR	NEG	NEG	NR	NEG	NEG													NEG_ELISA
El_Alto	2389.1	POS	2560	POS	POS	1280	POS	POS	1280	POS	POS	160	POS	NEG	2	1	2	1	16	4	1	0	8	3	8	3	BP
El_Alto	572.11	POS	2560	POS	POS	320	POS	NEG	320	POS	NEG	80	POS	NEG	8	3	8	3	32	5	1	0	4	2	4	2	BP
El_Alto	49.366	POS	40	POS	NEG	40	POS	NEG	10	NEG	NEG	10	NEG	NEG	1	0	4	2	4	2	0.25	-2	4	2	1	0	BP
El_Alto	326.19	POS	320	POS	NEG	160	POS	NEG	80	POS	NEG	10	NEG	NEG	2	1	4	2	32	5	0.5	-1	16	4	8	3	BP
El_Alto	155.47	POS	80	POS	NEG	160	POS	NEG	160	POS	NEG	20	POS	NEG	0.5	-1	0.5	-1	4	2	1	0	8	3	8	3	BR
El_Alto	53.756	POS	10	NEG	NEG	10	NEG	NEG	10	NEG	NEG	10	NEG	NEG	1	0	1	0	1	0	1	0	1	0	1	0	NEG
El_Alto	2375.1	POS	640	POS	POS	1280	POS	POS	640	POS	POS	320	POS	NEG	0.5	-1	1	0	2	1	0.5	-1	4	2	2	1	BR
El_Alto	539.25	POS	320	POS	NEG	80	POS	NEG	160	POS	NEG	40	POS	NEG	4	2	2	1	8	3	2	1	2	1	4	2	BP
El_Alto	852.46	POS	80	POS	NEG	320	POS	NEG	20	POS	NEG	10	NEG	NEG	0.25	-2	4	2	8	3	0.0625	-4	32	5	2	1	BR
El_Alto	2193.1	POS	1280	POS	POS	320	POS	NEG	640	POS	POS	40	POS	NEG	4	2	2	1	32	5	2	1	8	3	16	4	BP
El_Alto	6628.1	POS	20480	POS	POS	1280	POS	POS	5120	POS	POS	640	POS	POS	16	4	4	2	32	5	4	2	2	1	8	3	BP
El_Alto	1935.4	POS	5120	POS	POS	320	POS	NEG	640	POS	POS	80	POS	NEG	16	4	8	3	64	6	2	1	4	2	8	3	BP
El_Alto	128.43	POS	80	POS	NEG	40	POS	NEG	40	POS	NEG	10	NEG	NEG	2	1	2	1	8	3	1	0	4	2	4	2	BP
El_Alto	264.8	POS	80	POS	NEG	40	POS	NEG	80	POS	NEG	10	NEG	NEG	2	1	1	0	8	3	2	1	4	2	8	3	BP
El_Alto	456.03	POS	80	POS	NEG	160	POS	NEG	20	POS	NEG	20	POS	NEG	0.5	-1	4	2	4	2	0.125	-3	8	3	1	0	BR
El_Alto	578.68	POS	640	POS	POS	320	POS	NEG	160	POS	NEG	160	POS	NEG	2	1	4	2	4	2	0.5	-1	2	1	1	0	BP
El_Alto	111.69	POS	80	POS	NEG	40	POS	NEG	40	POS	NEG	10	NEG	NEG	2	1	2	1	8	3	1	0	4	2	4	2	BP
El_Alto	3.2	NEG	NR	NEG	NEG	NR	NEG	NEG	NR	NEG	NEG	NR	NEG	NEG													NEG_ELISA
El_Alto	140.78	POS	80	POS	NEG	320	POS	NEG	40	POS	NEG	10	NEG	NEG	0.25	-2	2	1	8	3	0.125	-3	32	5	4	2	BR
El_Alto	13260	POS	10240	POS	POS	10240	POS	POS	1280	POS	POS	640	POS	POS	1	0	8	3	16	4	0.125	-3	16	4	2	1	BP
El_Alto	39.512	POS	20	POS	NEG	20	POS	NEG	10	NEG	NEG	10	NEG	NEG	1	0	2	1	2	1	0.5	-1	2	1	1	0	BP
El_Alto	700.33	POS	1280	POS	POS	80	POS	NEG	160	POS	NEG	40	POS	NEG	16	4	8	3	32	5	2	1	2	1	4	2	BP
El_Alto	207.23	POS	160	POS	NEG	160	POS	NEG	320	POS	NEG	10	NEG	NEG	1	0	0.5	-1	16	4	2	1	16	4	32	5	IN
El_Alto	1088.5	POS	5120	POS	POS	320	POS	NEG	640	POS	POS	160	POS	NEG	16	4	8	3	32	5	2	1	2	1	4	2	BP
El_Alto	112.06	POS	160	POS	NEG	80	POS	NEG	160	POS	NEG	20	POS	NEG	2	1	1	0	8	3	2	1	4	2	8	3	BP
El_Alto	254.08	POS	80	POS	NEG	160	POS	NEG	40	POS	NEG	20	POS	NEG	0.5	-1	2	1	4	2	0.25	-2	8	3	2	1	BR
El_Alto	3466.7	POS	320	POS	NEG	1280	POS	POS	320	POS	NEG	40	POS	NEG	0.25	-2	1	0	8	3	0.25	-2	32	5	8	3	BR
El_Alto	815.74	POS	80	POS	NEG	160	POS	NEG	160	POS	NEG	40	POS	NEG	0.5	-1	0.5	-1	2	1	1	0	4	2	4	2	BR
El_Alto	925.9	POS	80	POS	NEG	40	POS	NEG	160	POS	NEG	20	POS	NEG	2	1	0.5	-1	4	2	4	2	2	1	8	3	IN
El_Alto	127.74	POS	40	POS	NEG	160	POS	NEG	80	POS	NEG	10	NEG	NEG	0.25	-2	0.5	-1	4	2	0.5	-1	16	4	8	3	BR
El_Alto	87.689	POS	10	NEG	NEG	10	NEG	NEG	10	NEG	NEG	10	NEG	NEG	1	0	1	0	1	0	1	0	1	0	1	0	NEG
El_Alto	210.84	POS	80	POS	NEG	320	POS	NEG	320	POS	NEG	10	NEG	NEG	0.25	-2	0.25	-2	8	3	1	0	32	5	32	5	BR
El_Alto	677.93	POS	640	POS	POS	640	POS	POS	160	POS	NEG	80	POS	NEG	1	0	4	2	8	3	0.25	-2	8	3	2	1	BP
El_Alto	2051.1	POS	5120	POS	POS	2560	POS	POS	640	POS	POS	320	POS	NEG	2	1	8	3	16	4	0.25	-2	8	3	2	1	BP
El_Alto	79.967	POS	10	NEG	NEG	40	POS	NEG	10	NEG	NEG	10	NEG	NEG	0.25	-2	1	0	1	0	0.25	-2	4	2	1	0	BR
El_Alto	126.04	POS	40	POS	NEG	160	POS	NEG	10	NEG	NEG	10	NEG	NEG	0.25	-2	4	2	4	2	0.0625	-4	16	4	1	0	BR
El_Alto	2088.1	POS	2560	POS	POS	5120	POS	POS	640	POS	POS	640	POS	POS	0.5	-1	4	2	4	2	0.125	-3	8	3	1	0	BR
El_Alto	189.34	POS	160	POS	NEG	160	POS	NEG	80	POS	NEG	10	NEG	NEG	1	0	2	1	16	4	0.5	-1	16	4	8	3	BP
El_Alto	6778.8	POS	1280	POS	POS	10240	POS	POS	1280	POS	POS	640	POS	POS	0.125	-3	1	0	2	1	0.125	-3	16	4	2	1	BR
El_Alto	2912.1	POS	640	POS	POS	2560	POS	POS	320	POS	NEG	320	POS	NEG	0.25	-2	2	1	2	1	0.125	-3	8	3	1	0	BR
El_Alto	333.5	POS	40	POS	NEG	640	POS	POS	80	POS	NEG	10	NEG	NEG	0.0625	-4	0.5	-1	4	2	0.125	-3	64	6	8	3	BR
El_Alto	110.46	POS	80	POS	NEG	80	POS	NEG	160	POS	NEG	10	NEG	NEG	1	0	0.5	-1	8	3	2	1	8	3	16	4	IN
El_Alto	3.5329	NEG	NR	NEG	NEG	NR	NEG	NEG	NR	NEG	NEG	NR	NEG	NEG													NEG_ELISA
El_Alto	29.003	DOU	20	POS	NEG	80	POS	NEG	10	NEG	NEG	10	NEG	NEG	0.25	-2	2	1	2	1	0.125	-3	8	3	1	0	BR
El_Alto	104.44	POS	20	POS	NEG	160	POS	NEG	80	POS	NEG	10	NEG	NEG	0.125	-3	0.25	-2	2	1	0.5	-1	16	4	8	3	BR
El_Alto	718.22	POS	80	POS	NEG	40	POS	NEG	20	POS	NEG	40	POS	NEG	2	1	4	2	2	1	0.5	-1	1	0	0.5	-1	BP
El_Alto	131.35	POS	20	POS	NEG	20	POS	NEG	40	POS	NEG	10	NEG	NEG	1	0	0.5	-1	2	1	2	1	2	1	4	2	IN
El_Alto	3.5329	NEG	NR	NEG	NEG	NR	NEG	NEG	NR	NEG	NEG	NR	NEG	NEG													NEG_ELISA
El_Alto	25397	POS	20480	POS	POS	10240	POS	POS	2560	POS	POS	320	POS	NEG	2	1	8	3	64	6	0.25	-2	32	5	8	3	BP
El_Alto	122.76	POS	160	POS	NEG	320	POS	NEG	320	POS	NEG	10	NEG	NEG	0.5	-1	0.5	-1	16	4	1	0	32	5	32	5	BR
El_Alto	22819	POS	5120	POS	POS	2560	POS	POS	5120	POS	POS	320	POS	NEG	2	1	1	0	16	4	2	1	8	3	16	4	BP
El_Alto	277.75	POS	80	POS	NEG	640	POS	POS	320	POS	NEG	20	POS	NEG	0.125	-3	0.25	-2	4	2	0.5	-1	32	5	16	4	BR
El_Alto	110.72	POS	80	POS	NEG	40	POS	NEG	20	POS	NEG	10	NEG	NEG	2	1	4	2	8	3	0.5	-1	4	2	2	1	BP
El_Alto	3885.6	POS	5120	POS	POS	5120	POS	POS	640	POS	POS	640	POS	POS	1	0	8	3	8	3	0.125	-3	8	3	1	0	BP
El_Alto	1366.4	POS	1280	POS	POS	2560	POS	POS	160	POS	NEG	160	POS	NEG	0.5	-1	8	3	8	3	0.0625	-4	16	4	1	0	BR
El_Alto	82.323	POS	40	POS	NEG	40	POS	NEG	10	NEG	NEG	10	NEG	NEG	1	0	4	2	4	2	0.25	-2	4	2	1	0	BP
El_Alto	656.59	POS	640	POS	POS	640	POS	POS	160	POS	NEG	80	POS	NEG	1	0	4	2	8	3	0.25	-2	8	3	2	1	BP
El_Alto	18.432	NEG	NR	NEG	NEG	NR	NEG	NEG	NR	NEG	NEG	NR	NEG	NEG													NEG_ELISA
El_Alto	332.25	POS	160	POS	NEG	640	POS	POS	320	POS	NEG	40	POS	NEG	0.25	-2	0.5	-1	4	2	0.5	-1	16	4	8	3	BR
El_Alto	239.63	POS	80	POS	NEG	40	POS	NEG	40	POS	NEG	10	NEG	NEG	2	1	2	1	8	3	1	0	4	2	4	2	BP
El_Alto	4.5318	NEG	NR	NEG	NEG	NR	NEG	NEG	NR	NEG	NEG	NR	NEG	NEG													NEG_ELISA
El_Alto	166.85	POS	40	POS	NEG	160	POS	NEG	160	POS	NEG	10	NEG	NEG	0.25	-2	0.25	-2	4	2	1	0	16	4	16	4	BR
El_Alto	588.89	POS	320	POS	NEG	320	POS	NEG	80	POS	NEG	10	NEG	NEG	1	0	4	2	32	5	0.25	-2	32	5	8	3	BP
El_Alto	71.984	POS	10	NEG	NEG	10	NEG	NEG	10	NEG	NEG	10	NEG	NEG	1	0	1	0	1	0	1	0	1	0	1	0	NEG
El_Alto	230.95	POS	80	POS	NEG	160	POS	NEG	80	POS	NEG	20	POS	NEG	0.5	-1	1	0	4	2	0.5	-1	8	3	4	2	BR
El_Alto	3.1	NEG	NR	NEG	NEG	NR	NEG	NEG	NR	NEG	NEG	NR	NEG	NEG													NEG_ELISA
El_Alto	131.35	POS	80	POS	NEG	40	POS	NEG	40	POS	NEG	10	NEG	NEG	2	1	2	1	8	3	1	0	4	2	4	2	BP
El_Alto	696.89	POS	160	POS	NEG	640	POS	POS	80	POS	NEG	160	POS	NEG	0.25	-2	2	1	1	0	0.125	-3	4	2	0.5	-1	BR
El_Alto	3.14	NEG	NR	NEG	NEG	NR	NEG	NEG	NR	NEG	NEG	NR	NEG	NEG													NEG_ELISA
El_Alto	782.22	POS	320	POS	NEG	1280	POS	POS	320	POS	NEG	160	POS	NEG	0.25	-2	1	0	2	1	0.25	-2	8	3	2	1	BR
El_Alto	708.74	POS	320	POS	NEG	1280	POS	POS	320	POS	NEG	80	POS	NEG	0.25	-2	1	0	4	2	0.25	-2	16	4	4	2	BR
El_Alto	3.18	NEG	NR	NEG	NEG	NR	NEG	NEG	NR	NEG	NEG	NR	NEG	NEG													NEG_ELISA
El_Alto	162.12	POS	80	POS	NEG	320	POS	NEG	80	POS	NEG	20	POS	NEG	0.25	-2	1	0	4	2	0.25	-2	16	4	4	2	BR
El_Alto	91.223	POS	160	POS	NEG	1280	POS	POS	320	POS	NEG	40	POS	NEG	0.125	-3	0.5	-1	4	2	0.25	-2	32	5	8	3	BR
El_Alto	193.87	POS	80	POS	NEG	320	POS	NEG	160	POS	NEG	160	POS	NEG	0.25	-2	0.5	-1	0.5	-1	0.5	-1	2	1	1	0	BR
El_Alto	579.06	POS	160	POS	NEG	320	POS	NEG	40	POS	NEG	20	POS	NEG	0.5	-1	4	2	8	3	0.125	-3	16	4	2	1	BR
El_Alto	211.43	POS	80	POS	NEG	160	POS	NEG	80	POS	NEG	20	POS	NEG	0.5	-1	1	0	4	2	0.5	-1	8	3	4	2	BR
El_Alto	171.19	POS	80	POS	NEG	40	POS	NEG	320	POS	NEG	10	NEG	NEG	2	1	0.25	-2	8	3	8	3	4	2	32	5	IN
El_Alto	1323.2	POS	1280	POS	POS	2560	POS	POS	320	POS	NEG	80	POS	NEG	0.5	-1	4	2	16	4	0.125	-3	32	5	4	2	BR
El_Alto	3.06	NEG	NR	NEG	NEG	NR	NEG	NEG	NR	NEG	NEG	NR	NEG	NEG													NEG_ELISA
El_Alto	3.14	NEG	NR	NEG	NEG	NR	NEG	NEG	NR	NEG	NEG	NR	NEG	NEG													NEG_ELISA
El_Alto	3.7827	NEG	NR	NEG	NEG	NR	NEG	NEG	NR	NEG	NEG	NR	NEG	NEG													NEG_ELISA
El_Alto	225.23	POS	160	POS	NEG	80	POS	NEG	320	POS	NEG	20	POS	NEG	2	1	0.5	-1	8	3	4	2	4	2	16	4	IN
El_Alto	252.65	POS	80	POS	NEG	40	POS	NEG	40	POS	NEG	10	NEG	NEG	2	1	2	1	8	3	1	0	4	2	4	2	BP
El_Alto	3.2	NEG	NR	NEG	NEG	NR	NEG	NEG	NR	NEG	NEG	NR	NEG	NEG													NEG_ELISA
El_Alto	535.81	POS	640	POS	POS	1280	POS	POS	160	POS	NEG	40	POS	NEG	0.5	-1	4	2	16	4	0.125	-3	32	5	4	2	BR
El_Alto	213.2	POS	40	POS	NEG	80	POS	NEG	40	POS	NEG	10	NEG	NEG	0.5	-1	1	0	4	2	0.5	-1	8	3	4	2	BR
El_Alto	325.95	POS	80	POS	NEG	320	POS	NEG	160	POS	NEG	10	NEG	NEG	0.25	-2	0.5	-1	8	3	0.5	-1	32	5	16	4	BR
El_Alto	33230	POS	10240	POS	POS	5120	POS	POS	5120	POS	POS	80	POS	NEG	2	1	2	1	128	7	1	0	64	6	64	6	BP
El_Alto	166.56	POS	40	POS	NEG	80	POS	NEG	10	NEG	NEG	10	NEG	NEG	0.5	-1	4	2	4	2	0.125	-3	8	3	1	0	BR
El_Alto	215.62	POS	80	POS	NEG	160	POS	NEG	20	POS	NEG	20	POS	NEG	0.5	-1	4	2	4	2	0.125	-3	8	3	1	0	BR
El_Alto	2781.7	POS	5120	POS	POS	10240	POS	POS	1280	POS	POS	640	POS	POS	0.5	-1	4	2	8	3	0.125	-3	16	4	2	1	BR
El_Alto	299.76	POS	80	POS	NEG	160	POS	NEG	40	POS	NEG	10	NEG	NEG	0.5	-1	2	1	8	3	0.25	-2	16	4	4	2	BR
El_Alto	694.52	POS	1280	POS	POS	320	POS	NEG	160	POS	NEG	20	POS	NEG	4	2	8	3	64	6	0.5	-1	16	4	8	3	BP
El_Alto	3.2	NEG	NR	NEG	NEG	NR	NEG	NEG	NR	NEG	NEG	NR	NEG	NEG													NEG_ELISA
El_Alto	4176.8	POS	10240	POS	POS	10240	POS	POS	1280	POS	POS	640	POS	POS	1	0	8	3	16	4	0.125	-3	16	4	2	1	BP
El_Alto	834.37	POS	320	POS	NEG	640	POS	POS	80	POS	NEG	10	NEG	NEG	0.5	-1	4	2	32	5	0.125	-3	64	6	8	3	BR
El_Alto	427.69	POS	160	POS	NEG	640	POS	POS	40	POS	NEG	80	POS	NEG	0.25	-2	4	2	2	1	0.0625	-4	8	3	0.5	-1	BR
El_Alto	73.846	POS	10	NEG	NEG	10	NEG	NEG	10	NEG	NEG	10	NEG	NEG	1	0	1	0	1	0	1	0	1	0	1	0	NEG
El_Alto	340.54	POS	80	POS	NEG	40	POS	NEG	40	POS	NEG	10	NEG	NEG	2	1	2	1	8	3	1	0	4	2	4	2	BP
El_Alto	808.3	POS	640	POS	POS	2560	POS	POS	80	POS	NEG	80	POS	NEG	0.25	-2	8	3	8	3	0.03125	-5	32	5	1	0	BR
El_Alto	167.97	POS	40	POS	NEG	80	POS	NEG	80	POS	NEG	10	NEG	NEG	0.5	-1	0.5	-1	4	2	1	0	8	3	8	3	BR
El_Alto	1076.1	POS	640	POS	POS	10240	POS	POS	80	POS	NEG	80	POS	NEG	0.0625	-4	8	3	8	3	0.0078125	-7	128	7	1	0	BR
El_Alto	8.1401	NEG	NR	NEG	NEG	NR	NEG	NEG	NR	NEG	NEG	NR	NEG	NEG													NEG_ELISA
El_Alto	3.2	NEG	NR	NEG	NEG	NR	NEG	NEG	NR	NEG	NEG	NR	NEG	NEG													NEG_ELISA
El_Alto	299.46	POS	80	POS	NEG	320	POS	NEG	40	POS	NEG	10	NEG	NEG	0.25	-2	2	1	8	3	0.125	-3	32	5	4	2	BR
El_Alto	91.692	POS	20	POS	NEG	40	POS	NEG	40	POS	NEG	10	NEG	NEG	0.5	-1	0.5	-1	2	1	1	0	4	2	4	2	BR
El_Alto	3.08	NEG	NR	NEG	NEG	NR	NEG	NEG	NR	NEG	NEG	NR	NEG	NEG													NEG_ELISA
El_Alto	141.53	POS	80	POS	NEG	160	POS	NEG	80	POS	NEG	10	NEG	NEG	0.5	-1	1	0	8	3	0.5	-1	16	4	8	3	BR
El_Alto	366.74	POS	320	POS	NEG	640	POS	POS	40	POS	NEG	80	POS	NEG	0.5	-1	8	3	4	2	0.0625	-4	8	3	0.5	-1	BR
El_Alto	547.6	POS	1280	POS	POS	640	POS	POS	320	POS	NEG	20	POS	NEG	2	1	4	2	64	6	0.5	-1	32	5	16	4	BP
El_Alto	4059.5	POS	5120	POS	POS	10240	POS	POS	2560	POS	POS	80	POS	NEG	0.5	-1	2	1	64	6	0.25	-2	128	7	32	5	BR
El_Alto	112	POS	80	POS	NEG	40	POS	NEG	20	POS	NEG	20	POS	NEG	2	1	4	2	4	2	0.5	-1	2	1	1	0	BP
El_Alto	364.06	POS	10	NEG	NEG	10	NEG	NEG	10	NEG	NEG	10	NEG	NEG	1	0	1	0	1	0	1	0	1	0	1	0	NEG
El_Alto	348.87	POS	40	POS	NEG	160	POS	NEG	40	POS	NEG	10	NEG	NEG	0.25	-2	1	0	4	2	0.25	-2	16	4	4	2	BR
El_Alto	32.123	DOU	10	NEG	NEG	10	NEG	NEG	10	NEG	NEG	10	NEG	NEG	1	0	1	0	1	0	1	0	1	0	1	0	NEG
El_Alto	354.95	POS	320	POS	NEG	640	POS	POS	80	POS	NEG	40	POS	NEG	0.5	-1	4	2	8	3	0.125	-3	16	4	2	1	BR
El_Alto	666.07	POS	320	POS	NEG	1280	POS	POS	320	POS	NEG	320	POS	NEG	0.25	-2	1	0	1	0	0.25	-2	4	2	1	0	BR
El_Alto	582.99	POS	640	POS	POS	640	POS	POS	80	POS	NEG	160	POS	NEG	1	0	8	3	4	2	0.125	-3	4	2	0.5	-1	BP
El_Alto	332.8	POS	80	POS	NEG	320	POS	NEG	80	POS	NEG	10	NEG	NEG	0.25	-2	1	0	8	3	0.25	-2	32	5	8	3	BR
El_Alto	328.04	POS	80	POS	NEG	80	POS	NEG	40	POS	NEG	10	NEG	NEG	1	0	2	1	8	3	0.5	-1	8	3	4	2	BP
El_Alto	171.61	POS	80	POS	NEG	160	POS	NEG	40	POS	NEG	10	NEG	NEG	0.5	-1	2	1	8	3	0.25	-2	16	4	4	2	BR
El_Alto	338.75	POS	80	POS	NEG	80	POS	NEG	160	POS	NEG	10	NEG	NEG	1	0	0.5	-1	8	3	2	1	8	3	16	4	IN
El_Alto	8918.5	POS	10240	POS	POS	5120	POS	POS	5120	POS	POS	640	POS	POS	2	1	2	1	16	4	1	0	8	3	8	3	BP
El_Alto	1050.1	POS	160	POS	NEG	1280	POS	POS	320	POS	NEG	160	POS	NEG	0.125	-3	0.5	-1	1	0	0.25	-2	8	3	2	1	BR
El_Alto	38.253	POS	20	POS	NEG	10	NEG	NEG	20	POS	NEG	10	NEG	NEG	2	1	1	0	2	1	2	1	1	0	2	1	BP
El_Alto	173.02	POS	40	POS	NEG	160	POS	NEG	40	POS	NEG	10	NEG	NEG	0.25	-2	1	0	4	2	0.25	-2	16	4	4	2	BR
El_Alto	162.93	POS	40	POS	NEG	160	POS	NEG	160	POS	NEG	20	POS	NEG	0.25	-2	0.25	-2	2	1	1	0	8	3	8	3	BR
El_Alto	103.08	POS	40	POS	NEG	20	POS	NEG	20	POS	NEG	10	NEG	NEG	2	1	2	1	4	2	1	0	2	1	2	1	BP
El_Alto	31.895	DOU	20	POS	NEG	20	POS	NEG	40	POS	NEG	10	NEG	NEG	1	0	0.5	-1	2	1	2	1	2	1	4	2	IN
El_Alto	244.9	POS	80	POS	NEG	80	POS	NEG	40	POS	NEG	10	NEG	NEG	1	0	2	1	8	3	0.5	-1	8	3	4	2	BP
El_Alto	865.19	POS	1280	POS	POS	1280	POS	POS	320	POS	NEG	80	POS	NEG	1	0	4	2	16	4	0.25	-2	16	4	4	2	BP
El_Alto	39.724	POS	10	NEG	NEG	10	NEG	NEG	10	NEG	NEG	10	NEG	NEG	1	0	1	0	1	0	1	0	1	0	1	0	NEG
El_Alto	121.08	POS	20	POS	NEG	320	POS	NEG	20	POS	NEG	10	NEG	NEG	0.0625	-4	1	0	2	1	0.0625	-4	32	5	2	1	BR
El_Alto	642.37	POS	640	POS	POS	640	POS	POS	640	POS	POS	160	POS	NEG	1	0	1	0	4	2	1	0	4	2	4	2	BP
El_Alto	228.54	POS	320	POS	NEG	80	POS	NEG	320	POS	NEG	10	NEG	NEG	4	2	1	0	32	5	4	2	8	3	32	5	BP
El_Alto	3781.3	POS	2560	POS	POS	5120	POS	POS	640	POS	POS	160	POS	NEG	0.5	-1	4	2	16	4	0.125	-3	32	5	4	2	BR
El_Alto	1893.8	POS	640	POS	POS	1280	POS	POS	640	POS	POS	80	POS	NEG	0.5	-1	1	0	8	3	0.5	-1	16	4	8	3	BR
El_Alto	1437.3	POS	640	POS	POS	320	POS	NEG	640	POS	POS	40	POS	NEG	2	1	1	0	16	4	2	1	8	3	16	4	BP
El_Alto	228.95	POS	80	POS	NEG	320	POS	NEG	40	POS	NEG	20	POS	NEG	0.25	-2	2	1	4	2	0.125	-3	16	4	2	1	BR
El_Alto	6537.8	POS	640	POS	POS	2560	POS	POS	320	POS	NEG	640	POS	POS	0.25	-2	2	1	1	0	0.125	-3	4	2	0.5	-1	BR
El_Alto	543.67	POS	160	POS	NEG	2560	POS	POS	40	POS	NEG	20	POS	NEG	0.0625	-4	4	2	8	3	0.015625	-6	128	7	2	1	BR
El_Alto	537.77	POS	160	POS	NEG	640	POS	POS	320	POS	NEG	10	NEG	NEG	0.25	-2	0.5	-1	16	4	0.5	-1	64	6	32	5	BR
El_Alto	46.713	POS	80	POS	NEG	10	NEG	NEG	10	NEG	NEG	10	NEG	NEG	8	3	8	3	8	3	1	0	1	0	1	0	BP
El_Alto	56.889	POS	10	NEG	NEG	10	NEG	NEG	10	NEG	NEG	10	NEG	NEG	1	0	1	0	1	0	1	0	1	0	1	0	NEG
El_Alto	451.28	POS	640	POS	POS	320	POS	NEG	80	POS	NEG	160	POS	NEG	2	1	8	3	4	2	0.25	-2	2	1	0.5	-1	BP
El_Alto	53.946	POS	20	POS	NEG	40	POS	NEG	10	NEG	NEG	10	NEG	NEG	0.5	-1	2	1	2	1	0.25	-2	4	2	1	0	BR
El_Alto	6245	POS	20480	POS	POS	5120	POS	POS	2560	POS	POS	640	POS	POS	4	2	8	3	32	5	0.5	-1	8	3	4	2	BP
El_Alto	60.812	POS	10	NEG	NEG	10	NEG	NEG	10	NEG	NEG	10	NEG	NEG	1	0	1	0	1	0	1	0	1	0	1	0	NEG
El_Alto	201.29	POS	40	POS	NEG	160	POS	NEG	80	POS	NEG	10	NEG	NEG	0.25	-2	0.5	-1	4	2	0.5	-1	16	4	8	3	BR
El_Alto	82	POS	80	POS	NEG	320	POS	NEG	80	POS	NEG	20	POS	NEG	0.25	-2	1	0	4	2	0.25	-2	16	4	4	2	BR
El_Alto	500.42	POS	320	POS	NEG	320	POS	NEG	80	POS	NEG	160	POS	NEG	1	0	4	2	2	1	0.25	-2	2	1	0.5	-1	BP
El_Alto	4585.4	POS	1280	POS	POS	5120	POS	POS	1280	POS	POS	640	POS	POS	0.25	-2	1	0	2	1	0.25	-2	8	3	2	1	BR
El_Alto	113.54	POS	40	POS	NEG	80	POS	NEG	80	POS	NEG	10	NEG	NEG	0.5	-1	0.5	-1	4	2	1	0	8	3	8	3	BR
El_Alto	339.65	POS	40	POS	NEG	320	POS	NEG	160	POS	NEG	20	POS	NEG	0.125	-3	0.25	-2	2	1	0.5	-1	16	4	8	3	BR
El_Alto	117.85	POS	80	POS	NEG	40	POS	NEG	20	POS	NEG	10	NEG	NEG	2	1	4	2	8	3	0.5	-1	4	2	2	1	BP
El_Alto	865.19	POS	1280	POS	POS	640	POS	POS	160	POS	NEG	40	POS	NEG	2	1	8	3	32	5	0.25	-2	16	4	4	2	BP
El_Alto	158.28	POS	40	POS	NEG	10	NEG	NEG	20	POS	NEG	10	NEG	NEG	4	2	2	1	4	2	2	1	1	0	2	1	BP
El_Alto	374.61	POS	160	POS	NEG	640	POS	POS	20	POS	NEG	10	NEG	NEG	0.25	-2	8	3	16	4	0.03125	-5	64	6	2	1	BR
El_Alto	35.188	DOU	10	NEG	NEG	10	NEG	NEG	10	NEG	NEG	10	NEG	NEG	1	0	1	0	1	0	1	0	1	0	1	0	NEG
El_Alto	338.46	POS	80	POS	NEG	160	POS	NEG	80	POS	NEG	10	NEG	NEG	0.5	-1	1	0	8	3	0.5	-1	16	4	8	3	BR
El_Alto	398.2	POS	320	POS	NEG	160	POS	NEG	40	POS	NEG	160	POS	NEG	2	1	8	3	2	1	0.25	-2	1	0	0.25	-2	BP
El_Alto	4337.7	POS	5120	POS	POS	20480	POS	POS	640	POS	POS	640	POS	POS	0.25	-2	8	3	8	3	0.03125	-5	32	5	1	0	BR
El_Alto	319.11	POS	80	POS	NEG	80	POS	NEG	10	NEG	NEG	10	NEG	NEG	1	0	8	3	8	3	0.125	-3	8	3	1	0	BP
El_Alto	80.923	POS	40	POS	NEG	80	POS	NEG	10	NEG	NEG	10	NEG	NEG	0.5	-1	4	2	4	2	0.125	-3	8	3	1	0	BR
El_Alto	239.44	POS	80	POS	NEG	320	POS	NEG	160	POS	NEG	10	NEG	NEG	0.25	-2	0.5	-1	8	3	0.5	-1	32	5	16	4	BR
El_Alto	240.45	POS	160	POS	NEG	160	POS	NEG	80	POS	NEG	10	NEG	NEG	1	0	2	1	16	4	0.5	-1	16	4	8	3	BP
El_Alto	2331.8	POS	1280	POS	POS	1280	POS	POS	320	POS	NEG	320	POS	NEG	1	0	4	2	4	2	0.25	-2	4	2	1	0	BP
El_Alto	95.077	POS	20	POS	NEG	20	POS	NEG	10	NEG	NEG	10	NEG	NEG	1	0	2	1	2	1	0.5	-1	2	1	1	0	BP
El_Alto	3.05	NEG	NR	NEG	NEG	NR	NEG	NEG	NR	NEG	NEG	NR	NEG	NEG													NEG_ELISA
El_Alto	321.53	POS	80	POS	NEG	160	POS	NEG	10	NEG	NEG	10	NEG	NEG	0.5	-1	8	3	8	3	0.0625	-4	16	4	1	0	BR
El_Alto	5986.7	POS	2560	POS	POS	2560	POS	POS	2560	POS	POS	160	POS	NEG	1	0	1	0	16	4	1	0	16	4	16	4	BP
El_Alto	1708.7	POS	2560	POS	POS	1280	POS	POS	320	POS	NEG	160	POS	NEG	2	1	8	3	16	4	0.25	-2	8	3	2	1	BP
El_Alto	169.53	POS	160	POS	NEG	80	POS	NEG	80	POS	NEG	10	NEG	NEG	2	1	2	1	16	4	1	0	8	3	8	3	BP
El_Alto	170.13	POS	20	POS	NEG	160	POS	NEG	40	POS	NEG	10	NEG	NEG	0.125	-3	0.5	-1	2	1	0.25	-2	16	4	4	2	BR
El_Alto	292.86	POS	160	POS	NEG	160	POS	NEG	320	POS	NEG	10	NEG	NEG	1	0	0.5	-1	16	4	2	1	16	4	32	5	IN
El_Alto	3637.9	POS	2560	POS	POS	2560	POS	POS	640	POS	POS	320	POS	NEG	1	0	4	2	8	3	0.25	-2	8	3	2	1	BP
El_Alto	160.1	POS	40	POS	NEG	20	POS	NEG	40	POS	NEG	10	NEG	NEG	2	1	1	0	4	2	2	1	2	1	4	2	BP
El_Alto	1002.7	POS	5120	POS	POS	2560	POS	POS	1280	POS	POS	80	POS	NEG	2	1	4	2	64	6	0.5	-1	32	5	16	4	BP
El_Alto	162.31	POS	80	POS	NEG	80	POS	NEG	80	POS	NEG	10	NEG	NEG	1	0	1	0	8	3	1	0	8	3	8	3	BP
El_Alto	104.45	POS	80	POS	NEG	40	POS	NEG	40	POS	NEG	10	NEG	NEG	2	1	2	1	8	3	1	0	4	2	4	2	BP
El_Alto	3.3973	NEG	NR	NEG	NEG	NR	NEG	NEG	NR	NEG	NEG	NR	NEG	NEG													NEG_ELISA
El_Alto	88.453	POS	10	NEG	NEG	10	NEG	NEG	10	NEG	NEG	10	NEG	NEG	1	0	1	0	1	0	1	0	1	0	1	0	NEG
El_Alto	147.26	POS	40	POS	NEG	80	POS	NEG	160	POS	NEG	10	NEG	NEG	0.5	-1	0.25	-2	4	2	2	1	8	3	16	4	IN
El_Alto	3272.8	POS	2560	POS	POS	20480	POS	POS	320	POS	NEG	640	POS	POS	0.125	-3	8	3	4	2	0.015625	-6	32	5	0.5	-1	BR
El_Alto	64.755	POS	40	POS	NEG	80	POS	NEG	40	POS	NEG	10	NEG	NEG	0.5	-1	1	0	4	2	0.5	-1	8	3	4	2	BR
El_Alto	5.074	NEG	NR	NEG	NEG	NR	NEG	NEG	NR	NEG	NEG	NR	NEG	NEG													NEG_ELISA
El_Alto	11911	POS	10240	POS	POS	10240	POS	POS	10240	POS	POS	640	POS	POS	1	0	1	0	16	4	1	0	16	4	16	4	BP
El_Alto	4685.4	POS	5120	POS	POS	2560	POS	POS	2560	POS	POS	640	POS	POS	2	1	2	1	8	3	1	0	4	2	4	2	BP
El_Alto	188.79	POS	80	POS	NEG	320	POS	NEG	160	POS	NEG	10	NEG	NEG	0.25	-2	0.5	-1	8	3	0.5	-1	32	5	16	4	BR
El_Alto	732.44	POS	2560	POS	POS	2560	POS	POS	640	POS	POS	320	POS	NEG	1	0	4	2	8	3	0.25	-2	8	3	2	1	BP
El_Alto	5998.2	POS	5120	POS	POS	10240	POS	POS	1280	POS	POS	640	POS	POS	0.5	-1	4	2	8	3	0.125	-3	16	4	2	1	BR
El_Alto	433.58	POS	80	POS	NEG	640	POS	POS	20	POS	NEG	20	POS	NEG	0.125	-3	4	2	4	2	0.03125	-5	32	5	1	0	BR
El_Alto	135.02	POS	160	POS	NEG	320	POS	NEG	320	POS	NEG	10	NEG	NEG	0.5	-1	0.5	-1	16	4	1	0	32	5	32	5	BR
El_Alto	312.66	POS	80	POS	NEG	320	POS	NEG	160	POS	NEG	20	POS	NEG	0.25	-2	0.5	-1	4	2	0.5	-1	16	4	8	3	BR
El_Alto	3.1	NEG	NR	NEG	NEG	NR	NEG	NEG	NR	NEG	NEG	NR	NEG	NEG													NEG_ELISA
El_Alto	51.2	POS	10	NEG	NEG	10	NEG	NEG	10	NEG	NEG	10	NEG	NEG	1	0	1	0	1	0	1	0	1	0	1	0	NEG
El_Alto	443.41	POS	640	POS	POS	320	POS	NEG	160	POS	NEG	80	POS	NEG	2	1	4	2	8	3	0.5	-1	4	2	2	1	BP
El_Alto	3.08	NEG	NR	NEG	NEG	NR	NEG	NEG	NR	NEG	NEG	NR	NEG	NEG													NEG_ELISA
El_Alto	6026.9	POS	10240	POS	POS	10240	POS	POS	1280	POS	POS	640	POS	POS	1	0	8	3	16	4	0.125	-3	16	4	2	1	BP
El_Alto	86.792	POS	20	POS	NEG	40	POS	NEG	40	POS	NEG	10	NEG	NEG	0.5	-1	0.5	-1	2	1	1	0	4	2	4	2	BR
El_Alto	215.07	POS	80	POS	NEG	40	POS	NEG	40	POS	NEG	10	NEG	NEG	2	1	2	1	8	3	1	0	4	2	4	2	BP
El_Alto	2264.2	POS	2560	POS	POS	2560	POS	POS	640	POS	POS	160	POS	NEG	1	0	4	2	16	4	0.25	-2	16	4	4	2	BP
El_Alto	134.82	POS	40	POS	NEG	20	POS	NEG	40	POS	NEG	10	NEG	NEG	2	1	1	0	4	2	2	1	2	1	4	2	BP
El_Alto	7777.8	POS	5120	POS	POS	2560	POS	POS	2560	POS	POS	640	POS	POS	2	1	2	1	8	3	1	0	4	2	4	2	BP
El_Alto	137.83	POS	80	POS	NEG	80	POS	NEG	80	POS	NEG	10	NEG	NEG	1	0	1	0	8	3	1	0	8	3	8	3	BP
El_Alto	2885	POS	640	POS	POS	5120	POS	POS	80	POS	NEG	10	NEG	NEG	0.125	-3	8	3	64	6	0.015625	-6	512	9	8	3	BR
El_Alto	2374.8	POS	2560	POS	POS	10240	POS	POS	320	POS	NEG	320	POS	NEG	0.25	-2	8	3	8	3	0.03125	-5	32	5	1	0	BR
El_Alto	892.5	POS	320	POS	NEG	1280	POS	POS	160	POS	NEG	20	POS	NEG	0.25	-2	2	1	16	4	0.125	-3	64	6	8	3	BR
El_Alto	362.84	POS	80	POS	NEG	320	POS	NEG	80	POS	NEG	10	NEG	NEG	0.25	-2	1	0	8	3	0.25	-2	32	5	8	3	BR
El_Alto	6988.6	POS	2560	POS	POS	5120	POS	POS	640	POS	POS	320	POS	NEG	0.5	-1	4	2	8	3	0.125	-3	16	4	2	1	BR
El_Alto	107.02	POS	40	POS	NEG	80	POS	NEG	160	POS	NEG	10	NEG	NEG	0.5	-1	0.25	-2	4	2	2	1	8	3	16	4	IN
El_Alto	97.962	POS	80	POS	NEG	40	POS	NEG	40	POS	NEG	10	NEG	NEG	2	1	2	1	8	3	1	0	4	2	4	2	BP
El_Alto	99.019	POS	80	POS	NEG	80	POS	NEG	40	POS	NEG	20	POS	NEG	1	0	2	1	4	2	0.5	-1	4	2	2	1	BP
El_Alto	233.13	POS	80	POS	NEG	80	POS	NEG	160	POS	NEG	10	NEG	NEG	1	0	0.5	-1	8	3	2	1	8	3	16	4	IN
El_Alto	180.56	POS	160	POS	NEG	80	POS	NEG	80	POS	NEG	10	NEG	NEG	2	1	2	1	16	4	1	0	8	3	8	3	BP
El_Alto	563.5	POS	640	POS	POS	80	POS	NEG	80	POS	NEG	10	NEG	NEG	8	3	8	3	64	6	1	0	8	3	8	3	BP
El_Alto	104.75	POS	40	POS	NEG	160	POS	NEG	80	POS	NEG	20	POS	NEG	0.25	-2	0.5	-1	2	1	0.5	-1	8	3	4	2	BR
El_Alto	92.075	POS	80	POS	NEG	160	POS	NEG	40	POS	NEG	40	POS	NEG	0.5	-1	2	1	2	1	0.25	-2	4	2	1	0	BR
El_Alto	125.13	POS	20	POS	NEG	80	POS	NEG	40	POS	NEG	10	NEG	NEG	0.25	-2	0.5	-1	2	1	0.5	-1	8	3	4	2	BR
El_Alto	5107.5	POS	10240	POS	POS	2560	POS	POS	5120	POS	POS	320	POS	NEG	4	2	2	1	32	5	2	1	8	3	16	4	BP
El_Alto	42.585	POS	20	POS	NEG	10	NEG	NEG	10	NEG	NEG	10	NEG	NEG	2	1	2	1	2	1	1	0	1	0	1	0	BP
El_Alto	3.2	NEG	NR	NEG	NEG	NR	NEG	NEG	NR	NEG	NEG	NR	NEG	NEG													NEG_ELISA
El_Alto	2579.8	POS	5120	POS	POS	1280	POS	POS	640	POS	POS	640	POS	POS	4	2	8	3	8	3	0.5	-1	2	1	1	0	BP
El_Alto	220.09	POS	80	POS	NEG	160	POS	NEG	40	POS	NEG	10	NEG	NEG	0.5	-1	2	1	8	3	0.25	-2	16	4	4	2	BR
El_Alto	150.07	POS	160	POS	NEG	320	POS	NEG	160	POS	NEG	80	POS	NEG	0.5	-1	1	0	2	1	0.5	-1	4	2	2	1	BR
El_Alto	42.462	POS	20	POS	NEG	80	POS	NEG	40	POS	NEG	10	NEG	NEG	0.25	-2	0.5	-1	2	1	0.5	-1	8	3	4	2	BR
El_Alto	4727.7	POS	5120	POS	POS	5120	POS	POS	640	POS	POS	640	POS	POS	1	0	8	3	8	3	0.125	-3	8	3	1	0	BP
El_Alto	117.89	POS	40	POS	NEG	160	POS	NEG	20	POS	NEG	10	NEG	NEG	0.25	-2	2	1	4	2	0.125	-3	16	4	2	1	BR
El_Alto	123.32	POS	80	POS	NEG	640	POS	POS	20	POS	NEG	10	NEG	NEG	0.125	-3	4	2	8	3	0.03125	-5	64	6	2	1	BR
El_Alto	215.47	POS	40	POS	NEG	80	POS	NEG	160	POS	NEG	10	NEG	NEG	0.5	-1	0.25	-2	4	2	2	1	8	3	16	4	IN
El_Alto	6330	POS	10240	POS	POS	5120	POS	POS	5120	POS	POS	160	POS	NEG	2	1	2	1	64	6	1	0	32	5	32	5	BP
El_Alto	1799.7	POS	1280	POS	POS	1280	POS	POS	1280	POS	POS	160	POS	NEG	1	0	1	0	8	3	1	0	8	3	8	3	BP
El_Alto	552.25	POS	640	POS	POS	80	POS	NEG	80	POS	NEG	40	POS	NEG	8	3	8	3	16	4	1	0	2	1	2	1	BP
El_Alto	12193	POS	5120	POS	POS	10240	POS	POS	2560	POS	POS	320	POS	NEG	0.5	-1	2	1	16	4	0.25	-2	32	5	8	3	BR
El_Alto	4283.8	POS	2560	POS	POS	640	POS	POS	640	POS	POS	640	POS	POS	4	2	4	2	4	2	1	0	1	0	1	0	BP
El_Alto	732.5	POS	320	POS	NEG	640	POS	POS	40	POS	NEG	80	POS	NEG	0.5	-1	8	3	4	2	0.0625	-4	8	3	0.5	-1	BR
El_Alto	523	POS	320	POS	NEG	160	POS	NEG	40	POS	NEG	10	NEG	NEG	2	1	8	3	32	5	0.25	-2	16	4	4	2	BP
El_Alto	1445.9	POS	320	POS	NEG	80	POS	NEG	160	POS	NEG	80	POS	NEG	4	2	2	1	4	2	2	1	1	0	2	1	BP
El_Alto	730	POS	160	POS	NEG	320	POS	NEG	320	POS	NEG	160	POS	NEG	0.5	-1	0.5	-1	1	0	1	0	2	1	2	1	BR
El_Alto	579.25	POS	320	POS	NEG	640	POS	POS	40	POS	NEG	40	POS	NEG	0.5	-1	8	3	8	3	0.0625	-4	16	4	1	0	BR
El_Alto	1448.6	POS	640	POS	POS	160	POS	NEG	80	POS	NEG	40	POS	NEG	4	2	8	3	16	4	0.5	-1	4	2	2	1	BP
El_Alto	307.88	POS	160	POS	NEG	80	POS	NEG	80	POS	NEG	10	NEG	NEG	2	1	2	1	16	4	1	0	8	3	8	3	BP
El_Alto	12.175	NEG	NR	NEG	NEG	NR	NEG	NEG	NR	NEG	NEG	NR	NEG	NEG													NEG_ELISA
El_Alto	4783.2	POS	320	POS	NEG	2560	POS	POS	160	POS	NEG	80	POS	NEG	0.125	-3	2	1	4	2	0.0625	-4	32	5	2	1	BR
El_Alto	377.17	POS	40	POS	NEG	80	POS	NEG	20	POS	NEG	10	NEG	NEG	0.5	-1	2	1	4	2	0.25	-2	8	3	2	1	BR
El_Alto	22.433	NEG	20	POS	NEG	10	NEG	NEG	10	NEG	NEG	10	NEG	NEG	2	1	2	1	2	1	1	0	1	0	1	0	NEG_ELISA
El_Alto	113.36	POS	10	NEG	NEG	20	POS	NEG	20	POS	NEG	10	NEG	NEG	0.5	-1	0.5	-1	1	0	1	0	2	1	2	1	BR
El_Alto	1067.5	POS	640	POS	POS	320	POS	NEG	320	POS	NEG	40	POS	NEG	2	1	2	1	16	4	1	0	8	3	8	3	BP
El_Alto	81.962	POS	80	POS	NEG	40	POS	NEG	40	POS	NEG	10	NEG	NEG	2	1	2	1	8	3	1	0	4	2	4	2	BP
El_Alto	360.45	POS	160	POS	NEG	320	POS	NEG	160	POS	NEG	80	POS	NEG	0.5	-1	1	0	2	1	0.5	-1	4	2	2	1	BR
El_Alto	5391.6	POS	1280	POS	POS	5120	POS	POS	640	POS	POS	320	POS	NEG	0.25	-2	2	1	4	2	0.125	-3	16	4	2	1	BR
El_Alto	3225.8	POS	10240	POS	POS	2560	POS	POS	1280	POS	POS	640	POS	POS	4	2	8	3	16	4	0.5	-1	4	2	2	1	BP
El_Alto	4414.6	POS	2560	POS	POS	10240	POS	POS	1280	POS	POS	640	POS	POS	0.25	-2	2	1	4	2	0.125	-3	16	4	2	1	BR
El_Alto	927.5	POS	1280	POS	POS	160	POS	NEG	320	POS	NEG	20	POS	NEG	8	3	4	2	64	6	2	1	8	3	16	4	BP
El_Alto	272.38	POS	40	POS	NEG	80	POS	NEG	80	POS	NEG	10	NEG	NEG	0.5	-1	0.5	-1	4	2	1	0	8	3	8	3	BR
El_Alto	755	POS	160	POS	NEG	2560	POS	POS	160	POS	NEG	80	POS	NEG	0.0625	-4	1	0	2	1	0.0625	-4	32	5	2	1	BR
El_Alto	870	POS	640	POS	POS	1280	POS	POS	160	POS	NEG	80	POS	NEG	0.5	-1	4	2	8	3	0.125	-3	16	4	2	1	BR
El_Alto	700	POS	640	POS	POS	160	POS	NEG	80	POS	NEG	80	POS	NEG	4	2	8	3	8	3	0.5	-1	2	1	1	0	BP
El_Alto	311.98	POS	20	POS	NEG	320	POS	NEG	10	NEG	NEG	10	NEG	NEG	0.0625	-4	2	1	2	1	0.03125	-5	32	5	1	0	BR
El_Alto	127.85	POS	20	POS	NEG	160	POS	NEG	80	POS	NEG	20	POS	NEG	0.125	-3	0.25	-2	1	0	0.5	-1	8	3	4	2	BR
El_Alto	22.466	NEG	10	NEG	NEG	10	NEG	NEG	10	NEG	NEG	10	NEG	NEG	1	0	1	0	1	0	1	0	1	0	1	0	NEG_ELISA
El_Alto	4311.6	POS	2560	POS	POS	1280	POS	POS	1280	POS	POS	160	POS	NEG	2	1	2	1	16	4	1	0	8	3	8	3	BP
El_Alto	3.9863	NEG	NR	NEG	NEG	NR	NEG	NEG	NR	NEG	NEG	NR	NEG	NEG													NEG_ELISA
El_Alto	188.1	POS	160	POS	NEG	80	POS	NEG	80	POS	NEG	10	NEG	NEG	2	1	2	1	16	4	1	0	8	3	8	3	BP
El_Alto	27.38	DOU	10	NEG	NEG	10	NEG	NEG	10	NEG	NEG	10	NEG	NEG	1	0	1	0	1	0	1	0	1	0	1	0	NEG
El_Alto	406	POS	320	POS	NEG	160	POS	NEG	80	POS	NEG	40	POS	NEG	2	1	4	2	8	3	0.5	-1	4	2	2	1	BP
El_Alto	89.446	POS	40	POS	NEG	80	POS	NEG	20	POS	NEG	10	NEG	NEG	0.5	-1	2	1	4	2	0.25	-2	8	3	2	1	BR
El_Alto	760	POS	160	POS	NEG	320	POS	NEG	160	POS	NEG	80	POS	NEG	0.5	-1	1	0	2	1	0.5	-1	4	2	2	1	BR
El_Alto	106.41	POS	40	POS	NEG	80	POS	NEG	80	POS	NEG	10	NEG	NEG	0.5	-1	0.5	-1	4	2	1	0	8	3	8	3	BR
El_Alto	127.23	POS	20	POS	NEG	80	POS	NEG	160	POS	NEG	10	NEG	NEG	0.25	-2	0.125	-3	2	1	2	1	8	3	16	4	IN
El_Alto	317.2	POS	160	POS	NEG	80	POS	NEG	160	POS	NEG	10	NEG	NEG	2	1	1	0	16	4	2	1	8	3	16	4	BP
El_Alto	122.91	POS	20	POS	NEG	80	POS	NEG	20	POS	NEG	10	NEG	NEG	0.25	-2	1	0	2	1	0.25	-2	8	3	2	1	BR
El_Alto	94.227	POS	20	POS	NEG	80	POS	NEG	40	POS	NEG	10	NEG	NEG	0.25	-2	0.5	-1	2	1	0.5	-1	8	3	4	2	BR
El_Alto	24.431	NEG	10	NEG	NEG	10	NEG	NEG	10	NEG	NEG	10	NEG	NEG	1	0	1	0	1	0	1	0	1	0	1	0	NEG_ELISA
El_Alto	1821.9	POS	2560	POS	POS	1280	POS	POS	1280	POS	POS	320	POS	NEG	2	1	2	1	8	3	1	0	4	2	4	2	BP
El_Alto	25.513	NEG	20	POS	NEG	10	NEG	NEG	10	NEG	NEG	10	NEG	NEG	2	1	2	1	2	1	1	0	1	0	1	0	NEG_ELISA
El_Alto	89.446	POS	20	POS	NEG	40	POS	NEG	20	POS	NEG	20	POS	NEG	0.5	-1	1	0	1	0	0.5	-1	2	1	1	0	BR
El_Alto	3947	POS	2560	POS	POS	2560	POS	POS	5120	POS	POS	320	POS	NEG	1	0	0.5	-1	8	3	2	1	8	3	16	4	IN
El_Alto	231.41	POS	40	POS	NEG	80	POS	NEG	20	POS	NEG	10	NEG	NEG	0.5	-1	2	1	4	2	0.25	-2	8	3	2	1	BR
El_Alto	592.75	POS	320	POS	NEG	320	POS	NEG	40	POS	NEG	20	POS	NEG	1	0	8	3	16	4	0.125	-3	16	4	2	1	BP
El_Alto	39.135	POS	20	POS	NEG	80	POS	NEG	10	NEG	NEG	10	NEG	NEG	0.25	-2	2	1	2	1	0.125	-3	8	3	1	0	BR
El_Alto	417.25	POS	160	POS	NEG	320	POS	NEG	80	POS	NEG	10	NEG	NEG	0.5	-1	2	1	16	4	0.25	-2	32	5	8	3	BR
El_Alto	84.357	POS	10	NEG	NEG	10	NEG	NEG	10	NEG	NEG	10	NEG	NEG	1	0	1	0	1	0	1	0	1	0	1	0	NEG
El_Alto	116.74	POS	40	POS	NEG	40	POS	NEG	10	NEG	NEG	10	NEG	NEG	1	0	4	2	4	2	0.25	-2	4	2	1	0	BP
El_Alto	2435.6	POS	1280	POS	POS	1280	POS	POS	320	POS	NEG	320	POS	NEG	1	0	4	2	4	2	0.25	-2	4	2	1	0	BP
El_Alto	7096.3	POS	1280	POS	POS	10240	POS	POS	320	POS	NEG	40	POS	NEG	0.125	-3	4	2	32	5	0.03125	-5	256	8	8	3	BR
El_Alto	93.61	POS	640	POS	POS	20	POS	NEG	80	POS	NEG	10	NEG	NEG	32	5	8	3	64	6	4	2	2	1	8	3	BP
El_Alto	22708	POS	10240	POS	POS	5120	POS	POS	5120	POS	POS	640	POS	POS	2	1	2	1	16	4	1	0	8	3	8	3	BP
El_Alto	599.5	POS	160	POS	NEG	320	POS	NEG	80	POS	NEG	40	POS	NEG	0.5	-1	2	1	4	2	0.25	-2	8	3	2	1	BR
El_Alto	100.24	POS	80	POS	NEG	20	POS	NEG	20	POS	NEG	10	NEG	NEG	4	2	4	2	8	3	1	0	2	1	2	1	BP
El_Alto	710	POS	80	POS	NEG	160	POS	NEG	40	POS	NEG	40	POS	NEG	0.5	-1	2	1	2	1	0.25	-2	4	2	1	0	BR
El_Alto	770	POS	640	POS	POS	1280	POS	POS	320	POS	NEG	160	POS	NEG	0.5	-1	2	1	4	2	0.25	-2	8	3	2	1	BR
El_Alto	3202	POS	5120	POS	POS	1280	POS	POS	1280	POS	POS	640	POS	POS	4	2	4	2	8	3	1	0	2	1	2	1	BP
El_Alto	15.88	NEG	NR	NEG	NEG	NR	NEG	NEG	NR	NEG	NEG	NR	NEG	NEG													NEG_ELISA
El_Alto	15.29	NEG	NR	NEG	NEG	NR	NEG	NEG	NR	NEG	NEG	NR	NEG	NEG													NEG_ELISA
El_Alto	1940.7	POS	2560	POS	POS	5120	POS	POS	1280	POS	POS	40	POS	NEG	0.5	-1	2	1	64	6	0.25	-2	128	7	32	5	BR
El_Alto	9.2942	NEG	NR	NEG	NEG	NR	NEG	NEG	NR	NEG	NEG	NR	NEG	NEG													NEG_ELISA
El_Alto	4866.4	POS	1280	POS	POS	1280	POS	POS	2560	POS	POS	640	POS	POS	1	0	0.5	-1	2	1	2	1	2	1	4	2	IN
El_Alto	1304.9	POS	1280	POS	POS	640	POS	POS	320	POS	NEG	160	POS	NEG	2	1	4	2	8	3	0.5	-1	4	2	2	1	BP
El_Alto	383.5	POS	160	POS	NEG	160	POS	NEG	80	POS	NEG	40	POS	NEG	1	0	2	1	4	2	0.5	-1	4	2	2	1	BP
El_Alto	258.45	POS	640	POS	POS	40	POS	NEG	80	POS	NEG	10	NEG	NEG	16	4	8	3	64	6	2	1	4	2	8	3	BP
El_Alto	354.97	POS	40	POS	NEG	20	POS	NEG	20	POS	NEG	10	NEG	NEG	2	1	2	1	4	2	1	0	2	1	2	1	BP
El_Alto	1559.2	POS	1280	POS	POS	2560	POS	POS	1280	POS	POS	320	POS	NEG	0.5	-1	1	0	4	2	0.5	-1	8	3	4	2	BR
El_Alto	150.44	POS	80	POS	NEG	40	POS	NEG	20	POS	NEG	10	NEG	NEG	2	1	4	2	8	3	0.5	-1	4	2	2	1	BP
El_Alto	4751.5	POS	2560	POS	POS	2560	POS	POS	2560	POS	POS	640	POS	POS	1	0	1	0	4	2	1	0	4	2	4	2	BP
El_Alto	377.36	POS	40	POS	NEG	80	POS	NEG	80	POS	NEG	10	NEG	NEG	0.5	-1	0.5	-1	4	2	1	0	8	3	8	3	BR
El_Alto	1421	POS	1280	POS	POS	1280	POS	POS	320	POS	NEG	80	POS	NEG	1	0	4	2	16	4	0.25	-2	16	4	4	2	BP
El_Alto	3.02	NEG	NR	NEG	NEG	NR	NEG	NEG	NR	NEG	NEG	NR	NEG	NEG													NEG_ELISA
El_Alto	1032.5	POS	320	POS	NEG	320	POS	NEG	40	POS	NEG	20	POS	NEG	1	0	8	3	16	4	0.125	-3	16	4	2	1	BP
El_Alto	262.99	POS	40	POS	NEG	320	POS	NEG	160	POS	NEG	20	POS	NEG	0.125	-3	0.25	-2	2	1	0.5	-1	16	4	8	3	BR
El_Alto	802.5	POS	1280	POS	POS	320	POS	NEG	320	POS	NEG	40	POS	NEG	4	2	4	2	32	5	1	0	8	3	8	3	BP
El_Alto	5144.7	POS	2560	POS	POS	2560	POS	POS	2560	POS	POS	160	POS	NEG	1	0	1	0	16	4	1	0	16	4	16	4	BP
El_Alto	388	POS	320	POS	NEG	160	POS	NEG	80	POS	NEG	20	POS	NEG	2	1	4	2	16	4	0.5	-1	8	3	4	2	BP
El_Alto	16.47	NEG	NR	NEG	NEG	NR	NEG	NEG	NR	NEG	NEG	NR	NEG	NEG													NEG_ELISA
El_Alto	1650.5	POS	2560	POS	POS	1280	POS	POS	640	POS	POS	160	POS	NEG	2	1	4	2	16	4	0.5	-1	8	3	4	2	BP
El_Alto	2272.5	POS	320	POS	NEG	320	POS	NEG	160	POS	NEG	160	POS	NEG	1	0	2	1	2	1	0.5	-1	2	1	1	0	BP
El_Alto	3725.1	POS	2560	POS	POS	2560	POS	POS	2560	POS	POS	640	POS	POS	1	0	1	0	4	2	1	0	4	2	4	2	BP
El_Alto	2557.2	POS	2560	POS	POS	2560	POS	POS	320	POS	NEG	640	POS	POS	1	0	8	3	4	2	0.125	-3	4	2	0.5	-1	BP
El_Alto	3990.6	POS	5120	POS	POS	10240	POS	POS	1280	POS	POS	640	POS	POS	0.5	-1	4	2	8	3	0.125	-3	16	4	2	1	BR
El_Alto	2184	POS	640	POS	POS	160	POS	NEG	320	POS	NEG	80	POS	NEG	4	2	2	1	8	3	2	1	2	1	4	2	BP
El_Alto	1280	POS	640	POS	POS	2560	POS	POS	80	POS	NEG	80	POS	NEG	0.25	-2	8	3	8	3	0.03125	-5	32	5	1	0	BR
El_Alto	8800	POS	20480	POS	POS	10240	POS	POS	5120	POS	POS	320	POS	NEG	2	1	4	2	64	6	0.5	-1	32	5	16	4	BP
El_Alto	30.722	DOU	40	POS	NEG	80	POS	NEG	40	POS	NEG	10	NEG	NEG	0.5	-1	1	0	4	2	0.5	-1	8	3	4	2	BR
El_Alto	3.04	NEG	NR	NEG	NEG	NR	NEG	NEG	NR	NEG	NEG	NR	NEG	NEG													NEG_ELISA
El_Alto	185.37	POS	10	NEG	NEG	10	NEG	NEG	20	POS	NEG	10	NEG	NEG	1	0	0.5	-1	1	0	2	1	1	0	2	1	IN
El_Alto	253.66	POS	20	POS	NEG	20	POS	NEG	40	POS	NEG	10	NEG	NEG	1	0	0.5	-1	2	1	2	1	2	1	4	2	IN
El_Alto	1020	POS	160	POS	NEG	2560	POS	POS	160	POS	NEG	160	POS	NEG	0.0625	-4	1	0	1	0	0.0625	-4	16	4	1	0	BR
El_Alto	1172.5	POS	2560	POS	POS	320	POS	NEG	640	POS	POS	160	POS	NEG	8	3	4	2	16	4	2	1	2	1	4	2	BP
El_Alto	67.084	POS	20	POS	NEG	40	POS	NEG	20	POS	NEG	20	POS	NEG	0.5	-1	1	0	1	0	0.5	-1	2	1	1	0	BR
El_Alto	120.91	POS	40	POS	NEG	20	POS	NEG	10	NEG	NEG	10	NEG	NEG	2	1	4	2	4	2	0.5	-1	2	1	1	0	BP
El_Alto	188.88	POS	20	POS	NEG	160	POS	NEG	80	POS	NEG	10	NEG	NEG	0.125	-3	0.25	-2	2	1	0.5	-1	16	4	8	3	BR
El_Alto	10948	POS	5120	POS	POS	10240	POS	POS	640	POS	POS	320	POS	NEG	0.5	-1	8	3	16	4	0.0625	-4	32	5	2	1	BR
El_Alto	527.5	POS	320	POS	NEG	160	POS	NEG	80	POS	NEG	40	POS	NEG	2	1	4	2	8	3	0.5	-1	4	2	2	1	BP
El_Alto	232.98	POS	20	POS	NEG	640	POS	POS	10	NEG	NEG	10	NEG	NEG	0.03125	-5	2	1	2	1	0.015625	-6	64	6	1	0	BR
El_Alto	1454.2	POS	640	POS	POS	160	POS	NEG	640	POS	POS	80	POS	NEG	4	2	1	0	8	3	4	2	2	1	8	3	BP
El_Alto	2554.5	POS	2560	POS	POS	320	POS	NEG	1280	POS	POS	80	POS	NEG	8	3	2	1	32	5	4	2	4	2	16	4	BP
El_Alto	692.5	POS	320	POS	NEG	640	POS	POS	160	POS	NEG	160	POS	NEG	0.5	-1	2	1	2	1	0.25	-2	4	2	1	0	BR
El_Alto	4406.7	POS	1280	POS	POS	2560	POS	POS	1280	POS	POS	320	POS	NEG	0.5	-1	1	0	4	2	0.5	-1	8	3	4	2	BR
El_Alto	457.75	POS	80	POS	NEG	320	POS	NEG	40	POS	NEG	40	POS	NEG	0.25	-2	2	1	2	1	0.125	-3	8	3	1	0	BR
El_Alto	3.02	NEG	NR	NEG	NEG	NR	NEG	NEG	NR	NEG	NEG	NR	NEG	NEG													NEG_ELISA
El_Alto	5515.1	POS	10240	POS	POS	1280	POS	POS	2560	POS	POS	640	POS	POS	8	3	4	2	16	4	2	1	2	1	4	2	BP
El_Alto	2746.3	POS	5120	POS	POS	2560	POS	POS	640	POS	POS	320	POS	NEG	2	1	8	3	16	4	0.25	-2	8	3	2	1	BP
El_Alto	271	POS	80	POS	NEG	320	POS	NEG	40	POS	NEG	40	POS	NEG	0.25	-2	2	1	2	1	0.125	-3	8	3	1	0	BR
El_Alto	194.15	POS	80	POS	NEG	160	POS	NEG	20	POS	NEG	10	NEG	NEG	0.5	-1	4	2	8	3	0.125	-3	16	4	2	1	BR
El_Alto	62.703	POS	10	NEG	NEG	10	NEG	NEG	20	POS	NEG	10	NEG	NEG	1	0	0.5	-1	1	0	2	1	1	0	2	1	IN
El_Alto	222.63	POS	40	POS	NEG	80	POS	NEG	10	NEG	NEG	10	NEG	NEG	0.5	-1	4	2	4	2	0.125	-3	8	3	1	0	BR
El_Alto	419.5	POS	320	POS	NEG	640	POS	POS	160	POS	NEG	80	POS	NEG	0.5	-1	2	1	4	2	0.25	-2	8	3	2	1	BR
El_Alto	10.867	NEG	NR	NEG	NEG	NR	NEG	NEG	NR	NEG	NEG	NR	NEG	NEG													NEG_ELISA
El_Alto	4272	POS	640	POS	POS	2560	POS	POS	640	POS	POS	640	POS	POS	0.25	-2	1	0	1	0	0.25	-2	4	2	1	0	BR
El_Alto	1479	POS	2560	POS	POS	10240	POS	POS	640	POS	POS	640	POS	POS	0.25	-2	4	2	4	2	0.0625	-4	16	4	1	0	BR
El_Alto	4533.5	POS	5120	POS	POS	20480	POS	POS	2560	POS	POS	320	POS	NEG	0.25	-2	2	1	16	4	0.125	-3	64	6	8	3	BR
El_Alto	188.36	POS	160	POS	NEG	80	POS	NEG	80	POS	NEG	40	POS	NEG	2	1	2	1	4	2	1	0	2	1	2	1	BP
El_Alto	426.25	POS	40	POS	NEG	10	NEG	NEG	20	POS	NEG	10	NEG	NEG	4	2	2	1	4	2	2	1	1	0	2	1	BP
El_Alto	75.659	POS	20	POS	NEG	40	POS	NEG	80	POS	NEG	10	NEG	NEG	0.5	-1	0.25	-2	2	1	2	1	4	2	8	3	IN
El_Alto	258.27	POS	160	POS	NEG	640	POS	POS	80	POS	NEG	40	POS	NEG	0.25	-2	2	1	4	2	0.125	-3	16	4	2	1	BR
El_Alto	228.67	POS	160	POS	NEG	160	POS	NEG	320	POS	NEG	10	NEG	NEG	1	0	0.5	-1	16	4	2	1	16	4	32	5	IN
El_Alto	19099	POS	5120	POS	POS	5120	POS	POS	640	POS	POS	640	POS	POS	1	0	8	3	8	3	0.125	-3	8	3	1	0	BP
El_Alto	319.43	POS	40	POS	NEG	320	POS	NEG	160	POS	NEG	20	POS	NEG	0.125	-3	0.25	-2	2	1	0.5	-1	16	4	8	3	BR
El_Alto	63.368	POS	20	POS	NEG	160	POS	NEG	20	POS	NEG	10	NEG	NEG	0.125	-3	1	0	2	1	0.125	-3	16	4	2	1	BR
El_Alto	712.5	POS	320	POS	NEG	80	POS	NEG	320	POS	NEG	20	POS	NEG	4	2	1	0	16	4	4	2	4	2	16	4	BP
El_Alto	381.25	POS	320	POS	NEG	160	POS	NEG	40	POS	NEG	80	POS	NEG	2	1	8	3	4	2	0.25	-2	2	1	0.5	-1	BP
El_Alto	154.74	POS	40	POS	NEG	80	POS	NEG	160	POS	NEG	80	POS	NEG	0.5	-1	0.25	-2	0.5	-1	2	1	1	0	2	1	IN
El_Alto	345.2	POS	80	POS	NEG	160	POS	NEG	160	POS	NEG	10	NEG	NEG	0.5	-1	0.5	-1	8	3	1	0	16	4	16	4	BR
El_Alto	259.96	POS	40	POS	NEG	80	POS	NEG	80	POS	NEG	10	NEG	NEG	0.5	-1	0.5	-1	4	2	1	0	8	3	8	3	BR
El_Alto	353.42	POS	80	POS	NEG	1280	POS	POS	160	POS	NEG	10	NEG	NEG	0.0625	-4	0.5	-1	8	3	0.125	-3	128	7	16	4	BR
El_Alto	2225.5	POS	1280	POS	POS	1280	POS	POS	1280	POS	POS	640	POS	POS	1	0	1	0	2	1	1	0	2	1	2	1	BP
El_Alto	3.04	NEG	NR	NEG	NEG	NR	NEG	NEG	NR	NEG	NEG	NR	NEG	NEG													NEG_ELISA
El_Alto	69.576	POS	20	POS	NEG	80	POS	NEG	40	POS	NEG	20	POS	NEG	0.25	-2	0.5	-1	1	0	0.5	-1	4	2	2	1	BR
El_Alto	4.5395	NEG	NR	NEG	NEG	NR	NEG	NEG	NR	NEG	NEG	NR	NEG	NEG													NEG_ELISA
El_Alto	6297.1	POS	1280	POS	POS	2560	POS	POS	320	POS	NEG	160	POS	NEG	0.5	-1	4	2	8	3	0.125	-3	16	4	2	1	BR
El_Alto	1210	POS	1280	POS	POS	640	POS	POS	640	POS	POS	320	POS	NEG	2	1	2	1	4	2	1	0	2	1	2	1	BP
El_Alto	4941.7	POS	320	POS	NEG	5120	POS	POS	640	POS	POS	640	POS	POS	0.0625	-4	0.5	-1	0.5	-1	0.125	-3	8	3	1	0	BR
El_Alto	735	POS	80	POS	NEG	40	POS	NEG	20	POS	NEG	10	NEG	NEG	2	1	4	2	8	3	0.5	-1	4	2	2	1	BP
El_Alto	11.62	NEG	NR	NEG	NEG	NR	NEG	NEG	NR	NEG	NEG	NR	NEG	NEG													NEG_ELISA
El_Alto	115.33	POS	20	POS	NEG	20	POS	NEG	80	POS	NEG	10	NEG	NEG	1	0	0.25	-2	2	1	4	2	2	1	8	3	IN
El_Alto	89.6	POS	40	POS	NEG	20	POS	NEG	20	POS	NEG	10	NEG	NEG	2	1	2	1	4	2	1	0	2	1	2	1	BP
El_Alto	360.5	POS	80	POS	NEG	80	POS	NEG	160	POS	NEG	40	POS	NEG	1	0	0.5	-1	2	1	2	1	2	1	4	2	IN
El_Alto	4858.1	POS	2560	POS	POS	2560	POS	POS	2560	POS	POS	320	POS	NEG	1	0	1	0	8	3	1	0	8	3	8	3	BP
El_Alto	131.15	POS	40	POS	NEG	160	POS	NEG	20	POS	NEG	10	NEG	NEG	0.25	-2	2	1	4	2	0.125	-3	16	4	2	1	BR
El_Alto	70.717	POS	40	POS	NEG	40	POS	NEG	10	NEG	NEG	10	NEG	NEG	1	0	4	2	4	2	0.25	-2	4	2	1	0	BP
El_Alto	236.73	POS	160	POS	NEG	80	POS	NEG	20	POS	NEG	10	NEG	NEG	2	1	8	3	16	4	0.25	-2	8	3	2	1	BP
El_Alto	705.57	POS	160	POS	NEG	320	POS	NEG	160	POS	NEG	160	POS	NEG	0.5	-1	1	0	1	0	0.5	-1	2	1	1	0	BR
El_Alto	4003.1	POS	640	POS	POS	2560	POS	POS	2560	POS	POS	320	POS	NEG	0.25	-2	0.25	-2	2	1	1	0	8	3	8	3	BR
El_Alto	167.52	POS	20	POS	NEG	160	POS	NEG	20	POS	NEG	20	POS	NEG	0.125	-3	1	0	1	0	0.125	-3	8	3	1	0	BR
El_Alto	3908.4	POS	640	POS	POS	640	POS	POS	640	POS	POS	160	POS	NEG	1	0	1	0	4	2	1	0	4	2	4	2	BP
El_Alto	1106.9	POS	640	POS	POS	2560	POS	POS	640	POS	POS	320	POS	NEG	0.25	-2	1	0	2	1	0.25	-2	8	3	2	1	BR
El_Alto	7477.2	POS	10240	POS	POS	1280	POS	POS	2560	POS	POS	320	POS	NEG	8	3	4	2	32	5	2	1	4	2	8	3	BP
El_Alto	440.7	POS	640	POS	POS	640	POS	POS	160	POS	NEG	80	POS	NEG	1	0	4	2	8	3	0.25	-2	8	3	2	1	BP
El_Alto	1540.5	POS	1280	POS	POS	160	POS	NEG	640	POS	POS	40	POS	NEG	8	3	2	1	32	5	4	2	4	2	16	4	BP
El_Alto	2919.6	POS	640	POS	POS	320	POS	NEG	320	POS	NEG	80	POS	NEG	2	1	2	1	8	3	1	0	4	2	4	2	BP
El_Alto	4.2525	NEG	NR	NEG	NEG	NR	NEG	NEG	NR	NEG	NEG	NR	NEG	NEG													NEG_ELISA
El_Alto	259.4	POS	40	POS	NEG	80	POS	NEG	80	POS	NEG	10	NEG	NEG	0.5	-1	0.5	-1	4	2	1	0	8	3	8	3	BR
El_Alto	6.2618	NEG	NR	NEG	NEG	NR	NEG	NEG	NR	NEG	NEG	NR	NEG	NEG													NEG_ELISA
El_Alto	111.14	POS	20	POS	NEG	80	POS	NEG	80	POS	NEG	10	NEG	NEG	0.25	-2	0.25	-2	2	1	1	0	8	3	8	3	BR
El_Alto	74.646	POS	10	NEG	NEG	40	POS	NEG	40	POS	NEG	10	NEG	NEG	0.25	-2	0.25	-2	1	0	1	0	4	2	4	2	BR
El_Alto	57.158	POS	10	NEG	NEG	10	NEG	NEG	10	NEG	NEG	10	NEG	NEG	1	0	1	0	1	0	1	0	1	0	1	0	NEG
El_Alto	1028.2	POS	640	POS	POS	640	POS	POS	160	POS	NEG	80	POS	NEG	1	0	4	2	8	3	0.25	-2	8	3	2	1	BP
El_Alto	350.02	POS	80	POS	NEG	1280	POS	POS	320	POS	NEG	20	POS	NEG	0.0625	-4	0.25	-2	4	2	0.25	-2	64	6	16	4	BR
El_Alto	5272.1	POS	2560	POS	POS	10240	POS	POS	1280	POS	POS	160	POS	NEG	0.25	-2	2	1	16	4	0.125	-3	64	6	8	3	BR
El_Alto	188.17	POS	80	POS	NEG	80	POS	NEG	160	POS	NEG	10	NEG	NEG	1	0	0.5	-1	8	3	2	1	8	3	16	4	IN
El_Alto	392.52	POS	320	POS	NEG	80	POS	NEG	160	POS	NEG	20	POS	NEG	4	2	2	1	16	4	2	1	4	2	8	3	BP
El_Alto	92.135	POS	20	POS	NEG	10	NEG	NEG	10	NEG	NEG	10	NEG	NEG	2	1	2	1	2	1	1	0	1	0	1	0	BP
El_Alto	1669.3	POS	1280	POS	POS	320	POS	NEG	640	POS	POS	160	POS	NEG	4	2	2	1	8	3	2	1	2	1	4	2	BP
El_Alto	445.08	POS	1280	POS	POS	320	POS	NEG	160	POS	NEG	80	POS	NEG	4	2	8	3	16	4	0.5	-1	4	2	2	1	BP
El_Alto	108.48	POS	20	POS	NEG	20	POS	NEG	40	POS	NEG	10	NEG	NEG	1	0	0.5	-1	2	1	2	1	2	1	4	2	IN
El_Alto	32.211	DOU	10	NEG	NEG	10	NEG	NEG	10	NEG	NEG	10	NEG	NEG	1	0	1	0	1	0	1	0	1	0	1	0	NEG
El_Alto	17146	POS	10240	POS	POS	10240	POS	POS	1280	POS	POS	160	POS	NEG	1	0	8	3	64	6	0.125	-3	64	6	8	3	BP
El_Alto	6495	POS	2560	POS	POS	10240	POS	POS	1280	POS	POS	80	POS	NEG	0.25	-2	2	1	32	5	0.125	-3	128	7	16	4	BR
El_Alto	357.66	POS	80	POS	NEG	160	POS	NEG	80	POS	NEG	20	POS	NEG	0.5	-1	1	0	4	2	0.5	-1	8	3	4	2	BR
El_Alto	3.03	NEG	NR	NEG	NEG	NR	NEG	NEG	NR	NEG	NEG	NR	NEG	NEG													NEG_ELISA
El_Alto	12.959	NEG	NR	NEG	NEG	NR	NEG	NEG	NR	NEG	NEG	NR	NEG	NEG													NEG_ELISA
El_Alto	6381	POS	10240	POS	POS	5120	POS	POS	2560	POS	POS	640	POS	POS	2	1	4	2	16	4	0.5	-1	8	3	4	2	BP
El_Alto	3.16	NEG	NR	NEG	NEG	NR	NEG	NEG	NR	NEG	NEG	NR	NEG	NEG													NEG_ELISA
El_Alto	3.04	NEG	NR	NEG	NEG	NR	NEG	NEG	NR	NEG	NEG	NR	NEG	NEG													NEG_ELISA
El_Alto	161.43	POS	40	POS	NEG	40	POS	NEG	80	POS	NEG	10	NEG	NEG	1	0	0.5	-1	4	2	2	1	4	2	8	3	IN
El_Alto	311.22	POS	40	POS	NEG	320	POS	NEG	320	POS	NEG	20	POS	NEG	0.125	-3	0.125	-3	2	1	1	0	16	4	16	4	BR
El_Alto	229.57	POS	20	POS	NEG	40	POS	NEG	20	POS	NEG	10	NEG	NEG	0.5	-1	1	0	2	1	0.5	-1	4	2	2	1	BR
El_Alto	242.39	POS	40	POS	NEG	20	POS	NEG	20	POS	NEG	10	NEG	NEG	2	1	2	1	4	2	1	0	2	1	2	1	BP
El_Alto	344	POS	160	POS	NEG	80	POS	NEG	80	POS	NEG	10	NEG	NEG	2	1	2	1	16	4	1	0	8	3	8	3	BP
El_Alto	240.81	POS	20	POS	NEG	80	POS	NEG	20	POS	NEG	20	POS	NEG	0.25	-2	1	0	1	0	0.25	-2	4	2	1	0	BR
El_Alto	4750.6	POS	5120	POS	POS	5120	POS	POS	1280	POS	POS	640	POS	POS	1	0	4	2	8	3	0.25	-2	8	3	2	1	BP
El_Alto	6.9457	NEG	NR	NEG	NEG	NR	NEG	NEG	NR	NEG	NEG	NR	NEG	NEG													NEG_ELISA
El_Alto	59.822	POS	20	POS	NEG	40	POS	NEG	40	POS	NEG	10	NEG	NEG	0.5	-1	0.5	-1	2	1	1	0	4	2	4	2	BR
El_Alto	1171	POS	320	POS	NEG	320	POS	NEG	80	POS	NEG	40	POS	NEG	1	0	4	2	8	3	0.25	-2	8	3	2	1	BP
El_Alto	15.852	NEG	NR	NEG	NEG	NR	NEG	NEG	NR	NEG	NEG	NR	NEG	NEG													NEG_ELISA
El_Alto	248.7	POS	20	POS	NEG	80	POS	NEG	10	NEG	NEG	10	NEG	NEG	0.25	-2	2	1	2	1	0.125	-3	8	3	1	0	BR
El_Alto	12974	POS	5120	POS	POS	2560	POS	POS	1280	POS	POS	640	POS	POS	2	1	4	2	8	3	0.5	-1	4	2	2	1	BP
El_Alto	173.36	POS	40	POS	NEG	320	POS	NEG	40	POS	NEG	10	NEG	NEG	0.125	-3	1	0	4	2	0.125	-3	32	5	4	2	BR
El_Alto	194.66	POS	10	NEG	NEG	10	NEG	NEG	10	NEG	NEG	10	NEG	NEG	1	0	1	0	1	0	1	0	1	0	1	0	NEG
El_Alto	235.88	POS	80	POS	NEG	640	POS	POS	160	POS	NEG	80	POS	NEG	0.125	-3	0.5	-1	1	0	0.25	-2	8	3	2	1	BR
El_Alto	1097.5	POS	320	POS	NEG	1280	POS	POS	160	POS	NEG	160	POS	NEG	0.25	-2	2	1	2	1	0.125	-3	8	3	1	0	BR
El_Alto	164.88	POS	40	POS	NEG	160	POS	NEG	40	POS	NEG	10	NEG	NEG	0.25	-2	1	0	4	2	0.25	-2	16	4	4	2	BR
El_Alto	1263.4	POS	640	POS	POS	1280	POS	POS	320	POS	NEG	320	POS	NEG	0.5	-1	2	1	2	1	0.25	-2	4	2	1	0	BR
El_Alto	3.6162	NEG	NR	NEG	NEG	NR	NEG	NEG	NR	NEG	NEG	NR	NEG	NEG													NEG_ELISA
El_Alto	6118.7	POS	5120	POS	POS	5120	POS	POS	5120	POS	POS	640	POS	POS	1	0	1	0	8	3	1	0	8	3	8	3	BP
El_Alto	301	POS	80	POS	NEG	160	POS	NEG	160	POS	NEG	10	NEG	NEG	0.5	-1	0.5	-1	8	3	1	0	16	4	16	4	BR
El_Alto	35.771	POS	10	NEG	NEG	10	NEG	NEG	10	NEG	NEG	10	NEG	NEG	1	0	1	0	1	0	1	0	1	0	1	0	NEG
El_Alto	6331.1	POS	5120	POS	POS	5120	POS	POS	640	POS	POS	160	POS	NEG	1	0	8	3	32	5	0.125	-3	32	5	4	2	BP
El_Alto	559.4	POS	320	POS	NEG	80	POS	NEG	80	POS	NEG	10	NEG	NEG	4	2	4	2	32	5	1	0	8	3	8	3	BP
El_Alto	3.02	NEG	NR	NEG	NEG	NR	NEG	NEG	NR	NEG	NEG	NR	NEG	NEG													NEG_ELISA
El_Alto	294.25	POS	320	POS	NEG	160	POS	NEG	160	POS	NEG	40	POS	NEG	2	1	2	1	8	3	1	0	4	2	4	2	BP
El_Alto	4463.7	POS	10240	POS	POS	10240	POS	POS	1280	POS	POS	160	POS	NEG	1	0	8	3	64	6	0.125	-3	64	6	8	3	BP
El_Alto	862.81	POS	640	POS	POS	1280	POS	POS	160	POS	NEG	320	POS	NEG	0.5	-1	4	2	2	1	0.125	-3	4	2	0.5	-1	BR
El_Alto	207.68	POS	40	POS	NEG	80	POS	NEG	10	NEG	NEG	10	NEG	NEG	0.5	-1	4	2	4	2	0.125	-3	8	3	1	0	BR
El_Alto	6.7792	NEG	NR	NEG	NEG	NR	NEG	NEG	NR	NEG	NEG	NR	NEG	NEG													NEG_ELISA
El_Alto	6583.7	POS	20480	POS	POS	10240	POS	POS	2560	POS	POS	640	POS	POS	2	1	8	3	32	5	0.25	-2	16	4	4	2	BP
El_Alto	102.87	POS	80	POS	NEG	40	POS	NEG	20	POS	NEG	10	NEG	NEG	2	1	4	2	8	3	0.5	-1	4	2	2	1	BP
La_Paz	7896.3	POS	2560	POS	POS	5120	POS	POS	1280	POS	POS	160	POS	NEG	0.5	-1	2	1	16	4	0.25	-2	32	5	8	3	BR
La_Paz	6651.3	POS	2560	POS	POS	5120	POS	POS	2560	POS	POS	80	POS	NEG	0.5	-1	1	0	32	5	0.5	-1	64	6	32	5	BR
La_Paz	71.758	POS	80	POS	NEG	40	POS	NEG	40	POS	NEG	10	NEG	NEG	2	1	2	1	8	3	1	0	4	2	4	2	BP
La_Paz	219.37	POS	160	POS	NEG	320	POS	NEG	160	POS	NEG	10	NEG	NEG	0.5	-1	1	0	16	4	0.5	-1	32	5	16	4	BR
La_Paz	584.8	POS	160	POS	NEG	80	POS	NEG	80	POS	NEG	10	NEG	NEG	2	1	2	1	16	4	1	0	8	3	8	3	BP
La_Paz	97.716	POS	80	POS	NEG	40	POS	NEG	40	POS	NEG	10	NEG	NEG	2	1	2	1	8	3	1	0	4	2	4	2	BP
La_Paz	1785	POS	320	POS	NEG	10240	POS	POS	320	POS	NEG	80	POS	NEG	0.03125	-5	1	0	4	2	0.03125	-5	128	7	4	2	BR
La_Paz	541.6	POS	80	POS	NEG	20	POS	NEG	160	POS	NEG	10	NEG	NEG	4	2	0.5	-1	8	3	8	3	2	1	16	4	IN
La_Paz	1315.2	POS	80	POS	NEG	320	POS	NEG	40	POS	NEG	10	NEG	NEG	0.25	-2	2	1	8	3	0.125	-3	32	5	4	2	BR
La_Paz	310.74	POS	160	POS	NEG	320	POS	NEG	160	POS	NEG	10	NEG	NEG	0.5	-1	1	0	16	4	0.5	-1	32	5	16	4	BR
La_Paz	4497.3	POS	2560	POS	POS	1280	POS	POS	1280	POS	POS	40	POS	NEG	2	1	2	1	64	6	1	0	32	5	32	5	BP
La_Paz	102.64	POS	10	NEG	NEG	10	NEG	NEG	10	NEG	NEG	10	NEG	NEG	1	0	1	0	1	0	1	0	1	0	1	0	NEG
La_Paz	34.777	DOU	10	NEG	NEG	40	POS	NEG	10	NEG	NEG	10	NEG	NEG	0.25	-2	1	0	1	0	0.25	-2	4	2	1	0	BR
La_Paz	3499.5	POS	160	POS	NEG	2560	POS	POS	80	POS	NEG	10	NEG	NEG	0.0625	-4	2	1	16	4	0.03125	-5	256	8	8	3	BR
La_Paz	84.289	POS	80	POS	NEG	160	POS	NEG	320	POS	NEG	10	NEG	NEG	0.5	-1	0.25	-2	8	3	2	1	16	4	32	5	IN
La_Paz	250.17	POS	80	POS	NEG	320	POS	NEG	80	POS	NEG	10	NEG	NEG	0.25	-2	1	0	8	3	0.25	-2	32	5	8	3	BR
La_Paz	215.83	POS	80	POS	NEG	160	POS	NEG	40	POS	NEG	10	NEG	NEG	0.5	-1	2	1	8	3	0.25	-2	16	4	4	2	BR
La_Paz	436	POS	40	POS	NEG	10	NEG	NEG	80	POS	NEG	10	NEG	NEG	4	2	0.5	-1	4	2	8	3	1	0	8	3	IN
La_Paz	227.07	POS	10	NEG	NEG	10	NEG	NEG	20	POS	NEG	10	NEG	NEG	1	0	0.5	-1	1	0	2	1	1	0	2	1	IN
La_Paz	7574.4	POS	5120	POS	POS	10240	POS	POS	1280	POS	POS	160	POS	NEG	0.5	-1	4	2	32	5	0.125	-3	64	6	8	3	BR
La_Paz	124.42	POS	10	NEG	NEG	20	POS	NEG	10	NEG	NEG	10	NEG	NEG	0.5	-1	1	0	1	0	0.5	-1	2	1	1	0	BR
La_Paz	3.18	NEG	NR	NEG	NEG	NR	NEG	NEG	NR	NEG	NEG	NR	NEG	NEG													NEG_ELISA
La_Paz	100.4	POS	40	POS	NEG	160	POS	NEG	40	POS	NEG	10	NEG	NEG	0.25	-2	1	0	4	2	0.25	-2	16	4	4	2	BR
La_Paz	481.6	POS	80	POS	NEG	40	POS	NEG	80	POS	NEG	10	NEG	NEG	2	1	1	0	8	3	2	1	4	2	8	3	BP
La_Paz	70.515	POS	10	NEG	NEG	160	POS	NEG	10	NEG	NEG	10	NEG	NEG	0.0625	-4	1	0	1	0	0.0625	-4	16	4	1	0	BR
La_Paz	3131.7	POS	320	POS	NEG	160	POS	NEG	160	POS	NEG	10	NEG	NEG	2	1	2	1	32	5	1	0	16	4	16	4	BP
La_Paz	72.802	POS	20	POS	NEG	10	NEG	NEG	10	NEG	NEG	10	NEG	NEG	2	1	2	1	2	1	1	0	1	0	1	0	BP
La_Paz	2694.7	POS	640	POS	POS	5120	POS	POS	320	POS	NEG	40	POS	NEG	0.125	-3	2	1	16	4	0.0625	-4	128	7	8	3	BR
La_Paz	2093.2	POS	640	POS	POS	2560	POS	POS	320	POS	NEG	80	POS	NEG	0.25	-2	2	1	8	3	0.125	-3	32	5	4	2	BR
La_Paz	5517.7	POS	1280	POS	POS	2560	POS	POS	1280	POS	POS	160	POS	NEG	0.5	-1	1	0	8	3	0.5	-1	16	4	8	3	BR
La_Paz	92.047	POS	10	NEG	NEG	10	NEG	NEG	10	NEG	NEG	10	NEG	NEG	1	0	1	0	1	0	1	0	1	0	1	0	NEG
La_Paz	1196.6	POS	80	POS	NEG	640	POS	POS	40	POS	NEG	10	NEG	NEG	0.125	-3	2	1	8	3	0.0625	-4	64	6	4	2	BR
La_Paz	14.189	NEG	10	NEG	NEG	NR	NEG	NEG	NR	NEG	NEG	NR	NEG	NEG													NEG_ELISA
La_Paz	218.12	POS	40	POS	NEG	320	POS	NEG	80	POS	NEG	10	NEG	NEG	0.125	-3	0.5	-1	4	2	0.25	-2	32	5	8	3	BR
La_Paz	361.33	POS	320	POS	NEG	160	POS	NEG	80	POS	NEG	10	NEG	NEG	2	1	4	2	32	5	0.5	-1	16	4	8	3	BP
La_Paz	371.2	POS	160	POS	NEG	320	POS	NEG	80	POS	NEG	10	NEG	NEG	0.5	-1	2	1	16	4	0.25	-2	32	5	8	3	BR
La_Paz	1831.9	POS	640	POS	POS	10240	POS	POS	160	POS	NEG	20	POS	NEG	0.0625	-4	4	2	32	5	0.015625	-6	512	9	8	3	BR
La_Paz	188.15	POS	160	POS	NEG	80	POS	NEG	80	POS	NEG	10	NEG	NEG	2	1	2	1	16	4	1	0	8	3	8	3	BP
La_Paz	37.841	POS	10	NEG	NEG	40	POS	NEG	10	NEG	NEG	10	NEG	NEG	0.25	-2	1	0	1	0	0.25	-2	4	2	1	0	BR
La_Paz	95.925	POS	20	POS	NEG	320	POS	NEG	40	POS	NEG	10	NEG	NEG	0.0625	-4	0.5	-1	2	1	0.125	-3	32	5	4	2	BR
La_Paz	1764.4	POS	640	POS	POS	2560	POS	POS	640	POS	POS	40	POS	NEG	0.25	-2	1	0	16	4	0.25	-2	64	6	16	4	BR
La_Paz	1497.2	POS	640	POS	POS	2560	POS	POS	640	POS	POS	20	POS	NEG	0.25	-2	1	0	32	5	0.25	-2	128	7	32	5	BR
La_Paz	147.15	POS	160	POS	NEG	80	POS	NEG	20	POS	NEG	10	NEG	NEG	2	1	8	3	16	4	0.25	-2	8	3	2	1	BP
La_Paz	58.711	POS	10	NEG	NEG	10	NEG	NEG	10	NEG	NEG	10	NEG	NEG	1	0	1	0	1	0	1	0	1	0	1	0	NEG
La_Paz	135.91	POS	10	NEG	NEG	10	NEG	NEG	10	NEG	NEG	10	NEG	NEG	1	0	1	0	1	0	1	0	1	0	1	0	NEG
La_Paz	642.69	POS	20	POS	NEG	40	POS	NEG	10	NEG	NEG	10	NEG	NEG	0.5	-1	2	1	2	1	0.25	-2	4	2	1	0	BR
La_Paz	96.075	POS	80	POS	NEG	160	POS	NEG	40	POS	NEG	10	NEG	NEG	0.5	-1	2	1	8	3	0.25	-2	16	4	4	2	BR
La_Paz	275.35	POS	10	NEG	NEG	10	NEG	NEG	10	NEG	NEG	10	NEG	NEG	1	0	1	0	1	0	1	0	1	0	1	0	NEG
La_Paz	1126.7	POS	160	POS	NEG	640	POS	POS	40	POS	NEG	10	NEG	NEG	0.25	-2	4	2	16	4	0.0625	-4	64	6	4	2	BR
La_Paz	1024.5	POS	640	POS	POS	2560	POS	POS	160	POS	NEG	20	POS	NEG	0.25	-2	4	2	32	5	0.0625	-4	128	7	8	3	BR
La_Paz	100.4	POS	10	NEG	NEG	10	NEG	NEG	10	NEG	NEG	10	NEG	NEG	1	0	1	0	1	0	1	0	1	0	1	0	NEG
La_Paz	370.45	POS	160	POS	NEG	640	POS	POS	80	POS	NEG	10	NEG	NEG	0.25	-2	2	1	16	4	0.125	-3	64	6	8	3	BR
La_Paz	146.73	POS	10	NEG	NEG	40	POS	NEG	10	NEG	NEG	10	NEG	NEG	0.25	-2	1	0	1	0	0.25	-2	4	2	1	0	BR
La_Paz	1470.8	POS	320	POS	NEG	640	POS	POS	640	POS	POS	160	POS	NEG	0.5	-1	0.5	-1	2	1	1	0	4	2	4	2	BR
La_Paz	460	POS	40	POS	NEG	40	POS	NEG	80	POS	NEG	10	NEG	NEG	1	0	0.5	-1	4	2	2	1	4	2	8	3	IN
La_Paz	4.3368	NEG	10	NEG	NEG	NR	NEG	NEG	NR	NEG	NEG	NR	NEG	NEG													NEG_ELISA
La_Paz	61.488	POS	10	NEG	NEG	20	POS	NEG	10	NEG	NEG	10	NEG	NEG	0.5	-1	1	0	1	0	0.5	-1	2	1	1	0	BR
La_Paz	46.222	POS	10	NEG	NEG	10	NEG	NEG	10	NEG	NEG	10	NEG	NEG	1	0	1	0	1	0	1	0	1	0	1	0	NEG
La_Paz	45.884	POS	10	NEG	NEG	10	NEG	NEG	10	NEG	NEG	10	NEG	NEG	1	0	1	0	1	0	1	0	1	0	1	0	NEG
La_Paz	48.926	POS	640	POS	POS	160	POS	NEG	160	POS	NEG	10	NEG	NEG	4	2	4	2	64	6	1	0	16	4	16	4	BP
La_Paz	105.17	POS	80	POS	NEG	80	POS	NEG	10	NEG	NEG	10	NEG	NEG	1	0	8	3	8	3	0.125	-3	8	3	1	0	BP
La_Paz	14.324	NEG	NR	NEG	NEG	NR	NEG	NEG	NR	NEG	NEG	NR	NEG	NEG													NEG_ELISA
La_Paz	137.78	POS	40	POS	NEG	160	POS	NEG	20	POS	NEG	10	NEG	NEG	0.25	-2	2	1	4	2	0.125	-3	16	4	2	1	BR
La_Paz	462.4	POS	80	POS	NEG	20	POS	NEG	160	POS	NEG	10	NEG	NEG	4	2	0.5	-1	8	3	8	3	2	1	16	4	IN
La_Paz	266.78	POS	320	POS	NEG	320	POS	NEG	160	POS	NEG	10	NEG	NEG	1	0	2	1	32	5	0.5	-1	32	5	16	4	BP
La_Paz	63.074	POS	10	NEG	NEG	20	POS	NEG	10	NEG	NEG	10	NEG	NEG	0.5	-1	1	0	1	0	0.5	-1	2	1	1	0	BR
La_Paz	5598.4	POS	5120	POS	POS	10240	POS	POS	1280	POS	POS	160	POS	NEG	0.5	-1	4	2	32	5	0.125	-3	64	6	8	3	BR
La_Paz	76.531	POS	160	POS	NEG	80	POS	NEG	40	POS	NEG	10	NEG	NEG	2	1	4	2	16	4	0.5	-1	8	3	4	2	BP
La_Paz	25.368	NEG	10	NEG	NEG	40	POS	NEG	NR	NEG	NEG	10	NEG	NEG	0.25	-2			1	0			4	2			NEG_ELISA
La_Paz	101.89	POS	80	POS	NEG	40	POS	NEG	40	POS	NEG	10	NEG	NEG	2	1	2	1	8	3	1	0	4	2	4	2	BP
La_Paz	534.4	POS	320	POS	NEG	640	POS	POS	80	POS	NEG	10	NEG	NEG	0.5	-1	4	2	32	5	0.125	-3	64	6	8	3	BR
La_Paz	11230	POS	1280	POS	POS	10240	POS	POS	640	POS	POS	160	POS	NEG	0.125	-3	2	1	8	3	0.0625	-4	64	6	4	2	BR
La_Paz	199.39	POS	80	POS	NEG	320	POS	NEG	160	POS	NEG	10	NEG	NEG	0.25	-2	0.5	-1	8	3	0.5	-1	32	5	16	4	BR
La_Paz	2924.2	POS	640	POS	POS	2560	POS	POS	640	POS	POS	20	POS	NEG	0.25	-2	1	0	32	5	0.25	-2	128	7	32	5	BR
La_Paz	2513	POS	1280	POS	POS	5120	POS	POS	160	POS	NEG	40	POS	NEG	0.25	-2	8	3	32	5	0.03125	-5	128	7	4	2	BR
La_Paz	97.268	POS	40	POS	NEG	160	POS	NEG	40	POS	NEG	10	NEG	NEG	0.25	-2	1	0	4	2	0.25	-2	16	4	4	2	BR
La_Paz	346.95	POS	160	POS	NEG	640	POS	POS	80	POS	NEG	10	NEG	NEG	0.25	-2	2	1	16	4	0.125	-3	64	6	8	3	BR
La_Paz	2078.5	POS	640	POS	POS	2560	POS	POS	640	POS	POS	40	POS	NEG	0.25	-2	1	0	16	4	0.25	-2	64	6	16	4	BR
La_Paz	2430.8	POS	1280	POS	POS	640	POS	POS	320	POS	NEG	160	POS	NEG	2	1	4	2	8	3	0.5	-1	4	2	2	1	BP
La_Paz	13168	POS	1280	POS	POS	20480	POS	POS	640	POS	POS	80	POS	NEG	0.0625	-4	2	1	16	4	0.03125	-5	256	8	8	3	BR
La_Paz	522.4	POS	10	NEG	NEG	10	NEG	NEG	10	NEG	NEG	10	NEG	NEG	1	0	1	0	1	0	1	0	1	0	1	0	NEG
La_Paz	110.25	POS	10	NEG	NEG	10	NEG	NEG	10	NEG	NEG	10	NEG	NEG	1	0	1	0	1	0	1	0	1	0	1	0	NEG
La_Paz	13574	POS	1280	POS	POS	5120	POS	POS	1280	POS	POS	40	POS	NEG	0.25	-2	1	0	32	5	0.25	-2	128	7	32	5	BR
La_Paz	49.058	POS	10	NEG	NEG	40	POS	NEG	10	NEG	NEG	10	NEG	NEG	0.25	-2	1	0	1	0	0.25	-2	4	2	1	0	BR
La_Paz	106.67	POS	10	NEG	NEG	10	NEG	NEG	10	NEG	NEG	10	NEG	NEG	1	0	1	0	1	0	1	0	1	0	1	0	NEG
La_Paz	500.8	POS	320	POS	NEG	160	POS	NEG	40	POS	NEG	10	NEG	NEG	2	1	8	3	32	5	0.25	-2	16	4	4	2	BP
La_Paz	234.4	POS	160	POS	NEG	1280	POS	POS	20	POS	NEG	10	NEG	NEG	0.125	-3	8	3	16	4	0.015625	-6	128	7	2	1	BR
La_Paz	3.13	NEG	NR	NEG	NEG	NR	NEG	NEG	NR	NEG	NEG	NR	NEG	NEG													NEG_ELISA
La_Paz	1708.6	POS	40	POS	NEG	10	NEG	NEG	20	POS	NEG	10	NEG	NEG	4	2	2	1	4	2	2	1	1	0	2	1	BP
La_Paz	15.989	NEG	10	NEG	NEG	NR	NEG	NEG	NR	NEG	NEG	NR	NEG	NEG													NEG_ELISA
La_Paz	374.47	POS	320	POS	NEG	320	POS	NEG	160	POS	NEG	10	NEG	NEG	1	0	2	1	32	5	0.5	-1	32	5	16	4	BP
La_Paz	258.08	POS	10	NEG	NEG	20	POS	NEG	10	NEG	NEG	10	NEG	NEG	0.5	-1	1	0	1	0	0.5	-1	2	1	1	0	BR
La_Paz	259.33	POS	40	POS	NEG	20	POS	NEG	10	NEG	NEG	10	NEG	NEG	2	1	4	2	4	2	0.5	-1	2	1	1	0	BP
La_Paz	890.84	POS	1280	POS	POS	640	POS	POS	160	POS	NEG	20	POS	NEG	2	1	8	3	64	6	0.25	-2	32	5	8	3	BP
La_Paz	3865.2	POS	640	POS	POS	2560	POS	POS	320	POS	NEG	40	POS	NEG	0.25	-2	2	1	16	4	0.125	-3	64	6	8	3	BR
La_Paz	4003.5	POS	640	POS	POS	2560	POS	POS	2560	POS	POS	40	POS	NEG	0.25	-2	0.25	-2	16	4	1	0	64	6	64	6	BR
La_Paz	4.0727	NEG	NR	NEG	NEG	NR	NEG	NEG	NR	NEG	NEG	NR	NEG	NEG													NEG_ELISA
La_Paz	2071.7	POS	640	POS	POS	1280	POS	POS	640	POS	POS	20	POS	NEG	0.5	-1	1	0	32	5	0.5	-1	64	6	32	5	BR
La_Paz	464.34	POS	160	POS	NEG	640	POS	POS	160	POS	NEG	10	NEG	NEG	0.25	-2	1	0	16	4	0.25	-2	64	6	16	4	BR
La_Paz	3484.6	POS	2560	POS	POS	10240	POS	POS	2560	POS	POS	40	POS	NEG	0.25	-2	1	0	64	6	0.25	-2	256	8	64	6	BR
La_Paz	193.85	POS	20	POS	NEG	10	NEG	NEG	10	NEG	NEG	10	NEG	NEG	2	1	2	1	2	1	1	0	1	0	1	0	BP
La_Paz	3019.2	POS	2560	POS	POS	20480	POS	POS	2560	POS	POS	160	POS	NEG	0.125	-3	1	0	16	4	0.125	-3	128	7	16	4	BR
La_Paz	171.84	POS	40	POS	NEG	80	POS	NEG	20	POS	NEG	10	NEG	NEG	0.5	-1	2	1	4	2	0.25	-2	8	3	2	1	BR
La_Paz	277.02	POS	40	POS	NEG	160	POS	NEG	20	POS	NEG	10	NEG	NEG	0.25	-2	2	1	4	2	0.125	-3	16	4	2	1	BR
La_Paz	200.67	POS	40	POS	NEG	20	POS	NEG	10	NEG	NEG	10	NEG	NEG	2	1	4	2	4	2	0.5	-1	2	1	1	0	BP
La_Paz	2008.1	POS	640	POS	POS	640	POS	POS	640	POS	POS	40	POS	NEG	1	0	1	0	16	4	1	0	16	4	16	4	BP
La_Paz	599.15	POS	20	POS	NEG	80	POS	NEG	20	POS	NEG	10	NEG	NEG	0.25	-2	1	0	2	1	0.25	-2	8	3	2	1	BR
La_Paz	3.12	NEG	NR	NEG	NEG	NR	NEG	NEG	NR	NEG	NEG	NR	NEG	NEG													NEG_ELISA
La_Paz	171.45	POS	10	NEG	NEG	10	NEG	NEG	10	NEG	NEG	10	NEG	NEG	1	0	1	0	1	0	1	0	1	0	1	0	NEG
La_Paz	3214.2	POS	1280	POS	POS	640	POS	POS	2560	POS	POS	80	POS	NEG	2	1	0.5	-1	16	4	4	2	8	3	32	5	IN
La_Paz	3569.5	POS	2560	POS	POS	5120	POS	POS	640	POS	POS	80	POS	NEG	0.5	-1	4	2	32	5	0.125	-3	64	6	8	3	BR
La_Paz	1990.8	POS	640	POS	POS	10240	POS	POS	320	POS	NEG	40	POS	NEG	0.0625	-4	2	1	16	4	0.03125	-5	256	8	8	3	BR
La_Paz	268.49	POS	160	POS	NEG	160	POS	NEG	40	POS	NEG	10	NEG	NEG	1	0	4	2	16	4	0.25	-2	16	4	4	2	BP
La_Paz	615.49	POS	80	POS	NEG	20	POS	NEG	20	POS	NEG	10	NEG	NEG	4	2	4	2	8	3	1	0	2	1	2	1	BP
La_Paz	309.07	POS	80	POS	NEG	40	POS	NEG	40	POS	NEG	10	NEG	NEG	2	1	2	1	8	3	1	0	4	2	4	2	BP
La_Paz	441.87	POS	80	POS	NEG	320	POS	NEG	160	POS	NEG	10	NEG	NEG	0.25	-2	0.5	-1	8	3	0.5	-1	32	5	16	4	BR
La_Paz	244.51	POS	20	POS	NEG	10	NEG	NEG	10	NEG	NEG	10	NEG	NEG	2	1	2	1	2	1	1	0	1	0	1	0	BP
La_Paz	3399.7	POS	5120	POS	POS	2560	POS	POS	1280	POS	POS	80	POS	NEG	2	1	4	2	64	6	0.5	-1	32	5	16	4	BP
La_Paz	3066.3	POS	2560	POS	POS	5120	POS	POS	1280	POS	POS	40	POS	NEG	0.5	-1	2	1	64	6	0.25	-2	128	7	32	5	BR
La_Paz	7422.2	POS	2560	POS	POS	1280	POS	POS	5120	POS	POS	160	POS	NEG	2	1	0.5	-1	16	4	4	2	8	3	32	5	IN
La_Paz	170.47	POS	10	NEG	NEG	10	NEG	NEG	10	NEG	NEG	10	NEG	NEG	1	0	1	0	1	0	1	0	1	0	1	0	NEG
La_Paz	2213.3	POS	640	POS	POS	2560	POS	POS	160	POS	NEG	40	POS	NEG	0.25	-2	4	2	16	4	0.0625	-4	64	6	4	2	BR
La_Paz	88.675	POS	10	NEG	NEG	10	NEG	NEG	10	NEG	NEG	10	NEG	NEG	1	0	1	0	1	0	1	0	1	0	1	0	NEG
La_Paz	759.56	POS	80	POS	NEG	320	POS	NEG	80	POS	NEG	10	NEG	NEG	0.25	-2	1	0	8	3	0.25	-2	32	5	8	3	BR
La_Paz	503.15	POS	160	POS	NEG	640	POS	POS	80	POS	NEG	10	NEG	NEG	0.25	-2	2	1	16	4	0.125	-3	64	6	8	3	BR
La_Paz	768.94	POS	80	POS	NEG	1280	POS	POS	160	POS	NEG	10	NEG	NEG	0.0625	-4	0.5	-1	8	3	0.125	-3	128	7	16	4	BR
La_Paz	104.48	POS	80	POS	NEG	40	POS	NEG	20	POS	NEG	10	NEG	NEG	2	1	4	2	8	3	0.5	-1	4	2	2	1	BP
La_Paz	4255.1	POS	5120	POS	POS	5120	POS	POS	1280	POS	POS	80	POS	NEG	1	0	4	2	64	6	0.25	-2	64	6	16	4	BP
La_Paz	3097.8	POS	2560	POS	POS	1280	POS	POS	2560	POS	POS	80	POS	NEG	2	1	1	0	32	5	2	1	16	4	32	5	BP
La_Paz	460.26	POS	320	POS	NEG	640	POS	POS	80	POS	NEG	10	NEG	NEG	0.5	-1	4	2	32	5	0.125	-3	64	6	8	3	BR
La_Paz	66.056	POS	10	NEG	NEG	10	NEG	NEG	10	NEG	NEG	10	NEG	NEG	1	0	1	0	1	0	1	0	1	0	1	0	NEG
La_Paz	5365.3	POS	2560	POS	POS	10240	POS	POS	640	POS	POS	160	POS	NEG	0.25	-2	4	2	16	4	0.0625	-4	64	6	4	2	BR
La_Paz	73.767	POS	10	NEG	NEG	10	NEG	NEG	10	NEG	NEG	10	NEG	NEG	1	0	1	0	1	0	1	0	1	0	1	0	NEG
La_Paz	99.598	POS	10	NEG	NEG	40	POS	NEG	10	NEG	NEG	10	NEG	NEG	0.25	-2	1	0	1	0	0.25	-2	4	2	1	0	BR
La_Paz	1878.1	POS	1280	POS	POS	5120	POS	POS	1280	POS	POS	20	POS	NEG	0.25	-2	1	0	64	6	0.25	-2	256	8	64	6	BR
La_Paz	474.55	POS	160	POS	NEG	640	POS	POS	40	POS	NEG	10	NEG	NEG	0.25	-2	4	2	16	4	0.0625	-4	64	6	4	2	BR
La_Paz	517.45	POS	160	POS	NEG	320	POS	NEG	40	POS	NEG	10	NEG	NEG	0.5	-1	4	2	16	4	0.125	-3	32	5	4	2	BR
La_Paz	335.66	POS	10	NEG	NEG	40	POS	NEG	10	NEG	NEG	10	NEG	NEG	0.25	-2	1	0	1	0	0.25	-2	4	2	1	0	BR
La_Paz	345.08	POS	80	POS	NEG	40	POS	NEG	40	POS	NEG	10	NEG	NEG	2	1	2	1	8	3	1	0	4	2	4	2	BP
La_Paz	109.24	POS	10	NEG	NEG	10	NEG	NEG	10	NEG	NEG	10	NEG	NEG	1	0	1	0	1	0	1	0	1	0	1	0	NEG
La_Paz	341.79	POS	10	NEG	NEG	40	POS	NEG	10	NEG	NEG	10	NEG	NEG	0.25	-2	1	0	1	0	0.25	-2	4	2	1	0	BR
La_Paz	3.4182	NEG	NR	NEG	NEG	NR	NEG	NEG	NR	NEG	NEG	NR	NEG	NEG													NEG_ELISA
La_Paz	96.9	POS	10	NEG	NEG	10	NEG	NEG	10	NEG	NEG	10	NEG	NEG	1	0	1	0	1	0	1	0	1	0	1	0	NEG
La_Paz	3277.1	POS	1280	POS	POS	5120	POS	POS	640	POS	POS	40	POS	NEG	0.25	-2	2	1	32	5	0.125	-3	128	7	16	4	BR
La_Paz	273.69	POS	40	POS	NEG	20	POS	NEG	20	POS	NEG	10	NEG	NEG	2	1	2	1	4	2	1	0	2	1	2	1	BP
La_Paz	759.56	POS	640	POS	POS	640	POS	POS	160	POS	NEG	10	NEG	NEG	1	0	4	2	64	6	0.25	-2	64	6	16	4	BP
La_Paz	307.06	POS	320	POS	NEG	160	POS	NEG	40	POS	NEG	10	NEG	NEG	2	1	8	3	32	5	0.25	-2	16	4	4	2	BP
La_Paz	1085.4	POS	640	POS	POS	320	POS	NEG	320	POS	NEG	40	POS	NEG	2	1	2	1	16	4	1	0	8	3	8	3	BP
La_Paz	443.91	POS	160	POS	NEG	80	POS	NEG	80	POS	NEG	10	NEG	NEG	2	1	2	1	16	4	1	0	8	3	8	3	BP
La_Paz	122.86	POS	40	POS	NEG	160	POS	NEG	20	POS	NEG	10	NEG	NEG	0.25	-2	2	1	4	2	0.125	-3	16	4	2	1	BR
La_Paz	1956.1	POS	1280	POS	POS	2560	POS	POS	160	POS	NEG	40	POS	NEG	0.5	-1	8	3	32	5	0.0625	-4	64	6	4	2	BR
La_Paz	1696.1	POS	80	POS	NEG	320	POS	NEG	80	POS	NEG	10	NEG	NEG	0.25	-2	1	0	8	3	0.25	-2	32	5	8	3	BR
La_Paz	2622.9	POS	1280	POS	POS	1280	POS	POS	1280	POS	POS	80	POS	NEG	1	0	1	0	16	4	1	0	16	4	16	4	BP
La_Paz	2968.8	POS	160	POS	NEG	1280	POS	POS	20	POS	NEG	10	NEG	NEG	0.125	-3	8	3	16	4	0.015625	-6	128	7	2	1	BR
La_Paz	267.45	POS	80	POS	NEG	40	POS	NEG	160	POS	NEG	10	NEG	NEG	2	1	0.5	-1	8	3	4	2	4	2	16	4	IN
La_Paz	480.68	POS	160	POS	NEG	80	POS	NEG	20	POS	NEG	10	NEG	NEG	2	1	8	3	16	4	0.25	-2	8	3	2	1	BP
La_Paz	219.18	POS	40	POS	NEG	160	POS	NEG	40	POS	NEG	10	NEG	NEG	0.25	-2	1	0	4	2	0.25	-2	16	4	4	2	BR
La_Paz	321.36	POS	80	POS	NEG	160	POS	NEG	80	POS	NEG	10	NEG	NEG	0.5	-1	1	0	8	3	0.5	-1	16	4	8	3	BR
La_Paz	262.13	POS	40	POS	NEG	20	POS	NEG	10	NEG	NEG	10	NEG	NEG	2	1	4	2	4	2	0.5	-1	2	1	1	0	BP
La_Paz	4223.7	POS	1280	POS	POS	10240	POS	POS	2560	POS	POS	80	POS	NEG	0.125	-3	0.5	-1	16	4	0.25	-2	128	7	32	5	BR
La_Paz	175.93	POS	160	POS	NEG	320	POS	NEG	80	POS	NEG	10	NEG	NEG	0.5	-1	2	1	16	4	0.25	-2	32	5	8	3	BR
La_Paz	323.43	POS	40	POS	NEG	160	POS	NEG	40	POS	NEG	10	NEG	NEG	0.25	-2	1	0	4	2	0.25	-2	16	4	4	2	BR
La_Paz	1933	POS	160	POS	NEG	640	POS	POS	80	POS	NEG	10	NEG	NEG	0.25	-2	2	1	16	4	0.125	-3	64	6	8	3	BR
La_Paz	314.48	POS	160	POS	NEG	160	POS	NEG	80	POS	NEG	10	NEG	NEG	1	0	2	1	16	4	0.5	-1	16	4	8	3	BP
La_Paz	335.66	POS	80	POS	NEG	320	POS	NEG	40	POS	NEG	10	NEG	NEG	0.25	-2	2	1	8	3	0.125	-3	32	5	4	2	BR
La_Paz	311.15	POS	80	POS	NEG	80	POS	NEG	160	POS	NEG	10	NEG	NEG	1	0	0.5	-1	8	3	2	1	8	3	16	4	IN
La_Paz	3016	POS	1280	POS	POS	2560	POS	POS	640	POS	POS	40	POS	NEG	0.5	-1	2	1	32	5	0.25	-2	64	6	16	4	BR
La_Paz	1597.8	POS	1280	POS	POS	1280	POS	POS	320	POS	NEG	20	POS	NEG	1	0	4	2	64	6	0.25	-2	64	6	16	4	BP
La_Paz	129.36	POS	80	POS	NEG	40	POS	NEG	80	POS	NEG	10	NEG	NEG	2	1	1	0	8	3	2	1	4	2	8	3	BP
La_Paz	1320.5	POS	320	POS	NEG	1280	POS	POS	80	POS	NEG	10	NEG	NEG	0.25	-2	4	2	32	5	0.0625	-4	128	7	8	3	BR
La_Paz	2751.8	POS	1280	POS	POS	5120	POS	POS	640	POS	POS	40	POS	NEG	0.25	-2	2	1	32	5	0.125	-3	128	7	16	4	BR
La_Paz	15802	POS	5120	POS	POS	20480	POS	POS	2560	POS	POS	640	POS	POS	0.25	-2	2	1	8	3	0.125	-3	32	5	4	2	BR
La_Paz	10.836	NEG	NR	NEG	NEG	NR	NEG	NEG	NR	NEG	NEG	NR	NEG	NEG													NEG_ELISA
La_Paz	474.55	POS	640	POS	POS	1280	POS	POS	80	POS	NEG	10	NEG	NEG	0.5	-1	8	3	64	6	0.0625	-4	128	7	8	3	BR
La_Paz	313.65	POS	80	POS	NEG	160	POS	NEG	20	POS	NEG	10	NEG	NEG	0.5	-1	4	2	8	3	0.125	-3	16	4	2	1	BR
La_Paz	256	POS	160	POS	NEG	640	POS	POS	160	POS	NEG	10	NEG	NEG	0.25	-2	1	0	16	4	0.25	-2	64	6	16	4	BR
La_Paz	57.875	POS	20	POS	NEG	640	POS	POS	10	NEG	NEG	10	NEG	NEG	0.03125	-5	2	1	2	1	0.015625	-6	64	6	1	0	BR
La_Paz	3626.1	POS	1280	POS	POS	5120	POS	POS	1280	POS	POS	40	POS	NEG	0.25	-2	1	0	32	5	0.25	-2	128	7	32	5	BR
La_Paz	475.43	POS	20	POS	NEG	20	POS	NEG	10	NEG	NEG	10	NEG	NEG	1	0	2	1	2	1	0.5	-1	2	1	1	0	BP
La_Paz	2043.7	POS	640	POS	POS	10240	POS	POS	80	POS	NEG	80	POS	NEG	0.0625	-4	8	3	8	3	0.0078125	-7	128	7	1	0	BR
La_Paz	364.99	POS	80	POS	NEG	160	POS	NEG	40	POS	NEG	10	NEG	NEG	0.5	-1	2	1	8	3	0.25	-2	16	4	4	2	BR
La_Paz	115.78	POS	10	NEG	NEG	10	NEG	NEG	10	NEG	NEG	10	NEG	NEG	1	0	1	0	1	0	1	0	1	0	1	0	NEG
La_Paz	323.78	POS	80	POS	NEG	160	POS	NEG	40	POS	NEG	10	NEG	NEG	0.5	-1	2	1	8	3	0.25	-2	16	4	4	2	BR
La_Paz	3	NEG	10	NEG	NEG	NR	NEG	NEG	NR	NEG	NEG	NR	NEG	NEG													NEG_ELISA
La_Paz	345.39	POS	40	POS	NEG	160	POS	NEG	10	NEG	NEG	10	NEG	NEG	0.25	-2	4	2	4	2	0.0625	-4	16	4	1	0	BR
La_Paz	360.5	POS	80	POS	NEG	320	POS	NEG	20	POS	NEG	10	NEG	NEG	0.25	-2	4	2	8	3	0.0625	-4	32	5	2	1	BR
La_Paz	338.26	POS	160	POS	NEG	640	POS	POS	80	POS	NEG	10	NEG	NEG	0.25	-2	2	1	16	4	0.125	-3	64	6	8	3	BR
La_Paz	376.66	POS	160	POS	NEG	320	POS	NEG	80	POS	NEG	10	NEG	NEG	0.5	-1	2	1	16	4	0.25	-2	32	5	8	3	BR
La_Paz	7408.7	POS	10240	POS	POS	10240	POS	POS	10240	POS	POS	160	POS	NEG	1	0	1	0	64	6	1	0	64	6	64	6	BP
La_Paz	468.93	POS	80	POS	NEG	160	POS	NEG	20	POS	NEG	10	NEG	NEG	0.5	-1	4	2	8	3	0.125	-3	16	4	2	1	BR
La_Paz	2254	POS	1280	POS	POS	5120	POS	POS	320	POS	NEG	40	POS	NEG	0.25	-2	4	2	32	5	0.0625	-4	128	7	8	3	BR
La_Paz	309.93	POS	40	POS	NEG	20	POS	NEG	10	NEG	NEG	10	NEG	NEG	2	1	4	2	4	2	0.5	-1	2	1	1	0	BP
La_Paz	3.08	NEG	NR	NEG	NEG	NR	NEG	NEG	NR	NEG	NEG	NR	NEG	NEG													NEG_ELISA
La_Paz	1410.4	POS	160	POS	NEG	640	POS	POS	80	POS	NEG	10	NEG	NEG	0.25	-2	2	1	16	4	0.125	-3	64	6	8	3	BR
La_Paz	6996.2	POS	5120	POS	POS	10240	POS	POS	2560	POS	POS	160	POS	NEG	0.5	-1	2	1	32	5	0.25	-2	64	6	16	4	BR
La_Paz	701.37	POS	160	POS	NEG	640	POS	POS	80	POS	NEG	20	POS	NEG	0.25	-2	2	1	8	3	0.125	-3	32	5	4	2	BR
La_Paz	364.28	POS	320	POS	NEG	80	POS	NEG	160	POS	NEG	10	NEG	NEG	4	2	2	1	32	5	2	1	8	3	16	4	BP
La_Paz	4557.3	POS	1280	POS	POS	2560	POS	POS	1280	POS	POS	20	POS	NEG	0.5	-1	1	0	64	6	0.5	-1	128	7	64	6	BR
La_Paz	239.63	POS	20	POS	NEG	80	POS	NEG	10	NEG	NEG	10	NEG	NEG	0.25	-2	2	1	2	1	0.125	-3	8	3	1	0	BR
La_Paz	358.5	POS	160	POS	NEG	80	POS	NEG	40	POS	NEG	10	NEG	NEG	2	1	4	2	16	4	0.5	-1	8	3	4	2	BP
La_Paz	252.55	POS	10	NEG	NEG	10	NEG	NEG	10	NEG	NEG	10	NEG	NEG	1	0	1	0	1	0	1	0	1	0	1	0	NEG
La_Paz	4905.3	POS	5120	POS	POS	2560	POS	POS	2560	POS	POS	80	POS	NEG	2	1	2	1	64	6	1	0	32	5	32	5	BP
La_Paz	3.09	NEG	NR	NEG	NEG	NR	NEG	NEG	NR	NEG	NEG	NR	NEG	NEG													NEG_ELISA
La_Paz	86.58	POS	20	POS	NEG	40	POS	NEG	10	NEG	NEG	10	NEG	NEG	0.5	-1	2	1	2	1	0.25	-2	4	2	1	0	BR
La_Paz	374.77	POS	320	POS	NEG	640	POS	POS	80	POS	NEG	20	POS	NEG	0.5	-1	4	2	16	4	0.125	-3	32	5	4	2	BR
La_Paz	183.82	POS	80	POS	NEG	20	POS	NEG	40	POS	NEG	10	NEG	NEG	4	2	2	1	8	3	2	1	2	1	4	2	BP
La_Paz	601.02	POS	640	POS	POS	640	POS	POS	80	POS	NEG	10	NEG	NEG	1	0	8	3	64	6	0.125	-3	64	6	8	3	BP
La_Paz	1008.2	POS	640	POS	POS	320	POS	NEG	320	POS	NEG	20	POS	NEG	2	1	2	1	32	5	1	0	16	4	16	4	BP
La_Paz	313.02	POS	40	POS	NEG	320	POS	NEG	80	POS	NEG	10	NEG	NEG	0.125	-3	0.5	-1	4	2	0.25	-2	32	5	8	3	BR
La_Paz	460.27	POS	320	POS	NEG	320	POS	NEG	80	POS	NEG	10	NEG	NEG	1	0	4	2	32	5	0.25	-2	32	5	8	3	BP
La_Paz	247.21	POS	10	NEG	NEG	20	POS	NEG	10	NEG	NEG	10	NEG	NEG	0.5	-1	1	0	1	0	0.5	-1	2	1	1	0	BR
La_Paz	1008.2	POS	640	POS	POS	320	POS	NEG	160	POS	NEG	10	NEG	NEG	2	1	4	2	64	6	0.5	-1	32	5	16	4	BP
La_Paz	295.03	POS	10	NEG	NEG	10	NEG	NEG	10	NEG	NEG	10	NEG	NEG	1	0	1	0	1	0	1	0	1	0	1	0	NEG
La_Paz	6346.3	POS	5120	POS	POS	20480	POS	POS	5120	POS	POS	160	POS	NEG	0.25	-2	1	0	32	5	0.25	-2	128	7	32	5	BR
La_Paz	4.3429	NEG	NR	NEG	NEG	NR	NEG	NEG	NR	NEG	NEG	NR	NEG	NEG													NEG_ELISA
La_Paz	348.96	POS	80	POS	NEG	320	POS	NEG	40	POS	NEG	10	NEG	NEG	0.25	-2	2	1	8	3	0.125	-3	32	5	4	2	BR
La_Paz	15728	POS	10240	POS	POS	20480	POS	POS	5120	POS	POS	320	POS	NEG	0.5	-1	2	1	32	5	0.25	-2	64	6	16	4	BR
La_Paz	12984	POS	10240	POS	POS	5120	POS	POS	5120	POS	POS	160	POS	NEG	2	1	2	1	64	6	1	0	32	5	32	5	BP
La_Paz	12533	POS	10240	POS	POS	5120	POS	POS	5120	POS	POS	320	POS	NEG	2	1	2	1	32	5	1	0	16	4	16	4	BP
La_Paz	306.53	POS	40	POS	NEG	160	POS	NEG	40	POS	NEG	10	NEG	NEG	0.25	-2	1	0	4	2	0.25	-2	16	4	4	2	BR
La_Paz	2355.1	POS	2560	POS	POS	1280	POS	POS	1280	POS	POS	40	POS	NEG	2	1	2	1	64	6	1	0	32	5	32	5	BP
La_Paz	1229.6	POS	1280	POS	POS	320	POS	NEG	160	POS	NEG	20	POS	NEG	4	2	8	3	64	6	0.5	-1	16	4	8	3	BP
La_Paz	629.17	POS	320	POS	NEG	160	POS	NEG	160	POS	NEG	10	NEG	NEG	2	1	2	1	32	5	1	0	16	4	16	4	BP
La_Paz	10415	POS	2560	POS	POS	5120	POS	POS	1280	POS	POS	160	POS	NEG	0.5	-1	2	1	16	4	0.25	-2	32	5	8	3	BR
La_Paz	1461	POS	640	POS	POS	2560	POS	POS	640	POS	POS	10	NEG	NEG	0.25	-2	1	0	64	6	0.25	-2	256	8	64	6	BR
La_Paz	173.83	POS	10	NEG	NEG	20	POS	NEG	10	NEG	NEG	10	NEG	NEG	0.5	-1	1	0	1	0	0.5	-1	2	1	1	0	BR
La_Paz	657.53	POS	320	POS	NEG	640	POS	POS	160	POS	NEG	10	NEG	NEG	0.5	-1	2	1	32	5	0.25	-2	64	6	16	4	BR
La_Paz	3.02	NEG	NR	NEG	NEG	NR	NEG	NEG	NR	NEG	NEG	NR	NEG	NEG													NEG_ELISA
La_Paz	4456.4	POS	2560	POS	POS	5120	POS	POS	640	POS	POS	320	POS	NEG	0.5	-1	4	2	8	3	0.125	-3	16	4	2	1	BR
La_Paz	4232	POS	640	POS	POS	2560	POS	POS	640	POS	POS	10	NEG	NEG	0.25	-2	1	0	64	6	0.25	-2	256	8	64	6	BR
La_Paz	273.84	POS	20	POS	NEG	80	POS	NEG	20	POS	NEG	10	NEG	NEG	0.25	-2	1	0	2	1	0.25	-2	8	3	2	1	BR
La_Paz	67.452	POS	10	NEG	NEG	10	NEG	NEG	10	NEG	NEG	10	NEG	NEG	1	0	1	0	1	0	1	0	1	0	1	0	NEG
La_Paz	13666	POS	2560	POS	POS	40960	POS	POS	2560	POS	POS	160	POS	NEG	0.0625	-4	1	0	16	4	0.0625	-4	256	8	16	4	BR
La_Paz	5504.3	POS	2560	POS	POS	5120	POS	POS	2560	POS	POS	160	POS	NEG	0.5	-1	1	0	16	4	0.5	-1	32	5	16	4	BR
La_Paz	429.95	POS	80	POS	NEG	40	POS	NEG	40	POS	NEG	10	NEG	NEG	2	1	2	1	8	3	1	0	4	2	4	2	BP
La_Paz	1554.1	POS	2560	POS	POS	320	POS	NEG	320	POS	NEG	40	POS	NEG	8	3	8	3	64	6	1	0	8	3	8	3	BP
La_Paz	1687.2	POS	2560	POS	POS	2560	POS	POS	640	POS	POS	40	POS	NEG	1	0	4	2	64	6	0.25	-2	64	6	16	4	BP
La_Paz	5498.6	POS	5120	POS	POS	5120	POS	POS	5120	POS	POS	160	POS	NEG	1	0	1	0	32	5	1	0	32	5	32	5	BP
La_Paz	267.12	POS	20	POS	NEG	20	POS	NEG	10	NEG	NEG	10	NEG	NEG	1	0	2	1	2	1	0.5	-1	2	1	1	0	BP
La_Paz	3067.4	POS	640	POS	POS	5120	POS	POS	1280	POS	POS	40	POS	NEG	0.125	-3	0.5	-1	16	4	0.25	-2	128	7	32	5	BR
La_Paz	1466.3	POS	640	POS	POS	640	POS	POS	640	POS	POS	40	POS	NEG	1	0	1	0	16	4	1	0	16	4	16	4	BP
La_Paz	2699.9	POS	640	POS	POS	5120	POS	POS	320	POS	NEG	40	POS	NEG	0.125	-3	2	1	16	4	0.0625	-4	128	7	8	3	BR
La_Paz	3262.6	POS	640	POS	POS	1280	POS	POS	640	POS	POS	20	POS	NEG	0.5	-1	1	0	32	5	0.5	-1	64	6	32	5	BR
La_Paz	2474.8	POS	640	POS	POS	1280	POS	POS	320	POS	NEG	40	POS	NEG	0.5	-1	2	1	16	4	0.25	-2	32	5	8	3	BR
La_Paz	3643.2	POS	2560	POS	POS	5120	POS	POS	640	POS	POS	80	POS	NEG	0.5	-1	4	2	32	5	0.125	-3	64	6	8	3	BR
La_Paz	248.59	POS	80	POS	NEG	40	POS	NEG	40	POS	NEG	10	NEG	NEG	2	1	2	1	8	3	1	0	4	2	4	2	BP
La_Paz	221.2	POS	40	POS	NEG	40	POS	NEG	80	POS	NEG	10	NEG	NEG	1	0	0.5	-1	4	2	2	1	4	2	8	3	IN
La_Paz	190.02	POS	80	POS	NEG	40	POS	NEG	20	POS	NEG	10	NEG	NEG	2	1	4	2	8	3	0.5	-1	4	2	2	1	BP
La_Paz	4687.4	POS	2560	POS	POS	10240	POS	POS	1280	POS	POS	80	POS	NEG	0.25	-2	2	1	32	5	0.125	-3	128	7	16	4	BR
La_Paz	1575.4	POS	1280	POS	POS	640	POS	POS	640	POS	POS	40	POS	NEG	2	1	2	1	32	5	1	0	16	4	16	4	BP
La_Paz	148.5	POS	10	NEG	NEG	20	POS	NEG	40	POS	NEG	10	NEG	NEG	0.5	-1	0.25	-2	1	0	2	1	2	1	4	2	IN
La_Paz	64.431	POS	40	POS	NEG	40	POS	NEG	10	NEG	NEG	10	NEG	NEG	1	0	4	2	4	2	0.25	-2	4	2	1	0	BP
La_Paz	679.45	POS	320	POS	NEG	160	POS	NEG	160	POS	NEG	10	NEG	NEG	2	1	2	1	32	5	1	0	16	4	16	4	BP
La_Paz	343.29	POS	10	NEG	NEG	10	NEG	NEG	10	NEG	NEG	10	NEG	NEG	1	0	1	0	1	0	1	0	1	0	1	0	NEG
La_Paz	143.16	POS	20	POS	NEG	40	POS	NEG	10	NEG	NEG	10	NEG	NEG	0.5	-1	2	1	2	1	0.25	-2	4	2	1	0	BR
La_Paz	105.42	POS	40	POS	NEG	160	POS	NEG	10	NEG	NEG	10	NEG	NEG	0.25	-2	4	2	4	2	0.0625	-4	16	4	1	0	BR
La_Paz	222.58	POS	160	POS	NEG	40	POS	NEG	80	POS	NEG	10	NEG	NEG	4	2	2	1	16	4	2	1	4	2	8	3	BP
La_Paz	242.56	POS	20	POS	NEG	20	POS	NEG	10	NEG	NEG	10	NEG	NEG	1	0	2	1	2	1	0.5	-1	2	1	1	0	BP
La_Paz	1825.5	POS	640	POS	POS	1280	POS	POS	320	POS	NEG	20	POS	NEG	0.5	-1	2	1	32	5	0.25	-2	64	6	16	4	BR
La_Paz	3623.7	POS	1280	POS	POS	5120	POS	POS	320	POS	NEG	20	POS	NEG	0.25	-2	4	2	64	6	0.0625	-4	256	8	16	4	BR
La_Paz	3.12	NEG	NR	NEG	NEG	NR	NEG	NEG	NR	NEG	NEG	NR	NEG	NEG													NEG_ELISA
La_Paz	1080.5	POS	640	POS	POS	1280	POS	POS	2560	POS	POS	40	POS	NEG	0.5	-1	0.25	-2	16	4	2	1	32	5	64	6	IN
La_Paz	4524.7	POS	5120	POS	POS	2560	POS	POS	2560	POS	POS	80	POS	NEG	2	1	2	1	64	6	1	0	32	5	32	5	BP
La_Paz	384.48	POS	160	POS	NEG	640	POS	POS	20	POS	NEG	10	NEG	NEG	0.25	-2	8	3	16	4	0.03125	-5	64	6	2	1	BR
La_Paz	274.05	POS	160	POS	NEG	320	POS	NEG	80	POS	NEG	10	NEG	NEG	0.5	-1	2	1	16	4	0.25	-2	32	5	8	3	BR
La_Paz	471.1	POS	80	POS	NEG	160	POS	NEG	160	POS	NEG	10	NEG	NEG	0.5	-1	0.5	-1	8	3	1	0	16	4	16	4	BR
[truncated: 2,739 more rows]

## Sheet: 2022
Location	BAU_ELISA	Interpretation_ELISA	Titre_SN_Bavpat	Interpretation_SN20_BAVPAT	Interpretation_SN640_BAVPAT	Titre_SN_Brazil	Interpretation_SN20_Brazil	Interpretation_SN640_Brazil	Titre_SN_India	Interpretation_SN20_India	Interpretation_SN640_India	Titre_SN_Omicron	Interpretation_SN20_Omicron	Interpretation_SN640_Omicron	Ratio_SN_BP_BR	RatioLog2_SN_BP_BR	Ratio_SN_BP_IN	RatioLog2_SN_BP_IN	Ratio_SN_BP_OM	RatioLog2_SN_BP_OM	Ratio_SN_IN_BR	RatioLog2_SN_IN_BR	Ratio_SN_BR_OM	RatioLog2_SN_BR_OM	Ratio_SN_IN_OM	RatioLog2_SN_IN_OM	Interpretation_Variant
La_Paz_T2	5970.9	POS	2560	POS	POS	5120	POS	POS	1280	POS	POS	640	POS	POS	0.5	-1	2	1	4	2	0.25	-2	8	3	2	1	BR
La_Paz_T2	2263.7	POS	10240	POS	POS	1280	POS	POS	1280	POS	POS	320	POS	NEG	8	3	8	3	32	5	1	0	4	2	4	2	BP
La_Paz_T2	1047.1	POS	640	POS	POS	320	POS	NEG	640	POS	POS	40	POS	NEG	2	1	1	0	16	4	2	1	8	3	16	4	BP
La_Paz_T2	1812.1	POS	2560	POS	POS	640	POS	POS	320	POS	NEG	160	POS	NEG	4	2	8	3	16	4	0.5	-1	4	2	2	1	BP
La_Paz_T2	591	POS	1280	POS	POS	320	POS	NEG	160	POS	NEG	160	POS	NEG	4	2	8	3	8	3	0.5	-1	2	1	1	0	BP
La_Paz_T2	3010	POS	1280	POS	POS	2560	POS	POS	640	POS	POS	320	POS	NEG	0.5	-1	2	1	4	2	0.25	-2	8	3	2	1	BR
La_Paz_T2	4480.8	POS	2560	POS	POS	320	POS	NEG	640	POS	POS	320	POS	NEG	8	3	4	2	8	3	2	1	1	0	2	1	BP
La_Paz_T2	969.41	POS	1280	POS	POS	2560	POS	POS	320	POS	NEG	320	POS	NEG	0.5	-1	4	2	4	2	0.125	-3	8	3	1	0	BR
La_Paz_T2	3646	POS	5120	POS	POS	640	POS	POS	640	POS	POS	320	POS	NEG	8	3	8	3	16	4	1	0	2	1	2	1	BP
La_Paz_T2	3339.4	POS	5120	POS	POS	1280	POS	POS	640	POS	POS	160	POS	NEG	4	2	8	3	32	5	0.5	-1	8	3	4	2	BP
La_Paz_T2	1602.2	POS	1280	POS	POS	320	POS	NEG	640	POS	POS	640	POS	POS	4	2	2	1	2	1	2	1	0.5	-1	1	0	BP
La_Paz_T2	75.316	POS	160	POS	NEG	40	POS	NEG	40	POS	NEG	10	NEG	NEG	4	2	4	2	16	4	1	0	4	2	4	2	BP
La_Paz_T2	1924.3	POS	1280	POS	POS	320	POS	NEG	640	POS	POS	320	POS	NEG	4	2	2	1	4	2	2	1	1	0	2	1	BP
La_Paz_T2	1094.1	POS	320	POS	NEG	640	POS	POS	80	POS	NEG	80	POS	NEG	0.5	-1	4	2	4	2	0.125	-3	8	3	1	0	BR
La_Paz_T2	3368.8	POS	1280	POS	POS	320	POS	NEG	320	POS	NEG	160	POS	NEG	4	2	4	2	8	3	1	0	2	1	2	1	BP
La_Paz_T2	3678.6	POS	10240	POS	POS	1280	POS	POS	1280	POS	POS	1280	POS	POS	8	3	8	3	8	3	1	0	1	0	1	0	BP
La_Paz_T2	105.25	POS	40	POS	NEG	10	NEG	NEG	20	POS	NEG	20	POS	NEG	4	2	2	1	2	1	2	1	0.5	-1	1	0	BP
La_Paz_T2	1171.8	POS	1280	POS	POS	320	POS	NEG	640	POS	POS	640	POS	POS	4	2	2	1	2	1	2	1	0.5	-1	1	0	BP
La_Paz_T2	1056.5	POS	1280	POS	POS	320	POS	NEG	320	POS	NEG	640	POS	POS	4	2	4	2	2	1	1	0	0.5	-1	0.5	-1	BP
La_Paz_T2	341.14	POS	320	POS	NEG	160	POS	NEG	160	POS	NEG	160	POS	NEG	2	1	2	1	2	1	1	0	1	0	1	0	BP
La_Paz_T2	1195.3	POS	640	POS	POS	320	POS	NEG	320	POS	NEG	40	POS	NEG	2	1	2	1	16	4	1	0	8	3	8	3	BP
La_Paz_T2	4686.3	POS	2560	POS	POS	5120	POS	POS	640	POS	POS	320	POS	NEG	0.5	-1	4	2	8	3	0.125	-3	16	4	2	1	BR
La_Paz_T2	1386.4	POS	1280	POS	POS	320	POS	NEG	320	POS	NEG	160	POS	NEG	4	2	4	2	8	3	1	0	2	1	2	1	BP
La_Paz_T2	2341.4	POS	1280	POS	POS	1280	POS	POS	320	POS	NEG	160	POS	NEG	1	0	4	2	8	3	0.25	-2	8	3	2	1	BP
La_Paz_T2	257.47	POS	160	POS	NEG	80	POS	NEG	40	POS	NEG	10	NEG	NEG	2	1	4	2	16	4	0.5	-1	8	3	4	2	BP
La_Paz_T2	1277.6	POS	2560	POS	POS	640	POS	POS	320	POS	NEG	80	POS	NEG	4	2	8	3	32	5	0.5	-1	8	3	4	2	BP
La_Paz_T2	6307.2	POS	5120	POS	POS	640	POS	POS	1280	POS	POS	320	POS	NEG	8	3	4	2	16	4	2	1	2	1	4	2	BP
La_Paz_T2	6990.3	POS	5120	POS	POS	10240	POS	POS	1280	POS	POS	1280	POS	POS	0.5	-1	4	2	4	2	0.125	-3	8	3	1	0	BR
La_Paz_T2	792.94	POS	320	POS	NEG	80	POS	NEG	80	POS	NEG	80	POS	NEG	4	2	4	2	4	2	1	0	1	0	1	0	BP
La_Paz_T2	4083	POS	10240	POS	POS	640	POS	POS	1280	POS	POS	320	POS	NEG	16	4	8	3	32	5	2	1	2	1	4	2	BP
La_Paz_T2	4233	POS	5120	POS	POS	1280	POS	POS	640	POS	POS	160	POS	NEG	4	2	8	3	32	5	0.5	-1	8	3	4	2	BP
La_Paz_T2	3270.9	POS	5120	POS	POS	5120	POS	POS	1280	POS	POS	160	POS	NEG	1	0	4	2	32	5	0.25	-2	32	5	8	3	BP
La_Paz_T2	2641.5	POS	2560	POS	POS	640	POS	POS	640	POS	POS	160	POS	NEG	4	2	4	2	16	4	1	0	4	2	4	2	BP
La_Paz_T2	7523.2	POS	10240	POS	POS	2560	POS	POS	1280	POS	POS	1280	POS	POS	4	2	8	3	8	3	0.5	-1	2	1	1	0	BP
La_Paz_T2	2427.7	POS	2560	POS	POS	640	POS	POS	640	POS	POS	640	POS	POS	4	2	4	2	4	2	1	0	1	0	1	0	BP
La_Paz_T2	1268.2	POS	320	POS	NEG	320	POS	NEG	160	POS	NEG	1280	POS	POS	1	0	2	1	0.25	-2	0.5	-1	0.25	-2	0.125	-3	OM
La_Paz_T2	7467.8	POS	2560	POS	POS	2560	POS	POS	640	POS	POS	1280	POS	POS	1	0	4	2	2	1	0.25	-2	2	1	0.5	-1	BP
La_Paz_T2	1311.6	POS	2560	POS	POS	640	POS	POS	320	POS	NEG	160	POS	NEG	4	2	8	3	16	4	0.5	-1	4	2	2	1	BP
La_Paz_T2	3743.8	POS	5120	POS	POS	1280	POS	POS	1280	POS	POS	1280	POS	POS	4	2	4	2	4	2	1	0	1	0	1	0	BP
La_Paz_T2	1230.6	POS	320	POS	NEG	640	POS	POS	160	POS	NEG	320	POS	NEG	0.5	-1	2	1	1	0	0.25	-2	2	1	0.5	-1	BR
La_Paz_T2	1984.7	POS	320	POS	NEG	320	POS	NEG	320	POS	NEG	80	POS	NEG	1	0	1	0	4	2	1	0	4	2	4	2	BP
La_Paz_T2	377.25	POS	80	POS	NEG	160	POS	NEG	80	POS	NEG	40	POS	NEG	0.5	-1	1	0	2	1	0.5	-1	4	2	2	1	BR
La_Paz_T2	1460.4	POS	1280	POS	POS	2560	POS	POS	320	POS	NEG	640	POS	POS	0.5	-1	4	2	2	1	0.125	-3	4	2	0.5	-1	BR
La_Paz_T2	1430.3	POS	320	POS	NEG	320	POS	NEG	320	POS	NEG	640	POS	POS	1	0	1	0	0.5	-1	1	0	0.5	-1	0.5	-1	OM
La_Paz_T2	1643.2	POS	640	POS	POS	320	POS	NEG	320	POS	NEG	160	POS	NEG	2	1	2	1	4	2	1	0	2	1	2	1	BP
La_Paz_T2	1600.6	POS	2560	POS	POS	320	POS	NEG	320	POS	NEG	40	POS	NEG	8	3	8	3	64	6	1	0	8	3	8	3	BP
La_Paz_T2	2064	POS	1280	POS	POS	640	POS	POS	320	POS	NEG	320	POS	NEG	2	1	4	2	4	2	0.5	-1	2	1	1	0	BP
La_Paz_T2	1032	POS	640	POS	POS	160	POS	NEG	160	POS	NEG	160	POS	NEG	4	2	4	2	4	2	1	0	1	0	1	0	BP
La_Paz_T2	1178.8	POS	320	POS	NEG	160	POS	NEG	80	POS	NEG	40	POS	NEG	2	1	4	2	8	3	0.5	-1	4	2	2	1	BP
La_Paz_T2	1358.4	POS	640	POS	POS	1280	POS	POS	160	POS	NEG	80	POS	NEG	0.5	-1	4	2	8	3	0.125	-3	16	4	2	1	BR
La_Paz_T2	221.47	POS	40	POS	NEG	80	POS	NEG	40	POS	NEG	40	POS	NEG	0.5	-1	1	0	1	0	0.5	-1	2	1	1	0	BR
La_Paz_T2	1125.3	POS	640	POS	POS	40	POS	NEG	160	POS	NEG	80	POS	NEG	16	4	4	2	8	3	4	2	0.5	-1	2	1	BP
La_Paz_T2	4942.7	POS	2560	POS	POS	160	POS	NEG	1280	POS	POS	160	POS	NEG	16	4	2	1	16	4	8	3	1	0	8	3	BP
La_Paz_T2	3937.9	POS	10240	POS	POS	640	POS	POS	1280	POS	POS	320	POS	NEG	16	4	8	3	32	5	2	1	2	1	4	2	BP
La_Paz_T2	1256	POS	1280	POS	POS	1280	POS	POS	640	POS	POS	80	POS	NEG	1	0	2	1	16	4	0.5	-1	16	4	8	3	BP
La_Paz_T2	874.67	POS	2560	POS	POS	320	POS	NEG	320	POS	NEG	40	POS	NEG	8	3	8	3	64	6	1	0	8	3	8	3	BP
La_Paz_T2	7295.1	POS	5120	POS	POS	10240	POS	POS	2560	POS	POS	640	POS	POS	0.5	-1	2	1	8	3	0.25	-2	16	4	4	2	BR
La_Paz_T2	72.639	POS	80	POS	NEG	40	POS	NEG	40	POS	NEG	10	NEG	NEG	2	1	2	1	8	3	1	0	4	2	4	2	BP
La_Paz_T2	1295	POS	2560	POS	POS	1280	POS	POS	320	POS	NEG	80	POS	NEG	2	1	8	3	32	5	0.25	-2	16	4	4	2	BP
La_Paz_T2	2282	POS	640	POS	POS	1280	POS	POS	640	POS	POS	320	POS	NEG	0.5	-1	1	0	2	1	0.5	-1	4	2	2	1	BR
La_Paz_T2	159.39	POS	80	POS	NEG	40	POS	NEG	80	POS	NEG	10	NEG	NEG	2	1	1	0	8	3	2	1	4	2	8	3	BP
La_Paz_T2	4011.8	POS	5120	POS	POS	1280	POS	POS	640	POS	POS	1280	POS	POS	4	2	8	3	4	2	0.5	-1	1	0	0.5	-1	BP
La_Paz_T2	170.38	POS	40	POS	NEG	80	POS	NEG	40	POS	NEG	10	NEG	NEG	0.5	-1	1	0	4	2	0.5	-1	8	3	4	2	BR
La_Paz_T2	2925.7	POS	10240	POS	POS	1280	POS	POS	1280	POS	POS	320	POS	NEG	8	3	8	3	32	5	1	0	4	2	4	2	BP
La_Paz_T2	268.33	POS	320	POS	NEG	80	POS	NEG	160	POS	NEG	40	POS	NEG	4	2	2	1	8	3	2	1	2	1	4	2	BP
La_Paz_T2	3154.6	POS	640	POS	POS	5120	POS	POS	640	POS	POS	320	POS	NEG	0.125	-3	1	0	2	1	0.125	-3	16	4	2	1	BR
La_Paz_T2	1936.3	POS	2560	POS	POS	320	POS	NEG	640	POS	POS	40	POS	NEG	8	3	4	2	64	6	2	1	8	3	16	4	BP
La_Paz_T2	794.67	POS	40	POS	NEG	40	POS	NEG	10	NEG	NEG	160	POS	NEG	1	0	4	2	0.25	-2	0.25	-2	0.25	-2	0.0625	-4	OM
La_Paz_T2	4130	POS	10240	POS	POS	5120	POS	POS	1280	POS	POS	320	POS	NEG	2	1	8	3	32	5	0.25	-2	16	4	4	2	BP
La_Paz_T2	2191.8	POS	2560	POS	POS	320	POS	NEG	640	POS	POS	640	POS	POS	8	3	4	2	4	2	2	1	0.5	-1	1	0	BP
La_Paz_T2	93.688	POS	320	POS	NEG	40	POS	NEG	80	POS	NEG	10	NEG	NEG	8	3	4	2	32	5	2	1	4	2	8	3	BP
La_Paz_T2	2547.5	POS	1280	POS	POS	640	POS	POS	320	POS	NEG	80	POS	NEG	2	1	4	2	16	4	0.5	-1	8	3	4	2	BP
La_Paz_T2	938.82	POS	320	POS	NEG	320	POS	NEG	160	POS	NEG	160	POS	NEG	1	0	2	1	2	1	0.5	-1	2	1	1	0	BP
La_Paz_T2	3564.4	POS	2560	POS	POS	1280	POS	POS	640	POS	POS	160	POS	NEG	2	1	4	2	16	4	0.5	-1	8	3	4	2	BP
La_Paz_T2	2197.6	POS	5120	POS	POS	320	POS	NEG	640	POS	POS	160	POS	NEG	16	4	8	3	32	5	2	1	2	1	4	2	BP
La_Paz_T2	1242.4	POS	1280	POS	POS	320	POS	NEG	320	POS	NEG	80	POS	NEG	4	2	4	2	16	4	1	0	4	2	4	2	BP
La_Paz_T2	856.47	POS	40	POS	NEG	10	NEG	NEG	10	NEG	NEG	80	POS	NEG	4	2	4	2	0.5	-1	1	0	0.125	-3	0.125	-3	OM
La_Paz_T2	3251.4	POS	1280	POS	POS	160	POS	NEG	1280	POS	POS	160	POS	NEG	8	3	1	0	8	3	8	3	1	0	8	3	BP
La_Paz_T2	2860	POS	5120	POS	POS	2560	POS	POS	1280	POS	POS	1280	POS	POS	2	1	4	2	4	2	0.5	-1	2	1	1	0	BP
La_Paz_T2	5292.4	POS	2560	POS	POS	640	POS	POS	1280	POS	POS	640	POS	POS	4	2	2	1	4	2	2	1	1	0	2	1	BP
La_Paz_T2	15586	POS	10240	POS	POS	5120	POS	POS	1280	POS	POS	1280	POS	POS	2	1	8	3	8	3	0.25	-2	4	2	1	0	BP
La_Paz_T2	2142.9	POS	1280	POS	POS	2560	POS	POS	320	POS	NEG	160	POS	NEG	0.5	-1	4	2	8	3	0.125	-3	16	4	2	1	BR
La_Paz_T2	1475.6	POS	2560	POS	POS	640	POS	POS	640	POS	POS	320	POS	NEG	4	2	4	2	8	3	1	0	2	1	2	1	BP
La_Paz_T2	832.94	POS	640	POS	POS	640	POS	POS	320	POS	NEG	160	POS	NEG	1	0	2	1	4	2	0.5	-1	4	2	2	1	BP
La_Paz_T2	3150.3	POS	2560	POS	POS	640	POS	POS	640	POS	POS	320	POS	NEG	4	2	4	2	8	3	1	0	2	1	2	1	BP
La_Paz_T2	2967.6	POS	5120	POS	POS	640	POS	POS	1280	POS	POS	320	POS	NEG	8	3	4	2	16	4	2	1	2	1	4	2	BP
La_Paz_T2	355.52	POS	320	POS	NEG	80	POS	NEG	40	POS	NEG	80	POS	NEG	4	2	8	3	4	2	0.5	-1	1	0	0.5	-1	BP
La_Paz_T2	8.8	NEG	10	NEG	NEG	10	NEG	NEG	10	NEG	NEG	10	NEG	NEG	1	0	1	0	1	0	1	0	1	0	1	0	NEG_ELISA
La_Paz_T2	1042.7	POS	1280	POS	POS	1280	POS	POS	160	POS	NEG	160	POS	NEG	1	0	8	3	8	3	0.125	-3	8	3	1	0	BP
La_Paz_T2	1016	POS	320	POS	NEG	640	POS	POS	160	POS	NEG	80	POS	NEG	0.5	-1	2	1	4	2	0.25	-2	8	3	2	1	BR
La_Paz_T2	3830.8	POS	1280	POS	POS	1280	POS	POS	640	POS	POS	640	POS	POS	1	0	2	1	2	1	0.5	-1	2	1	1	0	BP
La_Paz_T2	1472.9	POS	2560	POS	POS	320	POS	NEG	320	POS	NEG	40	POS	NEG	8	3	8	3	64	6	1	0	8	3	8	3	BP
La_Paz_T2	1545.5	POS	1280	POS	POS	640	POS	POS	640	POS	POS	160	POS	NEG	2	1	2	1	8	3	1	0	4	2	4	2	BP
La_Paz_T2	1445.3	POS	1280	POS	POS	320	POS	NEG	160	POS	NEG	80	POS	NEG	4	2	8	3	16	4	0.5	-1	4	2	2	1	BP
La_Paz_T2	1272	POS	2560	POS	POS	320	POS	NEG	320	POS	NEG	80	POS	NEG	8	3	8	3	32	5	1	0	4	2	4	2	BP
La_Paz_T2	2430.8	POS	2560	POS	POS	640	POS	POS	320	POS	NEG	160	POS	NEG	4	2	8	3	16	4	0.5	-1	4	2	2	1	BP
La_Paz_T2	7605.1	POS	10240	POS	POS	5120	POS	POS	1280	POS	POS	2560	POS	POS	2	1	8	3	4	2	0.25	-2	2	1	0.5	-1	BP
La_Paz_T2	91.733	POS	80	POS	NEG	20	POS	NEG	40	POS	NEG	80	POS	NEG	4	2	2	1	1	0	2	1	0.25	-2	0.5	-1	OM
La_Paz_T2	869.33	POS	640	POS	POS	1280	POS	POS	160	POS	NEG	160	POS	NEG	0.5	-1	4	2	4	2	0.125	-3	8	3	1	0	BR
La_Paz_T2	5580.5	POS	1280	POS	POS	2560	POS	POS	1280	POS	POS	640	POS	POS	0.5	-1	1	0	2	1	0.5	-1	4	2	2	1	BR
La_Paz_T2	11864	POS	20480	POS	POS	5120	POS	POS	2560	POS	POS	320	POS	NEG	4	2	8	3	64	6	0.5	-1	16	4	8	3	BP
La_Paz_T2	5136.4	POS	640	POS	POS	5120	POS	POS	320	POS	NEG	320	POS	NEG	0.125	-3	2	1	2	1	0.0625	-4	16	4	1	0	BR
La_Paz_T2	361.39	POS	320	POS	NEG	160	POS	NEG	40	POS	NEG	10	NEG	NEG	2	1	8	3	32	5	0.25	-2	16	4	4	2	BP
La_Paz_T2	45.714	POS	80	POS	NEG	40	POS	NEG	20	POS	NEG	10	NEG	NEG	2	1	4	2	8	3	0.5	-1	4	2	2	1	BP
La_Paz_T2	1400.2	POS	320	POS	NEG	160	POS	NEG	160	POS	NEG	40	POS	NEG	2	1	2	1	8	3	1	0	4	2	4	2	BP
La_Paz_T2	1813.5	POS	320	POS	NEG	640	POS	POS	80	POS	NEG	40	POS	NEG	0.5	-1	4	2	8	3	0.125	-3	16	4	2	1	BR
La_Paz_T2	2384.7	POS	640	POS	POS	320	POS	NEG	320	POS	NEG	80	POS	NEG	2	1	2	1	8	3	1	0	4	2	4	2	BP
La_Paz_T2	286	POS	1280	POS	POS	80	POS	NEG	160	POS	NEG	20	POS	NEG	16	4	8	3	64	6	2	1	4	2	8	3	BP
La_Paz_T2	123.36	POS	160	POS	NEG	160	POS	NEG	80	POS	NEG	40	POS	NEG	1	0	2	1	4	2	0.5	-1	4	2	2	1	BP
La_Paz_T2	2026.5	POS	320	POS	NEG	320	POS	NEG	320	POS	NEG	80	POS	NEG	1	0	1	0	4	2	1	0	4	2	4	2	BP
La_Paz_T2	1643.2	POS	640	POS	POS	320	POS	NEG	320	POS	NEG	160	POS	NEG	2	1	2	1	4	2	1	0	2	1	2	1	BP
La_Paz_T2	3208.7	POS	2560	POS	POS	1280	POS	POS	320	POS	NEG	320	POS	NEG	2	1	8	3	8	3	0.25	-2	4	2	1	0	BP
La_Paz_T2	2519.9	POS	1280	POS	POS	1280	POS	POS	640	POS	POS	320	POS	NEG	1	0	2	1	4	2	0.5	-1	4	2	2	1	BP
La_Paz_T2	7323.7	POS	2560	POS	POS	640	POS	POS	320	POS	NEG	160	POS	NEG	4	2	8	3	16	4	0.5	-1	4	2	2	1	BP
La_Paz_T2	2571.1	POS	1280	POS	POS	80	POS	NEG	160	POS	NEG	80	POS	NEG	16	4	8	3	16	4	2	1	1	0	2	1	BP
La_Paz_T2	1397.7	POS	640	POS	POS	320	POS	NEG	320	POS	NEG	20	POS	NEG	2	1	2	1	32	5	1	0	16	4	16	4	BP
La_Paz_T2	1240	POS	320	POS	NEG	160	POS	NEG	160	POS	NEG	160	POS	NEG	2	1	2	1	2	1	1	0	1	0	1	0	BP
La_Paz_T2	1290	POS	1280	POS	POS	80	POS	NEG	160	POS	NEG	40	POS	NEG	16	4	8	3	32	5	2	1	2	1	4	2	BP
La_Paz_T2	4244.5	POS	1280	POS	POS	1280	POS	POS	1280	POS	POS	640	POS	POS	1	0	1	0	2	1	1	0	2	1	2	1	BP
La_Paz_T2	6053	POS	10240	POS	POS	1280	POS	POS	1280	POS	POS	320	POS	NEG	8	3	8	3	32	5	1	0	4	2	4	2	BP
La_Paz_T2	5105.2	POS	10240	POS	POS	640	POS	POS	1280	POS	POS	320	POS	NEG	16	4	8	3	32	5	2	1	2	1	4	2	BP
La_Paz_T2	3575.9	POS	2560	POS	POS	320	POS	NEG	320	POS	NEG	640	POS	POS	8	3	8	3	4	2	1	0	0.5	-1	0.5	-1	BP
La_Paz_T2	2239.4	POS	2560	POS	POS	160	POS	NEG	320	POS	NEG	80	POS	NEG	16	4	8	3	32	5	2	1	2	1	4	2	BP
La_Paz_T2	1520.5	POS	320	POS	NEG	320	POS	NEG	320	POS	NEG	160	POS	NEG	1	0	1	0	2	1	1	0	2	1	2	1	BP
La_Paz_T2	279.3	POS	40	POS	NEG	80	POS	NEG	20	POS	NEG	20	POS	NEG	0.5	-1	2	1	2	1	0.25	-2	4	2	1	0	BR
La_Paz_T2	765.33	POS	320	POS	NEG	80	POS	NEG	80	POS	NEG	80	POS	NEG	4	2	4	2	4	2	1	0	1	0	1	0	BP
La_Paz_T2	334.26	POS	160	POS	NEG	160	POS	NEG	80	POS	NEG	10	NEG	NEG	1	0	2	1	16	4	0.5	-1	16	4	8	3	BP
La_Paz_T2	4571.7	POS	5120	POS	POS	2560	POS	POS	640	POS	POS	2560	POS	POS	2	1	8	3	2	1	0.25	-2	1	0	0.25	-2	BP
La_Paz_T2	2051.5	POS	2560	POS	POS	320	POS	NEG	320	POS	NEG	320	POS	NEG	8	3	8	3	8	3	1	0	1	0	1	0	BP
La_Paz_T2	366.26	POS	160	POS	NEG	40	POS	NEG	80	POS	NEG	20	POS	NEG	4	2	2	1	8	3	2	1	2	1	4	2	BP
La_Paz_T2	7581.7	POS	5120	POS	POS	640	POS	POS	2560	POS	POS	320	POS	NEG	8	3	2	1	16	4	4	2	2	1	8	3	BP
La_Paz_T2	1482.9	POS	640	POS	POS	160	POS	NEG	320	POS	NEG	20	POS	NEG	4	2	2	1	32	5	2	1	8	3	16	4	BP
La_Paz_T2	1768.5	POS	1280	POS	POS	320	POS	NEG	320	POS	NEG	40	POS	NEG	4	2	4	2	32	5	1	0	8	3	8	3	BP
La_Paz_T2	619.86	POS	320	POS	NEG	160	POS	NEG	160	POS	NEG	40	POS	NEG	2	1	2	1	8	3	1	0	4	2	4	2	BP
La_Paz_T2	7021	POS	5120	POS	POS	640	POS	POS	640	POS	POS	80	POS	NEG	8	3	8	3	64	6	1	0	8	3	8	3	BP
La_Paz_T2	4911.5	POS	5120	POS	POS	640	POS	POS	1280	POS	POS	160	POS	NEG	8	3	4	2	32	5	2	1	4	2	8	3	BP
La_Paz_T2	2224.3	POS	1280	POS	POS	2560	POS	POS	640	POS	POS	320	POS	NEG	0.5	-1	2	1	4	2	0.25	-2	8	3	2	1	BR
La_Paz_T2	688	POS	320	POS	NEG	80	POS	NEG	160	POS	NEG	20	POS	NEG	4	2	2	1	16	4	2	1	4	2	8	3	BP
La_Paz_T2	19550	POS	5120	POS	POS	10240	POS	POS	5120	POS	POS	640	POS	POS	0.5	-1	1	0	8	3	0.5	-1	16	4	8	3	BR
La_Paz_T2	1106.7	POS	160	POS	NEG	80	POS	NEG	640	POS	POS	40	POS	NEG	2	1	0.25	-2	4	2	8	3	2	1	16	4	IN
La_Paz_T2	2119.1	POS	2560	POS	POS	320	POS	NEG	320	POS	NEG	80	POS	NEG	8	3	8	3	32	5	1	0	4	2	4	2	BP
La_Paz_T2	8190.1	POS	2560	POS	POS	5120	POS	POS	2560	POS	POS	640	POS	POS	0.5	-1	1	0	4	2	0.5	-1	8	3	4	2	BR
La_Paz_T2	23.102	NEG	10	NEG	NEG	10	NEG	NEG	10	NEG	NEG	10	NEG	NEG	1	0	1	0	1	0	1	0	1	0	1	0	NEG_ELISA
La_Paz_T2	1529.1	POS	640	POS	POS	640	POS	POS	320	POS	NEG	640	POS	POS	1	0	2	1	1	0	0.5	-1	1	0	0.5	-1	OM
La_Paz_T2	2504.9	POS	5120	POS	POS	320	POS	NEG	640	POS	POS	80	POS	NEG	16	4	8	3	64	6	2	1	4	2	8	3	BP
La_Paz_T2	874.67	POS	80	POS	NEG	80	POS	NEG	40	POS	NEG	10	NEG	NEG	1	0	2	1	8	3	0.5	-1	8	3	4	2	BP
La_Paz_T2	3575.9	POS	2560	POS	POS	640	POS	POS	320	POS	NEG	80	POS	NEG	4	2	8	3	32	5	0.5	-1	8	3	4	2	BP
La_Paz_T2	257.39	POS	160	POS	NEG	160	POS	NEG	80	POS	NEG	10	NEG	NEG	1	0	2	1	16	4	0.5	-1	16	4	8	3	BP
La_Paz_T2	3066.1	POS	2560	POS	POS	1280	POS	POS	1280	POS	POS	160	POS	NEG	2	1	2	1	16	4	1	0	8	3	8	3	BP
La_Paz_T2	1064	POS	1280	POS	POS	320	POS	NEG	320	POS	NEG	80	POS	NEG	4	2	4	2	16	4	1	0	4	2	4	2	BP
La_Paz_T2	2221	POS	640	POS	POS	1280	POS	POS	320	POS	NEG	160	POS	NEG	0.5	-1	2	1	4	2	0.25	-2	8	3	2	1	BR
La_Paz_T2	3150.8	POS	1280	POS	POS	640	POS	POS	1280	POS	POS	640	POS	POS	2	1	1	0	2	1	2	1	1	0	2	1	BP
La_Paz_T2	11068	POS	20480	POS	POS	5120	POS	POS	2560	POS	POS	1280	POS	POS	4	2	8	3	16	4	0.5	-1	4	2	2	1	BP
La_Paz_T2	856	POS	640	POS	POS	320	POS	NEG	160	POS	NEG	20	POS	NEG	2	1	4	2	32	5	0.5	-1	16	4	8	3	BP
La_Paz_T2	1005.3	POS	320	POS	NEG	80	POS	NEG	80	POS	NEG	10	NEG	NEG	4	2	4	2	32	5	1	0	8	3	8	3	BP
La_Paz_T2	4185.4	POS	1280	POS	POS	640	POS	POS	640	POS	POS	80	POS	NEG	2	1	2	1	16	4	1	0	8	3	8	3	BP
La_Paz_T2	7932.7	POS	2560	POS	POS	1280	POS	POS	1280	POS	POS	160	POS	NEG	2	1	2	1	16	4	1	0	8	3	8	3	BP
La_Paz_T2	172.77	POS	160	POS	NEG	40	POS	NEG	80	POS	NEG	40	POS	NEG	4	2	2	1	4	2	2	1	1	0	2	1	BP
La_Paz_T2	1501.4	POS	2560	POS	POS	320	POS	NEG	1280	POS	POS	40	POS	NEG	8	3	2	1	64	6	4	2	8	3	32	5	BP
La_Paz_T2	1469.1	POS	1280	POS	POS	160	POS	NEG	160	POS	NEG	80	POS	NEG	8	3	8	3	16	4	1	0	2	1	2	1	BP
La_Paz_T2	605.76	POS	160	POS	NEG	40	POS	NEG	40	POS	NEG	80	POS	NEG	4	2	4	2	2	1	1	0	0.5	-1	0.5	-1	BP
La_Paz_T2	24151	POS	10240	POS	POS	20480	POS	POS	2560	POS	POS	2560	POS	POS	0.5	-1	4	2	4	2	0.125	-3	8	3	1	0	BR
La_Paz_T2	2656	POS	5120	POS	POS	640	POS	POS	640	POS	POS	320	POS	NEG	8	3	8	3	16	4	1	0	2	1	2	1	BP
La_Paz_T2	981.33	POS	640	POS	POS	640	POS	POS	160	POS	NEG	80	POS	NEG	1	0	4	2	8	3	0.25	-2	8	3	2	1	BP
La_Paz_T2	1863.6	POS	640	POS	POS	160	POS	NEG	640	POS	POS	80	POS	NEG	4	2	1	0	8	3	4	2	2	1	8	3	BP
La_Paz_T2	4717.3	POS	2560	POS	POS	2560	POS	POS	20480	POS	POS	40	POS	NEG	1	0	0.125	-3	64	6	8	3	64	6	512	9	IN
La_Paz_T2	2036.5	POS	1280	POS	POS	320	POS	NEG	10240	POS	POS	160	POS	NEG	4	2	0.125	-3	8	3	32	5	2	1	64	6	IN
La_Paz_T2	2313.2	POS	640	POS	POS	2560	POS	POS	640	POS	POS	320	POS	NEG	0.25	-2	1	0	2	1	0.25	-2	8	3	2	1	BR
La_Paz_T2	13405	POS	10240	POS	POS	1280	POS	POS	2560	POS	POS	1280	POS	POS	8	3	4	2	8	3	2	1	1	0	2	1	BP
La_Paz_T2	1103.5	POS	1280	POS	POS	160	POS	NEG	320	POS	NEG	160	POS	NEG	8	3	4	2	8	3	2	1	1	0	2	1	BP
La_Paz_T2	6181.1	POS	10240	POS	POS	5120	POS	POS	1280	POS	POS	1280	POS	POS	2	1	8	3	8	3	0.25	-2	4	2	1	0	BP
La_Paz_T2	15268	POS	20480	POS	POS	5120	POS	POS	2560	POS	POS	2560	POS	POS	4	2	8	3	8	3	0.5	-1	2	1	1	0	BP
La_Paz_T2	3779.7	POS	5120	POS	POS	1280	POS	POS	1280	POS	POS	1280	POS	POS	4	2	4	2	4	2	1	0	1	0	1	0	BP
La_Paz_T2	3994.9	POS	2560	POS	POS	5120	POS	POS	640	POS	POS	640	POS	POS	0.5	-1	4	2	4	2	0.125	-3	8	3	1	0	BR
La_Paz_T2	2209.1	POS	320	POS	NEG	320	POS	NEG	160	POS	NEG	40	POS	NEG	1	0	2	1	8	3	0.5	-1	8	3	4	2	BP
La_Paz_T2	3936.2	POS	5120	POS	POS	1280	POS	POS	1280	POS	POS	5120	POS	POS	4	2	4	2	1	0	1	0	0.25	-2	0.25	-2	OM
La_Paz_T2	2322.5	POS	5120	POS	POS	320	POS	NEG	640	POS	POS	160	POS	NEG	16	4	8	3	32	5	2	1	2	1	4	2	BP
La_Paz_T2	1545.2	POS	320	POS	NEG	160	POS	NEG	160	POS	NEG	80	POS	NEG	2	1	2	1	4	2	1	0	2	1	2	1	BP
La_Paz_T2	1172.2	POS	320	POS	NEG	80	POS	NEG	160	POS	NEG	80	POS	NEG	4	2	2	1	4	2	2	1	1	0	2	1	BP
La_Paz_T2	29.617	DOU	40	POS	NEG	20	POS	NEG	20	POS	NEG	10	NEG	NEG	2	1	2	1	4	2	1	0	2	1	2	1	BP
La_Paz_T2	3015.6	POS	5120	POS	POS	640	POS	POS	640	POS	POS	80	POS	NEG	8	3	8	3	64	6	1	0	8	3	8	3	BP
La_Paz_T2	913.96	POS	640	POS	POS	320	POS	NEG	160	POS	NEG	160	POS	NEG	2	1	4	2	4	2	0.5	-1	2	1	1	0	BP
La_Paz_T2	1205.9	POS	160	POS	NEG	40	POS	NEG	40	POS	NEG	40	POS	NEG	4	2	4	2	4	2	1	0	1	0	1	0	BP
La_Paz_T2	4216.5	POS	10240	POS	POS	640	POS	POS	1280	POS	POS	640	POS	POS	16	4	8	3	16	4	2	1	1	0	2	1	BP
La_Paz_T2	4818.8	POS	10240	POS	POS	1280	POS	POS	1280	POS	POS	320	POS	NEG	8	3	8	3	32	5	1	0	4	2	4	2	BP
La_Paz_T2	1487.6	POS	1280	POS	POS	320	POS	NEG	320	POS	NEG	80	POS	NEG	4	2	4	2	16	4	1	0	4	2	4	2	BP
La_Paz_T2	1951.1	POS	5120	POS	POS	640	POS	POS	640	POS	POS	320	POS	NEG	8	3	8	3	16	4	1	0	2	1	2	1	BP
La_Paz_T2	3625.7	POS	10240	POS	POS	640	POS	POS	1280	POS	POS	1280	POS	POS	16	4	8	3	8	3	2	1	0.5	-1	1	0	BP
La_Paz_T2	1877.3	POS	1280	POS	POS	640	POS	POS	640	POS	POS	160	POS	NEG	2	1	2	1	8	3	1	0	4	2	4	2	BP
La_Paz_T2	1616.7	POS	1280	POS	POS	320	POS	NEG	320	POS	NEG	40	POS	NEG	4	2	4	2	32	5	1	0	8	3	8	3	BP
La_Paz_T2	1939.6	POS	5120	POS	POS	1280	POS	POS	640	POS	POS	160	POS	NEG	4	2	8	3	32	5	0.5	-1	8	3	4	2	BP
La_Paz_T2	1833.5	POS	1280	POS	POS	320	POS	NEG	160	POS	NEG	20	POS	NEG	4	2	8	3	64	6	0.5	-1	16	4	8	3	BP
La_Paz_T2	11174	POS	20480	POS	POS	5120	POS	POS	2560	POS	POS	2560	POS	POS	4	2	8	3	8	3	0.5	-1	2	1	1	0	BP
La_Paz_T2	3023.3	POS	2560	POS	POS	640	POS	POS	320	POS	NEG	40	POS	NEG	4	2	8	3	64	6	0.5	-1	16	4	8	3	BP
La_Paz_T2	1623.6	POS	1280	POS	POS	640	POS	POS	320	POS	NEG	160	POS	NEG	2	1	4	2	8	3	0.5	-1	4	2	2	1	BP
La_Paz_T2	239.19	POS	320	POS	NEG	80	POS	NEG	160	POS	NEG	10	NEG	NEG	4	2	2	1	32	5	2	1	8	3	16	4	BP
La_Paz_T2	4201	POS	2560	POS	POS	640	POS	POS	640	POS	POS	160	POS	NEG	4	2	4	2	16	4	1	0	4	2	4	2	BP
La_Paz_T2	1510.6	POS	1280	POS	POS	640	POS	POS	320	POS	NEG	160	POS	NEG	2	1	4	2	8	3	0.5	-1	4	2	2	1	BP
La_Paz_T2	4112.2	POS	2560	POS	POS	1280	POS	POS	640	POS	POS	320	POS	NEG	2	1	4	2	8	3	0.5	-1	4	2	2	1	BP
La_Paz_T2	3475.1	POS	5120	POS	POS	2560	POS	POS	640	POS	POS	640	POS	POS	2	1	8	3	8	3	0.25	-2	4	2	1	0	BP
La_Paz_T2	164.16	POS	40	POS	NEG	10	NEG	NEG	10	NEG	NEG	10	NEG	NEG	4	2	4	2	4	2	1	0	1	0	1	0	BP
La_Paz_T2	810.67	POS	160	POS	NEG	40	POS	NEG	320	POS	NEG	10	NEG	NEG	4	2	0.5	-1	16	4	8	3	4	2	32	5	IN
La_Paz_T2	252.75	POS	320	POS	NEG	80	POS	NEG	160	POS	NEG	10	NEG	NEG	4	2	2	1	32	5	2	1	8	3	16	4	BP
La_Paz_T2	3034.9	POS	2560	POS	POS	5120	POS	POS	320	POS	NEG	320	POS	NEG	0.5	-1	8	3	8	3	0.0625	-4	16	4	1	0	BR
La_Paz_T2	6974.4	POS	5120	POS	POS	640	POS	POS	1280	POS	POS	320	POS	NEG	8	3	4	2	16	4	2	1	2	1	4	2	BP
La_Paz_T2	2188.7	POS	5120	POS	POS	640	POS	POS	640	POS	POS	320	POS	NEG	8	3	8	3	16	4	1	0	2	1	2	1	BP
La_Paz_T2	10320	POS	20480	POS	POS	2560	POS	POS	2560	POS	POS	1280	POS	POS	8	3	8	3	16	4	1	0	2	1	2	1	BP
La_Paz_T2	1129.5	POS	2560	POS	POS	640	POS	POS	640	POS	POS	80	POS	NEG	4	2	4	2	32	5	1	0	8	3	8	3	BP
La_Paz_T2	3355.4	POS	2560	POS	POS	640	POS	POS	640	POS	POS	640	POS	POS	4	2	4	2	4	2	1	0	1	0	1	0	BP
La_Paz_T2	1328.4	POS	320	POS	NEG	80	POS	NEG	80	POS	NEG	10	NEG	NEG	4	2	4	2	32	5	1	0	8	3	8	3	BP
La_Paz_T2	2244	POS	640	POS	POS	1280	POS	POS	320	POS	NEG	320	POS	NEG	0.5	-1	2	1	2	1	0.25	-2	4	2	1	0	BR
La_Paz_T2	2140.3	POS	320	POS	NEG	640	POS	POS	80	POS	NEG	80	POS	NEG	0.5	-1	4	2	4	2	0.125	-3	8	3	1	0	BR
La_Paz_T2	907.23	POS	640	POS	POS	160	POS	NEG	160	POS	NEG	40	POS	NEG	4	2	4	2	16	4	1	0	4	2	4	2	BP
La_Paz_T2	205.56	POS	320	POS	NEG	80	POS	NEG	80	POS	NEG	10	NEG	NEG	4	2	4	2	32	5	1	0	8	3	8	3	BP
La_Paz_T2	2594.8	POS	2560	POS	POS	320	POS	NEG	640	POS	POS	320	POS	NEG	8	3	4	2	8	3	2	1	1	0	2	1	BP
La_Paz_T2	4158.6	POS	10240	POS	POS	1280	POS	POS	1280	POS	POS	160	POS	NEG	8	3	8	3	64	6	1	0	8	3	8	3	BP
La_Paz_T2	1115.3	POS	640	POS	POS	640	POS	POS	320	POS	NEG	40	POS	NEG	1	0	2	1	16	4	0.5	-1	16	4	8	3	BP
La_Paz_T2	281.6	POS	640	POS	POS	160	POS	NEG	80	POS	NEG	160	POS	NEG	4	2	8	3	4	2	0.5	-1	1	0	0.5	-1	BP
La_Paz_T2	2551.4	POS	5120	POS	POS	640	POS	POS	640	POS	POS	640	POS	POS	8	3	8	3	8	3	1	0	1	0	1	0	BP
La_Paz_T2	877.65	POS	160	POS	NEG	640	POS	POS	80	POS	NEG	160	POS	NEG	0.25	-2	2	1	1	0	0.125	-3	4	2	0.5	-1	BR
La_Paz_T2	1084.7	POS	80	POS	NEG	160	POS	NEG	80	POS	NEG	160	POS	NEG	0.5	-1	1	0	0.5	-1	0.5	-1	1	0	0.5	-1	OM
La_Paz_T2	4895	POS	5120	POS	POS	1280	POS	POS	640	POS	POS	320	POS	NEG	4	2	8	3	16	4	0.5	-1	4	2	2	1	BP
La_Paz_T2	47903	POS	20480	POS	POS	10240	POS	POS	5120	POS	POS	20480	POS	POS	2	1	4	2	1	0	0.5	-1	0.5	-1	0.25	-2	OM
La_Paz_T2	1800.6	POS	640	POS	POS	160	POS	NEG	320	POS	NEG	80	POS	NEG	4	2	2	1	8	3	2	1	2	1	4	2	BP
La_Paz_T2	6056.7	POS	20480	POS	POS	1280	POS	POS	2560	POS	POS	1280	POS	POS	16	4	8	3	16	4	2	1	1	0	2	1	BP
La_Paz_T2	316.1	POS	320	POS	NEG	160	POS	NEG	80	POS	NEG	160	POS	NEG	2	1	4	2	2	1	0.5	-1	1	0	0.5	-1	BP
La_Paz_T2	2071.1	POS	5120	POS	POS	320	POS	NEG	640	POS	POS	80	POS	NEG	16	4	8	3	64	6	2	1	4	2	8	3	BP
La_Paz_T2	1381.5	POS	1280	POS	POS	320	POS	NEG	160	POS	NEG	80	POS	NEG	4	2	8	3	16	4	0.5	-1	4	2	2	1	BP
La_Paz_T2	866.81	POS	1280	POS	POS	80	POS	NEG	160	POS	NEG	40	POS	NEG	16	4	8	3	32	5	2	1	2	1	4	2	BP
La_Paz_T2	693.89	POS	640	POS	POS	320	POS	NEG	160	POS	NEG	20	POS	NEG	2	1	4	2	32	5	0.5	-1	16	4	8	3	BP
La_Paz_T2	6373.8	POS	10240	POS	POS	2560	POS	POS	1280	POS	POS	160	POS	NEG	4	2	8	3	64	6	0.5	-1	16	4	8	3	BP
La_Paz_T2	21.572	NEG	10	NEG	NEG	10	NEG	NEG	10	NEG	NEG	10	NEG	NEG	1	0	1	0	1	0	1	0	1	0	1	0	NEG_ELISA
La_Paz_T2	6729.5	POS	5120	POS	POS	1280	POS	POS	2560	POS	POS	640	POS	POS	4	2	2	1	8	3	2	1	2	1	4	2	BP
La_Paz_T2	19120	POS	20480	POS	POS	10240	POS	POS	5120	POS	POS	1280	POS	POS	2	1	4	2	16	4	0.5	-1	8	3	4	2	BP
La_Paz_T2	329.83	POS	160	POS	NEG	160	POS	NEG	40	POS	NEG	20	POS	NEG	1	0	4	2	8	3	0.25	-2	8	3	2	1	BP
La_Paz_T2	5388.2	POS	5120	POS	POS	1280	POS	POS	640	POS	POS	80	POS	NEG	4	2	8	3	64	6	0.5	-1	16	4	8	3	BP
La_Paz_T2	1012.8	POS	2560	POS	POS	640	POS	POS	320	POS	NEG	160	POS	NEG	4	2	8	3	16	4	0.5	-1	4	2	2	1	BP
La_Paz_T2	2799.4	POS	640	POS	POS	320	POS	NEG	80	POS	NEG	40	POS	NEG	2	1	8	3	16	4	0.25	-2	8	3	2	1	BP
La_Paz_T2	6572	POS	10240	POS	POS	1280	POS	POS	1280	POS	POS	320	POS	NEG	8	3	8	3	32	5	1	0	4	2	4	2	BP
La_Paz_T2	2507	POS	5120	POS	POS	640	POS	POS	640	POS	POS	160	POS	NEG	8	3	8	3	32	5	1	0	4	2	4	2	BP
La_Paz_T2	1188.2	POS	640	POS	POS	320	POS	NEG	160	POS	NEG	40	POS	NEG	2	1	4	2	16	4	0.5	-1	8	3	4	2	BP
La_Paz_T2	5767.3	POS	1280	POS	POS	2560	POS	POS	640	POS	POS	160	POS	NEG	0.5	-1	2	1	8	3	0.25	-2	16	4	4	2	BR
La_Paz_T2	2096.9	POS	2560	POS	POS	640	POS	POS	320	POS	NEG	80	POS	NEG	4	2	8	3	32	5	0.5	-1	8	3	4	2	BP
La_Paz_T2	13262	POS	20480	POS	POS	5120	POS	POS	2560	POS	POS	2560	POS	POS	4	2	8	3	8	3	0.5	-1	2	1	1	0	BP
La_Paz_T2	7467.8	POS	2560	POS	POS	2560	POS	POS	640	POS	POS	320	POS	NEG	1	0	4	2	8	3	0.25	-2	8	3	2	1	BP
La_Paz_T2	1806.4	POS	640	POS	POS	1280	POS	POS	640	POS	POS	320	POS	NEG	0.5	-1	1	0	2	1	0.5	-1	4	2	2	1	BR
La_Paz_T2	1002.4	POS	1280	POS	POS	320	POS	NEG	160	POS	NEG	40	POS	NEG	4	2	8	3	32	5	0.5	-1	8	3	4	2	BP
La_Paz_T2	303.49	POS	320	POS	NEG	640	POS	POS	80	POS	NEG	160	POS	NEG	0.5	-1	4	2	2	1	0.125	-3	4	2	0.5	-1	BR
La_Paz_T2	757.65	POS	40	POS	NEG	320	POS	NEG	40	POS	NEG	80	POS	NEG	0.125	-3	1	0	0.5	-1	0.125	-3	4	2	0.5	-1	BR
La_Paz_T2	3776.9	POS	320	POS	NEG	160	POS	NEG	160	POS	NEG	40	POS	NEG	2	1	2	1	8	3	1	0	4	2	4	2	BP
La_Paz_T2	1091.4	POS	320	POS	NEG	320	POS	NEG	320	POS	NEG	80	POS	NEG	1	0	1	0	4	2	1	0	4	2	4	2	BP
La_Paz_T2	3872.8	POS	640	POS	POS	1280	POS	POS	320	POS	NEG	640	POS	POS	0.5	-1	2	1	1	0	0.25	-2	2	1	0.5	-1	BR
La_Paz_T2	231.23	POS	20	POS	NEG	40	POS	NEG	10	NEG	NEG	20	POS	NEG	0.5	-1	2	1	1	0	0.25	-2	2	1	0.5	-1	BR
La_Paz_T2	1277.8	POS	1280	POS	POS	2560	POS	POS	160	POS	NEG	160	POS	NEG	0.5	-1	8	3	8	3	0.0625	-4	16	4	1	0	BR
La_Paz_T2	1296.1	POS	1280	POS	POS	160	POS	NEG	160	POS	NEG	80	POS	NEG	8	3	8	3	16	4	1	0	2	1	2	1	BP
La_Paz_T2	1152	POS	640	POS	POS	160	POS	NEG	160	POS	NEG	160	POS	NEG	4	2	4	2	4	2	1	0	1	0	1	0	BP
La_Paz_T2	1797.8	POS	1280	POS	POS	1280	POS	POS	640	POS	POS	640	POS	POS	1	0	2	1	2	1	0.5	-1	2	1	1	0	BP
La_Paz_T2	1924.3	POS	1280	POS	POS	2560	POS	POS	320	POS	NEG	640	POS	POS	0.5	-1	4	2	2	1	0.125	-3	4	2	0.5	-1	BR
La_Paz_T2	1429.9	POS	10240	POS	POS	320	POS	NEG	1280	POS	POS	80	POS	NEG	32	5	8	3	128	7	4	2	4	2	16	4	BP
La_Paz_T2	1096.5	POS	40	POS	NEG	20	POS	NEG	20	POS	NEG	320	POS	NEG	2	1	2	1	0.125	-3	1	0	0.0625	-4	0.0625	-4	OM
La_Paz_T2	188.93	POS	40	POS	NEG	160	POS	NEG	40	POS	NEG	80	POS	NEG	0.25	-2	1	0	0.5	-1	0.25	-2	2	1	0.5	-1	BR
La_Paz_T2	304.97	POS	40	POS	NEG	40	POS	NEG	40	POS	NEG	40	POS	NEG	1	0	1	0	1	0	1	0	1	0	1	0	OM
La_Paz_T2	337.62	POS	40	POS	NEG	80	POS	NEG	80	POS	NEG	20	POS	NEG	0.5	-1	0.5	-1	2	1	1	0	4	2	4	2	BR
La_Paz_T2	10226	POS	5120	POS	POS	2560	POS	POS	2560	POS	POS	320	POS	NEG	2	1	2	1	16	4	1	0	8	3	8	3	BP
CBBA_T2	2311.1	POS	320	POS	NEG	20480	POS	POS	320	POS	NEG	640	POS	POS	0.015625	-6	1	0	0.5	-1	0.015625	-6	32	5	0.5	-1	BR
CBBA_T2	337.97	POS	80	POS	NEG	1280	POS	POS	160	POS	NEG	40	POS	NEG	0.0625	-4	0.5	-1	2	1	0.125	-3	32	5	4	2	BR
CBBA_T2	37.415	POS	40	POS	NEG	40	POS	NEG	20	POS	NEG	80	POS	NEG	1	0	2	1	0.5	-1	0.5	-1	0.5	-1	0.25	-2	OM
CBBA_T2	1329.2	POS	80	POS	NEG	2560	POS	POS	80	POS	NEG	80	POS	NEG	0.03125	-5	1	0	1	0	0.03125	-5	32	5	1	0	BR
CBBA_T2	2438.1	POS	320	POS	NEG	5120	POS	POS	320	POS	NEG	80	POS	NEG	0.0625	-4	1	0	4	2	0.0625	-4	64	6	4	2	BR
CBBA_T2	1653.7	POS	320	POS	NEG	2560	POS	POS	160	POS	NEG	40	POS	NEG	0.125	-3	2	1	8	3	0.0625	-4	64	6	4	2	BR
CBBA_T2	4224.9	POS	640	POS	POS	5120	POS	POS	320	POS	NEG	80	POS	NEG	0.125	-3	2	1	8	3	0.0625	-4	64	6	4	2	BR
CBBA_T2	1873	POS	640	POS	POS	640	POS	POS	320	POS	NEG	160	POS	NEG	1	0	2	1	4	2	0.5	-1	4	2	2	1	BP
CBBA_T2	3470.8	POS	640	POS	POS	20480	POS	POS	640	POS	POS	1280	POS	POS	0.03125	-5	1	0	0.5	-1	0.03125	-5	16	4	0.5	-1	BR
CBBA_T2	6173.7	POS	5120	POS	POS	10240	POS	POS	1280	POS	POS	320	POS	NEG	0.5	-1	4	2	16	4	0.125	-3	32	5	4	2	BR
CBBA_T2	3951.2	POS	5120	POS	POS	10240	POS	POS	640	POS	POS	640	POS	POS	0.5	-1	8	3	8	3	0.0625	-4	16	4	1	0	BR
CBBA_T2	263.88	POS	160	POS	NEG	640	POS	POS	80	POS	NEG	10	NEG	NEG	0.25	-2	2	1	16	4	0.125	-3	64	6	8	3	BR
CBBA_T2	249.47	POS	160	POS	NEG	320	POS	NEG	160	POS	NEG	40	POS	NEG	0.5	-1	1	0	4	2	0.5	-1	8	3	4	2	BR
CBBA_T2	2796.7	POS	640	POS	POS	2560	POS	POS	640	POS	POS	20	POS	NEG	0.25	-2	1	0	32	5	0.25	-2	128	7	32	5	BR
CBBA_T2	12.243	NEG	10	NEG	NEG	10	NEG	NEG	10	NEG	NEG	10	NEG	NEG	1	0	1	0	1	0	1	0	1	0	1	0	NEG_ELISA
CBBA_T2	1009.2	POS	320	POS	NEG	160	POS	NEG	80	POS	NEG	80	POS	NEG	2	1	4	2	4	2	0.5	-1	2	1	1	0	BP
CBBA_T2	180.47	POS	80	POS	NEG	320	POS	NEG	80	POS	NEG	40	POS	NEG	0.25	-2	1	0	2	1	0.25	-2	8	3	2	1	BR
CBBA_T2	245.79	POS	160	POS	NEG	320	POS	NEG	80	POS	NEG	80	POS	NEG	0.5	-1	2	1	2	1	0.25	-2	4	2	1	0	BR
CBBA_T2	1512.5	POS	320	POS	NEG	20480	POS	POS	320	POS	NEG	160	POS	NEG	0.015625	-6	1	0	2	1	0.015625	-6	128	7	2	1	BR
CBBA_T2	650	POS	160	POS	NEG	10240	POS	POS	40	POS	NEG	160	POS	NEG	0.015625	-6	4	2	1	0	0.00390625	-8	64	6	0.25	-2	BR
CBBA_T2	169.65	POS	80	POS	NEG	640	POS	POS	160	POS	NEG	80	POS	NEG	0.125	-3	0.5	-1	1	0	0.25	-2	8	3	2	1	BR
CBBA_T2	669.5	POS	40	POS	NEG	640	POS	POS	20	POS	NEG	160	POS	NEG	0.0625	-4	2	1	0.25	-2	0.03125	-5	4	2	0.125	-3	BR
CBBA_T2	7534.9	POS	10240	POS	POS	20480	POS	POS	1280	POS	POS	320	POS	NEG	0.5	-1	8	3	32	5	0.0625	-4	64	6	4	2	BR
CBBA_T2	2980.2	POS	320	POS	NEG	1280	POS	POS	160	POS	NEG	320	POS	NEG	0.25	-2	2	1	1	0	0.125	-3	4	2	0.5	-1	BR
CBBA_T2	2049.2	POS	1280	POS	POS	5120	POS	POS	320	POS	NEG	160	POS	NEG	0.25	-2	4	2	8	3	0.0625	-4	32	5	2	1	BR
CBBA_T2	5530.2	POS	2560	POS	POS	20480	POS	POS	2560	POS	POS	640	POS	POS	0.125	-3	1	0	4	2	0.125	-3	32	5	4	2	BR
CBBA_T2	644.54	POS	160	POS	NEG	2560	POS	POS	80	POS	NEG	20	POS	NEG	0.0625	-4	2	1	8	3	0.03125	-5	128	7	4	2	BR
CBBA_T2	3674.6	POS	320	POS	NEG	20480	POS	POS	1280	POS	POS	80	POS	NEG	0.015625	-6	0.25	-2	4	2	0.0625	-4	256	8	16	4	BR
CBBA_T2	955.46	POS	80	POS	NEG	5120	POS	POS	80	POS	NEG	40	POS	NEG	0.015625	-6	1	0	2	1	0.015625	-6	128	7	2	1	BR
CBBA_T2	27.675	DOU	10	NEG	NEG	20	POS	NEG	10	NEG	NEG	10	NEG	NEG	0.5	-1	1	0	1	0	0.5	-1	2	1	1	0	BR
CBBA_T2	7069.9	POS	1280	POS	POS	20480	POS	POS	2560	POS	POS	40	POS	NEG	0.0625	-4	0.5	-1	32	5	0.125	-3	512	9	64	6	BR
CBBA_T2	6654.6	POS	1280	POS	POS	5120	POS	POS	1280	POS	POS	2560	POS	POS	0.25	-2	1	0	0.5	-1	0.25	-2	2	1	0.5	-1	BR
CBBA_T2	4827.1	POS	2560	POS	POS	20480	POS	POS	640	POS	POS	320	POS	NEG	0.125	-3	4	2	8	3	0.03125	-5	64	6	2	1	BR
CBBA_T2	5247.3	POS	1280	POS	POS	20480	POS	POS	1280	POS	POS	320	POS	NEG	0.0625	-4	1	0	4	2	0.0625	-4	64	6	4	2	BR
CBBA_T2	362.88	POS	40	POS	NEG	160	POS	NEG	20	POS	NEG	10	NEG	NEG	0.25	-2	2	1	4	2	0.125	-3	16	4	2	1	BR
CBBA_T2	1044.7	POS	160	POS	NEG	1280	POS	POS	80	POS	NEG	80	POS	NEG	0.125	-3	2	1	2	1	0.0625	-4	16	4	1	0	BR
CBBA_T2	8002.9	POS	2560	POS	POS	20480	POS	POS	1280	POS	POS	640	POS	POS	0.125	-3	2	1	4	2	0.0625	-4	32	5	2	1	BR
CBBA_T2	2620.5	POS	1280	POS	POS	40960	POS	POS	640	POS	POS	320	POS	NEG	0.03125	-5	2	1	4	2	0.015625	-6	128	7	2	1	BR
CBBA_T2	2477.8	POS	320	POS	NEG	5120	POS	POS	160	POS	NEG	640	POS	POS	0.0625	-4	2	1	0.5	-1	0.03125	-5	8	3	0.25	-2	BR
CBBA_T2	1222.6	POS	160	POS	NEG	320	POS	NEG	160	POS	NEG	160	POS	NEG	0.5	-1	1	0	1	0	0.5	-1	2	1	1	0	BR
CBBA_T2	1684.8	POS	640	POS	POS	5120	POS	POS	640	POS	POS	10	NEG	NEG	0.125	-3	1	0	64	6	0.125	-3	512	9	64	6	BR
CBBA_T2	544	POS	80	POS	NEG	1280	POS	POS	40	POS	NEG	40	POS	NEG	0.0625	-4	2	1	2	1	0.03125	-5	32	5	1	0	BR
CBBA_T2	22.662	NEG	10	NEG	NEG	10	NEG	NEG	10	NEG	NEG	10	NEG	NEG	1	0	1	0	1	0	1	0	1	0	1	0	NEG_ELISA
CBBA_T2	6516.4	POS	2560	POS	POS	20480	POS	POS	640	POS	POS	1280	POS	POS	0.125	-3	4	2	2	1	0.03125	-5	16	4	0.5	-1	BR
CBBA_T2	2368.5	POS	640	POS	POS	20480	POS	POS	160	POS	NEG	640	POS	POS	0.03125	-5	4	2	1	0	0.0078125	-7	32	5	0.25	-2	BR
CBBA_T2	1523.4	POS	80	POS	NEG	5120	POS	POS	40	POS	NEG	640	POS	POS	0.015625	-6	2	1	0.125	-3	0.0078125	-7	8	3	0.0625	-4	BR
CBBA_T2	10015	POS	5120	POS	POS	20480	POS	POS	1280	POS	POS	80	POS	NEG	0.25	-2	4	2	64	6	0.0625	-4	256	8	16	4	BR
CBBA_T2	2237.3	POS	320	POS	NEG	320	POS	NEG	160	POS	NEG	40	POS	NEG	1	0	2	1	8	3	0.5	-1	8	3	4	2	BP
CBBA_T2	1259.6	POS	160	POS	NEG	1280	POS	POS	160	POS	NEG	80	POS	NEG	0.125	-3	1	0	2	1	0.125	-3	16	4	2	1	BR
CBBA_T2	746.67	POS	1280	POS	POS	2560	POS	POS	320	POS	NEG	160	POS	NEG	0.5	-1	4	2	8	3	0.125	-3	16	4	2	1	BR
CBBA_T2	3141.7	POS	640	POS	POS	10240	POS	POS	160	POS	NEG	320	POS	NEG	0.0625	-4	4	2	2	1	0.015625	-6	32	5	0.5	-1	BR
CBBA_T2	2390.4	POS	1280	POS	POS	20480	POS	POS	640	POS	POS	160	POS	NEG	0.0625	-4	2	1	8	3	0.03125	-5	128	7	4	2	BR
CBBA_T2	6537.6	POS	2560	POS	POS	10240	POS	POS	5120	POS	POS	320	POS	NEG	0.25	-2	0.5	-1	8	3	0.5	-1	32	5	16	4	BR
CBBA_T2	1855.1	POS	1280	POS	POS	5120	POS	POS	320	POS	NEG	160	POS	NEG	0.25	-2	4	2	8	3	0.0625	-4	32	5	2	1	BR
CBBA_T2	856.07	POS	160	POS	NEG	640	POS	POS	80	POS	NEG	160	POS	NEG	0.25	-2	2	1	1	0	0.125	-3	4	2	0.5	-1	BR
CBBA_T2	4724.5	POS	1280	POS	POS	1280	POS	POS	640	POS	POS	320	POS	NEG	1	0	2	1	4	2	0.5	-1	4	2	2	1	BP
CBBA_T2	10788	POS	5120	POS	POS	20480	POS	POS	1280	POS	POS	1280	POS	POS	0.25	-2	4	2	4	2	0.0625	-4	16	4	1	0	BR
CBBA_T2	1016.7	POS	320	POS	NEG	1280	POS	POS	320	POS	NEG	320	POS	NEG	0.25	-2	1	0	1	0	0.25	-2	4	2	1	0	BR
CBBA_T2	5958.6	POS	1280	POS	POS	10240	POS	POS	5120	POS	POS	320	POS	NEG	0.125	-3	0.25	-2	4	2	0.5	-1	32	5	16	4	BR
CBBA_T2	973	POS	640	POS	POS	1280	POS	POS	320	POS	NEG	80	POS	NEG	0.5	-1	2	1	8	3	0.25	-2	16	4	4	2	BR
CBBA_T2	3413.3	POS	320	POS	NEG	5120	POS	POS	160	POS	NEG	80	POS	NEG	0.0625	-4	2	1	4	2	0.03125	-5	64	6	2	1	BR
CBBA_T2	1122.4	POS	80	POS	NEG	2560	POS	POS	40	POS	NEG	20	POS	NEG	0.03125	-5	2	1	4	2	0.015625	-6	128	7	2	1	BR
CBBA_T2	2934.3	POS	320	POS	NEG	320	POS	NEG	320	POS	NEG	320	POS	NEG	1	0	1	0	1	0	1	0	1	0	1	0	OM
CBBA_T2	5116.5	POS	640	POS	POS	1280	POS	POS	640	POS	POS	640	POS	POS	0.5	-1	1	0	1	0	0.5	-1	2	1	1	0	BR
CBBA_T2	1345.6	POS	640	POS	POS	2560	POS	POS	640	POS	POS	160	POS	NEG	0.25	-2	1	0	4	2	0.25	-2	16	4	4	2	BR
CBBA_T2	2491.6	POS	640	POS	POS	20480	POS	POS	2560	POS	POS	1280	POS	POS	0.03125	-5	0.25	-2	0.5	-1	0.125	-3	16	4	2	1	BR
CBBA_T2	3103.3	POS	640	POS	POS	10240	POS	POS	640	POS	POS	160	POS	NEG	0.0625	-4	1	0	4	2	0.0625	-4	64	6	4	2	BR
CBBA_T2	5027.7	POS	1280	POS	POS	10240	POS	POS	1280	POS	POS	320	POS	NEG	0.125	-3	1	0	4	2	0.125	-3	32	5	4	2	BR
CBBA_T2	1682.8	POS	640	POS	POS	5120	POS	POS	320	POS	NEG	20	POS	NEG	0.125	-3	2	1	32	5	0.0625	-4	256	8	16	4	BR
CBBA_T2	12203	POS	2560	POS	POS	20480	POS	POS	5120	POS	POS	1280	POS	POS	0.125	-3	0.5	-1	2	1	0.25	-2	16	4	4	2	BR
CBBA_T2	913.5	POS	160	POS	NEG	160	POS	NEG	320	POS	NEG	80	POS	NEG	1	0	0.5	-1	2	1	2	1	2	1	4	2	IN
CBBA_T2	1438.5	POS	640	POS	POS	320	POS	NEG	640	POS	POS	160	POS	NEG	2	1	1	0	4	2	2	1	2	1	4	2	BP
CBBA_T2	10682	POS	10240	POS	POS	20480	POS	POS	1280	POS	POS	1280	POS	POS	0.5	-1	8	3	8	3	0.0625	-4	16	4	1	0	BR
CBBA_T2	5919.1	POS	2560	POS	POS	40960	POS	POS	1280	POS	POS	160	POS	NEG	0.0625	-4	2	1	16	4	0.03125	-5	256	8	8	3	BR
CBBA_T2	9044.2	POS	1280	POS	POS	40960	POS	POS	2560	POS	POS	320	POS	NEG	0.03125	-5	0.5	-1	4	2	0.0625	-4	128	7	8	3	BR
CBBA_T2	2557.3	POS	640	POS	POS	2560	POS	POS	320	POS	NEG	80	POS	NEG	0.25	-2	2	1	8	3	0.125	-3	32	5	4	2	BR
CBBA_T2	7135.7	POS	1280	POS	POS	20480	POS	POS	1280	POS	POS	160	POS	NEG	0.0625	-4	1	0	8	3	0.0625	-4	128	7	8	3	BR
CBBA_T2	4938.9	POS	1280	POS	POS	20480	POS	POS	640	POS	POS	160	POS	NEG	0.0625	-4	2	1	8	3	0.03125	-5	128	7	4	2	BR
CBBA_T2	9664.4	POS	1280	POS	POS	2560	POS	POS	1280	POS	POS	160	POS	NEG	0.5	-1	1	0	8	3	0.5	-1	16	4	8	3	BR
CBBA_T2	3795.9	POS	1280	POS	POS	1280	POS	POS	320	POS	NEG	160	POS	NEG	1	0	4	2	8	3	0.25	-2	8	3	2	1	BP
CBBA_T2	10413	POS	2560	POS	POS	10240	POS	POS	2560	POS	POS	640	POS	POS	0.25	-2	1	0	4	2	0.25	-2	16	4	4	2	BR
CBBA_T2	8365.6	POS	5120	POS	POS	40960	POS	POS	2560	POS	POS	1280	POS	POS	0.125	-3	2	1	4	2	0.0625	-4	32	5	2	1	BR
CBBA_T2	2095	POS	320	POS	NEG	2560	POS	POS	160	POS	NEG	10	NEG	NEG	0.125	-3	2	1	32	5	0.0625	-4	256	8	16	4	BR
CBBA_T2	6681.9	POS	5120	POS	POS	20480	POS	POS	5120	POS	POS	1280	POS	POS	0.25	-2	1	0	4	2	0.25	-2	16	4	4	2	BR
CBBA_T2	3023.2	POS	1280	POS	POS	2560	POS	POS	1280	POS	POS	40	POS	NEG	0.5	-1	1	0	32	5	0.5	-1	64	6	32	5	BR
CBBA_T2	1742.2	POS	320	POS	NEG	20480	POS	POS	640	POS	POS	80	POS	NEG	0.015625	-6	0.5	-1	4	2	0.03125	-5	256	8	8	3	BR
CBBA_T2	3870	POS	640	POS	POS	160	POS	NEG	160	POS	NEG	320	POS	NEG	4	2	4	2	2	1	1	0	0.5	-1	0.5	-1	BP
CBBA_T2	1453.2	POS	320	POS	NEG	640	POS	POS	80	POS	NEG	160	POS	NEG	0.5	-1	4	2	2	1	0.125	-3	4	2	0.5	-1	BR
CBBA_T2	36.185	POS	10	NEG	NEG	20	POS	NEG	10	NEG	NEG	160	POS	NEG	0.5	-1	1	0	0.0625	-4	0.5	-1	0.125	-3	0.0625	-4	OM
CBBA_T2	6371.7	POS	1280	POS	POS	5120	POS	POS	640	POS	POS	320	POS	NEG	0.25	-2	2	1	4	2	0.125	-3	16	4	2	1	BR
CBBA_T2	2398.5	POS	1280	POS	POS	640	POS	POS	320	POS	NEG	640	POS	POS	2	1	4	2	2	1	0.5	-1	1	0	0.5	-1	BP
CBBA_T2	603.28	POS	160	POS	NEG	160	POS	NEG	160	POS	NEG	40	POS	NEG	1	0	1	0	4	2	1	0	4	2	4	2	BP
CBBA_T2	1940.6	POS	320	POS	NEG	640	POS	POS	320	POS	NEG	320	POS	NEG	0.5	-1	1	0	1	0	0.5	-1	2	1	1	0	BR
CBBA_T2	1479.6	POS	160	POS	NEG	160	POS	NEG	320	POS	NEG	160	POS	NEG	1	0	0.5	-1	1	0	2	1	1	0	2	1	IN
CBBA_T2	7227.4	POS	2560	POS	POS	2560	POS	POS	1280	POS	POS	2560	POS	POS	1	0	2	1	1	0	0.5	-1	1	0	0.5	-1	OM
CBBA_T2	8611.3	POS	2560	POS	POS	2560	POS	POS	640	POS	POS	160	POS	NEG	1	0	4	2	16	4	0.25	-2	16	4	4	2	BP
CBBA_T2	4639.8	POS	640	POS	POS	640	POS	POS	640	POS	POS	320	POS	NEG	1	0	1	0	2	1	1	0	2	1	2	1	BP
CBBA_T2	1101.2	POS	320	POS	NEG	320	POS	NEG	320	POS	NEG	320	POS	NEG	1	0	1	0	1	0	1	0	1	0	1	0	OM
CBBA_T2	8283.7	POS	5120	POS	POS	2560	POS	POS	1280	POS	POS	320	POS	NEG	2	1	4	2	16	4	0.5	-1	8	3	4	2	BP
CBBA_T2	1513.2	POS	640	POS	POS	1280	POS	POS	320	POS	NEG	160	POS	NEG	0.5	-1	2	1	4	2	0.25	-2	8	3	2	1	BR
CBBA_T2	715.29	POS	160	POS	NEG	320	POS	NEG	80	POS	NEG	80	POS	NEG	0.5	-1	2	1	2	1	0.25	-2	4	2	1	0	BR
CBBA_T2	6937.5	POS	1280	POS	POS	640	POS	POS	1280	POS	POS	1280	POS	POS	2	1	1	0	1	0	2	1	0.5	-1	1	0	OM
CBBA_T2	815.04	POS	80	POS	NEG	160	POS	NEG	80	POS	NEG	80	POS	NEG	0.5	-1	1	0	1	0	0.5	-1	2	1	1	0	BR
CBBA_T2	7371.1	POS	2560	POS	POS	5120	POS	POS	5120	POS	POS	640	POS	POS	0.5	-1	0.5	-1	4	2	1	0	8	3	8	3	BR
CBBA_T2	5600.9	POS	640	POS	POS	640	POS	POS	320	POS	NEG	20	POS	NEG	1	0	2	1	32	5	0.5	-1	32	5	16	4	BP
CBBA_T2	1573.6	POS	160	POS	NEG	640	POS	POS	640	POS	POS	640	POS	POS	0.25	-2	0.25	-2	0.25	-2	1	0	1	0	1	0	OM
CBBA_T2	4156	POS	640	POS	POS	2560	POS	POS	1280	POS	POS	640	POS	POS	0.25	-2	0.5	-1	1	0	0.5	-1	4	2	2	1	BR
CBBA_T2	4155.2	POS	1280	POS	POS	1280	POS	POS	2560	POS	POS	320	POS	NEG	1	0	0.5	-1	4	2	2	1	4	2	8	3	IN
CBBA_T2	4841.4	POS	1280	POS	POS	640	POS	POS	1280	POS	POS	160	POS	NEG	2	1	1	0	8	3	2	1	4	2	8	3	BP
CBBA_T2	861.54	POS	160	POS	NEG	320	POS	NEG	40	POS	NEG	40	POS	NEG	0.5	-1	4	2	4	2	0.125	-3	8	3	1	0	BR
CBBA_T2	4194.9	POS	640	POS	POS	1280	POS	POS	1280	POS	POS	80	POS	NEG	0.5	-1	0.5	-1	8	3	1	0	16	4	16	4	BR
CBBA_T2	4162.2	POS	2560	POS	POS	2560	POS	POS	1280	POS	POS	320	POS	NEG	1	0	2	1	8	3	0.5	-1	8	3	4	2	BP
CBBA_T2	4.9075	NEG	10	NEG	NEG	10	NEG	NEG	10	NEG	NEG	10	NEG	NEG	1	0	1	0	1	0	1	0	1	0	1	0	NEG_ELISA
CBBA_T2	4074.8	POS	640	POS	POS	640	POS	POS	640	POS	POS	320	POS	NEG	1	0	1	0	2	1	1	0	2	1	2	1	BP
CBBA_T2	7397.1	POS	1280	POS	POS	640	POS	POS	320	POS	NEG	40	POS	NEG	2	1	4	2	32	5	0.5	-1	16	4	8	3	BP
CBBA_T2	394.89	POS	40	POS	NEG	160	POS	NEG	80	POS	NEG	80	POS	NEG	0.25	-2	0.5	-1	0.5	-1	0.5	-1	2	1	1	0	BR
CBBA_T2	62.769	POS	20	POS	NEG	20	POS	NEG	20	POS	NEG	80	POS	NEG	1	0	1	0	0.25	-2	1	0	0.25	-2	0.25	-2	OM
CBBA_T2	2251.7	POS	320	POS	NEG	320	POS	NEG	320	POS	NEG	80	POS	NEG	1	0	1	0	4	2	1	0	4	2	4	2	BP
CBBA_T2	2577.4	POS	320	POS	NEG	1280	POS	POS	160	POS	NEG	160	POS	NEG	0.25	-2	2	1	2	1	0.125	-3	8	3	1	0	BR
CBBA_T2	5745.8	POS	1280	POS	POS	2560	POS	POS	5120	POS	POS	640	POS	POS	0.5	-1	0.25	-2	2	1	2	1	4	2	8	3	IN
CBBA_T2	289.6	POS	40	POS	NEG	10	NEG	NEG	80	POS	NEG	640	POS	POS	4	2	0.5	-1	0.0625	-4	8	3	0.015625	-6	0.125	-3	OM
CBBA_T2	2902.5	POS	320	POS	NEG	2560	POS	POS	1280	POS	POS	320	POS	NEG	0.125	-3	0.25	-2	1	0	0.5	-1	8	3	4	2	BR
CBBA_T2	3125	POS	640	POS	POS	2560	POS	POS	640	POS	POS	640	POS	POS	0.25	-2	1	0	1	0	0.25	-2	4	2	1	0	BR
CBBA_T2	785.88	POS	80	POS	NEG	320	POS	NEG	160	POS	NEG	20	POS	NEG	0.25	-2	0.5	-1	4	2	0.5	-1	16	4	8	3	BR
CBBA_T2	627.74	POS	640	POS	POS	320	POS	NEG	160	POS	NEG	10	NEG	NEG	2	1	4	2	64	6	0.5	-1	32	5	16	4	BP
CBBA_T2	8213.5	POS	2560	POS	POS	2560	POS	POS	1280	POS	POS	160	POS	NEG	1	0	2	1	16	4	0.5	-1	16	4	8	3	BP
CBBA_T2	315.66	POS	160	POS	NEG	160	POS	NEG	80	POS	NEG	10	NEG	NEG	1	0	2	1	16	4	0.5	-1	16	4	8	3	BP
CBBA_T2	1563.6	POS	160	POS	NEG	320	POS	NEG	80	POS	NEG	40	POS	NEG	0.5	-1	2	1	4	2	0.25	-2	8	3	2	1	BR
CBBA_T2	3958.3	POS	1280	POS	POS	1280	POS	POS	1280	POS	POS	640	POS	POS	1	0	1	0	2	1	1	0	2	1	2	1	BP
CBBA_T2	702.91	POS	40	POS	NEG	160	POS	NEG	20	POS	NEG	80	POS	NEG	0.25	-2	2	1	0.5	-1	0.125	-3	2	1	0.25	-2	BR
CBBA_T2	3552.2	POS	640	POS	POS	1280	POS	POS	1280	POS	POS	320	POS	NEG	0.5	-1	0.5	-1	2	1	1	0	4	2	4	2	BR
CBBA_T2	241.52	POS	80	POS	NEG	1280	POS	POS	20	POS	NEG	10	NEG	NEG	0.0625	-4	4	2	8	3	0.015625	-6	128	7	2	1	BR
CBBA_T2	494.98	POS	80	POS	NEG	40	POS	NEG	40	POS	NEG	10	NEG	NEG	2	1	2	1	8	3	1	0	4	2	4	2	BP
CBBA_T2	1318.2	POS	160	POS	NEG	640	POS	POS	320	POS	NEG	160	POS	NEG	0.25	-2	0.5	-1	1	0	0.5	-1	4	2	2	1	BR
CBBA_T2	2140.2	POS	320	POS	NEG	640	POS	POS	320	POS	NEG	80	POS	NEG	0.5	-1	1	0	4	2	0.5	-1	8	3	4	2	BR
CBBA_T2	716.58	POS	80	POS	NEG	640	POS	POS	80	POS	NEG	20	POS	NEG	0.125	-3	1	0	4	2	0.125	-3	32	5	4	2	BR
CBBA_T2	5235.2	POS	2560	POS	POS	640	POS	POS	1280	POS	POS	1280	POS	POS	4	2	2	1	2	1	2	1	0.5	-1	1	0	BP
CBBA_T2	1126.8	POS	160	POS	NEG	80	POS	NEG	160	POS	NEG	40	POS	NEG	2	1	1	0	4	2	2	1	2	1	4	2	BP
CBBA_T2	7020.1	POS	1280	POS	POS	2560	POS	POS	1280	POS	POS	640	POS	POS	0.5	-1	1	0	2	1	0.5	-1	4	2	2	1	BR
CBBA_T2	1693.4	POS	160	POS	NEG	2560	POS	POS	40	POS	NEG	10	NEG	NEG	0.0625	-4	4	2	16	4	0.015625	-6	256	8	4	2	BR
CBBA_T2	637.96	POS	80	POS	NEG	640	POS	POS	40	POS	NEG	80	POS	NEG	0.125	-3	2	1	1	0	0.0625	-4	8	3	0.5	-1	BR
CBBA_T2	2750.7	POS	1280	POS	POS	160	POS	NEG	1280	POS	POS	160	POS	NEG	8	3	1	0	8	3	8	3	1	0	8	3	BP
CBBA_T2	1244.7	POS	320	POS	NEG	160	POS	NEG	320	POS	NEG	40	POS	NEG	2	1	1	0	8	3	2	1	4	2	8	3	BP
CBBA_T2	8564.5	POS	1280	POS	POS	10240	POS	POS	1280	POS	POS	2560	POS	POS	0.125	-3	1	0	0.5	-1	0.125	-3	4	2	0.5	-1	BR
CBBA_T2	3019	POS	640	POS	POS	320	POS	NEG	320	POS	NEG	80	POS	NEG	2	1	2	1	8	3	1	0	4	2	4	2	BP
CBBA_T2	1376.9	POS	320	POS	NEG	320	POS	NEG	320	POS	NEG	160	POS	NEG	1	0	1	0	2	1	1	0	2	1	2	1	BP
CBBA_T2	2069.7	POS	320	POS	NEG	640	POS	POS	640	POS	POS	80	POS	NEG	0.5	-1	0.5	-1	4	2	1	0	8	3	8	3	BR
CBBA_T2	30.975	DOU	10	NEG	NEG	160	POS	NEG	10	NEG	NEG	10	NEG	NEG	0.0625	-4	1	0	1	0	0.0625	-4	16	4	1	0	BR
CBBA_T2	226.27	POS	160	POS	NEG	40	POS	NEG	40	POS	NEG	10	NEG	NEG	4	2	4	2	16	4	1	0	4	2	4	2	BP
CBBA_T2	1579.4	POS	640	POS	POS	40	POS	NEG	160	POS	NEG	80	POS	NEG	16	4	4	2	8	3	4	2	0.5	-1	2	1	BP
CBBA_T2	2271.1	POS	640	POS	POS	640	POS	POS	320	POS	NEG	80	POS	NEG	1	0	2	1	8	3	0.5	-1	8	3	4	2	BP
CBBA_T2	17.315	NEG	10	NEG	NEG	10	NEG	NEG	10	NEG	NEG	10	NEG	NEG	1	0	1	0	1	0	1	0	1	0	1	0	NEG_ELISA
CBBA_T2	834.19	POS	80	POS	NEG	20	POS	NEG	640	POS	POS	20	POS	NEG	4	2	0.125	-3	4	2	32	5	1	0	32	5	IN
CBBA_T2	3181.5	POS	640	POS	POS	2560	POS	POS	1280	POS	POS	640	POS	POS	0.25	-2	0.5	-1	1	0	0.5	-1	4	2	2	1	BR
CBBA_T2	4809.3	POS	2560	POS	POS	2560	POS	POS	1280	POS	POS	160	POS	NEG	1	0	2	1	16	4	0.5	-1	16	4	8	3	BP
CBBA_T2	5657.9	POS	2560	POS	POS	20480	POS	POS	1280	POS	POS	160	POS	NEG	0.125	-3	2	1	16	4	0.0625	-4	128	7	8	3	BR
CBBA_T2	6727.6	POS	1280	POS	POS	2560	POS	POS	320	POS	NEG	160	POS	NEG	0.5	-1	4	2	8	3	0.125	-3	16	4	2	1	BR
CBBA_T2	2160.7	POS	320	POS	NEG	320	POS	NEG	320	POS	NEG	160	POS	NEG	1	0	1	0	2	1	1	0	2	1	2	1	BP
CBBA_T2	3430.7	POS	320	POS	NEG	320	POS	NEG	320	POS	NEG	40	POS	NEG	1	0	1	0	8	3	1	0	8	3	8	3	BP
CBBA_T2	1007.1	POS	160	POS	NEG	320	POS	NEG	320	POS	NEG	80	POS	NEG	0.5	-1	0.5	-1	2	1	1	0	4	2	4	2	BR
CBBA_T2	1295.9	POS	160	POS	NEG	320	POS	NEG	160	POS	NEG	80	POS	NEG	0.5	-1	1	0	2	1	0.5	-1	4	2	2	1	BR
CBBA_T2	979.15	POS	320	POS	NEG	320	POS	NEG	320	POS	NEG	20	POS	NEG	1	0	1	0	16	4	1	0	16	4	16	4	BP
CBBA_T2	6081.2	POS	1280	POS	POS	5120	POS	POS	1280	POS	POS	640	POS	POS	0.25	-2	1	0	2	1	0.25	-2	8	3	2	1	BR
CBBA_T2	4050.7	POS	640	POS	POS	5120	POS	POS	320	POS	NEG	160	POS	NEG	0.125	-3	2	1	4	2	0.0625	-4	32	5	2	1	BR
CBBA_T2	2613	POS	1280	POS	POS	2560	POS	POS	320	POS	NEG	320	POS	NEG	0.5	-1	4	2	4	2	0.125	-3	8	3	1	0	BR
CBBA_T2	5183.6	POS	1280	POS	POS	1280	POS	POS	1280	POS	POS	1280	POS	POS	1	0	1	0	1	0	1	0	1	0	1	0	OM
CBBA_T2	323.59	POS	160	POS	NEG	160	POS	NEG	160	POS	NEG	20	POS	NEG	1	0	1	0	8	3	1	0	8	3	8	3	BP
CBBA_T2	1597.1	POS	640	POS	POS	640	POS	POS	640	POS	POS	80	POS	NEG	1	0	1	0	8	3	1	0	8	3	8	3	BP
CBBA_T2	2223.4	POS	1280	POS	POS	640	POS	POS	640	POS	POS	80	POS	NEG	2	1	2	1	16	4	1	0	8	3	8	3	BP
CBBA_T2	246.93	POS	160	POS	NEG	320	POS	NEG	160	POS	NEG	80	POS	NEG	0.5	-1	1	0	2	1	0.5	-1	4	2	2	1	BR
CBBA_T2	2159.8	POS	160	POS	NEG	640	POS	POS	320	POS	NEG	80	POS	NEG	0.25	-2	0.5	-1	2	1	0.5	-1	8	3	4	2	BR
CBBA_T2	96.081	POS	20	POS	NEG	640	POS	POS	20	POS	NEG	10	NEG	NEG	0.03125	-5	1	0	2	1	0.03125	-5	64	6	2	1	BR
CBBA_T2	776.75	POS	160	POS	NEG	320	POS	NEG	160	POS	NEG	40	POS	NEG	0.5	-1	1	0	4	2	0.5	-1	8	3	4	2	BR
CBBA_T2	1329.9	POS	640	POS	POS	320	POS	NEG	320	POS	NEG	160	POS	NEG	2	1	2	1	4	2	1	0	2	1	2	1	BP
CBBA_T2	1661.7	POS	320	POS	NEG	640	POS	POS	320	POS	NEG	160	POS	NEG	0.5	-1	1	0	2	1	0.5	-1	4	2	2	1	BR
CBBA_T2	3180	POS	640	POS	POS	1280	POS	POS	640	POS	POS	80	POS	NEG	0.5	-1	1	0	8	3	0.5	-1	16	4	8	3	BR
CBBA_T2	75.649	POS	10	NEG	NEG	10	NEG	NEG	10	NEG	NEG	40	POS	NEG	1	0	1	0	0.25	-2	1	0	0.25	-2	0.25	-2	OM
CBBA_T2	1341.7	POS	640	POS	POS	2560	POS	POS	320	POS	NEG	160	POS	NEG	0.25	-2	2	1	4	2	0.125	-3	16	4	2	1	BR
CBBA_T2	2098.9	POS	1280	POS	POS	2560	POS	POS	320	POS	NEG	320	POS	NEG	0.5	-1	4	2	4	2	0.125	-3	8	3	1	0	BR
CBBA_T2	247.26	POS	160	POS	NEG	160	POS	NEG	160	POS	NEG	10	NEG	NEG	1	0	1	0	16	4	1	0	16	4	16	4	BP
CBBA_T2	7093	POS	1280	POS	POS	1280	POS	POS	2560	POS	POS	1280	POS	POS	1	0	0.5	-1	1	0	2	1	1	0	2	1	IN
CBBA_T2	1711.6	POS	640	POS	POS	640	POS	POS	640	POS	POS	80	POS	NEG	1	0	1	0	8	3	1	0	8	3	8	3	BP
CBBA_T2	2271.1	POS	640	POS	POS	2560	POS	POS	320	POS	NEG	320	POS	NEG	0.25	-2	2	1	2	1	0.125	-3	8	3	1	0	BR
CBBA_T2	376.95	POS	80	POS	NEG	320	POS	NEG	80	POS	NEG	40	POS	NEG	0.25	-2	1	0	2	1	0.25	-2	8	3	2	1	BR
CBBA_T2	2276.4	POS	160	POS	NEG	1280	POS	POS	320	POS	NEG	320	POS	NEG	0.125	-3	0.5	-1	0.5	-1	0.25	-2	4	2	1	0	BR
CBBA_T2	3047.3	POS	640	POS	POS	640	POS	POS	640	POS	POS	40	POS	NEG	1	0	1	0	16	4	1	0	16	4	16	4	BP
CBBA_T2	705.88	POS	320	POS	NEG	160	POS	NEG	160	POS	NEG	80	POS	NEG	2	1	2	1	4	2	1	0	2	1	2	1	BP
CBBA_T2	79.13	POS	20	POS	NEG	320	POS	NEG	10	NEG	NEG	10	NEG	NEG	0.0625	-4	2	1	2	1	0.03125	-5	32	5	1	0	BR
CBBA_T2	92.117	POS	40	POS	NEG	40	POS	NEG	80	POS	NEG	20	POS	NEG	1	0	0.5	-1	2	1	2	1	2	1	4	2	IN
CBBA_T2	321.69	POS	80	POS	NEG	80	POS	NEG	160	POS	NEG	80	POS	NEG	1	0	0.5	-1	1	0	2	1	1	0	2	1	IN
CBBA_T2	3758.1	POS	2560	POS	POS	5120	POS	POS	1280	POS	POS	160	POS	NEG	0.5	-1	2	1	16	4	0.25	-2	32	5	8	3	BR
CBBA_T2	4500	POS	640	POS	POS	640	POS	POS	1280	POS	POS	320	POS	NEG	1	0	0.5	-1	2	1	2	1	2	1	4	2	IN
CBBA_T2	4137.8	POS	5120	POS	POS	5120	POS	POS	5120	POS	POS	640	POS	POS	1	0	1	0	8	3	1	0	8	3	8	3	BP
CBBA_T2	23.557	NEG	10	NEG	NEG	10	NEG	NEG	10	NEG	NEG	10	NEG	NEG	1	0	1	0	1	0	1	0	1	0	1	0	NEG_ELISA
CBBA_T2	1160	POS	320	POS	NEG	640	POS	POS	320	POS	NEG	40	POS	NEG	0.5	-1	1	0	8	3	0.5	-1	16	4	8	3	BR
CBBA_T2	807.06	POS	80	POS	NEG	10	NEG	NEG	320	POS	NEG	10	NEG	NEG	8	3	0.25	-2	8	3	32	5	1	0	32	5	IN
CBBA_T2	3005.8	POS	320	POS	NEG	1280	POS	POS	640	POS	POS	40	POS	NEG	0.25	-2	0.5	-1	8	3	0.5	-1	32	5	16	4	BR
CBBA_T2	2427.5	POS	320	POS	NEG	640	POS	POS	320	POS	NEG	80	POS	NEG	0.5	-1	1	0	4	2	0.5	-1	8	3	4	2	BR
CBBA_T2	5740.6	POS	640	POS	POS	640	POS	POS	640	POS	POS	160	POS	NEG	1	0	1	0	4	2	1	0	4	2	4	2	BP
CBBA_T2	734.12	POS	160	POS	NEG	640	POS	POS	160	POS	NEG	320	POS	NEG	0.25	-2	1	0	0.5	-1	0.25	-2	2	1	0.5	-1	BR
CBBA_T2	1030.6	POS	320	POS	NEG	80	POS	NEG	320	POS	NEG	320	POS	NEG	4	2	1	0	1	0	4	2	0.25	-2	1	0	OM
CBBA_T2	173.31	POS	160	POS	NEG	80	POS	NEG	80	POS	NEG	10	NEG	NEG	2	1	2	1	16	4	1	0	8	3	8	3	BP
CBBA_T2	205.41	POS	20	POS	NEG	10	NEG	NEG	10	NEG	NEG	10	NEG	NEG	2	1	2	1	2	1	1	0	1	0	1	0	BP
CBBA_T2	1007.1	POS	80	POS	NEG	80	POS	NEG	40	POS	NEG	10	NEG	NEG	1	0	2	1	8	3	0.5	-1	8	3	4	2	BP
CBBA_T2	4486.1	POS	1280	POS	POS	2560	POS	POS	2560	POS	POS	40	POS	NEG	0.5	-1	0.5	-1	32	5	1	0	64	6	64	6	BR
CBBA_T2	1317.1	POS	320	POS	NEG	160	POS	NEG	320	POS	NEG	160	POS	NEG	2	1	1	0	2	1	2	1	1	0	2	1	BP
CBBA_T2	5921.6	POS	1280	POS	POS	2560	POS	POS	320	POS	NEG	320	POS	NEG	0.5	-1	4	2	4	2	0.125	-3	8	3	1	0	BR
CBBA_T2	271.79	POS	40	POS	NEG	20	POS	NEG	20	POS	NEG	10	NEG	NEG	2	1	2	1	4	2	1	0	2	1	2	1	BP
CBBA_T2	12543	POS	5120	POS	POS	5120	POS	POS	1280	POS	POS	320	POS	NEG	1	0	4	2	16	4	0.25	-2	16	4	4	2	BP
CBBA_T2	7628.5	POS	2560	POS	POS	2560	POS	POS	2560	POS	POS	160	POS	NEG	1	0	1	0	16	4	1	0	16	4	16	4	BP
CBBA_T2	1905.3	POS	640	POS	POS	320	POS	NEG	320	POS	NEG	160	POS	NEG	2	1	2	1	4	2	1	0	2	1	2	1	BP
CBBA_T2	318.31	POS	40	POS	NEG	10	NEG	NEG	10	NEG	NEG	20	POS	NEG	4	2	4	2	2	1	1	0	0.5	-1	0.5	-1	BP
Santa_Cruz_T2	2116.9	POS	2560	POS	POS	5120	POS	POS	640	POS	POS	2560	POS	POS	0.5	-1	4	2	1	0	0.125	-3	2	1	0.25	-2	BR
Santa_Cruz_T2	2608.2	POS	1280	POS	POS	2560	POS	POS	320	POS	NEG	1280	POS	POS	0.5	-1	4	2	1	0	0.125	-3	2	1	0.25	-2	BR
Santa_Cruz_T2	910.07	POS	320	POS	NEG	640	POS	POS	80	POS	NEG	80	POS	NEG	0.5	-1	4	2	4	2	0.125	-3	8	3	1	0	BR
Santa_Cruz_T2	1430.4	POS	1280	POS	POS	320	POS	NEG	320	POS	NEG	160	POS	NEG	4	2	4	2	8	3	1	0	2	1	2	1	BP
Santa_Cruz_T2	1452.3	POS	1280	POS	POS	640	POS	POS	320	POS	NEG	320	POS	NEG	2	1	4	2	4	2	0.5	-1	2	1	1	0	BP
Santa_Cruz_T2	9910.1	POS	5120	POS	POS	2560	POS	POS	2560	POS	POS	2560	POS	POS	2	1	2	1	2	1	1	0	1	0	1	0	BP
Santa_Cruz_T2	17210	POS	5120	POS	POS	2560	POS	POS	1280	POS	POS	1280	POS	POS	2	1	4	2	4	2	0.5	-1	2	1	1	0	BP
Santa_Cruz_T2	1342.9	POS	640	POS	POS	320	POS	NEG	640	POS	POS	640	POS	POS	2	1	1	0	1	0	2	1	0.5	-1	1	0	OM
Santa_Cruz_T2	15698	POS	5120	POS	POS	2560	POS	POS	10240	POS	POS	10240	POS	POS	2	1	0.5	-1	0.5	-1	4	2	0.25	-2	1	0	OM
Santa_Cruz_T2	1430.4	POS	640	POS	POS	160	POS	NEG	80	POS	NEG	160	POS	NEG	4	2	8	3	4	2	0.5	-1	1	0	0.5	-1	BP
Santa_Cruz_T2	1783.2	POS	2560	POS	POS	640	POS	POS	320	POS	NEG	320	POS	NEG	4	2	8	3	8	3	0.5	-1	2	1	1	0	BP
Santa_Cruz_T2	1884.4	POS	1280	POS	POS	80	POS	NEG	160	POS	NEG	40	POS	NEG	16	4	8	3	32	5	2	1	2	1	4	2	BP
Santa_Cruz_T2	222.99	POS	320	POS	NEG	640	POS	POS	160	POS	NEG	40	POS	NEG	0.5	-1	2	1	8	3	0.25	-2	16	4	4	2	BR
Santa_Cruz_T2	121.6	POS	80	POS	NEG	20	POS	NEG	10	NEG	NEG	10	NEG	NEG	4	2	8	3	8	3	0.5	-1	2	1	1	0	BP
Santa_Cruz_T2	2516.5	POS	1280	POS	POS	160	POS	NEG	320	POS	NEG	160	POS	NEG	8	3	4	2	8	3	2	1	1	0	2	1	BP
Santa_Cruz_T2	3108.8	POS	1280	POS	POS	640	POS	POS	160	POS	NEG	40	POS	NEG	2	1	8	3	32	5	0.25	-2	16	4	4	2	BP
Santa_Cruz_T2	1130.2	POS	640	POS	POS	1280	POS	POS	320	POS	NEG	160	POS	NEG	0.5	-1	2	1	4	2	0.25	-2	8	3	2	1	BR
Santa_Cruz_T2	962.27	POS	2560	POS	POS	320	POS	NEG	320	POS	NEG	80	POS	NEG	8	3	8	3	32	5	1	0	4	2	4	2	BP
Santa_Cruz_T2	1425	POS	2560	POS	POS	1280	POS	POS	640	POS	POS	320	POS	NEG	2	1	4	2	8	3	0.5	-1	4	2	2	1	BP
Santa_Cruz_T2	54.8	POS	40	POS	NEG	10	NEG	NEG	40	POS	NEG	10	NEG	NEG	4	2	1	0	4	2	4	2	1	0	4	2	BP
Santa_Cruz_T2	1549	POS	1280	POS	POS	320	POS	NEG	160	POS	NEG	160	POS	NEG	4	2	8	3	8	3	0.5	-1	2	1	1	0	BP
Santa_Cruz_T2	3924.3	POS	1280	POS	POS	2560	POS	POS	320	POS	NEG	320	POS	NEG	0.5	-1	4	2	4	2	0.125	-3	8	3	1	0	BR
Santa_Cruz_T2	1527.3	POS	320	POS	NEG	1280	POS	POS	320	POS	NEG	160	POS	NEG	0.25	-2	1	0	2	1	0.25	-2	8	3	2	1	BR
Santa_Cruz_T2	1194.8	POS	5120	POS	POS	320	POS	NEG	640	POS	POS	80	POS	NEG	16	4	8	3	64	6	2	1	4	2	8	3	BP
Santa_Cruz_T2	1050.8	POS	2560	POS	POS	320	POS	NEG	320	POS	NEG	80	POS	NEG	8	3	8	3	32	5	1	0	4	2	4	2	BP
Santa_Cruz_T2	149.69	POS	40	POS	NEG	10	NEG	NEG	10	NEG	NEG	20	POS	NEG	4	2	4	2	2	1	1	0	0.5	-1	0.5	-1	BP
Santa_Cruz_T2	6483.7	POS	10240	POS	POS	1280	POS	POS	1280	POS	POS	320	POS	NEG	8	3	8	3	32	5	1	0	4	2	4	2	BP
Santa_Cruz_T2	2004.8	POS	5120	POS	POS	320	POS	NEG	640	POS	POS	160	POS	NEG	16	4	8	3	32	5	2	1	2	1	4	2	BP
Santa_Cruz_T2	1162	POS	1280	POS	POS	320	POS	NEG	320	POS	NEG	80	POS	NEG	4	2	4	2	16	4	1	0	4	2	4	2	BP
Santa_Cruz_T2	1297.4	POS	2560	POS	POS	160	POS	NEG	320	POS	NEG	40	POS	NEG	16	4	8	3	64	6	2	1	4	2	8	3	BP
Santa_Cruz_T2	15.455	NEG	10	NEG	NEG	10	NEG	NEG	10	NEG	NEG	10	NEG	NEG	1	0	1	0	1	0	1	0	1	0	1	0	NEG_ELISA
Santa_Cruz_T2	849.69	POS	1280	POS	POS	1280	POS	POS	320	POS	NEG	80	POS	NEG	1	0	4	2	16	4	0.25	-2	16	4	4	2	BP
Santa_Cruz_T2	1701.2	POS	2560	POS	POS	640	POS	POS	1280	POS	POS	160	POS	NEG	4	2	2	1	16	4	2	1	4	2	8	3	BP
Santa_Cruz_T2	2095	POS	2560	POS	POS	320	POS	NEG	640	POS	POS	40	POS	NEG	8	3	4	2	64	6	2	1	8	3	16	4	BP
Santa_Cruz_T2	637.71	POS	320	POS	NEG	80	POS	NEG	80	POS	NEG	20	POS	NEG	4	2	4	2	16	4	1	0	4	2	4	2	BP
Santa_Cruz_T2	1091.6	POS	1280	POS	POS	320	POS	NEG	640	POS	POS	80	POS	NEG	4	2	2	1	16	4	2	1	4	2	8	3	BP
Santa_Cruz_T2	329.67	POS	160	POS	NEG	80	POS	NEG	40	POS	NEG	10	NEG	NEG	2	1	4	2	16	4	0.5	-1	8	3	4	2	BP
Santa_Cruz_T2	2002.2	POS	1280	POS	POS	2560	POS	POS	320	POS	NEG	160	POS	NEG	0.5	-1	4	2	8	3	0.125	-3	16	4	2	1	BR
Santa_Cruz_T2	519.04	POS	1280	POS	POS	320	POS	NEG	320	POS	NEG	160	POS	NEG	4	2	4	2	8	3	1	0	2	1	2	1	BP
Santa_Cruz_T2	12613	POS	20480	POS	POS	20480	POS	POS	2560	POS	POS	2560	POS	POS	1	0	8	3	8	3	0.125	-3	8	3	1	0	BP
Santa_Cruz_T2	1684.8	POS	1280	POS	POS	320	POS	NEG	640	POS	POS	80	POS	NEG	4	2	2	1	16	4	2	1	4	2	8	3	BP
Santa_Cruz_T2	202.65	POS	160	POS	NEG	40	POS	NEG	40	POS	NEG	40	POS	NEG	4	2	4	2	4	2	1	0	1	0	1	0	BP
Santa_Cruz_T2	3924.3	POS	10240	POS	POS	1280	POS	POS	1280	POS	POS	160	POS	NEG	8	3	8	3	64	6	1	0	8	3	8	3	BP
Santa_Cruz_T2	167.53	POS	40	POS	NEG	80	POS	NEG	40	POS	NEG	40	POS	NEG	0.5	-1	1	0	1	0	0.5	-1	2	1	1	0	BR
Santa_Cruz_T2	3645.6	POS	10240	POS	POS	2560	POS	POS	1280	POS	POS	320	POS	NEG	4	2	8	3	32	5	0.5	-1	8	3	4	2	BP
Santa_Cruz_T2	2108.9	POS	2560	POS	POS	1280	POS	POS	640	POS	POS	320	POS	NEG	2	1	4	2	8	3	0.5	-1	4	2	2	1	BP
Santa_Cruz_T2	5281	POS	20480	POS	POS	10240	POS	POS	2560	POS	POS	1280	POS	POS	2	1	8	3	16	4	0.25	-2	8	3	2	1	BP
Santa_Cruz_T2	1054.5	POS	640	POS	POS	160	POS	NEG	160	POS	NEG	40	POS	NEG	4	2	4	2	16	4	1	0	4	2	4	2	BP
Santa_Cruz_T2	614.86	POS	1280	POS	POS	640	POS	POS	640	POS	POS	320	POS	NEG	2	1	2	1	4	2	1	0	2	1	2	1	BP
Santa_Cruz_T2	377.11	POS	640	POS	POS	80	POS	NEG	80	POS	NEG	80	POS	NEG	8	3	8	3	8	3	1	0	1	0	1	0	BP
Santa_Cruz_T2	236.04	POS	160	POS	NEG	40	POS	NEG	80	POS	NEG	10	NEG	NEG	4	2	2	1	16	4	2	1	4	2	8	3	BP
Santa_Cruz_T2	310.28	POS	40	POS	NEG	40	POS	NEG	20	POS	NEG	40	POS	NEG	1	0	2	1	1	0	0.5	-1	1	0	0.5	-1	OM
Santa_Cruz_T2	31.183	DOU	20	POS	NEG	40	POS	NEG	20	POS	NEG	10	NEG	NEG	0.5	-1	1	0	2	1	0.5	-1	4	2	2	1	BR
Santa_Cruz_T2	707.88	POS	640	POS	POS	160	POS	NEG	160	POS	NEG	20	POS	NEG	4	2	4	2	32	5	1	0	8	3	8	3	BP
Santa_Cruz_T2	117.54	POS	40	POS	NEG	20	POS	NEG	20	POS	NEG	10	NEG	NEG	2	1	2	1	4	2	1	0	2	1	2	1	BP
Santa_Cruz_T2	838.79	POS	1280	POS	POS	160	POS	NEG	160	POS	NEG	160	POS	NEG	8	3	8	3	8	3	1	0	1	0	1	0	BP
Santa_Cruz_T2	1141.8	POS	2560	POS	POS	640	POS	POS	1280	POS	POS	80	POS	NEG	4	2	2	1	32	5	2	1	8	3	16	4	BP
Santa_Cruz_T2	718.63	POS	160	POS	NEG	320	POS	NEG	80	POS	NEG	40	POS	NEG	0.5	-1	2	1	4	2	0.25	-2	8	3	2	1	BR
Santa_Cruz_T2	1044.8	POS	1280	POS	POS	320	POS	NEG	160	POS	NEG	80	POS	NEG	4	2	8	3	16	4	0.5	-1	4	2	2	1	BP
Santa_Cruz_T2	2002.9	POS	1280	POS	POS	1280	POS	POS	1280	POS	POS	160	POS	NEG	1	0	1	0	8	3	1	0	8	3	8	3	BP
Santa_Cruz_T2	2146.6	POS	2560	POS	POS	1280	POS	POS	640	POS	POS	320	POS	NEG	2	1	4	2	8	3	0.5	-1	4	2	2	1	BP
Santa_Cruz_T2	1656	POS	640	POS	POS	160	POS	NEG	640	POS	POS	20	POS	NEG	4	2	1	0	32	5	4	2	8	3	32	5	BP
Santa_Cruz_T2	197.85	POS	320	POS	NEG	80	POS	NEG	80	POS	NEG	10	NEG	NEG	4	2	4	2	32	5	1	0	8	3	8	3	BP
Santa_Cruz_T2	1780.5	POS	2560	POS	POS	640	POS	POS	640	POS	POS	80	POS	NEG	4	2	4	2	32	5	1	0	8	3	8	3	BP
Santa_Cruz_T2	1141.6	POS	1280	POS	POS	2560	POS	POS	320	POS	NEG	80	POS	NEG	0.5	-1	4	2	16	4	0.125	-3	32	5	4	2	BR
Santa_Cruz_T2	27.813	DOU	10	NEG	NEG	10	NEG	NEG	10	NEG	NEG	10	NEG	NEG	1	0	1	0	1	0	1	0	1	0	1	0	NEG
Santa_Cruz_T2	21.991	NEG	10	NEG	NEG	10	NEG	NEG	10	NEG	NEG	10	NEG	NEG	1	0	1	0	1	0	1	0	1	0	1	0	NEG_ELISA
Santa_Cruz_T2	297.32	POS	320	POS	NEG	160	POS	NEG	160	POS	NEG	20	POS	NEG	2	1	2	1	16	4	1	0	8	3	8	3	BP
Santa_Cruz_T2	2261.1	POS	5120	POS	POS	2560	POS	POS	1280	POS	POS	160	POS	NEG	2	1	4	2	32	5	0.5	-1	16	4	8	3	BP
Santa_Cruz_T2	208.02	POS	20	POS	NEG	10	NEG	NEG	20	POS	NEG	10	NEG	NEG	2	1	1	0	2	1	2	1	1	0	2	1	BP
Santa_Cruz_T2	1374.6	POS	320	POS	NEG	160	POS	NEG	160	POS	NEG	40	POS	NEG	2	1	2	1	8	3	1	0	4	2	4	2	BP
Santa_Cruz_T2	436.48	POS	1280	POS	POS	80	POS	NEG	320	POS	NEG	20	POS	NEG	16	4	4	2	64	6	4	2	4	2	16	4	BP
Santa_Cruz_T2	537.14	POS	320	POS	NEG	320	POS	NEG	320	POS	NEG	10	NEG	NEG	1	0	1	0	32	5	1	0	32	5	32	5	BP
Santa_Cruz_T2	7265.8	POS	10240	POS	POS	2560	POS	POS	1280	POS	POS	160	POS	NEG	4	2	8	3	64	6	0.5	-1	16	4	8	3	BP
Santa_Cruz_T2	1416.8	POS	1280	POS	POS	2560	POS	POS	640	POS	POS	640	POS	POS	0.5	-1	2	1	2	1	0.25	-2	4	2	1	0	BR
Santa_Cruz_T2	238.34	POS	320	POS	NEG	40	POS	NEG	80	POS	NEG	20	POS	NEG	8	3	4	2	16	4	2	1	2	1	4	2	BP
Santa_Cruz_T2	1008.5	POS	1280	POS	POS	320	POS	NEG	160	POS	NEG	80	POS	NEG	4	2	8	3	16	4	0.5	-1	4	2	2	1	BP
Santa_Cruz_T2	215.7	POS	80	POS	NEG	160	POS	NEG	40	POS	NEG	10	NEG	NEG	0.5	-1	2	1	8	3	0.25	-2	16	4	4	2	BR
Santa_Cruz_T2	870.3	POS	320	POS	NEG	640	POS	POS	320	POS	NEG	40	POS	NEG	0.5	-1	1	0	8	3	0.5	-1	16	4	8	3	BR
Santa_Cruz_T2	535.07	POS	1280	POS	POS	320	POS	NEG	320	POS	NEG	40	POS	NEG	4	2	4	2	32	5	1	0	8	3	8	3	BP
Santa_Cruz_T2	230.28	POS	160	POS	NEG	80	POS	NEG	80	POS	NEG	10	NEG	NEG	2	1	2	1	16	4	1	0	8	3	8	3	BP
Santa_Cruz_T2	4453.9	POS	5120	POS	POS	10240	POS	POS	1280	POS	POS	2560	POS	POS	0.5	-1	4	2	2	1	0.125	-3	4	2	0.5	-1	BR
Santa_Cruz_T2	703.34	POS	640	POS	POS	320	POS	NEG	640	POS	POS	80	POS	NEG	2	1	1	0	8	3	2	1	4	2	8	3	BP
Santa_Cruz_T2	62.133	POS	40	POS	NEG	10	NEG	NEG	10	NEG	NEG	10	NEG	NEG	4	2	4	2	4	2	1	0	1	0	1	0	BP
Santa_Cruz_T2	322.03	POS	320	POS	NEG	160	POS	NEG	160	POS	NEG	40	POS	NEG	2	1	2	1	8	3	1	0	4	2	4	2	BP
Santa_Cruz_T2	1093.3	POS	640	POS	POS	1280	POS	POS	320	POS	NEG	40	POS	NEG	0.5	-1	2	1	16	4	0.25	-2	32	5	8	3	BR
Santa_Cruz_T2	2171.5	POS	1280	POS	POS	1280	POS	POS	1280	POS	POS	160	POS	NEG	1	0	1	0	8	3	1	0	8	3	8	3	BP
Santa_Cruz_T2	147.57	POS	80	POS	NEG	160	POS	NEG	160	POS	NEG	20	POS	NEG	0.5	-1	0.5	-1	4	2	1	0	8	3	8	3	BR
Santa_Cruz_T2	950.17	POS	640	POS	POS	5120	POS	POS	320	POS	NEG	80	POS	NEG	0.125	-3	2	1	8	3	0.0625	-4	64	6	4	2	BR
Santa_Cruz_T2	6268.5	POS	5120	POS	POS	5120	POS	POS	2560	POS	POS	1280	POS	POS	1	0	2	1	4	2	0.5	-1	4	2	2	1	BP
Santa_Cruz_T2	3738.3	POS	2560	POS	POS	10240	POS	POS	2560	POS	POS	320	POS	NEG	0.25	-2	1	0	8	3	0.25	-2	32	5	8	3	BR
Santa_Cruz_T2	1323.5	POS	2560	POS	POS	2560	POS	POS	320	POS	NEG	80	POS	NEG	1	0	8	3	32	5	0.125	-3	32	5	4	2	BP
Santa_Cruz_T2	244.73	POS	160	POS	NEG	160	POS	NEG	320	POS	NEG	10	NEG	NEG	1	0	0.5	-1	16	4	2	1	16	4	32	5	IN
Santa_Cruz_T2	235	POS	640	POS	POS	5120	POS	POS	320	POS	NEG	20	POS	NEG	0.125	-3	2	1	32	5	0.0625	-4	256	8	16	4	BR
Santa_Cruz_T2	1200	POS	640	POS	POS	1280	POS	POS	160	POS	NEG	20	POS	NEG	0.5	-1	4	2	32	5	0.125	-3	64	6	8	3	BR
Santa_Cruz_T2	1630.6	POS	1280	POS	POS	5120	POS	POS	320	POS	NEG	1280	POS	POS	0.25	-2	4	2	1	0	0.0625	-4	4	2	0.25	-2	BR
Santa_Cruz_T2	974.2	POS	1280	POS	POS	2560	POS	POS	320	POS	NEG	160	POS	NEG	0.5	-1	4	2	8	3	0.125	-3	16	4	2	1	BR
Santa_Cruz_T2	342	POS	320	POS	NEG	1280	POS	POS	80	POS	NEG	40	POS	NEG	0.25	-2	4	2	8	3	0.0625	-4	32	5	2	1	BR
Santa_Cruz_T2	6824.6	POS	5120	POS	POS	10240	POS	POS	640	POS	POS	640	POS	POS	0.5	-1	8	3	8	3	0.0625	-4	16	4	1	0	BR
Santa_Cruz_T2	4453.1	POS	5120	POS	POS	10240	POS	POS	640	POS	POS	80	POS	NEG	0.5	-1	8	3	64	6	0.0625	-4	128	7	8	3	BR
Santa_Cruz_T2	834	POS	1280	POS	POS	10240	POS	POS	320	POS	NEG	80	POS	NEG	0.125	-3	4	2	16	4	0.03125	-5	128	7	4	2	BR
Santa_Cruz_T2	1511.6	POS	1280	POS	POS	10240	POS	POS	640	POS	POS	80	POS	NEG	0.125	-3	2	1	16	4	0.0625	-4	128	7	8	3	BR
Santa_Cruz_T2	1217	POS	320	POS	NEG	2560	POS	POS	160	POS	NEG	40	POS	NEG	0.125	-3	2	1	8	3	0.0625	-4	64	6	4	2	BR
Santa_Cruz_T2	6936.2	POS	5120	POS	POS	10240	POS	POS	640	POS	POS	640	POS	POS	0.5	-1	8	3	8	3	0.0625	-4	16	4	1	0	BR
Santa_Cruz_T2	342	POS	80	POS	NEG	1280	POS	POS	80	POS	NEG	20	POS	NEG	0.0625	-4	1	0	4	2	0.0625	-4	64	6	4	2	BR
Santa_Cruz_T2	204	POS	160	POS	NEG	1280	POS	POS	40	POS	NEG	10	NEG	NEG	0.125	-3	4	2	16	4	0.03125	-5	128	7	4	2	BR
Santa_Cruz_T2	236	POS	80	POS	NEG	160	POS	NEG	20	POS	NEG	10	NEG	NEG	0.5	-1	4	2	8	3	0.125	-3	16	4	2	1	BR
Santa_Cruz_T2	3289.3	POS	2560	POS	POS	10240	POS	POS	320	POS	NEG	160	POS	NEG	0.25	-2	8	3	16	4	0.03125	-5	64	6	2	1	BR
Santa_Cruz_T2	967.27	POS	1280	POS	POS	10240	POS	POS	160	POS	NEG	20	POS	NEG	0.125	-3	8	3	64	6	0.015625	-6	512	9	8	3	BR
Santa_Cruz_T2	1593.8	POS	2560	POS	POS	20480	POS	POS	320	POS	NEG	160	POS	NEG	0.125	-3	8	3	16	4	0.015625	-6	128	7	2	1	BR
Santa_Cruz_T2	180	POS	320	POS	NEG	1280	POS	POS	80	POS	NEG	10	NEG	NEG	0.25	-2	4	2	32	5	0.0625	-4	128	7	8	3	BR
Santa_Cruz_T2	320	POS	640	POS	POS	10240	POS	POS	160	POS	NEG	40	POS	NEG	0.0625	-4	4	2	16	4	0.015625	-6	256	8	4	2	BR
Santa_Cruz_T2	896.97	POS	1280	POS	POS	2560	POS	POS	160	POS	NEG	40	POS	NEG	0.5	-1	8	3	32	5	0.0625	-4	64	6	4	2	BR
Santa_Cruz_T2	1937.7	POS	1280	POS	POS	2560	POS	POS	160	POS	NEG	160	POS	NEG	0.5	-1	8	3	8	3	0.0625	-4	16	4	1	0	BR
Santa_Cruz_T2	832.22	POS	320	POS	NEG	5120	POS	POS	320	POS	NEG	80	POS	NEG	0.0625	-4	1	0	4	2	0.0625	-4	64	6	4	2	BR
Santa_Cruz_T2	274.63	POS	160	POS	NEG	640	POS	POS	20	POS	NEG	10	NEG	NEG	0.25	-2	8	3	16	4	0.03125	-5	64	6	2	1	BR
Santa_Cruz_T2	209.58	POS	160	POS	NEG	320	POS	NEG	40	POS	NEG	10	NEG	NEG	0.5	-1	4	2	16	4	0.125	-3	32	5	4	2	BR
Santa_Cruz_T2	194.82	POS	160	POS	NEG	320	POS	NEG	80	POS	NEG	40	POS	NEG	0.5	-1	2	1	4	2	0.25	-2	8	3	2	1	BR
Santa_Cruz_T2	216.38	POS	80	POS	NEG	1280	POS	POS	10	NEG	NEG	20	POS	NEG	0.0625	-4	8	3	4	2	0.0078125	-7	64	6	0.5	-1	BR
Santa_Cruz_T2	32.929	DOU	10	NEG	NEG	10	NEG	NEG	10	NEG	NEG	10	NEG	NEG	1	0	1	0	1	0	1	0	1	0	1	0	NEG
Santa_Cruz_T2	2190.4	POS	1280	POS	POS	5120	POS	POS	640	POS	POS	320	POS	NEG	0.25	-2	2	1	4	2	0.125	-3	16	4	2	1	BR
Santa_Cruz_T2	2975.7	POS	2560	POS	POS	10240	POS	POS	640	POS	POS	80	POS	NEG	0.25	-2	4	2	32	5	0.0625	-4	128	7	8	3	BR
Santa_Cruz_T2	563.2	POS	160	POS	NEG	1280	POS	POS	160	POS	NEG	40	POS	NEG	0.125	-3	1	0	4	2	0.125	-3	32	5	4	2	BR
Santa_Cruz_T2	935.76	POS	320	POS	NEG	2560	POS	POS	320	POS	NEG	10	NEG	NEG	0.125	-3	1	0	32	5	0.125	-3	256	8	32	5	BR
Santa_Cruz_T2	4541.7	POS	2560	POS	POS	20480	POS	POS	320	POS	NEG	80	POS	NEG	0.125	-3	8	3	32	5	0.015625	-6	256	8	4	2	BR
Santa_Cruz_T2	361.72	POS	320	POS	NEG	1280	POS	POS	80	POS	NEG	20	POS	NEG	0.25	-2	4	2	16	4	0.0625	-4	64	6	4	2	BR
Santa_Cruz_T2	4195.5	POS	5120	POS	POS	20480	POS	POS	1280	POS	POS	320	POS	NEG	0.25	-2	4	2	16	4	0.0625	-4	64	6	4	2	BR
Santa_Cruz_T2	1153.9	POS	640	POS	POS	2560	POS	POS	320	POS	NEG	20	POS	NEG	0.25	-2	2	1	32	5	0.125	-3	128	7	16	4	BR
Santa_Cruz_T2	76.168	POS	160	POS	NEG	640	POS	POS	20	POS	NEG	10	NEG	NEG	0.25	-2	8	3	16	4	0.03125	-5	64	6	2	1	BR
Santa_Cruz_T2	149.17	POS	160	POS	NEG	160	POS	NEG	80	POS	NEG	80	POS	NEG	1	0	2	1	2	1	0.5	-1	2	1	1	0	BP
Santa_Cruz_T2	2070.8	POS	1280	POS	POS	2560	POS	POS	640	POS	POS	20	POS	NEG	0.5	-1	2	1	64	6	0.25	-2	128	7	32	5	BR
Santa_Cruz_T2	6458.5	POS	10240	POS	POS	20480	POS	POS	1280	POS	POS	640	POS	POS	0.5	-1	8	3	16	4	0.0625	-4	32	5	2	1	BR
Santa_Cruz_T2	19996	POS	40960	POS	POS	20480	POS	POS	10240	POS	POS	320	POS	NEG	2	1	4	2	128	7	0.5	-1	64	6	32	5	BP
Santa_Cruz_T2	3212	POS	1280	POS	POS	20480	POS	POS	320	POS	NEG	80	POS	NEG	0.0625	-4	4	2	16	4	0.015625	-6	256	8	4	2	BR
Santa_Cruz_T2	16.759	NEG	10	NEG	NEG	10	NEG	NEG	10	NEG	NEG	10	NEG	NEG	1	0	1	0	1	0	1	0	1	0	1	0	NEG_ELISA
Santa_Cruz_T2	875.15	POS	160	POS	NEG	5120	POS	POS	40	POS	NEG	20	POS	NEG	0.03125	-5	4	2	8	3	0.0078125	-7	256	8	2	1	BR
Santa_Cruz_T2	1890.1	POS	640	POS	POS	5120	POS	POS	320	POS	NEG	80	POS	NEG	0.125	-3	2	1	8	3	0.0625	-4	64	6	4	2	BR
Santa_Cruz_T2	33318	POS	10240	POS	POS	10240	POS	POS	20480	POS	POS	5120	POS	POS	1	0	0.5	-1	2	1	2	1	2	1	4	2	IN
Santa_Cruz_T2	4272.8	POS	1280	POS	POS	10240	POS	POS	640	POS	POS	160	POS	NEG	0.125	-3	2	1	8	3	0.0625	-4	64	6	4	2	BR
Santa_Cruz_T2	7464.7	POS	5120	POS	POS	20480	POS	POS	2560	POS	POS	640	POS	POS	0.25	-2	2	1	8	3	0.125	-3	32	5	4	2	BR
Santa_Cruz_T2	1614.3	POS	1280	POS	POS	5120	POS	POS	320	POS	NEG	20	POS	NEG	0.25	-2	4	2	64	6	0.0625	-4	256	8	16	4	BR
Santa_Cruz_T2	37.975	POS	80	POS	NEG	160	POS	NEG	40	POS	NEG	10	NEG	NEG	0.5	-1	2	1	8	3	0.25	-2	16	4	4	2	BR
Santa_Cruz_T2	4969	POS	10240	POS	POS	40960	POS	POS	1280	POS	POS	160	POS	NEG	0.25	-2	8	3	64	6	0.03125	-5	256	8	8	3	BR
Santa_Cruz_T2	858.18	POS	640	POS	POS	10240	POS	POS	320	POS	NEG	40	POS	NEG	0.0625	-4	2	1	16	4	0.03125	-5	256	8	8	3	BR
Santa_Cruz_T2	18802	POS	20480	POS	POS	20480	POS	POS	5120	POS	POS	2560	POS	POS	1	0	4	2	8	3	0.25	-2	8	3	2	1	BP
Santa_Cruz_T2	8166.7	POS	5120	POS	POS	20480	POS	POS	1280	POS	POS	640	POS	POS	0.25	-2	4	2	8	3	0.0625	-4	32	5	2	1	BR
Santa_Cruz_T2	1399.5	POS	1280	POS	POS	5120	POS	POS	640	POS	POS	80	POS	NEG	0.25	-2	2	1	16	4	0.125	-3	64	6	8	3	BR
Santa_Cruz_T2	1345.2	POS	1280	POS	POS	10240	POS	POS	320	POS	NEG	40	POS	NEG	0.125	-3	4	2	32	5	0.03125	-5	256	8	8	3	BR
Santa_Cruz_T2	2413.2	POS	1280	POS	POS	5120	POS	POS	640	POS	POS	20	POS	NEG	0.25	-2	2	1	64	6	0.125	-3	256	8	32	5	BR
Santa_Cruz_T2	865.45	POS	640	POS	POS	5120	POS	POS	80	POS	NEG	40	POS	NEG	0.125	-3	8	3	16	4	0.015625	-6	128	7	2	1	BR
Santa_Cruz_T2	607	POS	640	POS	POS	2560	POS	POS	80	POS	NEG	80	POS	NEG	0.25	-2	8	3	8	3	0.03125	-5	32	5	1	0	BR
Santa_Cruz_T2	236.58	POS	320	POS	NEG	320	POS	NEG	640	POS	POS	40	POS	NEG	1	0	0.5	-1	8	3	2	1	8	3	16	4	IN
Santa_Cruz_T2	1619.1	POS	2560	POS	POS	1280	POS	POS	320	POS	NEG	160	POS	NEG	2	1	8	3	16	4	0.25	-2	8	3	2	1	BP
Santa_Cruz_T2	739.86	POS	1280	POS	POS	640	POS	POS	320	POS	NEG	40	POS	NEG	2	1	4	2	32	5	0.5	-1	16	4	8	3	BP
Santa_Cruz_T2	125	POS	320	POS	NEG	640	POS	POS	80	POS	NEG	40	POS	NEG	0.5	-1	4	2	8	3	0.125	-3	16	4	2	1	BR
Santa_Cruz_T2	683.12	POS	1280	POS	POS	2560	POS	POS	160	POS	NEG	160	POS	NEG	0.5	-1	8	3	8	3	0.0625	-4	16	4	1	0	BR
Santa_Cruz_T2	6587.2	POS	10240	POS	POS	20480	POS	POS	2560	POS	POS	640	POS	POS	0.5	-1	4	2	16	4	0.125	-3	32	5	4	2	BR
Santa_Cruz_T2	236.77	POS	160	POS	NEG	5120	POS	POS	80	POS	NEG	40	POS	NEG	0.03125	-5	2	1	4	2	0.015625	-6	128	7	2	1	BR
Santa_Cruz_T2	2067.7	POS	2560	POS	POS	20480	POS	POS	320	POS	NEG	320	POS	NEG	0.125	-3	8	3	8	3	0.015625	-6	64	6	1	0	BR
Santa_Cruz_T2	2343.9	POS	2560	POS	POS	20480	POS	POS	640	POS	POS	320	POS	NEG	0.125	-3	4	2	8	3	0.03125	-5	64	6	2	1	BR
Santa_Cruz_T2	2319.3	POS	2560	POS	POS	5120	POS	POS	640	POS	POS	160	POS	NEG	0.5	-1	4	2	16	4	0.125	-3	32	5	4	2	BR
Santa_Cruz_T2	911.52	POS	640	POS	POS	1280	POS	POS	320	POS	NEG	160	POS	NEG	0.5	-1	2	1	4	2	0.25	-2	8	3	2	1	BR
Santa_Cruz_T2	209.38	POS	1280	POS	POS	640	POS	POS	160	POS	NEG	40	POS	NEG	2	1	8	3	32	5	0.25	-2	16	4	4	2	BP
Santa_Cruz_T2	1103	POS	640	POS	POS	5120	POS	POS	320	POS	NEG	160	POS	NEG	0.125	-3	2	1	4	2	0.0625	-4	32	5	2	1	BR
Santa_Cruz_T2	230	POS	80	POS	NEG	2560	POS	POS	80	POS	NEG	20	POS	NEG	0.03125	-5	1	0	4	2	0.03125	-5	128	7	4	2	BR
Santa_Cruz_T2	935.76	POS	1280	POS	POS	2560	POS	POS	320	POS	NEG	80	POS	NEG	0.5	-1	4	2	16	4	0.125	-3	32	5	4	2	BR
Santa_Cruz_T2	2429.6	POS	2560	POS	POS	10240	POS	POS	640	POS	POS	160	POS	NEG	0.25	-2	4	2	16	4	0.0625	-4	64	6	4	2	BR
Santa_Cruz_T2	945.45	POS	640	POS	POS	10240	POS	POS	320	POS	NEG	160	POS	NEG	0.0625	-4	2	1	4	2	0.03125	-5	64	6	2	1	BR
Santa_Cruz_T2	655.89	POS	5120	POS	POS	2560	POS	POS	640	POS	POS	40	POS	NEG	2	1	8	3	128	7	0.25	-2	64	6	16	4	BP
Santa_Cruz_T2	3959.7	POS	2560	POS	POS	10240	POS	POS	1280	POS	POS	640	POS	POS	0.25	-2	2	1	4	2	0.125	-3	16	4	2	1	BR
Santa_Cruz_T2	1772.3	POS	1280	POS	POS	10240	POS	POS	640	POS	POS	1280	POS	POS	0.125	-3	2	1	1	0	0.0625	-4	8	3	0.5	-1	BR
Santa_Cruz_T2	1198.3	POS	1280	POS	POS	20480	POS	POS	640	POS	POS	640	POS	POS	0.0625	-4	2	1	2	1	0.03125	-5	32	5	1	0	BR
Santa_Cruz_T2	598	POS	2560	POS	POS	5120	POS	POS	640	POS	POS	40	POS	NEG	0.5	-1	4	2	64	6	0.125	-3	128	7	16	4	BR
Santa_Cruz_T2	2680.4	POS	2560	POS	POS	20480	POS	POS	320	POS	NEG	160	POS	NEG	0.125	-3	8	3	16	4	0.015625	-6	128	7	2	1	BR
Santa_Cruz_T2	680.85	POS	640	POS	POS	1280	POS	POS	160	POS	NEG	80	POS	NEG	0.5	-1	4	2	8	3	0.125	-3	16	4	2	1	BR
Santa_Cruz_T2	866.95	POS	1280	POS	POS	1280	POS	POS	320	POS	NEG	80	POS	NEG	1	0	4	2	16	4	0.25	-2	16	4	4	2	BP
Santa_Cruz_T2	773.24	POS	640	POS	POS	10240	POS	POS	640	POS	POS	40	POS	NEG	0.0625	-4	1	0	16	4	0.0625	-4	256	8	16	4	BR
Santa_Cruz_T2	963.28	POS	1280	POS	POS	2560	POS	POS	160	POS	NEG	80	POS	NEG	0.5	-1	8	3	16	4	0.0625	-4	32	5	2	1	BR
Santa_Cruz_T2	816.97	POS	160	POS	NEG	1280	POS	POS	80	POS	NEG	20	POS	NEG	0.125	-3	2	1	8	3	0.0625	-4	64	6	4	2	BR
Santa_Cruz_T2	1540.9	POS	640	POS	POS	2560	POS	POS	160	POS	NEG	40	POS	NEG	0.25	-2	4	2	16	4	0.0625	-4	64	6	4	2	BR
Santa_Cruz_T2	967.27	POS	640	POS	POS	2560	POS	POS	320	POS	NEG	80	POS	NEG	0.25	-2	2	1	8	3	0.125	-3	32	5	4	2	BR
Santa_Cruz_T2	247	POS	160	POS	NEG	640	POS	POS	20	POS	NEG	40	POS	NEG	0.25	-2	8	3	4	2	0.03125	-5	16	4	0.5	-1	BR
Santa_Cruz_T2	3175	POS	2560	POS	POS	20480	POS	POS	640	POS	POS	80	POS	NEG	0.125	-3	4	2	32	5	0.03125	-5	256	8	8	3	BR
Santa_Cruz_T2	947.88	POS	160	POS	NEG	2560	POS	POS	80	POS	NEG	20	POS	NEG	0.0625	-4	2	1	8	3	0.03125	-5	128	7	4	2	BR
Santa_Cruz_T2	267.96	POS	80	POS	NEG	640	POS	POS	80	POS	NEG	10	NEG	NEG	0.125	-3	1	0	8	3	0.125	-3	64	6	8	3	BR
Santa_Cruz_T2	7499.8	POS	2560	POS	POS	20480	POS	POS	2560	POS	POS	640	POS	POS	0.125	-3	1	0	4	2	0.125	-3	32	5	4	2	BR
Bermejo	13214	POS	5120	POS	POS	2560	POS	POS	2560	POS	POS	640	POS	POS	2	1	2	1	8	3	1	0	4	2	4	2	BP
Bermejo	735.86	POS	320	POS	NEG	80	POS	NEG	320	POS	NEG	20	POS	NEG	4	2	1	0	16	4	4	2	4	2	16	4	BP
Bermejo	1320.4	POS	160	POS	NEG	320	POS	NEG	640	POS	POS	40	POS	NEG	0.5	-1	0.25	-2	4	2	2	1	8	3	16	4	IN
Bermejo	5000.8	POS	2560	POS	POS	5120	POS	POS	1280	POS	POS	320	POS	NEG	0.5	-1	2	1	8	3	0.25	-2	16	4	4	2	BR
Bermejo	2825.2	POS	320	POS	NEG	640	POS	POS	320	POS	NEG	160	POS	NEG	0.5	-1	1	0	2	1	0.5	-1	4	2	2	1	BR
Bermejo	1560.2	POS	640	POS	POS	320	POS	NEG	1280	POS	POS	20	POS	NEG	2	1	0.5	-1	32	5	4	2	16	4	64	6	IN
Bermejo	5305.5	POS	1280	POS	POS	2560	POS	POS	1280	POS	POS	80	POS	NEG	0.5	-1	1	0	16	4	0.5	-1	32	5	16	4	BR
Bermejo	292.09	POS	80	POS	NEG	160	POS	NEG	80	POS	NEG	20	POS	NEG	0.5	-1	1	0	4	2	0.5	-1	8	3	4	2	BR
Bermejo	2365.6	POS	1280	POS	POS	2560	POS	POS	640	POS	POS	160	POS	NEG	0.5	-1	2	1	8	3	0.25	-2	16	4	4	2	BR
Bermejo	678.79	POS	320	POS	NEG	1280	POS	POS	160	POS	NEG	20	POS	NEG	0.25	-2	2	1	16	4	0.125	-3	64	6	8	3	BR
Bermejo	2507	POS	640	POS	POS	640	POS	POS	1280	POS	POS	40	POS	NEG	1	0	0.5	-1	16	4	2	1	16	4	32	5	IN
Bermejo	1911.2	POS	320	POS	NEG	1280	POS	POS	320	POS	NEG	80	POS	NEG	0.25	-2	1	0	4	2	0.25	-2	16	4	4	2	BR
Bermejo	4847.1	POS	640	POS	POS	5120	POS	POS	1280	POS	POS	160	POS	NEG	0.125	-3	0.5	-1	4	2	0.25	-2	32	5	8	3	BR
Bermejo	4531.9	POS	320	POS	NEG	5120	POS	POS	320	POS	NEG	160	POS	NEG	0.0625	-4	1	0	2	1	0.0625	-4	32	5	2	1	BR
Bermejo	2156.1	POS	320	POS	NEG	1280	POS	POS	640	POS	POS	20	POS	NEG	0.25	-2	0.5	-1	16	4	0.5	-1	64	6	32	5	BR
Bermejo	3255.7	POS	640	POS	POS	5120	POS	POS	1280	POS	POS	160	POS	NEG	0.125	-3	0.5	-1	4	2	0.25	-2	32	5	8	3	BR
Bermejo	103.58	POS	20	POS	NEG	320	POS	NEG	40	POS	NEG	10	NEG	NEG	0.0625	-4	0.5	-1	2	1	0.125	-3	32	5	4	2	BR
Bermejo	3132.7	POS	2560	POS	POS	2560	POS	POS	2560	POS	POS	320	POS	NEG	1	0	1	0	8	3	1	0	8	3	8	3	BP
Bermejo	5579.3	POS	2560	POS	POS	10240	POS	POS	2560	POS	POS	320	POS	NEG	0.25	-2	1	0	8	3	0.25	-2	32	5	8	3	BR
Bermejo	13580	POS	2560	POS	POS	10240	POS	POS	5120	POS	POS	320	POS	NEG	0.25	-2	0.5	-1	8	3	0.5	-1	32	5	16	4	BR
Bermejo	6783.4	POS	640	POS	POS	320	POS	NEG	320	POS	NEG	40	POS	NEG	2	1	2	1	16	4	1	0	8	3	8	3	BP
Bermejo	1605.7	POS	160	POS	NEG	640	POS	POS	80	POS	NEG	10	NEG	NEG	0.25	-2	2	1	16	4	0.125	-3	64	6	8	3	BR
Bermejo	6956.5	POS	640	POS	POS	2560	POS	POS	640	POS	POS	20	POS	NEG	0.25	-2	1	0	32	5	0.25	-2	128	7	32	5	BR
Bermejo	3328.8	POS	640	POS	POS	2560	POS	POS	640	POS	POS	40	POS	NEG	0.25	-2	1	0	16	4	0.25	-2	64	6	16	4	BR
Bermejo	2971.3	POS	320	POS	NEG	1280	POS	POS	320	POS	NEG	320	POS	NEG	0.25	-2	1	0	1	0	0.25	-2	4	2	1	0	BR
Bermejo	3831.2	POS	1280	POS	POS	2560	POS	POS	1280	POS	POS	640	POS	POS	0.5	-1	1	0	2	1	0.5	-1	4	2	2	1	BR
Bermejo	6973.3	POS	2560	POS	POS	10240	POS	POS	2560	POS	POS	640	POS	POS	0.25	-2	1	0	4	2	0.25	-2	16	4	4	2	BR
Bermejo	7309.9	POS	1280	POS	POS	5120	POS	POS	1280	POS	POS	160	POS	NEG	0.25	-2	1	0	8	3	0.25	-2	32	5	8	3	BR
Bermejo	618.52	POS	320	POS	NEG	640	POS	POS	80	POS	NEG	40	POS	NEG	0.5	-1	4	2	8	3	0.125	-3	16	4	2	1	BR
Bermejo	3216	POS	640	POS	POS	1280	POS	POS	640	POS	POS	20	POS	NEG	0.5	-1	1	0	32	5	0.5	-1	64	6	32	5	BR
Bermejo	1863.2	POS	320	POS	NEG	640	POS	POS	640	POS	POS	20	POS	NEG	0.5	-1	0.5	-1	16	4	1	0	32	5	32	5	BR
Bermejo	830.88	POS	80	POS	NEG	160	POS	NEG	320	POS	NEG	80	POS	NEG	0.5	-1	0.25	-2	1	0	2	1	2	1	4	2	IN
Bermejo	216.79	POS	80	POS	NEG	80	POS	NEG	160	POS	NEG	10	NEG	NEG	1	0	0.5	-1	8	3	2	1	8	3	16	4	IN
Bermejo	1452.1	POS	320	POS	NEG	640	POS	POS	640	POS	POS	40	POS	NEG	0.5	-1	0.5	-1	8	3	1	0	16	4	16	4	BR
Bermejo	1457.5	POS	320	POS	NEG	640	POS	POS	320	POS	NEG	80	POS	NEG	0.5	-1	1	0	4	2	0.5	-1	8	3	4	2	BR
Bermejo	4702.4	POS	640	POS	POS	5120	POS	POS	2560	POS	POS	320	POS	NEG	0.125	-3	0.25	-2	2	1	0.5	-1	16	4	8	3	BR
Bermejo	1930.8	POS	320	POS	NEG	1280	POS	POS	640	POS	POS	80	POS	NEG	0.25	-2	0.5	-1	4	2	0.5	-1	16	4	8	3	BR
Bermejo	1155.9	POS	640	POS	POS	1280	POS	POS	320	POS	NEG	160	POS	NEG	0.5	-1	2	1	4	2	0.25	-2	8	3	2	1	BR
Bermejo	1345.6	POS	640	POS	POS	1280	POS	POS	640	POS	POS	160	POS	NEG	0.5	-1	1	0	4	2	0.5	-1	8	3	4	2	BR
Bermejo	2320.2	POS	640	POS	POS	1280	POS	POS	320	POS	NEG	40	POS	NEG	0.5	-1	2	1	16	4	0.25	-2	32	5	8	3	BR
Bermejo	137.96	POS	40	POS	NEG	40	POS	NEG	80	POS	NEG	10	NEG	NEG	1	0	0.5	-1	4	2	2	1	4	2	8	3	IN
Bermejo	3106.7	POS	640	POS	POS	5120	POS	POS	1280	POS	POS	320	POS	NEG	0.125	-3	0.5	-1	2	1	0.25	-2	16	4	4	2	BR
Bermejo	5973.3	POS	1280	POS	POS	1280	POS	POS	640	POS	POS	80	POS	NEG	1	0	2	1	16	4	0.5	-1	16	4	8	3	BP
Bermejo	1446.6	POS	320	POS	NEG	1280	POS	POS	640	POS	POS	160	POS	NEG	0.25	-2	0.5	-1	2	1	0.5	-1	8	3	4	2	BR
Bermejo	4220.5	POS	320	POS	NEG	2560	POS	POS	320	POS	NEG	20	POS	NEG	0.125	-3	1	0	16	4	0.125	-3	128	7	16	4	BR
Bermejo	3632.4	POS	320	POS	NEG	5120	POS	POS	320	POS	NEG	80	POS	NEG	0.0625	-4	1	0	4	2	0.0625	-4	64	6	4	2	BR
Bermejo	2459	POS	640	POS	POS	1280	POS	POS	320	POS	NEG	80	POS	NEG	0.5	-1	2	1	8	3	0.25	-2	16	4	4	2	BR
Bermejo	52.314	POS	10	NEG	NEG	20	POS	NEG	10	NEG	NEG	10	NEG	NEG	0.5	-1	1	0	1	0	0.5	-1	2	1	1	0	BR
Bermejo	1251.8	POS	80	POS	NEG	320	POS	NEG	160	POS	NEG	20	POS	NEG	0.25	-2	0.5	-1	4	2	0.5	-1	16	4	8	3	BR
Bermejo	1091.1	POS	80	POS	NEG	1280	POS	POS	40	POS	NEG	40	POS	NEG	0.0625	-4	2	1	2	1	0.03125	-5	32	5	1	0	BR
Bermejo	2717.6	POS	1280	POS	POS	5120	POS	POS	2560	POS	POS	320	POS	NEG	0.25	-2	0.5	-1	4	2	0.5	-1	16	4	8	3	BR
Bermejo	3374.9	POS	320	POS	NEG	2560	POS	POS	640	POS	POS	160	POS	NEG	0.125	-3	0.5	-1	2	1	0.25	-2	16	4	4	2	BR
Bermejo	1662.2	POS	160	POS	NEG	1280	POS	POS	320	POS	NEG	80	POS	NEG	0.125	-3	0.5	-1	2	1	0.25	-2	16	4	4	2	BR
Bermejo	225.92	POS	80	POS	NEG	320	POS	NEG	160	POS	NEG	40	POS	NEG	0.25	-2	0.5	-1	2	1	0.5	-1	8	3	4	2	BR
Bermejo	63.126	POS	20	POS	NEG	20	POS	NEG	40	POS	NEG	10	NEG	NEG	1	0	0.5	-1	2	1	2	1	2	1	4	2	IN
Bermejo	142.52	POS	80	POS	NEG	80	POS	NEG	160	POS	NEG	10	NEG	NEG	1	0	0.5	-1	8	3	2	1	8	3	16	4	IN
Bermejo	2393.4	POS	640	POS	POS	2560	POS	POS	320	POS	NEG	160	POS	NEG	0.25	-2	2	1	4	2	0.125	-3	16	4	2	1	BR
Bermejo	9184.6	POS	5120	POS	POS	5120	POS	POS	2560	POS	POS	1280	POS	POS	1	0	2	1	4	2	0.5	-1	4	2	2	1	BP
Bermejo	2759.9	POS	640	POS	POS	2560	POS	POS	320	POS	NEG	10	NEG	NEG	0.25	-2	2	1	64	6	0.125	-3	256	8	32	5	BR
Bermejo	4475.1	POS	1280	POS	POS	2560	POS	POS	1280	POS	POS	320	POS	NEG	0.5	-1	1	0	4	2	0.5	-1	8	3	4	2	BR
Bermejo	1807.7	POS	320	POS	NEG	640	POS	POS	320	POS	NEG	40	POS	NEG	0.5	-1	1	0	8	3	0.5	-1	16	4	8	3	BR
Bermejo	905.02	POS	320	POS	NEG	640	POS	POS	80	POS	NEG	20	POS	NEG	0.5	-1	4	2	16	4	0.125	-3	32	5	4	2	BR
Bermejo	730.22	POS	160	POS	NEG	1280	POS	POS	40	POS	NEG	20	POS	NEG	0.125	-3	4	2	8	3	0.03125	-5	64	6	2	1	BR
Bermejo	2905.9	POS	1280	POS	POS	640	POS	POS	640	POS	POS	320	POS	NEG	2	1	2	1	4	2	1	0	2	1	2	1	BP
Bermejo	13.977	NEG	10	NEG	NEG	10	NEG	NEG	10	NEG	NEG	10	NEG	NEG	1	0	1	0	1	0	1	0	1	0	1	0	NEG_ELISA
Bermejo	3155.8	POS	160	POS	NEG	2560	POS	POS	320	POS	NEG	160	POS	NEG	0.0625	-4	0.5	-1	1	0	0.125	-3	16	4	2	1	BR
Bermejo	1732.7	POS	160	POS	NEG	1280	POS	POS	80	POS	NEG	10	NEG	NEG	0.125	-3	2	1	16	4	0.0625	-4	128	7	8	3	BR
Bermejo	1343.1	POS	320	POS	NEG	640	POS	POS	160	POS	NEG	40	POS	NEG	0.5	-1	2	1	8	3	0.25	-2	16	4	4	2	BR
Bermejo	6369.1	POS	2560	POS	POS	5120	POS	POS	1280	POS	POS	640	POS	POS	0.5	-1	2	1	4	2	0.25	-2	8	3	2	1	BR
Bermejo	7513	POS	2560	POS	POS	5120	POS	POS	2560	POS	POS	640	POS	POS	0.5	-1	1	0	4	2	0.5	-1	8	3	4	2	BR
Bermejo	2098	POS	640	POS	POS	1280	POS	POS	160	POS	NEG	20	POS	NEG	0.5	-1	4	2	32	5	0.125	-3	64	6	8	3	BR
Bermejo	2320.2	POS	320	POS	NEG	2560	POS	POS	1280	POS	POS	80	POS	NEG	0.125	-3	0.25	-2	4	2	0.5	-1	32	5	16	4	BR
Bermejo	8.634	NEG	10	NEG	NEG	10	NEG	NEG	10	NEG	NEG	10	NEG	NEG	1	0	1	0	1	0	1	0	1	0	1	0	NEG_ELISA
Bermejo	3401.6	POS	1280	POS	POS	2560	POS	POS	1280	POS	POS	1280	POS	POS	0.5	-1	1	0	1	0	0.5	-1	2	1	1	0	BR
Bermejo	3144.3	POS	1280	POS	POS	5120	POS	POS	640	POS	POS	320	POS	NEG	0.25	-2	2	1	4	2	0.125	-3	16	4	2	1	BR
Bermejo	4.0151	NEG	10	NEG	NEG	10	NEG	NEG	10	NEG	NEG	10	NEG	NEG	1	0	1	0	1	0	1	0	1	0	1	0	NEG_ELISA
Bermejo	1499.6	POS	640	POS	POS	2560	POS	POS	160	POS	NEG	80	POS	NEG	0.25	-2	4	2	8	3	0.0625	-4	32	5	2	1	BR
Bermejo	2209.1	POS	160	POS	NEG	2560	POS	POS	640	POS	POS	160	POS	NEG	0.0625	-4	0.25	-2	1	0	0.25	-2	16	4	4	2	BR
Bermejo	1333	POS	80	POS	NEG	640	POS	POS	160	POS	NEG	40	POS	NEG	0.125	-3	0.5	-1	2	1	0.25	-2	16	4	4	2	BR
Bermejo	941.67	POS	40	POS	NEG	160	POS	NEG	20	POS	NEG	80	POS	NEG	0.25	-2	2	1	0.5	-1	0.125	-3	2	1	0.25	-2	BR
Bermejo	4695.6	POS	1280	POS	POS	20480	POS	POS	1280	POS	POS	320	POS	NEG	0.0625	-4	1	0	4	2	0.0625	-4	64	6	4	2	BR
Bermejo	5259.8	POS	2560	POS	POS	5120	POS	POS	320	POS	NEG	40	POS	NEG	0.5	-1	8	3	64	6	0.0625	-4	128	7	8	3	BR
Bermejo	319.87	POS	160	POS	NEG	640	POS	POS	160	POS	NEG	20	POS	NEG	0.25	-2	1	0	8	3	0.25	-2	32	5	8	3	BR
Bermejo	6789.6	POS	2560	POS	POS	10240	POS	POS	1280	POS	POS	160	POS	NEG	0.25	-2	2	1	16	4	0.125	-3	64	6	8	3	BR
Bermejo	7296.6	POS	640	POS	POS	2560	POS	POS	1280	POS	POS	320	POS	NEG	0.25	-2	0.5	-1	2	1	0.5	-1	8	3	4	2	BR
Bermejo	648.46	POS	160	POS	NEG	640	POS	POS	160	POS	NEG	40	POS	NEG	0.25	-2	1	0	4	2	0.25	-2	16	4	4	2	BR
Bermejo	2196.4	POS	640	POS	POS	5120	POS	POS	640	POS	POS	160	POS	NEG	0.125	-3	1	0	4	2	0.125	-3	32	5	4	2	BR
Bermejo	7628.5	POS	2560	POS	POS	10240	POS	POS	2560	POS	POS	640	POS	POS	0.25	-2	1	0	4	2	0.25	-2	16	4	4	2	BR
Bermejo	914.29	POS	320	POS	NEG	5120	POS	POS	640	POS	POS	20	POS	NEG	0.0625	-4	0.5	-1	16	4	0.125	-3	256	8	32	5	BR
Bermejo	3843.8	POS	640	POS	POS	5120	POS	POS	1280	POS	POS	640	POS	POS	0.125	-3	0.5	-1	1	0	0.25	-2	8	3	2	1	BR
Bermejo	3257.1	POS	640	POS	POS	10240	POS	POS	640	POS	POS	640	POS	POS	0.0625	-4	1	0	1	0	0.0625	-4	16	4	1	0	BR
Bermejo	627.39	POS	160	POS	NEG	320	POS	NEG	160	POS	NEG	80	POS	NEG	0.5	-1	1	0	2	1	0.5	-1	4	2	2	1	BR
Bermejo	1533.5	POS	640	POS	POS	1280	POS	POS	320	POS	NEG	80	POS	NEG	0.5	-1	2	1	8	3	0.25	-2	16	4	4	2	BR
Bermejo	5116.2	POS	320	POS	NEG	640	POS	POS	80	POS	NEG	640	POS	POS	0.5	-1	4	2	0.5	-1	0.125	-3	1	0	0.125	-3	OM
Bermejo	1916.3	POS	320	POS	NEG	1280	POS	POS	640	POS	POS	160	POS	NEG	0.25	-2	0.5	-1	2	1	0.5	-1	8	3	4	2	BR
Bermejo	4333.8	POS	1280	POS	POS	2560	POS	POS	2560	POS	POS	640	POS	POS	0.5	-1	0.5	-1	2	1	1	0	4	2	4	2	BR
Bermejo	2854.3	POS	1280	POS	POS	2560	POS	POS	1280	POS	POS	640	POS	POS	0.5	-1	1	0	2	1	0.5	-1	4	2	2	1	BR
Bermejo	1759.7	POS	160	POS	NEG	2560	POS	POS	320	POS	NEG	160	POS	NEG	0.0625	-4	0.5	-1	1	0	0.125	-3	16	4	2	1	BR
Bermejo	911.72	POS	80	POS	NEG	320	POS	NEG	640	POS	POS	160	POS	NEG	0.25	-2	0.125	-3	0.5	-1	2	1	2	1	4	2	IN
Bermejo	5670.1	POS	2560	POS	POS	5120	POS	POS	5120	POS	POS	1280	POS	POS	0.5	-1	0.5	-1	2	1	1	0	4	2	4	2	BR
Bermejo	3.12	NEG	10	NEG	NEG	10	NEG	NEG	10	NEG	NEG	10	NEG	NEG	1	0	1	0	1	0	1	0	1	0	1	0	NEG_ELISA
Bermejo	636.09	POS	160	POS	NEG	640	POS	POS	40	POS	NEG	160	POS	NEG	0.25	-2	4	2	1	0	0.0625	-4	4	2	0.25	-2	BR
Bermejo	1419.2	POS	320	POS	NEG	1280	POS	POS	640	POS	POS	80	POS	NEG	0.25	-2	0.5	-1	4	2	0.5	-1	16	4	8	3	BR
Bermejo	2318.9	POS	320	POS	NEG	640	POS	POS	320	POS	NEG	80	POS	NEG	0.5	-1	1	0	4	2	0.5	-1	8	3	4	2	BR
Bermejo	784.76	POS	80	POS	NEG	320	POS	NEG	160	POS	NEG	40	POS	NEG	0.25	-2	0.5	-1	2	1	0.5	-1	8	3	4	2	BR
Bermejo	1258.2	POS	320	POS	NEG	640	POS	POS	640	POS	POS	160	POS	NEG	0.5	-1	0.5	-1	2	1	1	0	4	2	4	2	BR
Bermejo	2112.4	POS	320	POS	NEG	1280	POS	POS	640	POS	POS	640	POS	POS	0.25	-2	0.5	-1	0.5	-1	0.5	-1	2	1	1	0	BR
Bermejo	220.43	POS	20	POS	NEG	20	POS	NEG	20	POS	NEG	10	NEG	NEG	1	0	1	0	2	1	1	0	2	1	2	1	BP
Bermejo	2522.3	POS	640	POS	POS	5120	POS	POS	1280	POS	POS	640	POS	POS	0.125	-3	0.5	-1	1	0	0.25	-2	8	3	2	1	BR
Bermejo	231.41	POS	20	POS	NEG	80	POS	NEG	20	POS	NEG	40	POS	NEG	0.25	-2	1	0	0.5	-1	0.25	-2	2	1	0.5	-1	BR
Bermejo	3122.2	POS	1280	POS	POS	2560	POS	POS	640	POS	POS	640	POS	POS	0.5	-1	2	1	2	1	0.25	-2	4	2	1	0	BR
Bermejo	1458.5	POS	160	POS	NEG	640	POS	POS	160	POS	NEG	80	POS	NEG	0.25	-2	1	0	2	1	0.25	-2	8	3	2	1	BR
Bermejo	4086	POS	640	POS	POS	1280	POS	POS	640	POS	POS	160	POS	NEG	0.5	-1	1	0	4	2	0.5	-1	8	3	4	2	BR
Bermejo	865.45	POS	40	POS	NEG	640	POS	POS	20	POS	NEG	40	POS	NEG	0.0625	-4	2	1	1	0	0.03125	-5	16	4	0.5	-1	BR
Bermejo	168.4	POS	20	POS	NEG	40	POS	NEG	10	NEG	NEG	10	NEG	NEG	0.5	-1	2	1	2	1	0.25	-2	4	2	1	0	BR
Bermejo	4724	POS	640	POS	POS	5120	POS	POS	1280	POS	POS	320	POS	NEG	0.125	-3	0.5	-1	2	1	0.25	-2	16	4	4	2	BR
Bermejo	2220.5	POS	640	POS	POS	640	POS	POS	640	POS	POS	160	POS	NEG	1	0	1	0	4	2	1	0	4	2	4	2	BP
Bermejo	2117.4	POS	320	POS	NEG	2560	POS	POS	320	POS	NEG	640	POS	POS	0.125	-3	1	0	0.5	-1	0.125	-3	4	2	0.5	-1	BR
Bermejo	1674.8	POS	160	POS	NEG	640	POS	POS	160	POS	NEG	320	POS	NEG	0.25	-2	1	0	0.5	-1	0.25	-2	2	1	0.5	-1	BR
Bermejo	3801.1	POS	1280	POS	POS	2560	POS	POS	2560	POS	POS	640	POS	POS	0.5	-1	0.5	-1	2	1	1	0	4	2	4	2	BR
Bermejo	1163.6	POS	320	POS	NEG	2560	POS	POS	320	POS	NEG	40	POS	NEG	0.125	-3	1	0	8	3	0.125	-3	64	6	8	3	BR
Bermejo	4755.1	POS	640	POS	POS	2560	POS	POS	1280	POS	POS	640	POS	POS	0.25	-2	0.5	-1	1	0	0.5	-1	4	2	2	1	BR
Bermejo	634.24	POS	320	POS	NEG	1280	POS	POS	80	POS	NEG	40	POS	NEG	0.25	-2	4	2	8	3	0.0625	-4	32	5	2	1	BR
Bermejo	72.164	POS	10	NEG	NEG	40	POS	NEG	10	NEG	NEG	10	NEG	NEG	0.25	-2	1	0	1	0	0.25	-2	4	2	1	0	BR
Bermejo	335.87	POS	20	POS	NEG	160	POS	NEG	20	POS	NEG	20	POS	NEG	0.125	-3	1	0	1	0	0.125	-3	8	3	1	0	BR
Bermejo	2644.9	POS	640	POS	POS	5120	POS	POS	320	POS	NEG	640	POS	POS	0.125	-3	2	1	1	0	0.0625	-4	8	3	0.5	-1	BR
Bermejo	1161.2	POS	160	POS	NEG	2560	POS	POS	160	POS	NEG	320	POS	NEG	0.0625	-4	1	0	0.5	-1	0.0625	-4	8	3	0.5	-1	BR
Bermejo	59.546	POS	10	NEG	NEG	40	POS	NEG	20	POS	NEG	10	NEG	NEG	0.25	-2	0.5	-1	1	0	0.5	-1	4	2	2	1	BR
Bermejo	193.21	POS	40	POS	NEG	320	POS	NEG	20	POS	NEG	40	POS	NEG	0.125	-3	2	1	1	0	0.0625	-4	8	3	0.5	-1	BR
Bermejo	2303.5	POS	640	POS	POS	2560	POS	POS	160	POS	NEG	40	POS	NEG	0.25	-2	4	2	16	4	0.0625	-4	64	6	4	2	BR
Bermejo	6692.5	POS	2560	POS	POS	20480	POS	POS	5120	POS	POS	320	POS	NEG	0.125	-3	0.5	-1	8	3	0.25	-2	64	6	16	4	BR
Bermejo	6879.7	POS	2560	POS	POS	10240	POS	POS	2560	POS	POS	1280	POS	POS	0.25	-2	1	0	2	1	0.25	-2	8	3	2	1	BR
Bermejo	6856.3	POS	5120	POS	POS	20480	POS	POS	5120	POS	POS	1280	POS	POS	0.25	-2	1	0	4	2	0.25	-2	16	4	4	2	BR
Bermejo	1008.5	POS	160	POS	NEG	640	POS	POS	160	POS	NEG	160	POS	NEG	0.25	-2	1	0	1	0	0.25	-2	4	2	1	0	BR
Bermejo	195.18	POS	80	POS	NEG	80	POS	NEG	40	POS	NEG	10	NEG	NEG	1	0	2	1	8	3	0.5	-1	8	3	4	2	BP
Bermejo	228.78	POS	40	POS	NEG	80	POS	NEG	160	POS	NEG	10	NEG	NEG	0.5	-1	0.25	-2	4	2	2	1	8	3	16	4	IN
Bermejo	27.234	DOU	10	NEG	NEG	20	POS	NEG	20	POS	NEG	10	NEG	NEG	0.5	-1	0.5	-1	1	0	1	0	2	1	2	1	BR
Bermejo	29.161	DOU	10	NEG	NEG	20	POS	NEG	10	NEG	NEG	10	NEG	NEG	0.5	-1	1	0	1	0	0.5	-1	2	1	1	0	BR
Bermejo	3110.3	POS	640	POS	POS	5120	POS	POS	640	POS	POS	320	POS	NEG	0.125	-3	1	0	2	1	0.125	-3	16	4	2	1	BR
Bermejo	603.52	POS	320	POS	NEG	1280	POS	POS	320	POS	NEG	80	POS	NEG	0.25	-2	1	0	4	2	0.25	-2	16	4	4	2	BR
Bermejo	4515.4	POS	1280	POS	POS	5120	POS	POS	640	POS	POS	320	POS	NEG	0.25	-2	2	1	4	2	0.125	-3	16	4	2	1	BR
Bermejo	3716.2	POS	1280	POS	POS	5120	POS	POS	1280	POS	POS	640	POS	POS	0.25	-2	1	0	2	1	0.25	-2	8	3	2	1	BR
Bermejo	1735.2	POS	1280	POS	POS	2560	POS	POS	320	POS	NEG	320	POS	NEG	0.5	-1	4	2	4	2	0.125	-3	8	3	1	0	BR
Bermejo	14.761	NEG	10	NEG	NEG	10	NEG	NEG	10	NEG	NEG	10	NEG	NEG	1	0	1	0	1	0	1	0	1	0	1	0	NEG_ELISA
Bermejo	3924.9	POS	1280	POS	POS	5120	POS	POS	640	POS	POS	320	POS	NEG	0.25	-2	2	1	4	2	0.125	-3	16	4	2	1	BR
Bermejo	1479.2	POS	160	POS	NEG	1280	POS	POS	160	POS	NEG	160	POS	NEG	0.125	-3	1	0	1	0	0.125	-3	8	3	1	0	BR
Bermejo	646.55	POS	160	POS	NEG	640	POS	POS	160	POS	NEG	160	POS	NEG	0.25	-2	1	0	1	0	0.25	-2	4	2	1	0	BR
Bermejo	1723.3	POS	640	POS	POS	2560	POS	POS	640	POS	POS	1280	POS	POS	0.25	-2	1	0	0.5	-1	0.25	-2	2	1	0.5	-1	BR
Bermejo	2424.2	POS	320	POS	NEG	320	POS	NEG	640	POS	POS	40	POS	NEG	1	0	0.5	-1	8	3	2	1	8	3	16	4	IN
Bermejo	2555	POS	320	POS	NEG	1280	POS	POS	640	POS	POS	640	POS	POS	0.25	-2	0.5	-1	0.5	-1	0.5	-1	2	1	1	0	BR
Bermejo	4252.7	POS	2560	POS	POS	1280	POS	POS	2560	POS	POS	2560	POS	POS	2	1	1	0	1	0	2	1	0.5	-1	1	0	OM
Bermejo	1324.8	POS	160	POS	NEG	2560	POS	POS	160	POS	NEG	160	POS	NEG	0.0625	-4	1	0	1	0	0.0625	-4	16	4	1	0	BR
Bermejo	2024.4	POS	640	POS	POS	2560	POS	POS	320	POS	NEG	320	POS	NEG	0.25	-2	2	1	2	1	0.125	-3	8	3	1	0	BR
Bermejo	2515.2	POS	1280	POS	POS	10240	POS	POS	2560	POS	POS	320	POS	NEG	0.125	-3	0.5	-1	4	2	0.25	-2	32	5	8	3	BR
Bermejo	3388.4	POS	2560	POS	POS	2560	POS	POS	2560	POS	POS	1280	POS	POS	1	0	1	0	2	1	1	0	2	1	2	1	BP
Bermejo	6123.6	POS	2560	POS	POS	5120	POS	POS	640	POS	POS	1280	POS	POS	0.5	-1	4	2	2	1	0.125	-3	4	2	0.5	-1	BR
Bermejo	582.4	POS	80	POS	NEG	640	POS	POS	80	POS	NEG	80	POS	NEG	0.125	-3	1	0	1	0	0.125	-3	8	3	1	0	BR
Bermejo	969.7	POS	80	POS	NEG	1280	POS	POS	80	POS	NEG	160	POS	NEG	0.0625	-4	1	0	0.5	-1	0.0625	-4	8	3	0.5	-1	BR
Bermejo	4393.3	POS	1280	POS	POS	2560	POS	POS	1280	POS	POS	640	POS	POS	0.5	-1	1	0	2	1	0.5	-1	4	2	2	1	BR
Bermejo	2202.9	POS	640	POS	POS	5120	POS	POS	640	POS	POS	160	POS	NEG	0.125	-3	1	0	4	2	0.125	-3	32	5	4	2	BR
Bermejo	2933.8	POS	160	POS	NEG	2560	POS	POS	640	POS	POS	320	POS	NEG	0.0625	-4	0.25	-2	0.5	-1	0.25	-2	8	3	2	1	BR
Bermejo	1511.6	POS	640	POS	POS	2560	POS	POS	1280	POS	POS	320	POS	NEG	0.25	-2	0.5	-1	2	1	0.5	-1	8	3	4	2	BR
Bermejo	3210.6	POS	640	POS	POS	640	POS	POS	1280	POS	POS	640	POS	POS	1	0	0.5	-1	1	0	2	1	1	0	2	1	IN
Bermejo	880.27	POS	640	POS	POS	1280	POS	POS	640	POS	POS	320	POS	NEG	0.5	-1	1	0	2	1	0.5	-1	4	2	2	1	BR
Bermejo	1969.8	POS	640	POS	POS	640	POS	POS	320	POS	NEG	160	POS	NEG	1	0	2	1	4	2	0.5	-1	4	2	2	1	BP
Bermejo	585.94	POS	40	POS	NEG	640	POS	POS	80	POS	NEG	40	POS	NEG	0.0625	-4	0.5	-1	1	0	0.125	-3	16	4	2	1	BR
Bermejo	4486	POS	2560	POS	POS	5120	POS	POS	640	POS	POS	1280	POS	POS	0.5	-1	4	2	2	1	0.125	-3	4	2	0.5	-1	BR
Bermejo	1161.2	POS	80	POS	NEG	160	POS	NEG	320	POS	NEG	80	POS	NEG	0.5	-1	0.25	-2	1	0	2	1	2	1	4	2	IN
Bermejo	3061.9	POS	1280	POS	POS	1280	POS	POS	1280	POS	POS	1280	POS	POS	1	0	1	0	1	0	1	0	1	0	1	0	OM
Bermejo	595.84	POS	40	POS	NEG	40	POS	NEG	320	POS	NEG	10	NEG	NEG	1	0	0.125	-3	4	2	8	3	4	2	32	5	IN
Bermejo	700.61	POS	160	POS	NEG	1280	POS	POS	160	POS	NEG	80	POS	NEG	0.125	-3	1	0	2	1	0.125	-3	16	4	2	1	BR
Bermejo	1519.1	POS	1280	POS	POS	2560	POS	POS	640	POS	POS	640	POS	POS	0.5	-1	2	1	2	1	0.25	-2	4	2	1	0	BR
Bermejo	760.14	POS	160	POS	NEG	160	POS	NEG	320	POS	NEG	80	POS	NEG	1	0	0.5	-1	2	1	2	1	2	1	4	2	IN
Bermejo	1780.4	POS	640	POS	POS	1280	POS	POS	320	POS	NEG	160	POS	NEG	0.5	-1	2	1	4	2	0.25	-2	8	3	2	1	BR
Bermejo	773.24	POS	640	POS	POS	640	POS	POS	320	POS	NEG	80	POS	NEG	1	0	2	1	8	3	0.5	-1	8	3	4	2	BP
Bermejo	6497.8	POS	640	POS	POS	10240	POS	POS	640	POS	POS	640	POS	POS	0.0625	-4	1	0	1	0	0.0625	-4	16	4	1	0	BR
Bermejo	517.31	POS	80	POS	NEG	640	POS	POS	40	POS	NEG	20	POS	NEG	0.125	-3	2	1	4	2	0.0625	-4	32	5	2	1	BR
Bermejo	3472.1	POS	2560	POS	POS	10240	POS	POS	2560	POS	POS	1280	POS	POS	0.25	-2	1	0	2	1	0.25	-2	8	3	2	1	BR
Bermejo	3316.7	POS	1280	POS	POS	10240	POS	POS	1280	POS	POS	640	POS	POS	0.125	-3	1	0	2	1	0.125	-3	16	4	2	1	BR
Bermejo	705.45	POS	160	POS	NEG	640	POS	POS	160	POS	NEG	40	POS	NEG	0.25	-2	1	0	4	2	0.25	-2	16	4	4	2	BR
Bermejo	1835.3	POS	640	POS	POS	1280	POS	POS	320	POS	NEG	160	POS	NEG	0.5	-1	2	1	4	2	0.25	-2	8	3	2	1	BR
Bermejo	10905	POS	2560	POS	POS	10240	POS	POS	2560	POS	POS	640	POS	POS	0.25	-2	1	0	4	2	0.25	-2	16	4	4	2	BR
Bermejo	5081.1	POS	2560	POS	POS	10240	POS	POS	2560	POS	POS	2560	POS	POS	0.25	-2	1	0	1	0	0.25	-2	4	2	1	0	BR
Bermejo	720.82	POS	160	POS	NEG	640	POS	POS	320	POS	NEG	640	POS	POS	0.25	-2	0.5	-1	0.25	-2	0.5	-1	1	0	0.5	-1	OM
Bermejo	82.661	POS	10	NEG	NEG	20	POS	NEG	10	NEG	NEG	40	POS	NEG	0.5	-1	1	0	0.25	-2	0.5	-1	0.5	-1	0.25	-2	OM
Bermejo	2273.6	POS	1280	POS	POS	2560	POS	POS	640	POS	POS	640	POS	POS	0.5	-1	2	1	2	1	0.25	-2	4	2	1	0	BR
Bermejo	20898	POS	5120	POS	POS	40960	POS	POS	5120	POS	POS	20480	POS	POS	0.125	-3	1	0	0.25	-2	0.125	-3	2	1	0.25	-2	BR
Bermejo	31.011	DOU	10	NEG	NEG	20	POS	NEG	10	NEG	NEG	20	POS	NEG	0.5	-1	1	0	0.5	-1	0.5	-1	1	0	0.5	-1	OM
Bermejo	2228.8	POS	640	POS	POS	640	POS	POS	640	POS	POS	40	POS	NEG	1	0	1	0	16	4	1	0	16	4	16	4	BP
Bermejo	2054.5	POS	640	POS	POS	5120	POS	POS	320	POS	NEG	640	POS	POS	0.125	-3	2	1	1	0	0.0625	-4	8	3	0.5	-1	BR
Bermejo	1982.3	POS	1280	POS	POS	1280	POS	POS	640	POS	POS	160	POS	NEG	1	0	2	1	8	3	0.5	-1	8	3	4	2	BP
Bermejo	6418.8	POS	2560	POS	POS	10240	POS	POS	640	POS	POS	640	POS	POS	0.25	-2	4	2	4	2	0.0625	-4	16	4	1	0	BR
Bermejo	252.19	POS	80	POS	NEG	320	POS	NEG	40	POS	NEG	80	POS	NEG	0.25	-2	2	1	1	0	0.125	-3	4	2	0.5	-1	BR
Bermejo	1080.8	POS	320	POS	NEG	320	POS	NEG	160	POS	NEG	80	POS	NEG	1	0	2	1	4	2	0.5	-1	4	2	2	1	BP
Bermejo	1304.9	POS	320	POS	NEG	320	POS	NEG	320	POS	NEG	20	POS	NEG	1	0	1	0	16	4	1	0	16	4	16	4	BP
Bermejo	679.32	POS	20	POS	NEG	640	POS	POS	20	POS	NEG	40	POS	NEG	0.03125	-5	1	0	0.5	-1	0.03125	-5	16	4	0.5	-1	BR
Bermejo	18.04	NEG	10	NEG	NEG	10	NEG	NEG	10	NEG	NEG	10	NEG	NEG	1	0	1	0	1	0	1	0	1	0	1	0	NEG_ELISA
Bermejo	712.08	POS	80	POS	NEG	320	POS	NEG	80	POS	NEG	80	POS	NEG	0.25	-2	1	0	1	0	0.25	-2	4	2	1	0	BR
Bermejo	1203.5	POS	640	POS	POS	320	POS	NEG	320	POS	NEG	320	POS	NEG	2	1	2	1	2	1	1	0	1	0	1	0	BP
Bermejo	6960.8	POS	1280	POS	POS	20480	POS	POS	320	POS	NEG	1280	POS	POS	0.0625	-4	4	2	1	0	0.015625	-6	16	4	0.25	-2	BR
Bermejo	2057	POS	1280	POS	POS	2560	POS	POS	2560	POS	POS	640	POS	POS	0.5	-1	0.5	-1	2	1	1	0	4	2	4	2	BR
Bermejo	437.18	POS	40	POS	NEG	320	POS	NEG	20	POS	NEG	10	NEG	NEG	0.125	-3	2	1	4	2	0.0625	-4	32	5	2	1	BR
Bermejo	1689.8	POS	320	POS	NEG	1280	POS	POS	320	POS	NEG	160	POS	NEG	0.25	-2	1	0	2	1	0.25	-2	8	3	2	1	BR
Bermejo	1596.2	POS	320	POS	NEG	1280	POS	POS	320	POS	NEG	160	POS	NEG	0.25	-2	1	0	2	1	0.25	-2	8	3	2	1	BR
Bermejo	2135	POS	640	POS	POS	5120	POS	POS	640	POS	POS	1280	POS	POS	0.125	-3	1	0	0.5	-1	0.125	-3	4	2	0.5	-1	BR
Bermejo	766.98	POS	640	POS	POS	640	POS	POS	320	POS	NEG	80	POS	NEG	1	0	2	1	8	3	0.5	-1	8	3	4	2	BP
Bermejo	21.777	NEG	10	NEG	NEG	10	NEG	NEG	10	NEG	NEG	10	NEG	NEG	1	0	1	0	1	0	1	0	1	0	1	0	NEG_ELISA
Bermejo	183.85	POS	10	NEG	NEG	20	POS	NEG	80	POS	NEG	160	POS	NEG	0.5	-1	0.125	-3	0.0625	-4	4	2	0.125	-3	0.5	-1	OM
Bermejo	226.8	POS	80	POS	NEG	320	POS	NEG	80	POS	NEG	40	POS	NEG	0.25	-2	1	0	2	1	0.25	-2	8	3	2	1	BR
Bermejo	12.104	NEG	10	NEG	NEG	10	NEG	NEG	10	NEG	NEG	10	NEG	NEG	1	0	1	0	1	0	1	0	1	0	1	0	NEG_ELISA
Bermejo	807.43	POS	320	POS	NEG	640	POS	POS	160	POS	NEG	160	POS	NEG	0.5	-1	2	1	2	1	0.25	-2	4	2	1	0	BR
Bermejo	174.97	POS	40	POS	NEG	320	POS	NEG	40	POS	NEG	40	POS	NEG	0.125	-3	1	0	1	0	0.125	-3	8	3	1	0	BR
Bermejo	321.77	POS	20	POS	NEG	20	POS	NEG	10	NEG	NEG	80	POS	NEG	1	0	2	1	0.25	-2	0.5	-1	0.25	-2	0.125	-3	OM
Bermejo	5676.6	POS	2560	POS	POS	10240	POS	POS	1280	POS	POS	320	POS	NEG	0.25	-2	2	1	8	3	0.125	-3	32	5	4	2	BR
Bermejo	5742	POS	2560	POS	POS	2560	POS	POS	5120	POS	POS	640	POS	POS	1	0	0.5	-1	4	2	2	1	4	2	8	3	IN
Bermejo	5024.3	POS	1280	POS	POS	10240	POS	POS	1280	POS	POS	160	POS	NEG	0.125	-3	1	0	8	3	0.125	-3	64	6	8	3	BR
Bermejo	3008	POS	1280	POS	POS	20480	POS	POS	5120	POS	POS	640	POS	POS	0.0625	-4	0.25	-2	2	1	0.25	-2	32	5	8	3	BR
Bermejo	1102.6	POS	640	POS	POS	10240	POS	POS	320	POS	NEG	80	POS	NEG	0.0625	-4	2	1	8	3	0.03125	-5	128	7	4	2	BR
Bermejo	121.59	POS	20	POS	NEG	40	POS	NEG	20	POS	NEG	80	POS	NEG	0.5	-1	1	0	0.25	-2	0.5	-1	0.5	-1	0.25	-2	OM
Bermejo	861.75	POS	160	POS	NEG	640	POS	POS	160	POS	NEG	20	POS	NEG	0.25	-2	1	0	8	3	0.25	-2	32	5	8	3	BR
Bermejo	1131.2	POS	160	POS	NEG	640	POS	POS	320	POS	NEG	80	POS	NEG	0.25	-2	0.5	-1	2	1	0.5	-1	8	3	4	2	BR
Bermejo	1112.4	POS	640	POS	POS	5120	POS	POS	320	POS	NEG	80	POS	NEG	0.125	-3	2	1	8	3	0.0625	-4	64	6	4	2	BR
Bermejo	3375.2	POS	2560	POS	POS	2560	POS	POS	2560	POS	POS	320	POS	NEG	1	0	1	0	8	3	1	0	8	3	8	3	BP
Bermejo	1580.8	POS	1280	POS	POS	1280	POS	POS	640	POS	POS	640	POS	POS	1	0	2	1	2	1	0.5	-1	2	1	1	0	BP
Bermejo	1742.9	POS	640	POS	POS	10240	POS	POS	160	POS	NEG	320	POS	NEG	0.0625	-4	4	2	2	1	0.015625	-6	32	5	0.5	-1	BR
Bermejo	3173.1	POS	2560	POS	POS	40960	POS	POS	1280	POS	POS	1280	POS	POS	0.0625	-4	2	1	2	1	0.03125	-5	32	5	1	0	BR
Bermejo	977.55	POS	80	POS	NEG	80	POS	NEG	160	POS	NEG	40	POS	NEG	1	0	0.5	-1	2	1	2	1	2	1	4	2	IN
Bermejo	820.93	POS	40	POS	NEG	320	POS	NEG	80	POS	NEG	320	POS	NEG	0.125	-3	0.5	-1	0.125	-3	0.25	-2	1	0	0.25	-2	OM
Bermejo	2258.8	POS	320	POS	NEG	320	POS	NEG	160	POS	NEG	160	POS	NEG	1	0	2	1	2	1	0.5	-1	2	1	1	0	BP
Bermejo	2433.6	POS	640	POS	POS	2560	POS	POS	2560	POS	POS	1280	POS	POS	0.25	-2	0.25	-2	0.5	-1	1	0	2	1	2	1	BR
Bermejo	2092	POS	640	POS	POS	5120	POS	POS	2560	POS	POS	320	POS	NEG	0.125	-3	0.25	-2	2	1	0.5	-1	16	4	8	3	BR
Bermejo	803.93	POS	80	POS	NEG	640	POS	POS	80	POS	NEG	10	NEG	NEG	0.125	-3	1	0	8	3	0.125	-3	64	6	8	3	BR
Bermejo	1161	POS	1280	POS	POS	20480	POS	POS	2560	POS	POS	640	POS	POS	0.0625	-4	0.5	-1	2	1	0.125	-3	32	5	4	2	BR
Bermejo	195.7	POS	40	POS	NEG	1280	POS	POS	80	POS	NEG	80	POS	NEG	0.03125	-5	0.5	-1	0.5	-1	0.0625	-4	16	4	1	0	BR
Bermejo	304.8	POS	640	POS	POS	10240	POS	POS	160	POS	NEG	80	POS	NEG	0.0625	-4	4	2	8	3	0.015625	-6	128	7	2	1	BR
Bermejo	5120	POS	640	POS	POS	2560	POS	POS	320	POS	NEG	320	POS	NEG	0.25	-2	2	1	2	1	0.125	-3	8	3	1	0	BR
Bermejo	7195.6	POS	1280	POS	POS	1280	POS	POS	5120	POS	POS	640	POS	POS	1	0	0.25	-2	2	1	4	2	2	1	8	3	IN
Bermejo	2396	POS	640	POS	POS	5120	POS	POS	1280	POS	POS	1280	POS	POS	0.125	-3	0.5	-1	0.5	-1	0.25	-2	4	2	1	0	BR
Bermejo	2383.5	POS	640	POS	POS	2560	POS	POS	640	POS	POS	1280	POS	POS	0.25	-2	1	0	0.5	-1	0.25	-2	2	1	0.5	-1	BR
Bermejo	850.79	POS	320	POS	NEG	2560	POS	POS	320	POS	NEG	80	POS	NEG	0.125	-3	1	0	4	2	0.125	-3	32	5	4	2	BR
Bermejo	198.24	POS	320	POS	NEG	640	POS	POS	320	POS	NEG	20	POS	NEG	0.5	-1	1	0	16	4	0.5	-1	32	5	16	4	BR
Bermejo	1013.3	POS	40	POS	NEG	640	POS	POS	160	POS	NEG	40	POS	NEG	0.0625	-4	0.25	-2	1	0	0.25	-2	16	4	4	2	BR
Bermejo	7530.6	POS	2560	POS	POS	2560	POS	POS	1280	POS	POS	1280	POS	POS	1	0	2	1	2	1	0.5	-1	2	1	1	0	BP
Bermejo	839.3	POS	20	POS	NEG	40	POS	NEG	10	NEG	NEG	80	POS	NEG	0.5	-1	2	1	0.25	-2	0.25	-2	0.5	-1	0.125	-3	OM
Bermejo	754.29	POS	80	POS	NEG	320	POS	NEG	160	POS	NEG	40	POS	NEG	0.25	-2	0.5	-1	2	1	0.5	-1	8	3	4	2	BR
Bermejo	7191.1	POS	2560	POS	POS	10240	POS	POS	2560	POS	POS	1280	POS	POS	0.25	-2	1	0	2	1	0.25	-2	8	3	2	1	BR
Bermejo	3233.7	POS	1280	POS	POS	10240	POS	POS	1280	POS	POS	1280	POS	POS	0.125	-3	1	0	1	0	0.125	-3	8	3	1	0	BR
Bermejo	318.23	POS	160	POS	NEG	160	POS	NEG	160	POS	NEG	160	POS	NEG	1	0	1	0	1	0	1	0	1	0	1	0	OM
Bermejo	1846.7	POS	640	POS	POS	1280	POS	POS	640	POS	POS	160	POS	NEG	0.5	-1	1	0	4	2	0.5	-1	8	3	4	2	BR
Bermejo	1017.3	POS	160	POS	NEG	640	POS	POS	320	POS	NEG	160	POS	NEG	0.25	-2	0.5	-1	1	0	0.5	-1	4	2	2	1	BR
Bermejo	1339.7	POS	1280	POS	POS	1280	POS	POS	640	POS	POS	80	POS	NEG	1	0	2	1	16	4	0.5	-1	16	4	8	3	BP
Bermejo	2296.9	POS	640	POS	POS	640	POS	POS	640	POS	POS	160	POS	NEG	1	0	1	0	4	2	1	0	4	2	4	2	BP
Bermejo	2102.1	POS	1280	POS	POS	640	POS	POS	640	POS	POS	640	POS	POS	2	1	2	1	2	1	1	0	1	0	1	0	BP
Bermejo	1935.2	POS	640	POS	POS	5120	POS	POS	640	POS	POS	2560	POS	POS	0.125	-3	1	0	0.25	-2	0.125	-3	2	1	0.25	-2	BR
Bermejo	193.16	POS	160	POS	NEG	640	POS	POS	20	POS	NEG	40	POS	NEG	0.25	-2	8	3	4	2	0.03125	-5	16	4	0.5	-1	BR
Bermejo	1297.4	POS	80	POS	NEG	320	POS	NEG	160	POS	NEG	10	NEG	NEG	0.25	-2	0.5	-1	8	3	0.5	-1	32	5	16	4	BR
Bermejo	662.46	POS	320	POS	NEG	1280	POS	POS	160	POS	NEG	80	POS	NEG	0.25	-2	2	1	4	2	0.125	-3	16	4	2	1	BR
Bermejo	2114.8	POS	1280	POS	POS	5120	POS	POS	640	POS	POS	640	POS	POS	0.25	-2	2	1	2	1	0.125	-3	8	3	1	0	BR
Bermejo	1335.7	POS	160	POS	NEG	2560	POS	POS	80	POS	NEG	80	POS	NEG	0.0625	-4	2	1	2	1	0.03125	-5	32	5	1	0	BR
Bermejo	1042	POS	320	POS	NEG	640	POS	POS	640	POS	POS	320	POS	NEG	0.5	-1	0.5	-1	1	0	1	0	2	1	2	1	BR
Bermejo	2522.6	POS	320	POS	NEG	2560	POS	POS	640	POS	POS	320	POS	NEG	0.125	-3	0.5	-1	1	0	0.25	-2	8	3	2	1	BR
Bermejo	37.04	POS	20	POS	NEG	80	POS	NEG	20	POS	NEG	10	NEG	NEG	0.25	-2	1	0	2	1	0.25	-2	8	3	2	1	BR
Bermejo	1973.4	POS	640	POS	POS	2560	POS	POS	640	POS	POS	160	POS	NEG	0.25	-2	1	0	4	2	0.25	-2	16	4	4	2	BR
Bermejo	5235.4	POS	1280	POS	POS	5120	POS	POS	640	POS	POS	40	POS	NEG	0.25	-2	2	1	32	5	0.125	-3	128	7	16	4	BR
Bermejo	686.06	POS	320	POS	NEG	1280	POS	POS	320	POS	NEG	320	POS	NEG	0.25	-2	1	0	1	0	0.25	-2	4	2	1	0	BR
Bermejo	693.33	POS	640	POS	POS	640	POS	POS	160	POS	NEG	40	POS	NEG	1	0	4	2	16	4	0.25	-2	16	4	4	2	BP
Bermejo	843.17	POS	320	POS	NEG	160	POS	NEG	40	POS	NEG	40	POS	NEG	2	1	8	3	8	3	0.25	-2	4	2	1	0	BP
Bermejo	4584.4	POS	2560	POS	POS	10240	POS	POS	1280	POS	POS	1280	POS	POS	0.25	-2	2	1	2	1	0.125	-3	8	3	1	0	BR
Bermejo	1420.1	POS	320	POS	NEG	640	POS	POS	320	POS	NEG	20	POS	NEG	0.5	-1	1	0	16	4	0.5	-1	32	5	16	4	BR
Bermejo	1277.5	POS	1280	POS	POS	1280	POS	POS	640	POS	POS	80	POS	NEG	1	0	2	1	16	4	0.5	-1	16	4	8	3	BP
Bermejo	652.7	POS	160	POS	NEG	640	POS	POS	320	POS	NEG	40	POS	NEG	0.25	-2	0.5	-1	4	2	0.5	-1	16	4	8	3	BR
Bermejo	322.85	POS	320	POS	NEG	80	POS	NEG	160	POS	NEG	10	NEG	NEG	4	2	2	1	32	5	2	1	8	3	16	4	BP
Bermejo	18229	POS	10240	POS	POS	20480	POS	POS	10240	POS	POS	2560	POS	POS	0.5	-1	1	0	4	2	0.5	-1	8	3	4	2	BR
Bermejo	1747.3	POS	1280	POS	POS	5120	POS	POS	640	POS	POS	640	POS	POS	0.25	-2	2	1	2	1	0.125	-3	8	3	1	0	BR
Bermejo	1997.1	POS	1280	POS	POS	2560	POS	POS	160	POS	NEG	320	POS	NEG	0.5	-1	8	3	4	2	0.0625	-4	8	3	0.5	-1	BR
Bermejo	506.14	POS	40	POS	NEG	160	POS	NEG	640	POS	POS	10	NEG	NEG	0.25	-2	0.0625	-4	4	2	4	2	16	4	64	6	IN
Bermejo	14.065	NEG	10	NEG	NEG	10	NEG	NEG	10	NEG	NEG	10	NEG	NEG	1	0	1	0	1	0	1	0	1	0	1	0	NEG_ELISA
Bermejo	1407.8	POS	320	POS	NEG	320	POS	NEG	640	POS	POS	40	POS	NEG	1	0	0.5	-1	8	3	2	1	8	3	16	4	IN
Bermejo	3988.9	POS	640	POS	POS	2560	POS	POS	640	POS	POS	160	POS	NEG	0.25	-2	1	0	4	2	0.25	-2	16	4	4	2	BR
Bermejo	619.72	POS	160	POS	NEG	2560	POS	POS	320	POS	NEG	10	NEG	NEG	0.0625	-4	0.5	-1	16	4	0.125	-3	256	8	32	5	BR
Bermejo	5136.4	POS	5120	POS	POS	10240	POS	POS	2560	POS	POS	1280	POS	POS	0.5	-1	2	1	4	2	0.25	-2	8	3	2	1	BR
Bermejo	1139.2	POS	320	POS	NEG	320	POS	NEG	160	POS	NEG	40	POS	NEG	1	0	2	1	8	3	0.5	-1	8	3	4	2	BP
Bermejo	1527.9	POS	1280	POS	POS	640	POS	POS	320	POS	NEG	80	POS	NEG	2	1	4	2	16	4	0.5	-1	8	3	4	2	BP
Bermejo	713.2	POS	320	POS	NEG	640	POS	POS	320	POS	NEG	160	POS	NEG	0.5	-1	1	0	2	1	0.5	-1	4	2	2	1	BR
Bermejo	4668.6	POS	2560	POS	POS	5120	POS	POS	1280	POS	POS	160	POS	NEG	0.5	-1	2	1	16	4	0.25	-2	32	5	8	3	BR
Bermejo	2683.5	POS	1280	POS	POS	10240	POS	POS	320	POS	NEG	320	POS	NEG	0.125	-3	4	2	4	2	0.03125	-5	32	5	1	0	BR
Bermejo	3793.9	POS	640	POS	POS	2560	POS	POS	1280	POS	POS	80	POS	NEG	0.25	-2	0.5	-1	8	3	0.5	-1	32	5	16	4	BR
Bermejo	48.457	POS	40	POS	NEG	80	POS	NEG	20	POS	NEG	320	POS	NEG	0.5	-1	2	1	0.125	-3	0.25	-2	0.25	-2	0.0625	-4	OM
Bermejo	2505.8	POS	1280	POS	POS	10240	POS	POS	640	POS	POS	640	POS	POS	0.125	-3	2	1	2	1	0.0625	-4	16	4	1	0	BR
Bermejo	80.606	POS	10	NEG	NEG	10	NEG	NEG	10	NEG	NEG	10	NEG	NEG	1	0	1	0	1	0	1	0	1	0	1	0	NEG
Bermejo	1836.6	POS	640	POS	POS	1280	POS	POS	640	POS	POS	320	POS	NEG	0.5	-1	1	0	2	1	0.5	-1	4	2	2	1	BR
Bermejo	38.217	POS	20	POS	NEG	20	POS	NEG	10	NEG	NEG	40	POS	NEG	1	0	2	1	0.5	-1	0.5	-1	0.5	-1	0.25	-2	OM
Bermejo	1111.6	POS	160	POS	NEG	2560	POS	POS	320	POS	NEG	80	POS	NEG	0.0625	-4	0.5	-1	2	1	0.125	-3	32	5	4	2	BR
Bermejo	4516.5	POS	1280	POS	POS	5120	POS	POS	1280	POS	POS	320	POS	NEG	0.25	-2	1	0	4	2	0.25	-2	16	4	4	2	BR
Bermejo	1155.6	POS	320	POS	NEG	2560	POS	POS	160	POS	NEG	320	POS	NEG	0.125	-3	2	1	1	0	0.0625	-4	8	3	0.5	-1	BR
Bermejo	2891.2	POS	1280	POS	POS	1280	POS	POS	320	POS	NEG	160	POS	NEG	1	0	4	2	8	3	0.25	-2	8	3	2	1	BP
Bermejo	331.12	POS	20	POS	NEG	20	POS	NEG	20	POS	NEG	20	POS	NEG	1	0	1	0	1	0	1	0	1	0	1	0	OM
Bermejo	10.184	NEG	10	NEG	NEG	10	NEG	NEG	10	NEG	NEG	10	NEG	NEG	1	0	1	0	1	0	1	0	1	0	1	0	NEG_ELISA
Bermejo	158.02	POS	160	POS	NEG	160	POS	NEG	40	POS	NEG	320	POS	NEG	1	0	4	2	0.5	-1	0.25	-2	0.5	-1	0.125	-3	OM
Bermejo	950.3	POS	640	POS	POS	320	POS	NEG	640	POS	POS	80	POS	NEG	2	1	1	0	8	3	2	1	4	2	8	3	BP
Bermejo	45.714	POS	20	POS	NEG	20	POS	NEG	10	NEG	NEG	40	POS	NEG	1	0	2	1	0.5	-1	0.5	-1	0.5	-1	0.25	-2	OM
Bermejo	188.07	POS	20	POS	NEG	10	NEG	NEG	10	NEG	NEG	10	NEG	NEG	2	1	2	1	2	1	1	0	1	0	1	0	BP
Bermejo	1003.8	POS	640	POS	POS	1280	POS	POS	640	POS	POS	320	POS	NEG	0.5	-1	1	0	2	1	0.5	-1	4	2	2	1	BR
Bermejo	627.39	POS	320	POS	NEG	640	POS	POS	320	POS	NEG	160	POS	NEG	0.5	-1	1	0	2	1	0.5	-1	4	2	2	1	BR
Bermejo	659.39	POS	320	POS	NEG	2560	POS	POS	320	POS	NEG	640	POS	POS	0.125	-3	1	0	0.5	-1	0.125	-3	4	2	0.5	-1	BR
Bermejo	2266.6	POS	640	POS	POS	1280	POS	POS	160	POS	NEG	320	POS	NEG	0.5	-1	4	2	2	1	0.125	-3	4	2	0.5	-1	BR
Bermejo	1441.9	POS	320	POS	NEG	640	POS	POS	320	POS	NEG	160	POS	NEG	0.5	-1	1	0	2	1	0.5	-1	4	2	2	1	BR
Bermejo	8786.8	POS	2560	POS	POS	10240	POS	POS	5120	POS	POS	1280	POS	POS	0.25	-2	0.5	-1	2	1	0.5	-1	8	3	4	2	BR
Bermejo	128.84	POS	80	POS	NEG	20	POS	NEG	80	POS	NEG	10	NEG	NEG	4	2	1	0	8	3	4	2	2	1	8	3	BP
Bermejo	7014.1	POS	2560	POS	POS	5120	POS	POS	5120	POS	POS	5120	POS	POS	0.5	-1	0.5	-1	0.5	-1	1	0	1	0	1	0	OM
Bermejo	2241.3	POS	640	POS	POS	2560	POS	POS	640	POS	POS	320	POS	NEG	0.25	-2	1	0	2	1	0.25	-2	8	3	2	1	BR
Bermejo	400.64	POS	320	POS	NEG	640	POS	POS	640	POS	POS	80	POS	NEG	0.5	-1	0.5	-1	4	2	1	0	8	3	8	3	BR
Bermejo	2882.7	POS	640	POS	POS	5120	POS	POS	160	POS	NEG	640	POS	POS	0.125	-3	4	2	1	0	0.03125	-5	8	3	0.25	-2	BR
Bermejo	2989	POS	320	POS	NEG	2560	POS	POS	320	POS	NEG	80	POS	NEG	0.125	-3	1	0	4	2	0.125	-3	32	5	4	2	BR
Bermejo	14.533	NEG	10	NEG	NEG	10	NEG	NEG	10	NEG	NEG	10	NEG	NEG	1	0	1	0	1	0	1	0	1	0	1	0	NEG_ELISA
Bermejo	1260.4	POS	160	POS	NEG	640	POS	POS	160	POS	NEG	160	POS	NEG	0.25	-2	1	0	1	0	0.25	-2	4	2	1	0	BR
Bermejo	952.73	POS	640	POS	POS	2560	POS	POS	160	POS	NEG	160	POS	NEG	0.25	-2	4	2	4	2	0.0625	-4	16	4	1	0	BR
Bermejo	315.86	POS	320	POS	NEG	1280	POS	POS	320	POS	NEG	40	POS	NEG	0.25	-2	1	0	8	3	0.25	-2	32	5	8	3	BR
Bermejo	349.26	POS	160	POS	NEG	80	POS	NEG	80	POS	NEG	80	POS	NEG	2	1	2	1	2	1	1	0	1	0	1	0	BP
Bermejo	284.33	POS	20	POS	NEG	40	POS	NEG	40	POS	NEG	80	POS	NEG	0.5	-1	0.5	-1	0.25	-2	1	0	0.5	-1	0.5	-1	OM
Bermejo	263.75	POS	40	POS	NEG	320	POS	NEG	40	POS	NEG	20	POS	NEG	0.125	-3	1	0	2	1	0.125	-3	16	4	2	1	BR
Bermejo	2036.8	POS	640	POS	POS	1280	POS	POS	160	POS	NEG	160	POS	NEG	0.5	-1	4	2	4	2	0.125	-3	8	3	1	0	BR
Bermejo	5136.4	POS	640	POS	POS	640	POS	POS	2560	POS	POS	20	POS	NEG	1	0	0.25	-2	32	5	4	2	32	5	128	7	IN
Bermejo	727.27	POS	320	POS	NEG	2560	POS	POS	640	POS	POS	320	POS	NEG	0.125	-3	0.5	-1	1	0	0.25	-2	8	3	2	1	BR
Bermejo	3840	POS	1280	POS	POS	640	POS	POS	640	POS	POS	640	POS	POS	2	1	2	1	2	1	1	0	1	0	1	0	BP
Bermejo	128	POS	40	POS	NEG	320	POS	NEG	20	POS	NEG	10	NEG	NEG	0.125	-3	2	1	4	2	0.0625	-4	32	5	2	1	BR
Bermejo	4232.1	POS	1280	POS	POS	1280	POS	POS	320	POS	NEG	1280	POS	POS	1	0	4	2	1	0	0.25	-2	1	0	0.25	-2	OM
Bermejo	1366	POS	640	POS	POS	320	POS	NEG	640	POS	POS	160	POS	NEG	2	1	1	0	4	2	2	1	2	1	4	2	BP
Bermejo	3684	POS	2560	POS	POS	20480	POS	POS	640	POS	POS	640	POS	POS	0.125	-3	4	2	4	2	0.03125	-5	32	5	1	0	BR
Bermejo	3301.1	POS	2560	POS	POS	5120	POS	POS	1280	POS	POS	640	POS	POS	0.5	-1	2	1	4	2	0.25	-2	8	3	2	1	BR
Bermejo	2522.7	POS	640	POS	POS	1280	POS	POS	640	POS	POS	1280	POS	POS	0.5	-1	1	0	0.5	-1	0.5	-1	1	0	0.5	-1	OM
Bermejo	1081.2	POS	1280	POS	POS	640	POS	POS	320	POS	NEG	40	POS	NEG	2	1	4	2	32	5	0.5	-1	16	4	8	3	BP
Bermejo	1835.4	POS	1280	POS	POS	1280	POS	POS	1280	POS	POS	160	POS	NEG	1	0	1	0	8	3	1	0	8	3	8	3	BP
Bermejo	1138.5	POS	40	POS	NEG	320	POS	NEG	40	POS	NEG	80	POS	NEG	0.125	-3	1	0	0.5	-1	0.125	-3	4	2	0.5	-1	BR
Bermejo	166.87	POS	20	POS	NEG	40	POS	NEG	10	NEG	NEG	10	NEG	NEG	0.5	-1	2	1	2	1	0.25	-2	4	2	1	0	BR
Bermejo	7341.6	POS	2560	POS	POS	10240	POS	POS	2560	POS	POS	1280	POS	POS	0.25	-2	1	0	2	1	0.25	-2	8	3	2	1	BR
Bermejo	183.84	POS	40	POS	NEG	80	POS	NEG	40	POS	NEG	20	POS	NEG	0.5	-1	1	0	2	1	0.5	-1	4	2	2	1	BR
Bermejo	422.26	POS	160	POS	NEG	80	POS	NEG	320	POS	NEG	160	POS	NEG	2	1	0.5	-1	1	0	4	2	0.5	-1	2	1	IN
Bermejo	6493.6	POS	5120	POS	POS	2560	POS	POS	10240	POS	POS	5120	POS	POS	2	1	0.5	-1	1	0	4	2	0.5	-1	2	1	IN
Bermejo	2199	POS	640	POS	POS	320	POS	NEG	320	POS	NEG	160	POS	NEG	2	1	2	1	4	2	1	0	2	1	2	1	BP
Bermejo	4779.2	POS	640	POS	POS	640	POS	POS	640	POS	POS	80	POS	NEG	1	0	1	0	8	3	1	0	8	3	8	3	BP
Bermejo	3869	POS	640	POS	POS	1280	POS	POS	640	POS	POS	640	POS	POS	0.5	-1	1	0	1	0	0.5	-1	2	1	1	0	BR
Bermejo	175.3	POS	320	POS	NEG	320	POS	NEG	320	POS	NEG	80	POS	NEG	1	0	1	0	4	2	1	0	4	2	4	2	BP
Bermejo	168	POS	20	POS	NEG	40	POS	NEG	20	POS	NEG	10	NEG	NEG	0.5	-1	1	0	2	1	0.5	-1	4	2	2	1	BR
Bermejo	2047.2	POS	640	POS	POS	640	POS	POS	640	POS	POS	160	POS	NEG	1	0	1	0	4	2	1	0	4	2	4	2	BP
Bermejo	210.36	POS	20	POS	NEG	40	POS	NEG	20	POS	NEG	20	POS	NEG	0.5	-1	1	0	1	0	0.5	-1	2	1	1	0	BR
Bermejo	244.79	POS	20	POS	NEG	40	POS	NEG	80	POS	NEG	10	NEG	NEG	0.5	-1	0.25	-2	2	1	2	1	4	2	8	3	IN
Bermejo	2819.5	POS	1280	POS	POS	5120	POS	POS	1280	POS	POS	1280	POS	POS	0.25	-2	1	0	1	0	0.25	-2	4	2	1	0	BR
Bermejo	558.16	POS	320	POS	NEG	320	POS	NEG	160	POS	NEG	40	POS	NEG	1	0	2	1	8	3	0.5	-1	8	3	4	2	BP
Bermejo	308.38	POS	40	POS	NEG	10	NEG	NEG	40	POS	NEG	40	POS	NEG	4	2	1	0	1	0	4	2	0.25	-2	1	0	OM
Bermejo	1113.8	POS	320	POS	NEG	640	POS	POS	640	POS	POS	320	POS	NEG	0.5	-1	0.5	-1	1	0	1	0	2	1	2	1	BR
Bermejo	187.42	POS	10	NEG	NEG	10	NEG	NEG	10	NEG	NEG	20	POS	NEG	1	0	1	0	0.5	-1	1	0	0.5	-1	0.5	-1	OM
Bermejo	231.98	POS	20	POS	NEG	20	POS	NEG	640	POS	POS	20	POS	NEG	1	0	0.03125	-5	1	0	32	5	1	0	32	5	IN
Bermejo	3371.1	POS	1280	POS	POS	2560	POS	POS	1280	POS	POS	640	POS	POS	0.5	-1	1	0	2	1	0.5	-1	4	2	2	1	BR
Bermejo	1241.8	POS	80	POS	NEG	40	POS	NEG	320	POS	NEG	160	POS	NEG	2	1	0.25	-2	0.5	-1	8	3	0.25	-2	2	1	IN
Bermejo	1277.2	POS	640	POS	POS	320	POS	NEG	640	POS	POS	160	POS	NEG	2	1	1	0	4	2	2	1	2	1	4	2	BP
Bermejo	1486.3	POS	640	POS	POS	640	POS	POS	320	POS	NEG	320	POS	NEG	1	0	2	1	2	1	0.5	-1	2	1	1	0	BP
Bermejo	1181.2	POS	80	POS	NEG	80	POS	NEG	160	POS	NEG	160	POS	NEG	1	0	0.5	-1	0.5	-1	2	1	0.5	-1	1	0	OM
Bermejo	331.36	POS	160	POS	NEG	40	POS	NEG	160	POS	NEG	80	POS	NEG	4	2	1	0	2	1	4	2	0.5	-1	2	1	BP
Bermejo	1608.1	POS	160	POS	NEG	320	POS	NEG	160	POS	NEG	160	POS	NEG	0.5	-1	1	0	1	0	0.5	-1	2	1	1	0	BR
Bermejo	3009.3	POS	320	POS	NEG	640	POS	POS	160	POS	NEG	160	POS	NEG	0.5	-1	2	1	2	1	0.25	-2	4	2	1	0	BR
Bermejo	247.57	POS	80	POS	NEG	20	POS	NEG	20	POS	NEG	20	POS	NEG	4	2	4	2	4	2	1	0	1	0	1	0	BP
Bermejo	3853.1	POS	1280	POS	POS	2560	POS	POS	1280	POS	POS	2560	POS	POS	0.5	-1	1	0	0.5	-1	0.5	-1	1	0	0.5	-1	OM
Bermejo	1816.9	POS	320	POS	NEG	1280	POS	POS	640	POS	POS	640	POS	POS	0.25	-2	0.5	-1	0.5	-1	0.5	-1	2	1	1	0	BR
Bermejo	254.1	POS	80	POS	NEG	320	POS	NEG	160	POS	NEG	20	POS	NEG	0.25	-2	0.5	-1	4	2	0.5	-1	16	4	8	3	BR
Bermejo	1888.9	POS	320	POS	NEG	320	POS	NEG	1280	POS	POS	320	POS	NEG	1	0	0.25	-2	1	0	4	2	1	0	4	2	IN
Bermejo	1541	POS	320	POS	NEG	640	POS	POS	320	POS	NEG	320	POS	NEG	0.5	-1	1	0	1	0	0.5	-1	2	1	1	0	BR
Bermejo	33.646	DOU	20	POS	NEG	20	POS	NEG	20	POS	NEG	10	NEG	NEG	1	0	1	0	2	1	1	0	2	1	2	1	BP
Bermejo	325.21	POS	320	POS	NEG	160	POS	NEG	320	POS	NEG	20	POS	NEG	2	1	1	0	16	4	2	1	8	3	16	4	BP
Bermejo	1228.4	POS	320	POS	NEG	640	POS	POS	320	POS	NEG	320	POS	NEG	0.5	-1	1	0	1	0	0.5	-1	2	1	1	0	BR
Bermejo	535.1	POS	160	POS	NEG	640	POS	POS	20	POS	NEG	20	POS	NEG	0.25	-2	8	3	8	3	0.03125	-5	32	5	1	0	BR
Bermejo	1282.5	POS	320	POS	NEG	320	POS	NEG	640	POS	POS	160	POS	NEG	1	0	0.5	-1	2	1	2	1	2	1	4	2	IN
Bermejo	146.75	POS	40	POS	NEG	40	POS	NEG	20	POS	NEG	40	POS	NEG	1	0	2	1	1	0	0.5	-1	1	0	0.5	-1	OM
Bermejo	3513.8	POS	320	POS	NEG	1280	POS	POS	640	POS	POS	320	POS	NEG	0.25	-2	0.5	-1	1	0	0.5	-1	4	2	2	1	BR
Bermejo	1110.3	POS	640	POS	POS	1280	POS	POS	160	POS	NEG	160	POS	NEG	0.5	-1	4	2	4	2	0.125	-3	8	3	1	0	BR
Bermejo	223.76	POS	80	POS	NEG	160	POS	NEG	40	POS	NEG	40	POS	NEG	0.5	-1	2	1	2	1	0.25	-2	4	2	1	0	BR
Bermejo	76.916	POS	20	POS	NEG	10	NEG	NEG	40	POS	NEG	10	NEG	NEG	2	1	0.5	-1	2	1	4	2	1	0	4	2	IN
Bermejo	199.11	POS	40	POS	NEG	40	POS	NEG	20	POS	NEG	40	POS	NEG	1	0	2	1	1	0	0.5	-1	1	0	0.5	-1	OM
Bermejo	974.08	POS	320	POS	NEG	160	POS	NEG	160	POS	NEG	160	POS	NEG	2	1	2	1	2	1	1	0	1	0	1	0	BP
Bermejo	1962	POS	640	POS	POS	640	POS	POS	1280	POS	POS	320	POS	NEG	1	0	0.5	-1	2	1	2	1	2	1	4	2	IN
Bermejo	870.18	POS	160	POS	NEG	160	POS	NEG	320	POS	NEG	160	POS	NEG	1	0	0.5	-1	1	0	2	1	1	0	2	1	IN
Bermejo	6575.5	POS	2560	POS	POS	5120	POS	POS	640	POS	POS	320	POS	NEG	0.5	-1	4	2	8	3	0.125	-3	16	4	2	1	BR
Bermejo	523.66	POS	320	POS	NEG	320	POS	NEG	160	POS	NEG	320	POS	NEG	1	0	2	1	1	0	0.5	-1	1	0	0.5	-1	OM
Bermejo	1270.3	POS	640	POS	POS	640	POS	POS	640	POS	POS	160	POS	NEG	1	0	1	0	4	2	1	0	4	2	4	2	BP
Bermejo	2159.7	POS	160	POS	NEG	2560	POS	POS	320	POS	NEG	80	POS	NEG	0.0625	-4	0.5	-1	2	1	0.125	-3	32	5	4	2	BR
Bermejo	853.33	POS	640	POS	POS	1280	POS	POS	320	POS	NEG	160	POS	NEG	0.5	-1	2	1	4	2	0.25	-2	8	3	2	1	BR
Bermejo	231.24	POS	20	POS	NEG	10	NEG	NEG	10	NEG	NEG	40	POS	NEG	2	1	2	1	0.5	-1	1	0	0.25	-2	0.25	-2	OM
Bermejo	652.12	POS	640	POS	POS	640	POS	POS	320	POS	NEG	80	POS	NEG	1	0	2	1	8	3	0.5	-1	8	3	4	2	BP
Bermejo	242.38	POS	20	POS	NEG	20	POS	NEG	80	POS	NEG	10	NEG	NEG	1	0	0.25	-2	2	1	4	2	2	1	8	3	IN
Bermejo	3850.6	POS	640	POS	POS	1280	POS	POS	640	POS	POS	320	POS	NEG	0.5	-1	1	0	2	1	0.5	-1	4	2	2	1	BR
Bermejo	1030.2	POS	160	POS	NEG	40	POS	NEG	320	POS	NEG	640	POS	POS	4	2	0.5	-1	0.25	-2	8	3	0.0625	-4	0.5	-1	OM
Bermejo	13.547	NEG	10	NEG	NEG	10	NEG	NEG	10	NEG	NEG	10	NEG	NEG	1	0	1	0	1	0	1	0	1	0	1	0	NEG_ELISA
Bermejo	1756.5	POS	320	POS	NEG	2560	POS	POS	160	POS	NEG	320	POS	NEG	0.125	-3	2	1	1	0	0.0625	-4	8	3	0.5	-1	BR
Bermejo	3850.6	POS	2560	POS	POS	2560	POS	POS	2560	POS	POS	1280	POS	POS	1	0	1	0	2	1	1	0	2	1	2	1	BP
Bermejo	309.18	POS	160	POS	NEG	160	POS	NEG	160	POS	NEG	80	POS	NEG	1	0	1	0	2	1	1	0	2	1	2	1	BP
Bermejo	183.35	POS	80	POS	NEG	80	POS	NEG	40	POS	NEG	10	NEG	NEG	1	0	2	1	8	3	0.5	-1	8	3	4	2	BP
Bermejo	471.68	POS	320	POS	NEG	160	POS	NEG	80	POS	NEG	320	POS	NEG	2	1	4	2	1	0	0.5	-1	0.5	-1	0.25	-2	OM
Bermejo	2974.8	POS	1280	POS	POS	1280	POS	POS	320	POS	NEG	80	POS	NEG	1	0	4	2	16	4	0.25	-2	16	4	4	2	BP
Bermejo	8716.6	POS	1280	POS	POS	2560	POS	POS	5120	POS	POS	2560	POS	POS	0.5	-1	0.25	-2	0.5	-1	2	1	1	0	2	1	IN
Bermejo	3198.2	POS	2560	POS	POS	5120	POS	POS	2560	POS	POS	1280	POS	POS	0.5	-1	1	0	2	1	0.5	-1	4	2	2	1	BR
Bermejo	1083.5	POS	320	POS	NEG	80	POS	NEG	320	POS	NEG	80	POS	NEG	4	2	1	0	4	2	4	2	1	0	4	2	BP
Bermejo	733.84	POS	160	POS	NEG	160	POS	NEG	320	POS	NEG	80	POS	NEG	1	0	0.5	-1	2	1	2	1	2	1	4	2	IN
Bermejo	12262	POS	10240	POS	POS	10240	POS	POS	10240	POS	POS	5120	POS	POS	1	0	1	0	2	1	1	0	2	1	2	1	BP
Bermejo	1830.4	POS	320	POS	NEG	160	POS	NEG	640	POS	POS	160	POS	NEG	2	1	0.5	-1	2	1	4	2	1	0	4	2	IN
Bermejo	1069.1	POS	640	POS	POS	80	POS	NEG	640	POS	POS	20	POS	NEG	8	3	1	0	32	5	8	3	4	2	32	5	BP
Bermejo	2594.2	POS	2560	POS	POS	2560	POS	POS	1280	POS	POS	1280	POS	POS	1	0	2	1	2	1	0.5	-1	2	1	1	0	BP
Bermejo	1694.9	POS	160	POS	NEG	80	POS	NEG	80	POS	NEG	40	POS	NEG	2	1	2	1	4	2	1	0	2	1	2	1	BP
Bermejo	2932.3	POS	320	POS	NEG	1280	POS	POS	320	POS	NEG	160	POS	NEG	0.25	-2	1	0	2	1	0.25	-2	8	3	2	1	BR
Bermejo	3821.6	POS	2560	POS	POS	640	POS	POS	1280	POS	POS	640	POS	POS	4	2	2	1	4	2	2	1	1	0	2	1	BP
Bermejo	2840.1	POS	640	POS	POS	1280	POS	POS	320	POS	NEG	640	POS	POS	0.5	-1	2	1	1	0	0.25	-2	2	1	0.5	-1	BR
Bermejo	2182.8	POS	320	POS	NEG	320	POS	NEG	320	POS	NEG	80	POS	NEG	1	0	1	0	4	2	1	0	4	2	4	2	BP
Bermejo	1546.8	POS	640	POS	POS	320	POS	NEG	80	POS	NEG	80	POS	NEG	2	1	8	3	8	3	0.25	-2	4	2	1	0	BP
Bermejo	1805.3	POS	160	POS	NEG	320	POS	NEG	80	POS	NEG	80	POS	NEG	0.5	-1	2	1	2	1	0.25	-2	4	2	1	0	BR
Bermejo	2754.5	POS	320	POS	NEG	640	POS	POS	1280	POS	POS	640	POS	POS	0.5	-1	0.25	-2	0.5	-1	2	1	1	0	2	1	IN
Bermejo	3446.4	POS	320	POS	NEG	80	POS	NEG	320	POS	NEG	80	POS	NEG	4	2	1	0	4	2	4	2	1	0	4	2	BP
Bermejo	3340.1	POS	1280	POS	POS	1280	POS	POS	1280	POS	POS	640	POS	POS	1	0	1	0	2	1	1	0	2	1	2	1	BP
Bermejo	2882.7	POS	160	POS	NEG	320	POS	NEG	160	POS	NEG	320	POS	NEG	0.5	-1	1	0	0.5	-1	0.5	-1	1	0	0.5	-1	OM
Bermejo	370.37	POS	320	POS	NEG	640	POS	POS	320	POS	NEG	320	POS	NEG	0.5	-1	1	0	1	0	0.5	-1	2	1	1	0	BR
Bermejo	307.84	POS	20	POS	NEG	20	POS	NEG	10	NEG	NEG	320	POS	NEG	1	0	2	1	0.0625	-4	0.5	-1	0.0625	-4	0.03125	-5	OM
Bermejo	4533	POS	640	POS	POS	320	POS	NEG	640	POS	POS	10	NEG	NEG	2	1	1	0	64	6	2	1	32	5	64	6	BP
Bermejo	6157.6	POS	5120	POS	POS	640	POS	POS	1280	POS	POS	320	POS	NEG	8	3	4	2	16	4	2	1	2	1	4	2	BP
Bermejo	7640.2	POS	2560	POS	POS	1280	POS	POS	2560	POS	POS	640	POS	POS	2	1	1	0	4	2	2	1	2	1	4	2	BP
Bermejo	1289.3	POS	80	POS	NEG	320	POS	NEG	80	POS	NEG	80	POS	NEG	0.25	-2	1	0	1	0	0.25	-2	4	2	1	0	BR
Bermejo	2170.2	POS	640	POS	POS	640	POS	POS	320	POS	NEG	320	POS	NEG	1	0	2	1	2	1	0.5	-1	2	1	1	0	BP
Bermejo	1977.6	POS	160	POS	NEG	320	POS	NEG	40	POS	NEG	80	POS	NEG	0.5	-1	4	2	2	1	0.125	-3	4	2	0.5	-1	BR
Bermejo	1498	POS	160	POS	NEG	320	POS	NEG	40	POS	NEG	40	POS	NEG	0.5	-1	4	2	4	2	0.125	-3	8	3	1	0	BR
Bermejo	2903	POS	640	POS	POS	1280	POS	POS	320	POS	NEG	320	POS	NEG	0.5	-1	2	1	2	1	0.25	-2	4	2	1	0	BR
Bermejo	3171.7	POS	320	POS	NEG	160	POS	NEG	80	POS	NEG	160	POS	NEG	2	1	4	2	2	1	0.5	-1	1	0	0.5	-1	BP
Bermejo	1544	POS	640	POS	POS	320	POS	NEG	320	POS	NEG	160	POS	NEG	2	1	2	1	4	2	1	0	2	1	2	1	BP
Bermejo	1830.6	POS	160	POS	NEG	160	POS	NEG	320	POS	NEG	40	POS	NEG	1	0	0.5	-1	4	2	2	1	4	2	8	3	IN
Bermejo	1013.3	POS	160	POS	NEG	320	POS	NEG	320	POS	NEG	160	POS	NEG	0.5	-1	0.5	-1	1	0	1	0	2	1	2	1	BR
Bermejo	100	POS	80	POS	NEG	80	POS	NEG	80	POS	NEG	10	NEG	NEG	1	0	1	0	8	3	1	0	8	3	8	3	BP
Bermejo	261.88	POS	20	POS	NEG	10	NEG	NEG	40	POS	NEG	10	NEG	NEG	2	1	0.5	-1	2	1	4	2	1	0	4	2	IN
Bermejo	5983.1	POS	2560	POS	POS	5120	POS	POS	2560	POS	POS	2560	POS	POS	0.5	-1	1	0	1	0	0.5	-1	2	1	1	0	BR
Bermejo	4971.5	POS	1280	POS	POS	640	POS	POS	2560	POS	POS	640	POS	POS	2	1	0.5	-1	2	1	4	2	1	0	4	2	IN
Bermejo	4639.1	POS	2560	POS	POS	2560	POS	POS	5120	POS	POS	2560	POS	POS	1	0	0.5	-1	1	0	2	1	1	0	2	1	IN
Bermejo	6657.4	POS	2560	POS	POS	5120	POS	POS	1280	POS	POS	640	POS	POS	0.5	-1	2	1	4	2	0.25	-2	8	3	2	1	BR
Bermejo	3320.2	POS	640	POS	POS	640	POS	POS	640	POS	POS	320	POS	NEG	1	0	1	0	2	1	1	0	2	1	2	1	BP
Bermejo	2881.8	POS	640	POS	POS	2560	POS	POS	2560	POS	POS	1280	POS	POS	0.25	-2	0.25	-2	0.5	-1	1	0	2	1	2	1	BR
Bermejo	12.246	NEG	10	NEG	NEG	10	NEG	NEG	10	NEG	NEG	10	NEG	NEG	1	0	1	0	1	0	1	0	1	0	1	0	NEG_ELISA
Bermejo	106.8	POS	80	POS	NEG	40	POS	NEG	40	POS	NEG	20	POS	NEG	2	1	2	1	4	2	1	0	2	1	2	1	BP
Bermejo	8716.6	POS	2560	POS	POS	1280	POS	POS	1280	POS	POS	80	POS	NEG	2	1	2	1	32	5	1	0	16	4	16	4	BP
Bermejo	4691	POS	640	POS	POS	1280	POS	POS	320	POS	NEG	320	POS	NEG	0.5	-1	2	1	2	1	0.25	-2	4	2	1	0	BR
Bermejo	3354.2	POS	2560	POS	POS	2560	POS	POS	2560	POS	POS	2560	POS	POS	1	0	1	0	1	0	1	0	1	0	1	0	OM
Bermejo	4283.2	POS	1280	POS	POS	1280	POS	POS	1280	POS	POS	320	POS	NEG	1	0	1	0	4	2	1	0	4	2	4	2	BP
Bermejo	8342.2	POS	2560	POS	POS	2560	POS	POS	2560	POS	POS	640	POS	POS	1	0	1	0	4	2	1	0	4	2	4	2	BP
Bermejo	5210.7	POS	640	POS	POS	640	POS	POS	640	POS	POS	1280	POS	POS	1	0	1	0	0.5	-1	1	0	0.5	-1	0.5	-1	OM
Bermejo	831.52	POS	320	POS	NEG	80	POS	NEG	80	POS	NEG	160	POS	NEG	4	2	4	2	2	1	1	0	0.5	-1	0.5	-1	BP
Bermejo	4449.8	POS	1280	POS	POS	320	POS	NEG	320	POS	NEG	160	POS	NEG	4	2	4	2	8	3	1	0	2	1	2	1	BP
Bermejo	4830.1	POS	1280	POS	POS	640	POS	POS	640	POS	POS	640	POS	POS	2	1	2	1	2	1	1	0	1	0	1	0	BP
Bermejo	2136.4	POS	320	POS	NEG	1280	POS	POS	640	POS	POS	40	POS	NEG	0.25	-2	0.5	-1	8	3	0.5	-1	32	5	16	4	BR
Bermejo	1345.4	POS	80	POS	NEG	80	POS	NEG	40	POS	NEG	80	POS	NEG	1	0	2	1	1	0	0.5	-1	1	0	0.5	-1	OM
Bermejo	1647.5	POS	320	POS	NEG	640	POS	POS	320	POS	NEG	320	POS	NEG	0.5	-1	1	0	1	0	0.5	-1	2	1	1	0	BR
Bermejo	2270.4	POS	160	POS	NEG	160	POS	NEG	320	POS	NEG	40	POS	NEG	1	0	0.5	-1	4	2	2	1	4	2	8	3	IN
Bermejo	4936.1	POS	2560	POS	POS	160	POS	NEG	2560	POS	POS	160	POS	NEG	16	4	1	0	16	4	16	4	1	0	16	4	BP
Bermejo	635.84	POS	80	POS	NEG	10	NEG	NEG	160	POS	NEG	160	POS	NEG	8	3	0.5	-1	0.5	-1	16	4	0.0625	-4	1	0	OM
Bermejo	1913.7	POS	640	POS	POS	160	POS	NEG	640	POS	POS	320	POS	NEG	4	2	1	0	2	1	4	2	0.5	-1	2	1	BP
Bermejo	6879.7	POS	5120	POS	POS	10240	POS	POS	2560	POS	POS	2560	POS	POS	0.5	-1	2	1	2	1	0.25	-2	4	2	1	0	BR
Bermejo	1526	POS	160	POS	NEG	320	POS	NEG	80	POS	NEG	160	POS	NEG	0.5	-1	2	1	1	0	0.25	-2	2	1	0.5	-1	BR
Bermejo	1351.6	POS	320	POS	NEG	320	POS	NEG	160	POS	NEG	160	POS	NEG	1	0	2	1	2	1	0.5	-1	2	1	1	0	BP
Bermejo	1909.1	POS	640	POS	POS	640	POS	POS	640	POS	POS	320	POS	NEG	1	0	1	0	2	1	1	0	2	1	2	1	BP
Bermejo	347.87	POS	160	POS	NEG	80	POS	NEG	80	POS	NEG	80	POS	NEG	2	1	2	1	2	1	1	0	1	0	1	0	BP
Bermejo	850.21	POS	320	POS	NEG	320	POS	NEG	320	POS	NEG	320	POS	NEG	1	0	1	0	1	0	1	0	1	0	1	0	OM
Bermejo	2030.5	POS	320	POS	NEG	160	POS	NEG	160	POS	NEG	40	POS	NEG	2	1	2	1	8	3	1	0	4	2	4	2	BP
Bermejo	8307.1	POS	5120	POS	POS	5120	POS	POS	5120	POS	POS	1280	POS	POS	1	0	1	0	4	2	1	0	4	2	4	2	BP
Bermejo	212	POS	20	POS	NEG	10	NEG	NEG	10	NEG	NEG	10	NEG	NEG	2	1	2	1	2	1	1	0	1	0	1	0	BP
Bermejo	605.67	POS	320	POS	NEG	320	POS	NEG	160	POS	NEG	40	POS	NEG	1	0	2	1	8	3	0.5	-1	8	3	4	2	BP
Bermejo	632.28	POS	320	POS	NEG	1280	POS	POS	640	POS	POS	80	POS	NEG	0.25	-2	0.5	-1	4	2	0.5	-1	16	4	8	3	BR
Bermejo	1578.5	POS	640	POS	POS	640	POS	POS	1280	POS	POS	160	POS	NEG	1	0	0.5	-1	4	2	2	1	4	2	8	3	IN
Bermejo	2600.4	POS	320	POS	NEG	1280	POS	POS	320	POS	NEG	320	POS	NEG	0.25	-2	1	0	1	0	0.25	-2	4	2	1	0	BR
Bermejo	1774.6	POS	320	POS	NEG	320	POS	NEG	640	POS	POS	640	POS	POS	1	0	0.5	-1	0.5	-1	2	1	0.5	-1	1	0	OM
Bermejo	3307.5	POS	640	POS	POS	5120	POS	POS	640	POS	POS	2560	POS	POS	0.125	-3	1	0	0.25	-2	0.125	-3	2	1	0.25	-2	BR
Bermejo	376.24	POS	80	POS	NEG	40	POS	NEG	20	POS	NEG	10	NEG	NEG	2	1	4	2	8	3	0.5	-1	4	2	2	1	BP
Bermejo	2681.3	POS	640	POS	POS	320	POS	NEG	320	POS	NEG	80	POS	NEG	2	1	2	1	8	3	1	0	4	2	4	2	BP
Bermejo	2038.9	POS	640	POS	POS	640	POS	POS	320	POS	NEG	320	POS	NEG	1	0	2	1	2	1	0.5	-1	2	1	1	0	BP
Bermejo	348.61	POS	40	POS	NEG	160	POS	NEG	80	POS	NEG	40	POS	NEG	0.25	-2	0.5	-1	1	0	0.5	-1	4	2	2	1	BR
Bermejo	294.19	POS	320	POS	NEG	640	POS	POS	320	POS	NEG	80	POS	NEG	0.5	-1	1	0	4	2	0.5	-1	8	3	4	2	BR
Bermejo	378.1	POS	160	POS	NEG	40	POS	NEG	80	POS	NEG	40	POS	NEG	4	2	2	1	4	2	2	1	1	0	2	1	BP
Bermejo	6149.6	POS	2560	POS	POS	1280	POS	POS	640	POS	POS	640	POS	POS	2	1	4	2	4	2	0.5	-1	2	1	1	0	BP
Bermejo	2933.2	POS	2560	POS	POS	5120	POS	POS	2560	POS	POS	5120	POS	POS	0.5	-1	1	0	0.5	-1	0.5	-1	1	0	0.5	-1	OM
Bermejo	2026.2	POS	320	POS	NEG	1280	POS	POS	1280	POS	POS	320	POS	NEG	0.25	-2	0.25	-2	1	0	1	0	4	2	4	2	BR
Bermejo	4438.4	POS	1280	POS	POS	10240	POS	POS	640	POS	POS	640	POS	POS	0.125	-3	2	1	2	1	0.0625	-4	16	4	1	0	BR
Bermejo	1682.2	POS	640	POS	POS	640	POS	POS	640	POS	POS	160	POS	NEG	1	0	1	0	4	2	1	0	4	2	4	2	BP
Bermejo	2013.6	POS	320	POS	NEG	1280	POS	POS	640	POS	POS	640	POS	POS	0.25	-2	0.5	-1	0.5	-1	0.5	-1	2	1	1	0	BR
Bermejo	3011.4	POS	640	POS	POS	5120	POS	POS	1280	POS	POS	640	POS	POS	0.125	-3	0.5	-1	1	0	0.25	-2	8	3	2	1	BR
Bermejo	1344.6	POS	320	POS	NEG	160	POS	NEG	320	POS	NEG	80	POS	NEG	2	1	1	0	4	2	2	1	2	1	4	2	BP
Bermejo	260.42	POS	20	POS	NEG	20	POS	NEG	20	POS	NEG	320	POS	NEG	1	0	1	0	0.0625	-4	1	0	0.0625	-4	0.0625	-4	OM
Bermejo	2000.8	POS	640	POS	POS	640	POS	POS	320	POS	NEG	320	POS	NEG	1	0	2	1	2	1	0.5	-1	2	1	1	0	BP
Bermejo	342.86	POS	80	POS	NEG	1280	POS	POS	160	POS	NEG	160	POS	NEG	0.0625	-4	0.5	-1	0.5	-1	0.125	-3	8	3	1	0	BR
Bermejo	4089.8	POS	1280	POS	POS	5120	POS	POS	1280	POS	POS	1280	POS	POS	0.25	-2	1	0	1	0	0.25	-2	4	2	1	0	BR
Bermejo	341.53	POS	80	POS	NEG	80	POS	NEG	160	POS	NEG	10	NEG	NEG	1	0	0.5	-1	8	3	2	1	8	3	16	4	IN
Bermejo	597.96	POS	40	POS	NEG	80	POS	NEG	40	POS	NEG	160	POS	NEG	0.5	-1	1	0	0.25	-2	0.5	-1	0.5	-1	0.25	-2	OM
Bermejo	4079.2	POS	640	POS	POS	640	POS	POS	1280	POS	POS	320	POS	NEG	1	0	0.5	-1	2	1	2	1	2	1	4	2	IN
Bermejo	623.77	POS	160	POS	NEG	320	POS	NEG	160	POS	NEG	80	POS	NEG	0.5	-1	1	0	2	1	0.5	-1	4	2	2	1	BR
Bermejo	602.16	POS	160	POS	NEG	640	POS	POS	320	POS	NEG	160	POS	NEG	0.25	-2	0.5	-1	1	0	0.5	-1	4	2	2	1	BR
Bermejo	7347	POS	2560	POS	POS	2560	POS	POS	2560	POS	POS	320	POS	NEG	1	0	1	0	8	3	1	0	8	3	8	3	BP
Bermejo	1252.1	POS	640	POS	POS	1280	POS	POS	1280	POS	POS	160	POS	NEG	0.5	-1	0.5	-1	4	2	1	0	8	3	8	3	BR
Bermejo	7136.8	POS	5120	POS	POS	2560	POS	POS	2560	POS	POS	5120	POS	POS	2	1	2	1	1	0	1	0	0.5	-1	0.5	-1	OM
